# Supplementary material for: Structure and mechanism of the Zorya anti-phage defense system
Source: Research Square preprint supplement (doi:10.21203/rs.3.rs-3768720/v1), 2024-01-04
Supplement: Supplementary file 1 [file 30dfcad746b532b383068e14.pdf]

# Extended Data Figures

## Structure and mechanism of Zorya anti-phage defense system

Haidai Hu<sup>1</sup>, Thomas C.D. Hughes<sup>2</sup>, Philipp F. Popp<sup>3</sup>, Aritz Roa-Eguiara<sup>1</sup>, Freddie J.O. Martin<sup>1</sup>, Nicole R. Rutbeek<sup>1</sup>, Ivo Alexander Hendriks<sup>4</sup>, Leighton J. Payne<sup>2</sup>, Yumeng Yan<sup>1</sup>, Victor Klein de Sousa<sup>1</sup>, Yong Wang<sup>5</sup>, Michael Lund Nielsen<sup>4</sup>, Richard M. Berry<sup>7</sup>, Marc Erhardt<sup>3,8</sup>, Simon A. Jackson<sup>2\*</sup>, Nicholas M.I. Taylor<sup>1\*</sup>

<sup>1</sup>Structural Biology of Molecular Machines Group, Protein Structure & Function Program, Novo Nordisk Foundation Center for Protein Research, Faculty of Health and Medical Sciences, University of Copenhagen, Blegdamsvej 3B, 2200 Copenhagen, Denmark.

<sup>2</sup>Department of Microbiology and Immunology, University of Otago.

<sup>3</sup>Institute for Biology/Molecular Microbiology, Humboldt-Universität zu Berlin, Philippstr. 13, 10115 Berlin, Germany.

<sup>4</sup> Proteomics program, Novo Nordisk Foundation Center for Protein Research, Faculty of Health and Medical Sciences, University of Copenhagen, Blegdamsvej 3B, 2200 Copenhagen, Denmark.

<sup>5</sup>College of Life Sciences, Zhejiang University, Hangzhou 310027, China.

<sup>6</sup>Department of Plant and Environmental Sciences, University of Copenhagen, Frederiksberg C, Denmark.

<sup>7</sup>Department of Physics and Kavli Institute for Nanoscience Discovery, University of Oxford, Oxford, United Kingdom.

<sup>8</sup>Max Planck Unit for the Science of Pathogens, Berlin, Germany.

\*Correspondence: Simon Jackson, [simon.jackson@otago.ac.nz](mailto:simon.jackson@otago.ac.nz)  
Nicholas Taylor, [nicholas.taylor@cpr.ku.dk](mailto:nicholas.taylor@cpr.ku.dk)

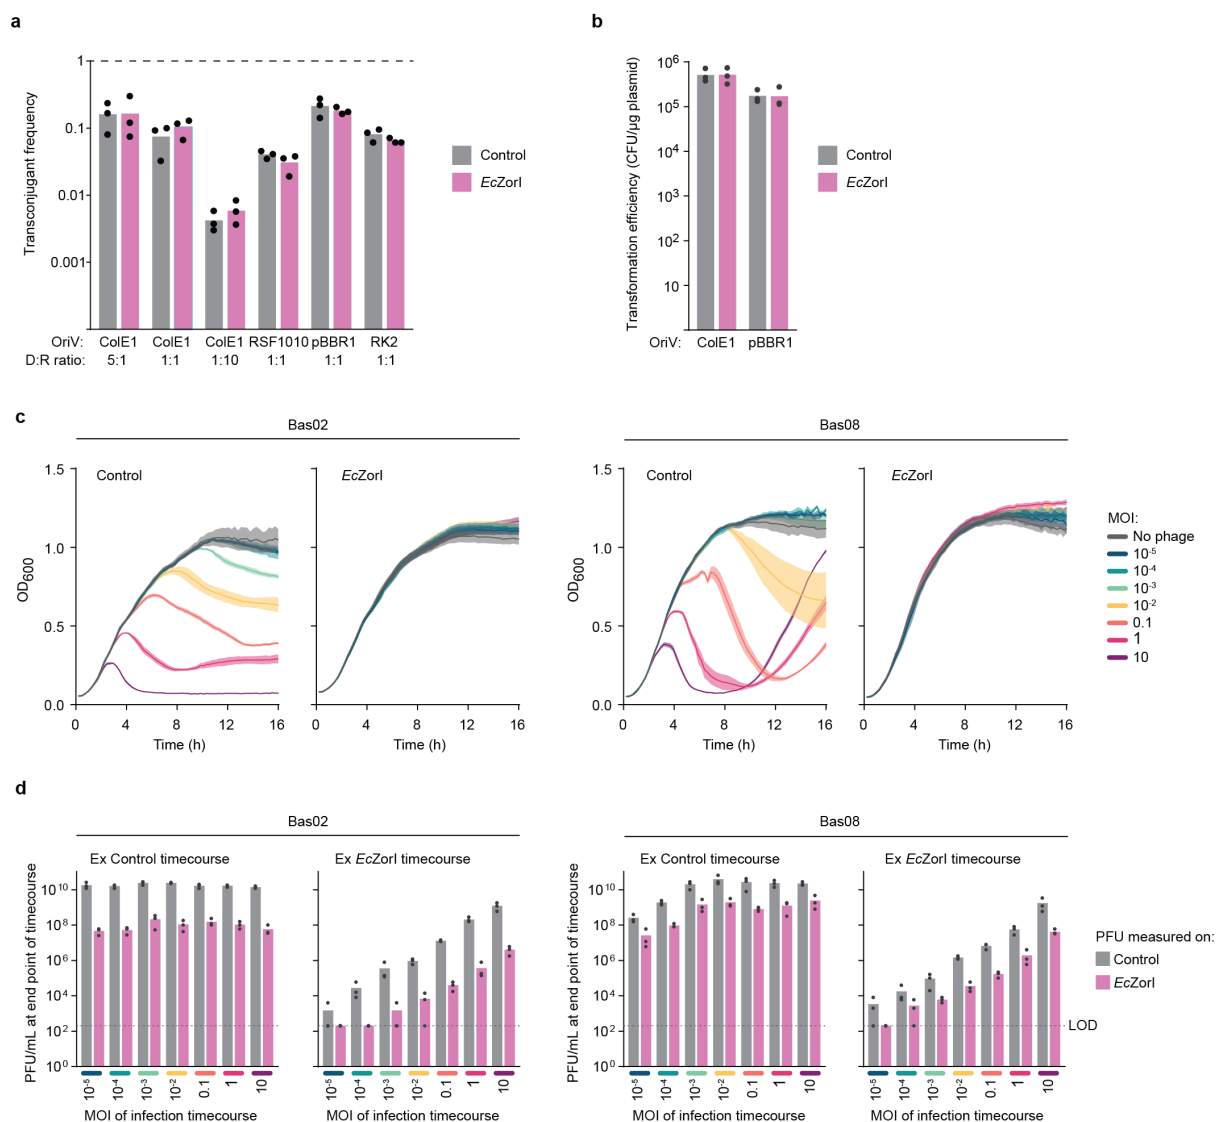

# **Extended Data Figure 1. *E. coli* Zorya type I protects against phage invasion but not bacterial conjugation or plasmid transformation.**

**a**, The impact of *EcZorI* on the uptake of plasmid DNA via conjugation from an *E. coli* donor strain, measured as the transconjugant frequency (number of transconjugants/total recipients). Four plasmids with different origins of replication (OriV) were tested (ColE1, RSF1010, pBBR1 and RK2), at the indicated donor to recipient cell ratios (D:R) for the matings. Data represent the mean of three replicates. **b**, The impact of *EcZorI* on the uptake of plasmid DNA via transformation. Chemically competent *E. coli* without (control; empty vector) or with *EcZorI* were transformed with plasmids possessing either ColE1 or pBBR1 origins of replication. Data represent the mean of three replicates, with each replicate being a different batch of competent cells. **c**, Infection time courses for liquid cultures of *E. coli*, with and without *EcZorI*, infected at different multiplicities of infection (MOI) of phage Bas02 and Bas08. **d**, Phage titers at the end timepoint for each sample from the infection time courses (**c**), measured as EOP on indicator lawns of *E. coli* either without (control) or with *EcZorI*. LOD: Limit of detection.

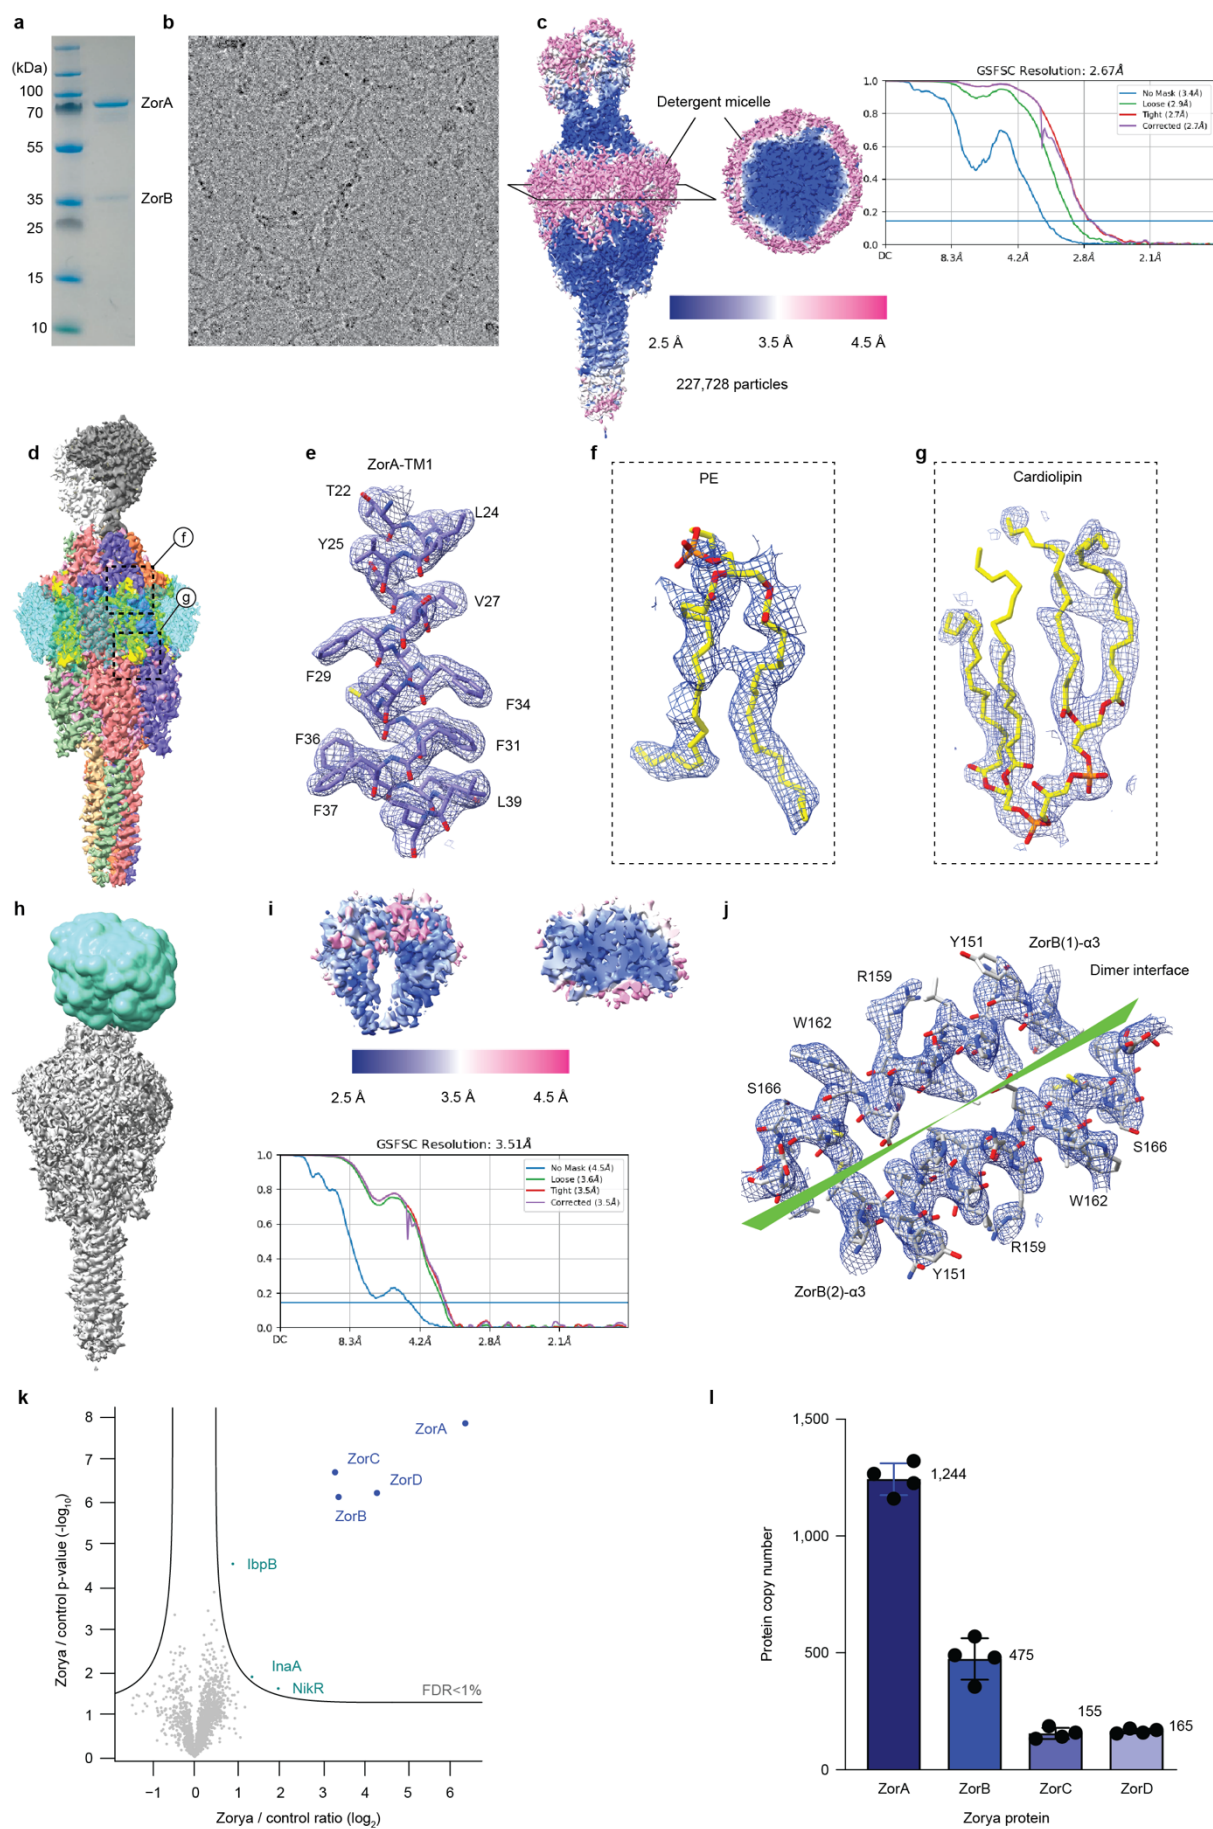

**Extended Data Figure 2. Cryo-EM dataset processing results and resolution of *EcZorAB*.**

**a**, A representative SDS gel of the purified *EcZorAB* complex. **b**, An EM image of the *EcZorAB* sample under the cryogenic conditions. **c**, Cryo-EM density map of *EcZorAB* colored by local resolution (in Å) estimated in cryoSPARC with gold standard (0.143) Fourier Shell Correlation (GSFSC) curves. **d**, Cryo-EM map of *EcZorAB*. **e-g**, Representative model segments of ZorA and non-residual molecules fitted into EM density, focusing on one of ZorA subunit's TM1, and lipids found in the TMD of ZorA. **h-i**, Strategy of the local refinement of the ZorB PGBDs with a soft mask. **j**, A representative of a model segment of the ZorB PGBDs fitted into EM density map, focusing on the PGBD dimerized interface. **k**, Volcano plot analysis, visualizing ratio and significance of change between all proteins quantified by mass spectrometry in *E. coli* total lysates either transformed with p*EcZorI* plasmids or not (**Extended Data Table 2**). Significance was tested via two-tailed two-sample Student's t-testing with permutation-based FDR control, ensuring a corrected p-value of < 0.01. n=4 technical replicates derived from n=3 culture replicates. **l**, Absolute copy-number analysis of Zorya proteins expressed in *E. coli*. Determined via comparison of molecular weight-adjusted label-free quantified protein abundance values from this study, to known copy-numbers reported by Schmidt et al.<sup>56</sup>, and establishing a "proteomic ruler" for conversion of measured abundance values to approximate copy-numbers (**Extended Data Table 2**). n=4 technical replicates derived from n=3 culture replicates.



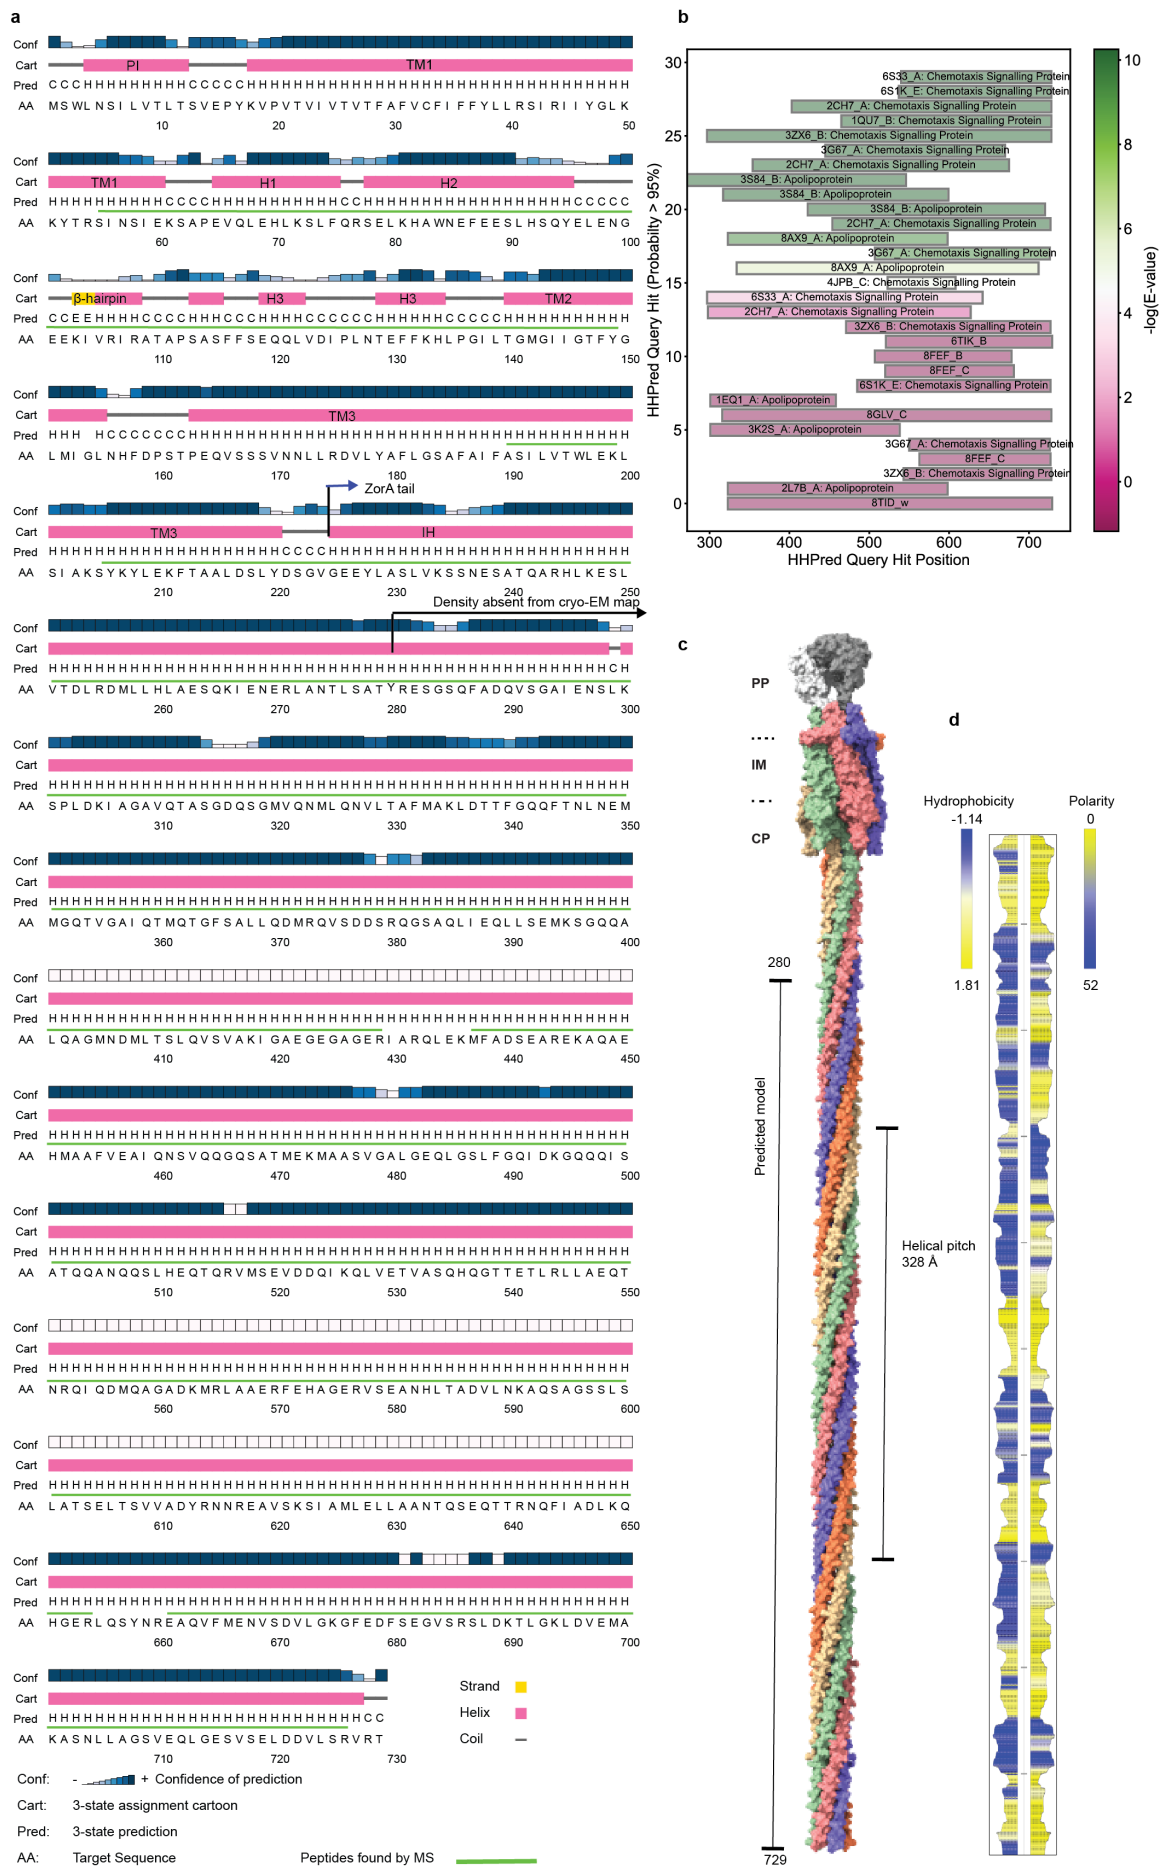

**Extended Data Figure 3. *EcZorA* tail secondary structural prediction and a complete composite model of *EcZorAB* complex.**

**a**, Amino acids and secondary structural predictions (Psidepred) of the *EcZorA*. The peptides found by mass spectrometry that covered ZorA protein are indicated as green lines about the amino acids.

**b**, Top hits from an HHpred sequence homology search of the ZorA tail are shown. **c**, A composite model of *EcZorAB* with the ZorA tail folding into a pentameric super coiled-coil, with the helical pitch of the tail  $\alpha$ -helix shown. **d**, Hydrophobicity and polarity of the inner surface of the ZorA tail calculated by MOLTOnline.

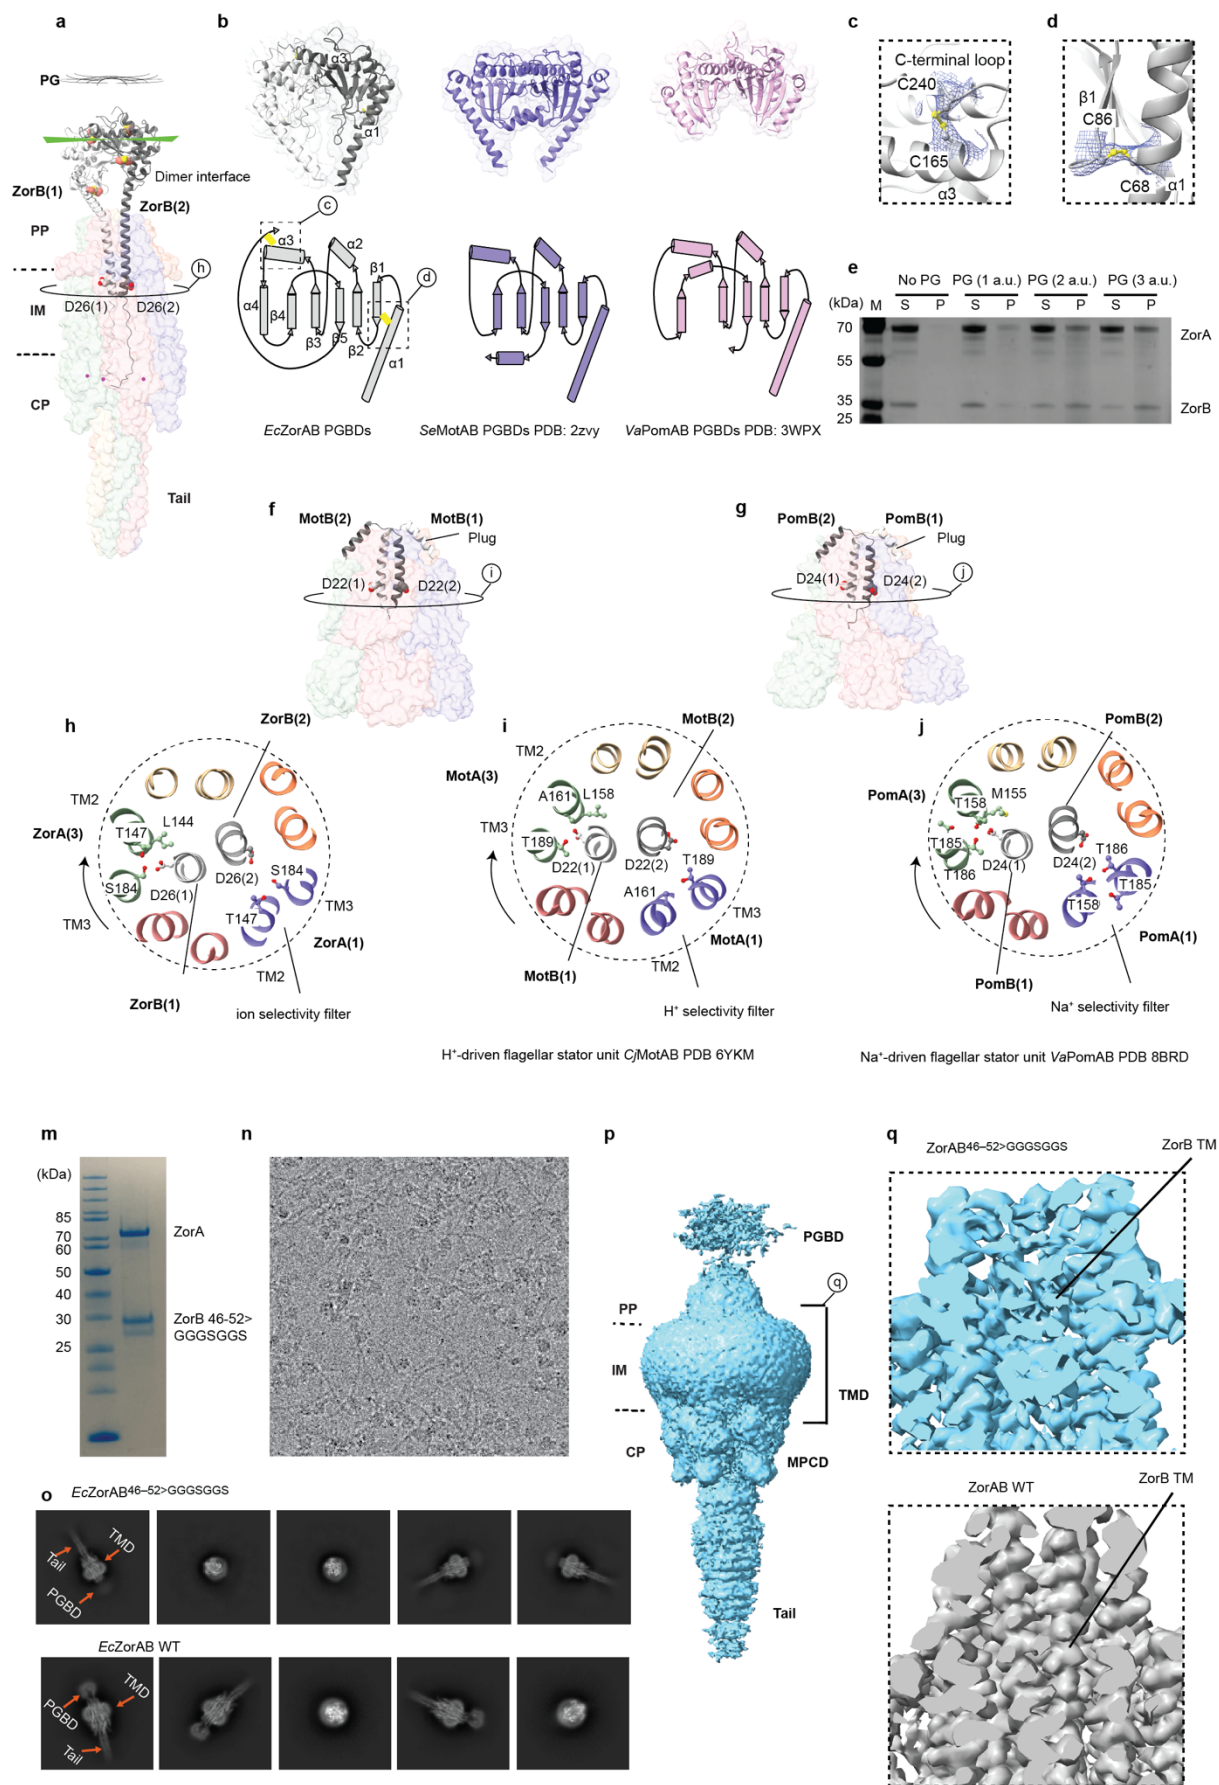

**Extended Data Figure 4. *EcZorAB* is a peptidoglycan binding rotary motor.**

**a**, Cartoon representation of the *EcZorAB* complex in an inactive state, with the ZorB dimerized interfaced highlighted. **b**, Topology diagrams of ZorB and isolated crystal structures of the flagellar stator unit MotB and PomB PGBDs, indicating a conserved folding architecture. **c-d**, The two disulfate bonds identified from ZorB PGBDs, with the EM map overlapped. **e**, Pull-down assay of the isolated *EcZorAB* complex with the purified peptidoglycan. **f**, Cartoon representation of the cryo-EM structure of the proton-driven flagellar stator unit MotAB from *Campylobacter jejuni* (*CjMotAB*) in its inactive state, with the MotB plug motif highlighted. **g**, Cartoon representation of the cryo-EM structure of the sodium-driven flagellar stator unit PomAB from *Vibrio alginolyticus* (*VaPomAB*) in its inactive state. **h**, Cross-section view of the *EcZorAB* TMD, showing the surrounding residues of the two Asp26 from ZorB. **i**, Cross-section view of the *CjMotAB* TMD, showing the surrounding residues of the two Asp22 from MotB. **j**, Cross-section view of *VaPomAB* TMD, showing the surrounding residues of the two Asp24 from PomB. The absence of the strictly conserved threonine residue on ZorA TM3 required for sodium ion binding, indicates that *EcZorAB* is a proton-driven stator unit. **m**, A representative of an SDS gel of the purified *EcZorAB* linker mutant complex (with ZorB residues 46-52 replaced by a GGSGGS linker: *EcZorAB* linker mutant). **n**, An EM image of *EcZorAB* linker mutant sample under the cryogenic conditions. **o**, Representatives of the 2D classes of the *EcZorAB* linker mutant in comparison with that of the *EcZorAB* wild type, highlighting the flexibility of the ZorB PGBDs of the *EcZorAB* linker mutant. **p**, Low pass filter of the Cryo-EM density map of the *EcZorAB* linker mutant after nonuniform refinement. **q**, Transmembrane helix density of the *EcZorAB* linker mutant and that in the wild type *EcZorAB*.

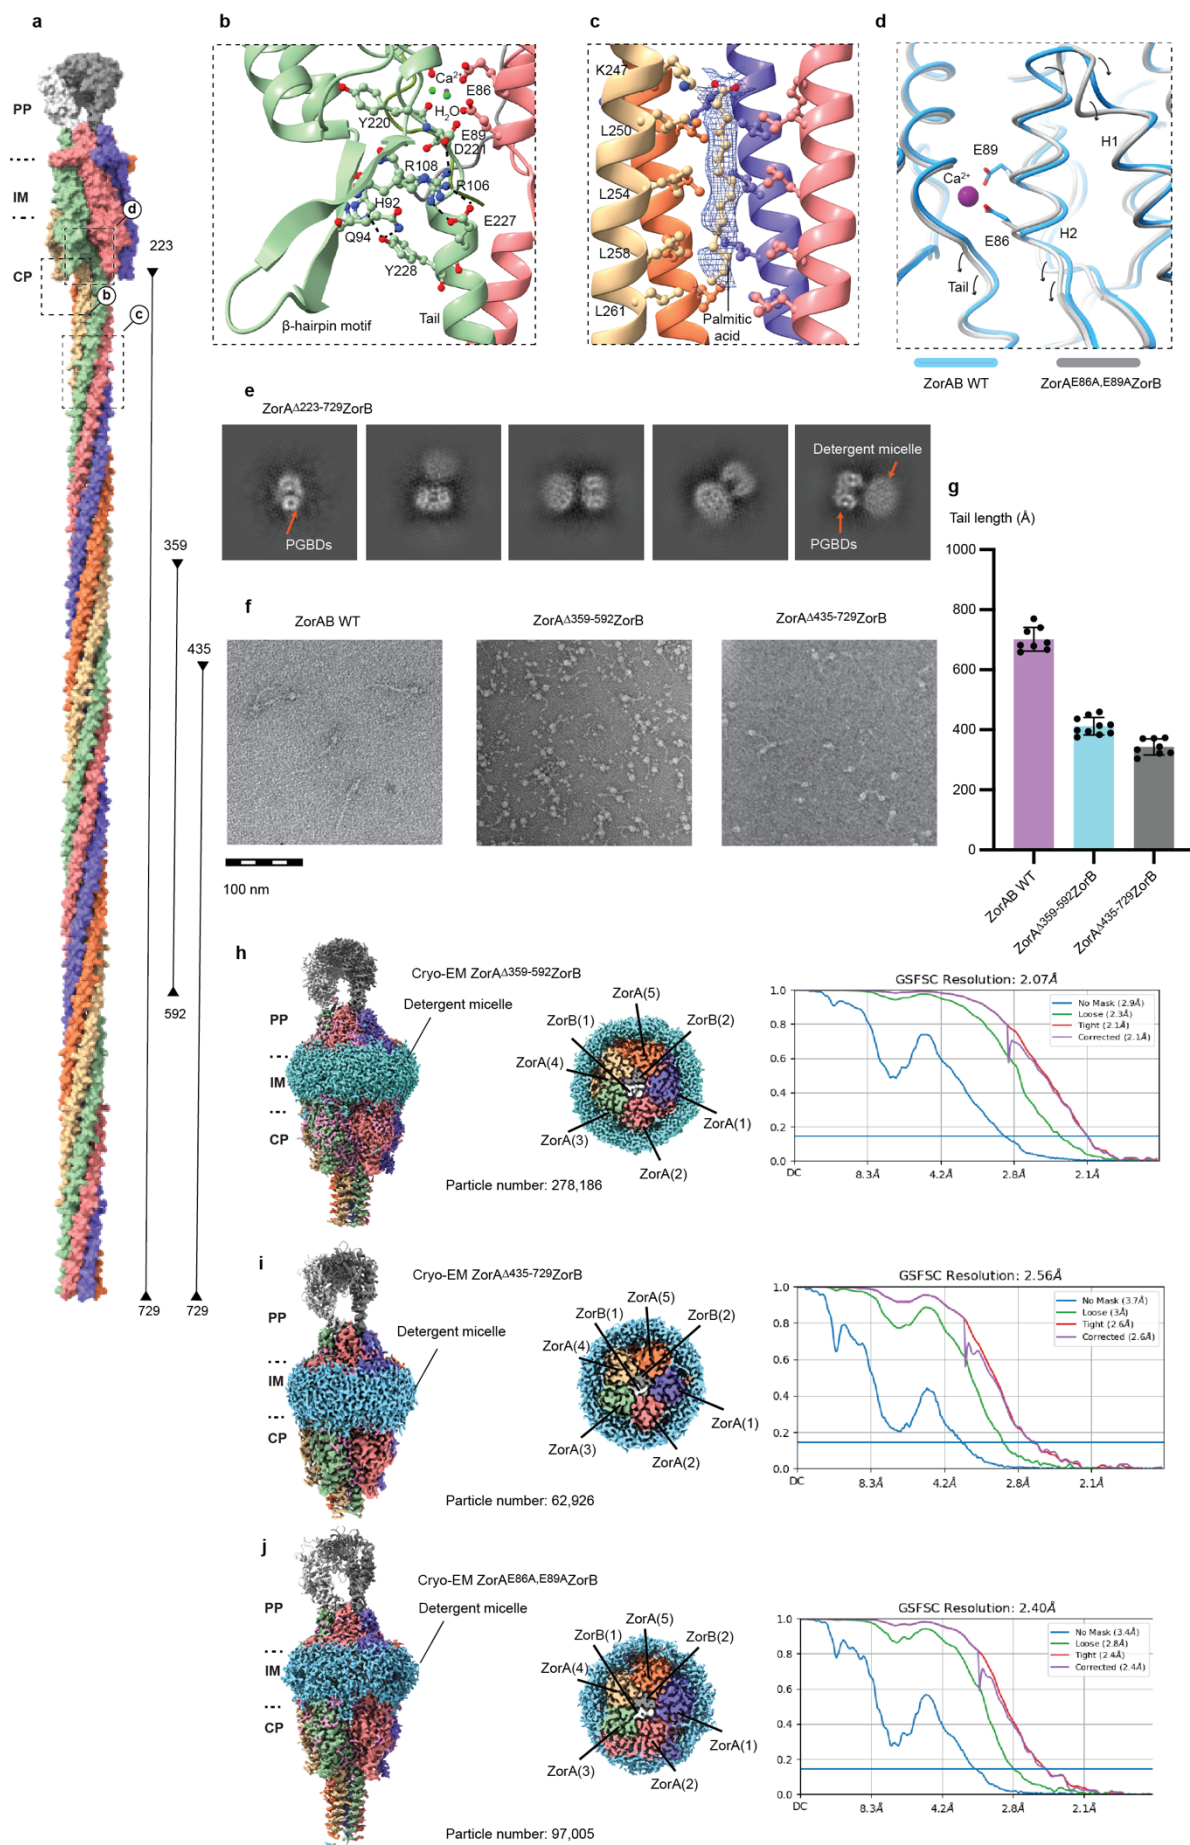

**Extended Data Figure 5. Cryo-EM dataset processing and structures of the *EcZorAB* tail and Ca<sup>2+</sup> binding site mutations.**

**A**, Mutations of the ZorA tail truncations indicated in the composite model of *EcZorAB* complex. **B**, Interaction between the beginning of the ZorA tail and the  $\beta$ -hairpin motif. **C**, Extra density found inside the tail from cryo-EM map, which was modeled as palmitic acid, with the amino acids involved in the interactions indicated. **d**, Structural comparison of the ZorA wild type (cyan) and ZorA Ca<sup>2+</sup> binding site mutation (ZorA<sup>E86A/E89A</sup>, gray), the arrows highlight the changes from wild type to the mutant. **e**, Representative of the 2D classes of the *EcZorAB* ZorA tail complete deletion. **f**, Negative staining images of the *EcZorAB* wild type, ZorA tail middle deletion (ZorA <sup>$\Delta$ 359-592</sup>), ZorA tail tip deletion (ZorA <sup>$\Delta$ 435-729</sup>). **g**, The tail lengths of the *EcZorAB* wild type, ZorA tail middle deletion (ZorA <sup>$\Delta$ 359-592</sup>), ZorA tail tip deletion (ZorA <sup>$\Delta$ 359-592</sup>) as measured in **(f)**. **h-j**, Cryo-EM maps and resolutions of ZorA mutants with gold standard (0.143) Fourier Shell Correlation (GSFSC) curves.



**a**

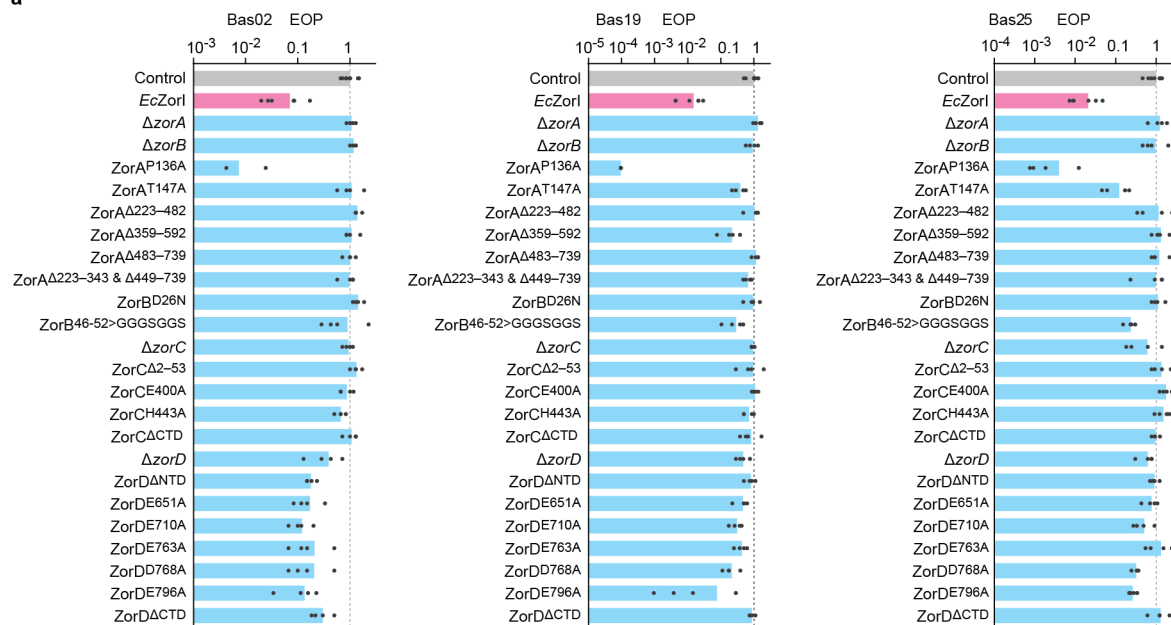

**b**

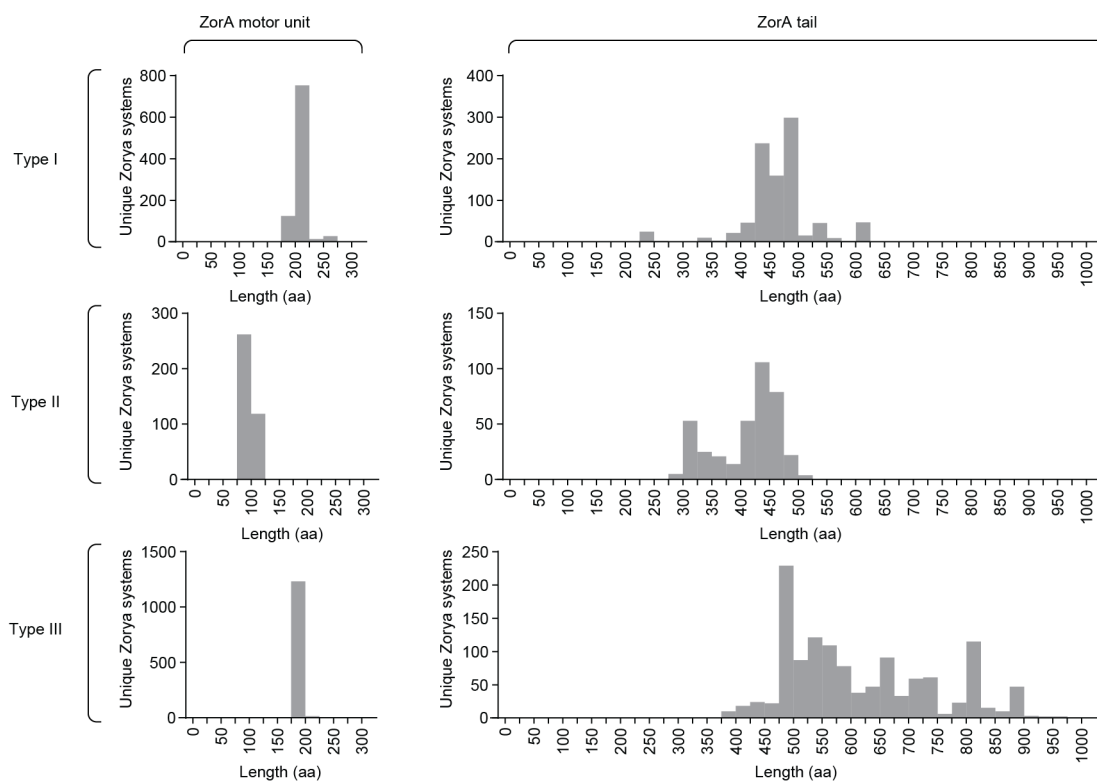

**Extended Data Figure 6. The effects of *EcZorya* mutations on *EcZorI*-mediated anti-phage defense and long ZorA tails are conserved amongst Zorya system types in diverse species.**

**a**, The effects of ZorA, ZorB, ZorC and ZorD mutations on *EcZorI*-mediated anti-phage defense, as measured using EOP assays with phages Bas02, Bas19 and Bas25. Data represent the mean of at least 3 replicates and are normalized to the control samples lacking *EcZorI*. **b**, The ZorA tail lengths found in different Zorya system types. Motor and tail lengths were determined by inspecting the predicted structures of several representative ZorA sequences, then inferring these lengths for the rest of the ZorA sequences through sequence alignment (methods). To reduce sequencing bias, unique Zorya systems encoded in RefSeq (v209) bacteria and archaea genomes were selected based on their distinct genomic context (methods).

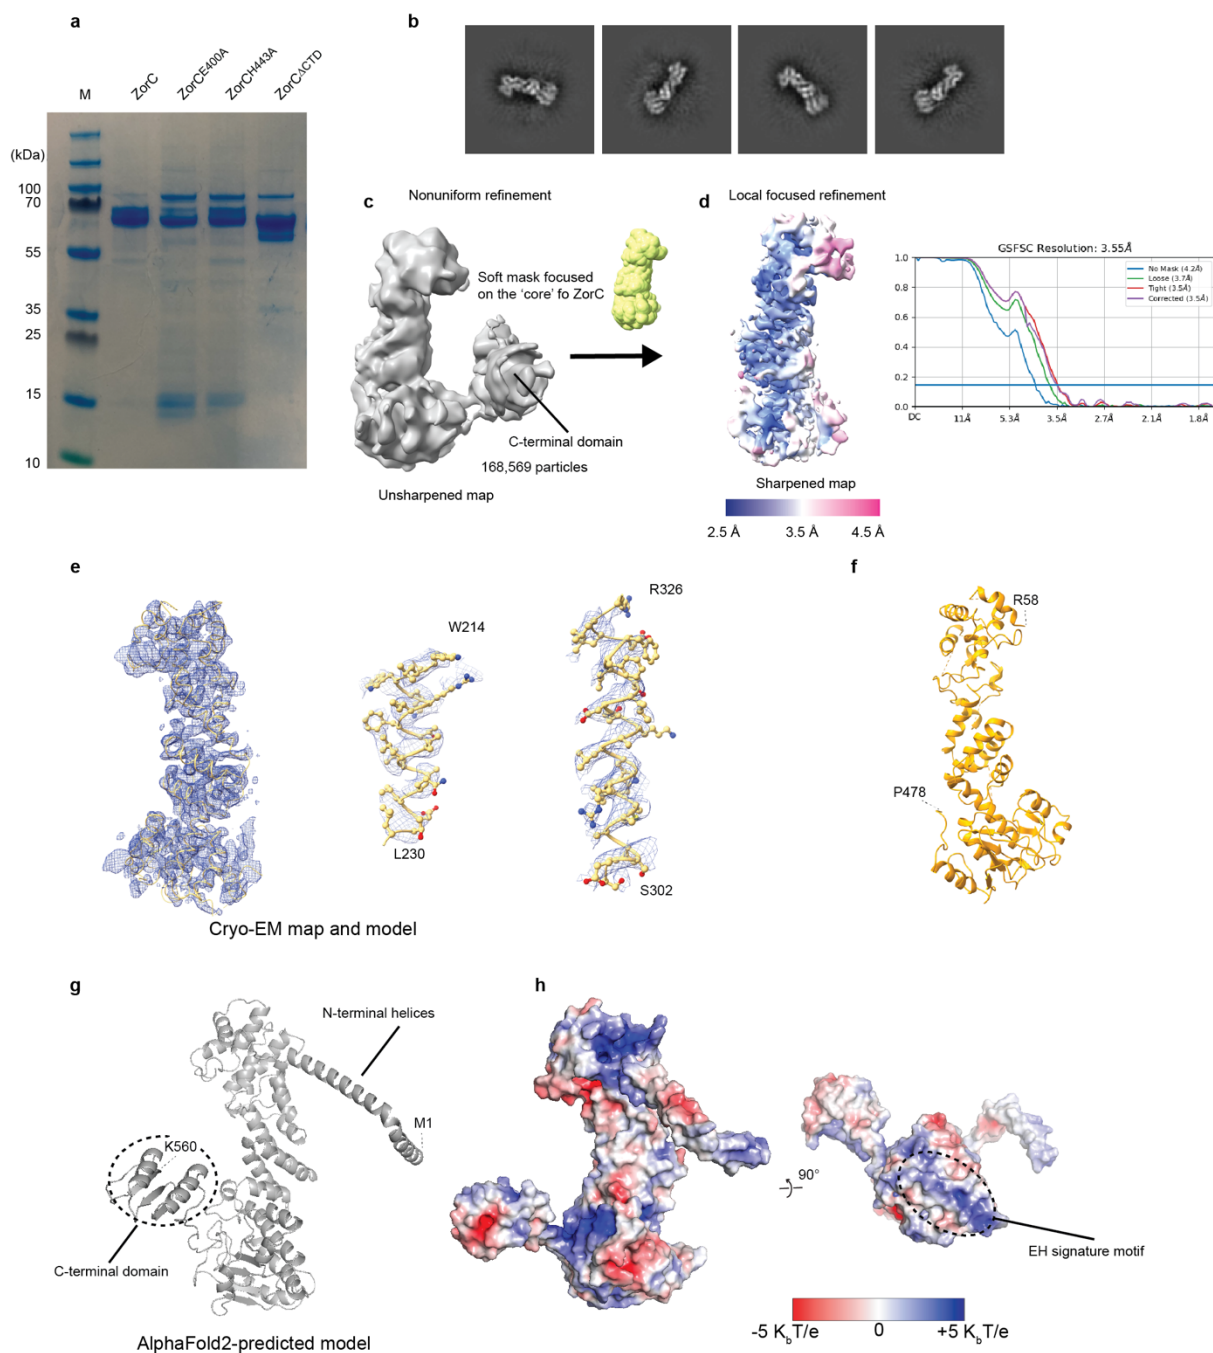

### Extended Data Figure 7. Cryo-EM dataset processing results and functional investigation of *EcZorC*.

**a**, Representative of the SDS gel of the purified ZorC wild type, ZorC<sup>E400A</sup>, ZorC<sup>H443A</sup>, ZorC<sup>ΔCTD</sup> (deletion residues 487-560). **b**, Representatives of the 2D classes of the *EcZorC*. **c**, Unsharpened Cryo-EM map of *EcZorC* with gold standard (0.143) Fourier Shell Correlation (GSFSC) curves shown below. **d**, Local refinement of the *EcZorC* core domain with a soft mask, with the local resolution (in Å) estimated in cryoSPARC. **e**, Representative of a model and segments of the ZorC fitted into EM density map. **f**, Final model of *EcZorC* built from cryo-EM map. **g**, AlphaFold2-predicted ZorC model. **h**, Electrostatic distribution of *EcZorC* calculated from AlphaFold2-predicted model.

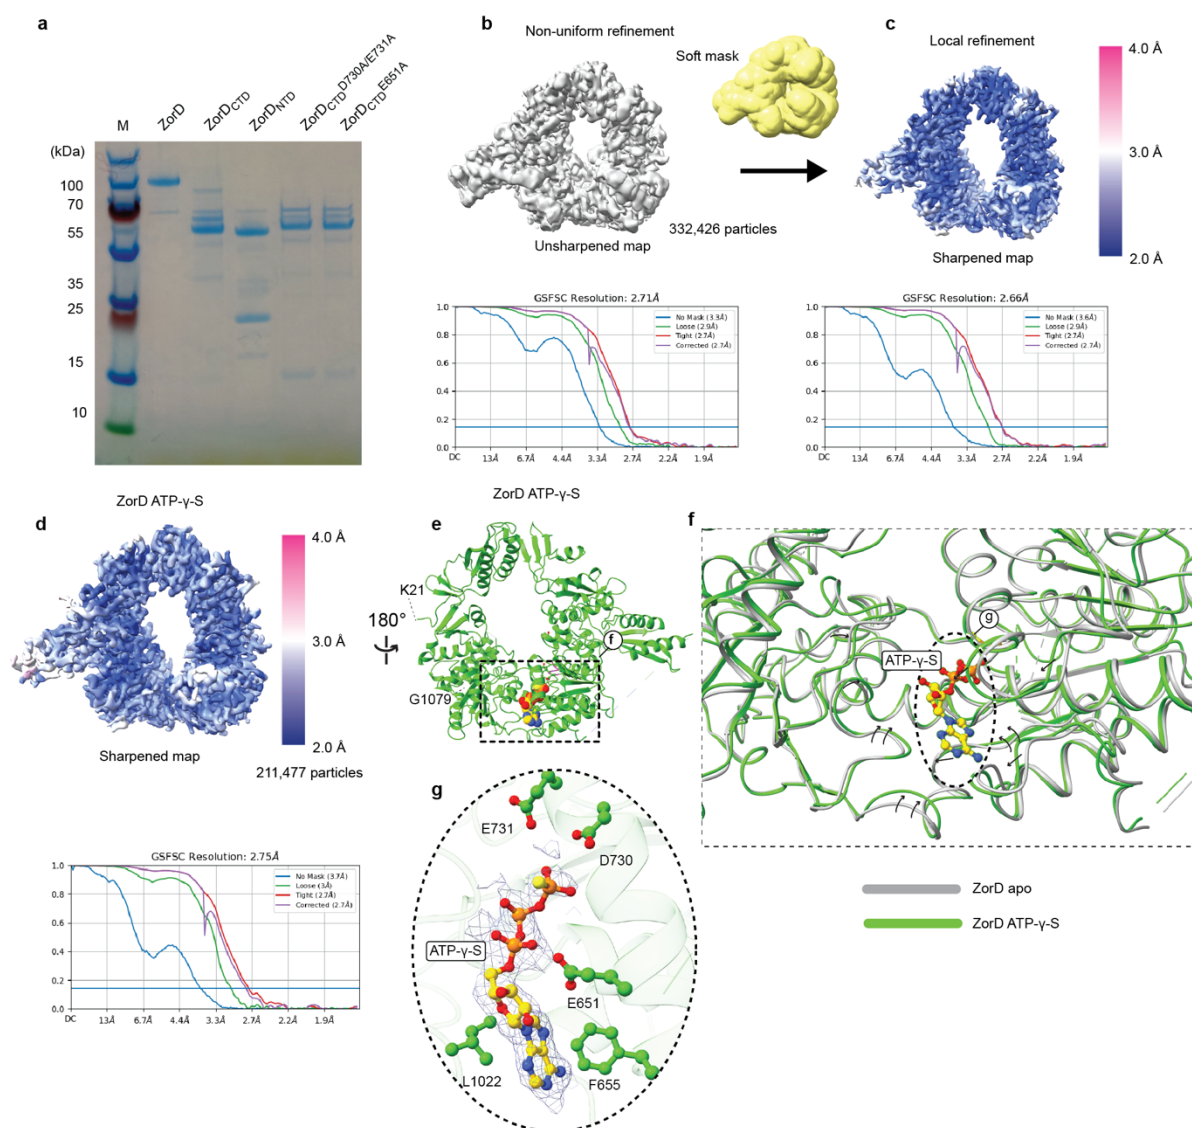

# **Extended Data Figure 8. Cryo-EM dataset processing results and resolutions of *EcZorD* and *EcZorD* in complex with ATP-γ-S.**

**a**, Representative of the SDS gel of the purified ZorD wild type, ZorD<sub>CTD</sub> (residues 503-1080), ZorD<sub>NTD</sub> (residues 1-502), ZorD<sub>CTD</sub><sup>D730A/E731A</sup> and ZorD<sub>CTD</sub><sup>E651A</sup>. Gel is representative of at least 3 replicates. **b**, Unsharpened cryo-EM map of the *EcZorD* apo from with gold standard (0.143) Fourier Shell Correlation (GSFSC) curves shown below. **c**, Local refinement of the *EcZorD* apo form with a soft mask. **d**, Cryo-EM map of *EcZorD* in complex with ATP-γ-S. **e**, Structural model of the *EcZorD* in complex with ATP-γ-S. **f**, Structural comparison of the *EcZorD* apo from (gray) and *EcZorD* in complex with ATP-γ-S (light purple); the arrows highlight the changes from apo form to the ligand-bound form. **g**, Zoomed-in view of the ATP-γ-S binding site, with the cryo-EM map overlaid on the ATP-γ-S.

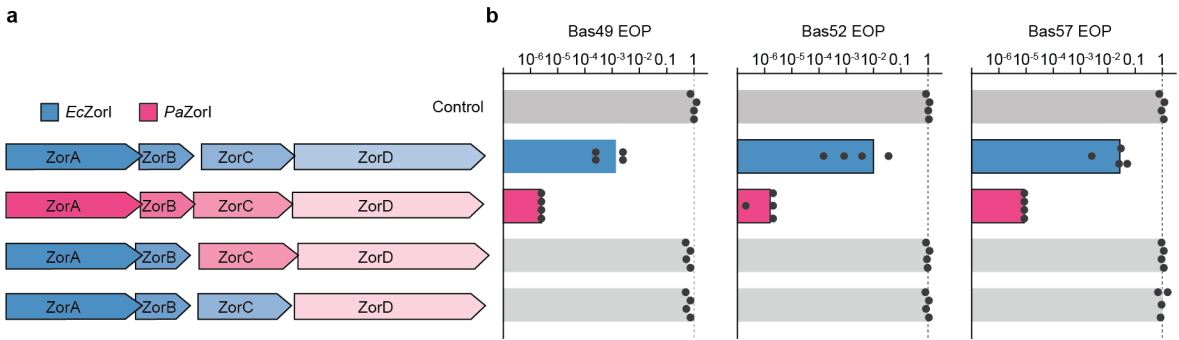

**Extended Data Figure 9. Complementation experiment between *E. coli* and *P. aeruginosa* ZoryaI.**

**a**, Schematic representation of *EcZorI*, *PaZorI* and the constructs for *PaZorCD* or *PaZorD* complementation of *EcZorI* gene deletions. **b**, Anti-phage defense provided by the constructs in (a), as measured using EOP assays for phages Bas49, Bas52 and Bas57. Data represent the mean of at least 3 replicates and are normalized to the control samples lacking Zorya.

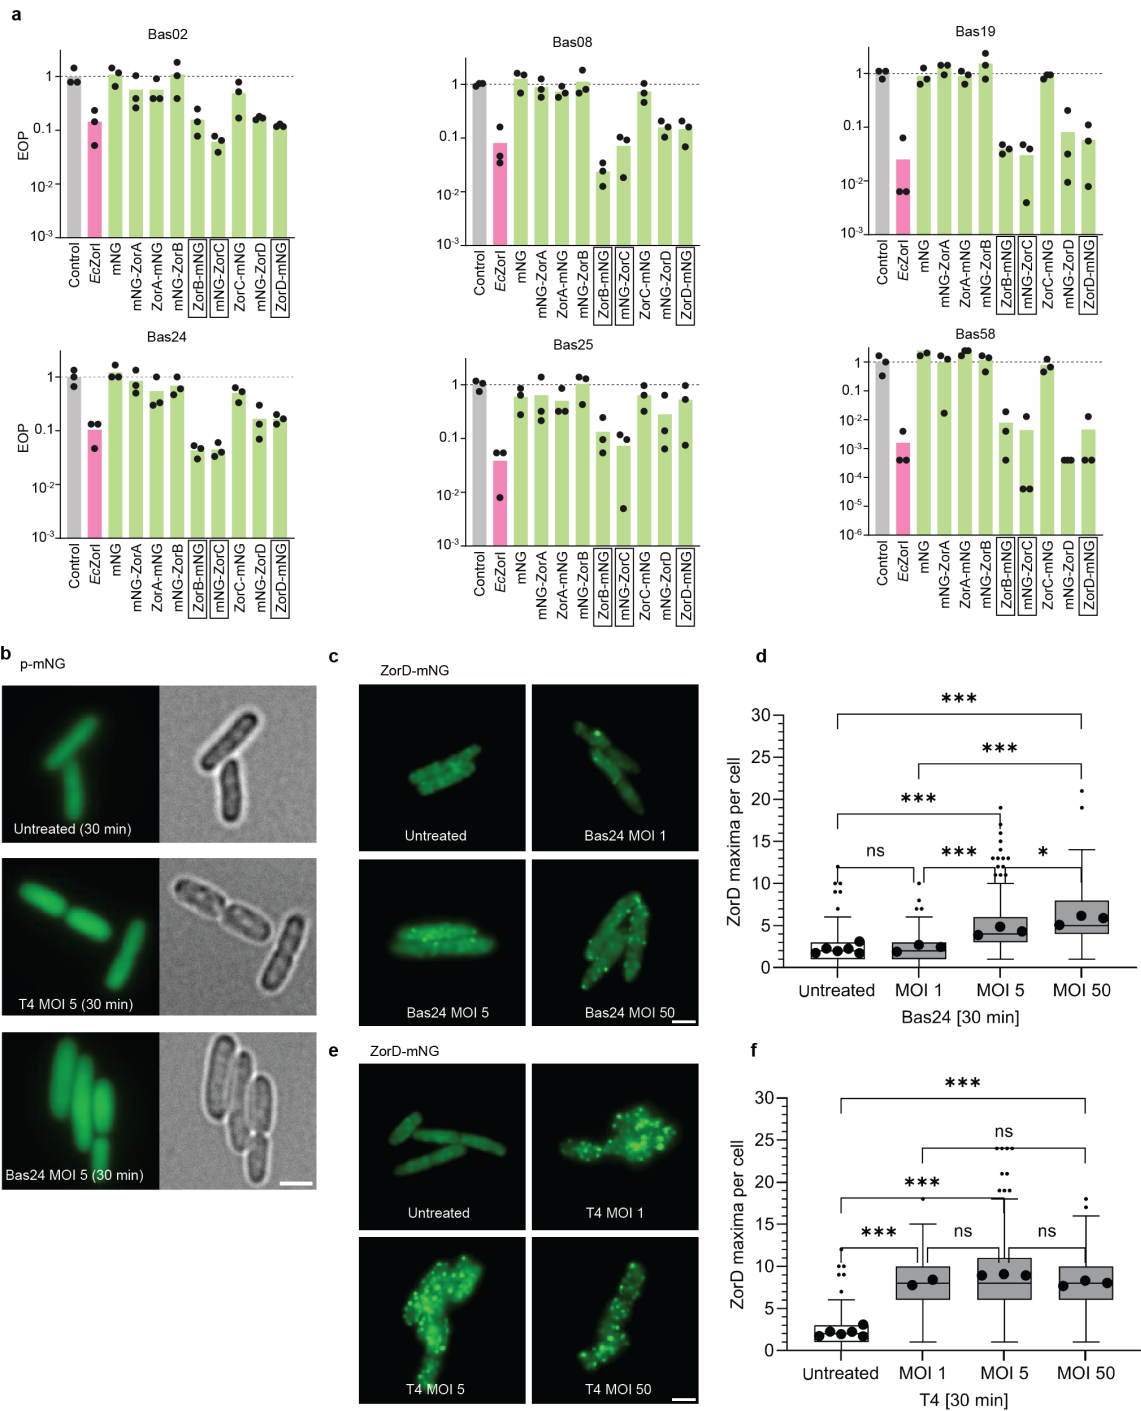



**Extended Data Figure 10. ZorD recruitment during phage invasion at increasing MOIs and mNeongreen localization upon phage exposure.**

**a**, The effects of the mNeongreen (mNG) fusions to *EcZorI* components on anti-phage defense, as measured using EOP assays for phages Bas02, Bas08, Bas19, Bas24, Bas25 and Bas58. Data represent the mean of at least 3 replicates and are normalized to the control samples lacking *EcZorI*. The boxed constructs (ZorB C-terminal mNG fusion: ZorB-mNG; ZorC N-terminal mNG fusion: mNG-ZorB; ZorD C-terminal mNG fusion: ZorD-mNG) were used for subsequent microscopy experiments. **b**, Exemplary denoised TIRF and brightfield microscopy pictures of mNeongreen expression driven by the *EcZorI* native promoter (p-mNG) either untreated, exposed to T4 or Bas24 at an MOI of 5 for 30 min. Scale bar 2  $\mu$ m. **c**, **e**, Exemplary denoised TIRF microscopy pictures of ZorD-mNG either untreated or exposed to increasing Bas24 or T4 MOIs of 1, 5, or 50 for 30 min. **d**, **f**, Statistical comparison of ZorD-mNG maxima between untreated and conditions stated in **c**, **e**. Means derive from at least three independent biological replicates. Scale bar 2  $\mu$ m. Our data in **e** and **f** showed phage T4 infection did not result in a dose-dependent ZorD-mNG response.

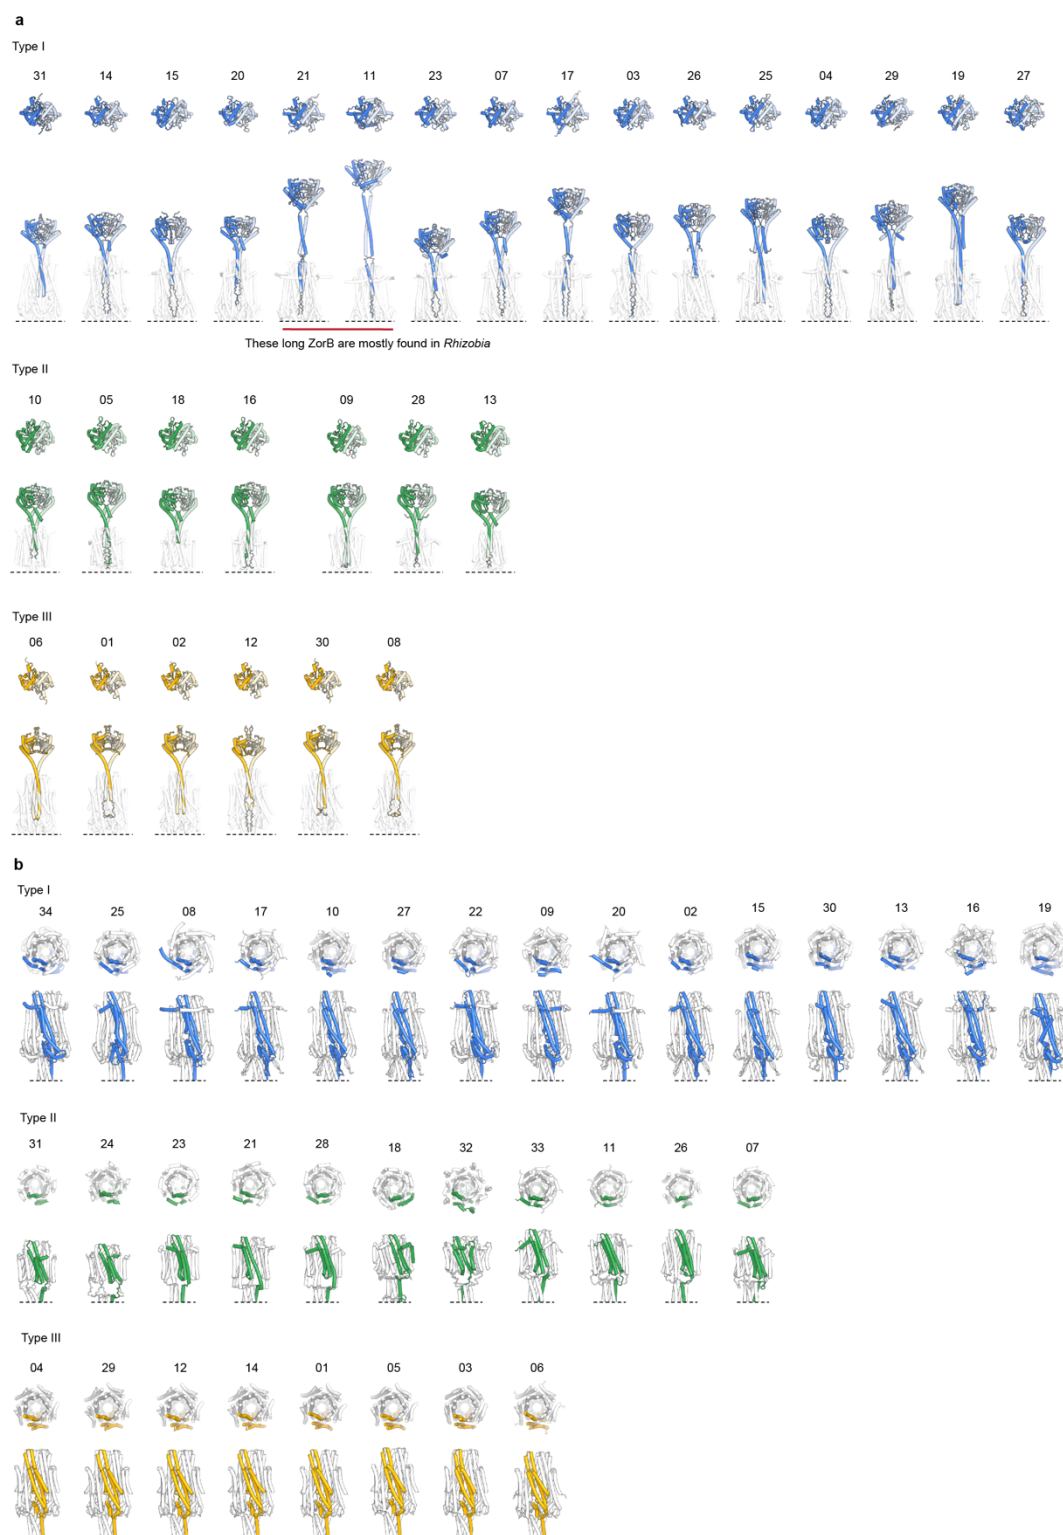

**Extended Data Figure 11. Structural prediction of the representative ZorAB complexes form different Zorya system types. a, The predicted dimerized ZorB PGBDs. b, The predicted ZorAB transmembrane motor complex. One ZorA subunit is highlighted.**

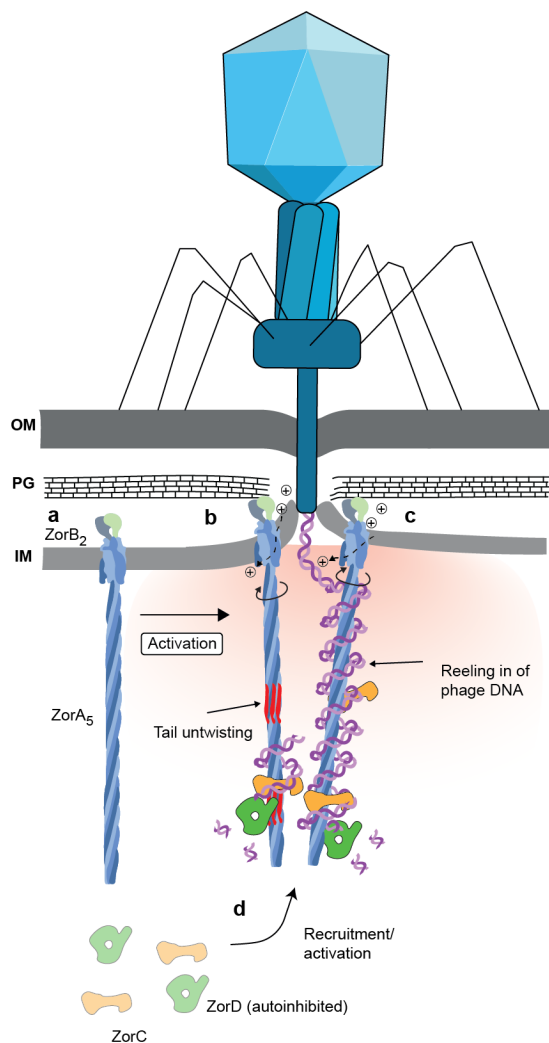

**Extended Data Fig. 12. Proposed ZorA tail untwisting and phage DNA ‘reeling in’ mechanism in the activated Zorya defense system.**

**a**, An inactive ZorAB embedded in the inner membrane. **b**, Phage invasion triggers ZorAB activation. The rotation of ZorA and its long intracellular tail around ZorB causes untwisting of the ZorA tail, which would recruit ZorC and ZorD. **c**, Reeling in of phage DNA around the long ZorA tail in the activated Zorya defense system. Legend Discussion: The ‘reeling in’ mechanism would greatly enhance phage genome localization and sequester it from interactions required for host infection. A typical double-stranded DNA phage genome is 10s of  $\mu\text{m}$  long, and would form a random coil with a radius of gyration similar to the size of the entire cell in the absence of constraints – thus negating any advantage of a localized nuclease defense response at the site of entry. Binding to multiple Zor complexes, perhaps via ZorC and/or D might contribute to localizing phage DNA to the entry site. Unless and until tail rotation is resisted, an almost inevitable consequence of tail rotation combined with DNA binding is that the DNA will wind around the tail like wire on a reel. If ‘reeling in’ of the phage DNA were an essential feature of the Zorya defense mechanism, this would explain the need for both rotation and a long ZorA tail. The length of the ZorA tail is very similar to that of a typical phage capsid into which an entire phage genome can (only just) be tightly packed, indicating that a single Zor complex may be sufficient to capture an entire genome. Rough calculations indicate that 100s of turns would be required to wind a 60 kb Bas24 genome onto a 70 nm tail, allowing the rotary ZorAB motor cumulatively to supply the necessary energy to wind and compact the phage DNA. Reeling would also tighten any loops that might form

210 between DNA sites bound to different ZorA tails, removing any freedom for further ZorA  
211 rotation - as required by the model of activation via untwisting of the ZorA tail.
