# Supplementary material for: Structure and mechanism of the Zorya anti-phage defense system
Source: Research Square preprint supplement (doi:10.21203/rs.3.rs-3768720/v1), 2024-01-04
Supplement: Supplementary file 1 [file fe6e2f7af9e4a4f6544c8611.xlsx]

## Sheet: Zorya_DDA_Quant
Protein information			Zorya / control			Copy number (avg)		Abundance values (MaxLFQ-quantified & normalized, log2 transformed, n=4/4 filtered, total-matrix imputed [down shift 1.8, width 0.15])								Advanced identification info																			Copy number (SD)		Copy number (CV)
Majority protein IDs	Protein names	Gene names	Ratio (log2)	p-value (-log10)	q-value (FDR @ s0=0.25)	Control	Zorya	Control_01	Control_02	Control_03	Control_04	Zorya_01	Zorya_02	Zorya_03	Zorya_04	Peptides	Razor + unique peptides	Unique peptides	Sequence coverage [%]	Unique + razor sequence coverage [%]	Unique sequence coverage [%]	Mol. weight [kDa]	Q-value	Score	Intensity	MS/MS count	Copy number Control_01	Copy number Control_02	Copy number Control_03	Copy number Control_04	Copy number Zorya_01	Copy number Zorya_02	Copy number Zorya_03	Copy number Zorya_04	Control	Zorya	Control	Zorya	LFQ/MW Control_01	LFQ/MW Control_02	LFQ/MW Control_03	LFQ/MW Control_04	LFQ/MW Zorya_01	LFQ/MW Zorya_02	LFQ/MW Zorya_03	LFQ/MW Zorya_04	Median (LFQ/MW)	Copy number (log2-transformation of LB condition, derived from Schmidt et al., Nature Biotechnology, 2016)	MS/MS count Control_01
A7ZI10-10	Zorya protein ZorA	zorA	6.36026	7.75751	0		1243.91	25.3011	25.6697	25.3637	25.9789	32.0277	31.9201	31.9662	31.8403	32	32	32	64.9	64.9	64.9	80.263	0	323.31	144620000000	495					1322.45	1226.54	1266.79	1159.88		68.4482		0.0550265					30.7415	30.634	30.6801	30.5542	30.657		0
A7ZI07-10;A7ZI07	Zorya protein ZorD	zorD	4.28614	6.1303	0		165.355	25.297	25.9012	25.3907	24.9414	29.7717	29.5752	29.715	29.6129	46	46	45	49.3	49.3	48.5	122.74	0	323.31	33532000000	350					177.457	154.641	170.547	158.774		10.512		0.0635726					27.8728	27.6762	27.8161	27.7139	27.765		2
A7ZI09-10;A7ZI09	Zorya protein ZorB	zorB	3.3811	6.04055	0		474.511	25.6383	25.7557	25.4017	25.7907	29.3123	29.0637	28.639	29.0958	10	10	10	43.1	43.1	43.1	28.065	0	154.98	8204700000	85					571.055	479.818	356.418	490.755		88.6167		0.186754					29.5421	29.2935	28.8688	29.3257	29.3096		0
A7ZI08-10	Zorya protein ZorC	zorC	3.29786	6.61554	0		154.99	25.2892	25.2336	25.5712	25.3219	28.9284	28.6958	28.4431	28.5399	27	27	16	57.1	57.1	37.7	65.112	0	323.31	15999000000	175					186.541	158.506	132.801	142.111		23.5657		0.152047					27.9441	27.7115	27.4588	27.5556	27.6335		0
A1AH17;B7MDX1;Q1R5D7;Q0TBX7;P0A6Z8;P0A6Z7;P0A6Z6;C4ZW30;B7NN95;B7NEA8;B7N1R9;B7M2P4;B7L5T4;B6I346;B5YUQ6;B1X7T9;B1J0E9;A8A5T9;A7ZT19;B1LIE4;B7UL33	Nickel-responsive regulator	nikR	1.96815	1.584	0	535.663	546.649	25.5942	25.7416	25.8039	28.3261	28.5877	28.4503	27.9254	28.375	5	5	5	54.9	54.9	54.9	15.094	0	323.31	3184700000	38				535.663	643.348	584.341	404.606	554.301		101.663		0.185975				29.4507	29.7124	29.575	29.05	29.4996	29.4996	9.32643	2
P27294	Protein InaA	inaA	1.34283	1.85964	0	110.883	308.763	26.5314	27.1335	26.8937	26.6516	29.0008	27.8385	27.3059	28.4362	8	8	8	43.5	43.5	43.5	25.296	0	42.131	3927500000	51	90.5004	137.956	116.63	98.447	509.965	225.994	155.656	343.439	21.1035	154.895	0.190322	0.501661	26.911	27.5132	27.2733	27.0313	29.3805	28.2181	27.6856	28.8159	27.5994		2
P78061	Gamma-glutamylputrescine synthetase PuuA	puuA	1.18609	1.14839	0.0332952	60.8656	77.2826	25.4001	25.1666	27.149	26.9148	27.5083	27.7046	27.3177	26.8443	10	10	10	31.1	31.1	31.1	53.177	0	54.405	2492100000	50			65.8446	55.8865	84.6802	97.1536	74.0998	53.1968	7.04144	18.6175	0.115688	0.240902			26.4568	26.2226	26.8161	27.0124	26.6255	26.1521	26.5411		0
P0A980;P0A979;P0A978	Cold shock-like protein CspG	cspG	1.07744	0.451237	0.154706	2284.3	2305	29.4663	25.1625	29.3736	29.4823	29.6472	29.4698	29.3159	29.3616	4	2	2	61.4	35.7	35.7	7.7806	0	21.387	6468200000	45	2324.24		2178.21	2350.44	2638.11	2329.94	2092	2159.93	92.803	243.587	0.0406265	0.105678	31.5469		31.4542	31.5629	31.7278	31.5504	31.3966	31.4422	31.5469	6.71425	5
P30843	Transcriptional regulatory protein BasR	basR	1.02044	1.50902	0.02202	65.8492	99.7607	25.5411	26.062	25.1829	25.3509	27.3124	26.3646	25.8341	26.7075	6	6	6	28.4	28.4	28.4	25.031	0	29.531	1666100000	28		65.8492			158.039	81.3906	56.1375	103.476		43.3996		0.435037		26.4569			27.7073	26.7595	26.229	27.1024	26.7595	4.39232	0
P0ADQ1;P0ADQ0;P0ADP9	Protein YihD	yihD	0.975052	1.12844	0.0420813	1061.96	2416.93	28.8298	28.6068	28.8137	28.7328	30.7037	30.1884	28.6918	29.2994	6	6	6	71.9	71.9	71.9	10.273	0	323.31	20025000000	244	1124.18	961.68	1111.59	1050.4	4174.89	2910.33	1020.63	1561.88	74.2164	1415.94	0.069886	0.585841	30.5095	30.2865	30.4934	30.4126	32.3835	31.8681	30.3715	30.9792	30.5015	11.7997	35
P0ACT0;P0ACS9	HTH-type transcriptional regulator AcrR	acrR	0.974761	0.542305	0.121145	259.068	291.388	28.0045	24.7209	27.7853	28.1906	28.5157	28.1257	28.1243	27.8345	5	5	5	29.3	29.3	29.3	24.766	0	180.81	2586800000	45	259.34		222.437	295.427	370.961	282.317	282.027	230.249	36.4957	58.4228	0.140873	0.200498	28.4147		28.1955	28.6008	28.926	28.536	28.5345	28.2448	28.5345	5.32193	5
P00888	Phospho-2-dehydro-3-deoxyheptonate aldolase, Tyr-sensitive	aroF	0.971477	1.22262	0.0352377	78.4107	122.231	26.942	25.723	26.9457	26.4277	28.2292	27.5886	26.7581	27.3485	11	9	9	45.5	41.9	41.9	38.804	0	95.844	3375700000	39	78.3094		78.512		192.842	123.143	68.8487	104.091	0.143244	52.1711	0.00182684	0.426823	26.7044		26.7081		27.9916	27.351	26.5205	27.1109	26.9095	8.82655	7
Q46948	Protein/nucleic acid deglycase 3	yajL	0.941723	0.894311	0.0599699	292.936	683.795	27.9709	27.7296	28.0929	27.8826	30.043	29.3381	27.6227	28.4391	8	8	8	55.1	55.1	55.1	20.777	0	215.82	10667000000	85	302.478	255.467	329.458	284.343	1290.49	787.828	237.039	419.82	31.1058	464.822	0.106186	0.679768	28.6345	28.3932	28.7565	28.5462	30.7066	30.0017	28.2863	29.1027	28.6955	8.79442	8
Q46919	Uncharacterized protein YqcC	yqcC	0.9374	1.43165	0.034	398.354	828.065	27.8707	27.5811	27.7193	27.4492	29.3734	28.7771	27.742	28.4774	4	4	4	47.7	47.7	47.7	12.786	0	63.016	5315700000	57	460.472	375.973	414.159	342.812	1318.63	868.617	420.806	704.204	50.6435	375.723	0.127132	0.453736	29.2347	28.9451	29.0833	28.8133	30.7374	30.1411	29.106	29.8414	29.1704	8.45943	6
P0AE39;P0AE40;Q8FFE0	Transcriptional regulatory protein YpdB	ypdB	0.931136	0.650962	0.0949174	180.063	214.669	27.512	27.8881	27.6661	24.979	27.8704	28.1362	27.795	27.9681	6	6	6	30.7	30.7	30.7	28.721	0	56.358	2658200000	31	158.173	205.819	176.197		203.291	244.871	192.834	217.681	24.0575	22.5646	0.133606	0.105113	27.7085	28.0846	27.8626		28.0669	28.3327	27.9915	28.1646	28.0669	4.24793	3
Q8XC04;P0C059;P0C058;C4ZYW3;B7UMF3;B7NQY6;B7NF03;B7N2D2;B7MGA7;B7M4H5;B7L830;B6I3R9;B5YX92;B1X9B6;B1LL11;B1IYQ8;A8A6E6;A7ZTP0	Small heat shock protein IbpB	ibpB	0.896249	4.48739	0	182.492	340.298	27.0797	26.7928	26.7165	26.907	27.7202	27.7816	27.7718	27.8074	4	4	4	25.4	25.4	25.4	16.093	0	18.52	3126600000	42	209.787	171.608	162.679	185.896	328.5	342.925	340.582	349.185	20.5558	8.66344	0.112639	0.0254584	28.1119	27.8249	27.7486	27.9392	28.7523	28.8137	28.8039	28.8396	28.4321	9.09276	7
A8A6V1;B1IW61;B1XAK8;B7L9A7;B7M649;C5A020;P21177;B7NFE7;Q8X8I2;Q8FBI2;Q1R466;B7UNH4;B7NV20;B5YY93;B7N2F2;B7MHD1;B6I4I6;B1LM32;A7ZU51;Q0TAL0	Fatty acid oxidation complex subunit alpha	fadB	0.889836	1.43983	0.03192	18.6641	33.0502	24.9183	26.1079	26.2563	26.0915	26.8776	26.8708	26.3909	26.794	15	15	15	29.8	29.8	29.8	79.61	0	98.915	3573500000	96	9.18763	21.1322	23.4463	20.8905	36.223	36.0509	25.7628	34.1641	6.42186	4.94698	0.344075	0.149681	23.6439	24.8335	24.982	24.8171	25.6032	25.5964	25.1165	25.5197	25.0493	9.0954	5
A7ZQJ1;A8A3M6;B1IUT2;B1XCS3;B6I6D7;B7LEG5;B7LXF9;C4ZZQ1;Q46893;Q0TEB1;B5Z3A9;Q8FEJ5;Q1R7U4;B7N6X7;B7UHG6;B7MYQ2;Q8X7Y4;A1AEU1;B7MKM1;B1LQ67;B7NT91	2-C-methyl-D-erythritol 4-phosphate cytidylyltransferase	ispD	0.84945	1.29595	0.0389517	99.5737	177.912	27.0204	26.7188	25.8325	26.9246	27.9465	27.451	26.8963	27.6003	11	11	11	62.7	62.7	62.7	25.737	0	148.64	3734200000	56	125.248	101.407	54.5203	117.119	239.532	169.314	114.825	187.976	31.6238	51.4851	0.317592	0.289385	27.3752	27.0736	26.1872	27.2793	28.3012	27.8057	27.2511	27.9551	27.3272	7.12928	5
P0AAB7;P0AAB6	UTP--glucose-1-phosphate uridylyltransferase	galF	0.827376	1.2091	0.0402368	1497.17	2914.67	30.9753	30.7087	30.9618	30.9961	32.5897	31.7029	30.8559	31.8029	17	17	17	79.5	79.5	79.5	32.829	0	323.31	106240000000	315	1561.58	1295.73	1546.85	1584.52	4835.85	2599.01	1436.32	2787.52	135.181	1413.3	0.0902913	0.484891	30.9789	30.7124	30.9654	30.9997	32.5934	31.7065	30.8595	31.8065	30.9893	12.2556	28
A7ZVT5;B7LEN9;P0A882;P0A881;B7NW74;B7NH68;B7LXV6;C4ZT75;B6I6P1;B5Z4S5;B1XFK3;B1IS26;A8A8C2;Q1R248;A1AJW2;B1LEK0;B7MNK2;B7N2W3;B7UR23;Q0T8R8;Q8FA42	Trp operon repressor	trpR	0.824264	1.58996	0.0329032	368.096	692.119	27.5116	27.4816	27.5851	27.4225	28.9625	28.4912	27.6338	28.2103	7	7	7	69.4	69.4	69.4	12.355	0	37.925	6226900000	85	370.724	363.034	390.302	348.324	1023.86	736.074	403.853	604.685	17.4792	259.954	0.0474856	0.375591	28.9251	28.8951	28.9986	28.836	30.376	29.9047	29.0473	29.6238	29.0229	7.07682	9
P76273;C4ZZJ2;B1XHA3	Ribosomal RNA small subunit methyltransferase F	rsmF	0.820524	0.664099	0.0981219	84.2899	106.166	27.6812	27.4148	25.3298	27.3949	28.3114	27.6859	27.9221	27.1836	9	9	1	29.6	29.6	3.1	53.227	0	70.696	3622500000	45	95.4879	79.2388		78.1429	148.441	95.7972	113.031	67.3945	9.71322	33.8874	0.115236	0.319193	26.9877	26.7213		26.7014	27.6178	26.9923	27.2286	26.49	26.9877	6.08746	5
P42604	Altronate dehydratase	uxaA	0.808522	1.72609	0.0261655	28.4164	35.5704	25.9734	25.5623	25.0487	25.2611	26.5751	26.2421	25.853	26.4093	9	9	9	21	21	21	54.092	0	47.64	1159000000	29	28.4164				43.3055	34.2997	26.1191	38.5573		7.296		0.205114	25.2566				25.8583	25.5253	25.1362	25.6924	25.5253		3
P0AF96	Toxin-antitoxin biofilm protein TabA	tabA	0.804893	1.86849	0.0231789	571.802	1032.35	28.4322	28.5272	28.8268	28.4982	29.852	29.4919	28.8119	29.3481	8	8	8	78.7	78.7	78.7	16.865	0	247.68	15788000000	160	515.803	551.274	679.94	540.19	1393.83	1083.22	672.874	979.464	73.5986	297.363	0.128714	0.288046	29.3968	29.4918	29.7914	29.4627	30.8166	30.4565	29.7765	30.3127	29.7839	13.6275	17
A1AET8;Q1R7U7;Q0TEB4;P0A842;P0A841;P0A840;C4ZZP8;B7UHG3;B7NT88;B7MZ45;B7MKL8;B7LXF6;B7LEG2;B6I6D4;B5Z3A6;B1XCS0;B1IUT5;A8A3M3;A7ZQI8;B7N6X4	5/3-nucleotidase SurE	surE	0.791005	1.80924	0.024352	118.596	214.909	27.0318	26.9483	26.9972	27.0456	28.3815	27.8983	27.2566	27.6505	7	7	7	47.8	47.8	47.8	26.9	0	74.83	4039800000	74	120.74	113.88	117.851	121.913	310.645	221.471	141.324	186.195	3.57766	71.7582	0.0301668	0.333901	27.3228	27.2392	27.2882	27.3366	28.6725	28.1893	27.5476	27.9415	27.4421	7.74819	8
Q0TEN0;P0A7T5;P0A7T4;P0A7T3;C4ZYM7;B7UH58;B7NSA8;B7N6J5;B7MYP8;B7MIU7;B7M978;B7LDJ8;B6I631;B5Z228;B1XBT1;B1LPB6;B1IVM4;A8A3B6;A7ZQ49	Small ribosomal subunit protein bS16	rpsP	0.782418	1.34808	0.0410159	76575	136390	34.1798	34.799	34.6825	35.0078	36.1712	35.3275	34.9709	35.3292	6	6	6	58.5	58.5	58.5	9.1904	0	323.31	737430000000	353	53268.1	82179.3	75739.6	95113.1	214783	118977	92685.4	119114	17502.2	53718.9	0.228563	0.393863	36.0202	36.6394	36.5229	36.8482	38.0116	37.1679	36.8113	37.1696	36.8297	17.0596	36
A7ZV98;A8A7X5;B1ISY2;B1XDW8;B7LCT1;B7M9I1;B7MLN1;C4ZR95;P0A744;Q8XCG3;B5Z3H5;B1LRA3;B6I2D2;B7MTA1;B7NGF6;B7NUD2;Q0T9G6;B7UQN3;Q8FAG4	Peptide methionine sulfoxide reductase MsrA	msrA	0.778375	1.30263	0.0413371	193.297	355.449	27.5801	27.4909	27.4874	27.4278	28.8121	28.5493	27.3659	28.3724	6	6	6	55.2	55.2	55.2	23.315	0	112	5484800000	54	204.793	192.394	191.921	184.082	485.22	403.67	176.267	356.637	8.55928	130.733	0.0442804	0.367797	28.0774	27.9882	27.9847	27.9252	29.3095	29.0467	27.8632	28.8697	28.0328	9.51175	2
P0A9B1;P0A9B0;P0A9A9	Ferric uptake regulation protein	fur	0.772512	1.62501	0.0317189	3800.39	6711.25	31.5954	31.2292	31.1251	31.1086	32.5537	32.1431	31.4392	32.0123	6	6	6	41.2	41.2	41.2	16.795	0	323.31	87029000000	234	4743.93	3670.97	3412.98	3373.68	9279.46	6960.95	4252.54	6352.05	642.696	2068.2	0.169113	0.308169	32.566	32.1997	32.0956	32.0791	33.5242	33.1136	32.4098	32.9829	32.4879	13.3918	21
P0A9F1;P0A9F2;Q8X7U4	Transcriptional regulator MntR	mntR	0.764853	0.90295	0.0767882	127.572	209.497	27.0119	26.4796	25.3709	26.6799	27.7229	27.1097	26.5508	27.2183	7	7	7	43.9	43.9	43.9	17.64	0	166.78	3562800000	62	182.349	125.612	57.8002	144.527	299.988	195.27	132.038	210.693	52.1534	69.2634	0.408815	0.330617	27.9117	27.3793	26.2707	27.5796	28.6227	28.0094	27.4506	28.118	27.7456	7.8009	5
P37182	Hydrogenase 2 maturation protease	hybD	0.760348	1.99843	0.0244667	774.896	1328.69	28.726	29.076	29.3498	29.1293	30.2346	29.8357	29.455	29.7973	6	6	6	32.9	32.9	32.9	17.751	0	70.762	11287000000	64	601.674	768.741	931.208	797.959	1730.06	1308.53	1002.37	1273.78	135.412	300.556	0.174748	0.226206	29.6167	29.9667	30.2405	30.02	31.1252	30.7264	30.3457	30.688	30.2931	5.2854	7
P0AAN4;P0AAN3	Hydrogenase maturation factor HypB	hypB	0.75419	2.17361	0.0231	489.959	826.937	28.869	29.5579	29.3292	29.2115	30.2392	30.1403	29.7212	29.8835	12	12	12	66.9	66.9	66.9	31.565	0	287.09	23757000000	159	371.819	602.281	513.174	472.563	970.453	905.509	675.267	756.519	95.5945	135.072	0.195107	0.16334	28.9293	29.6181	29.3895	29.2717	30.2995	30.2006	29.7815	29.9438	29.6998	6	21
A1A9B8;Q1RE41;Q0TJG8;P0A8Q8;P0A8Q7;P0A8Q6;C4ZY53;B7NM96;B7NAN2;B7MRT8;B7MHI7;B7M809;B7LD74;B6I8V2;B5YSH7;B1X822;B1LKM9;B1IWP1;A7ZYI5;A7ZJU9;B7UMX3	ATP-dependent Clp protease adapter protein ClpS	clpS	0.74512	0.900064	0.076526		201.462	25.9471	25.3284	25.4296	26.1737	27.5085	26.3617	25.8048	26.1841	6	6	6	63.2	63.2	63.2	12.179	0	34.36	1099400000	29					375.342	168.156	113.859	148.492		118.073		0.586079					28.9427	27.7959	27.239	27.6183	27.7071		2
P0AGK6;P0AGK5;P0AGK4	RNA-binding protein YhbY	yhbY	0.728977	1.60427	0.0352583	3149.27	5293.83	30.4604	29.9585	30.2785	30.6888	31.1859	31.5073	30.5914	31.0176	7	7	7	74.2	74.2	74.2	10.784	0	256.05	62726000000	228	3352.49	2359.15	2951.64	3933.79	5571.4	6977.44	3674.45	4952.03	663.357	1372.44	0.210638	0.259254	32.0701	31.5682	31.8882	32.2985	32.7956	33.117	32.2011	32.6273	32.2498	9.27612	32
P0A9T7;P0A9T6	Uncharacterized HTH-type transcriptional regulator YbaQ	ybaQ	0.728487	0.938311	0.0759716	180.92	234.768	25.0872	26.5018	26.5642	26.6667	27.2698	27.0012	26.7432	26.7196	6	6	6	54.9	54.9	54.9	13.171	0	43.622	2233900000	41		171.375	179.036	192.35	293.417	243.114	202.93	199.61	10.6136	43.8143	0.0586646	0.186628		27.823	27.8855	27.9879	28.591	28.3224	28.0644	28.0408	28.0408	3.90689	3
P0AB63;P0AB62;P0AB61	Protein YciN	yciN	0.725371	2.12856	0.0259059	2951.3	5005.96	30.2199	30.0567	29.9779	30.0462	31.2072	30.6989	30.3755	30.9205	6	6	6	85.5	85.5	85.5	9.3855	0	205.08	29509000000	122	3259.54	2907.7	2751.53	2886.41	6507.04	4558.52	3634.91	5323.39	216.819	1215.72	0.0734657	0.242855	32.0299	31.8668	31.788	31.8563	33.0173	32.509	32.1856	32.7306	32.1078	11.0355	13
P52007	Protein YecM	yecM	0.723464	1.42274	0.0430061	190.26	333.689	27.3047	27.399	27.3389	27.3078	28.7737	28.031	27.4518	27.9878	9	9	9	72.9	72.9	72.9	21.205	0	144.79	5484500000	97	185.859	198.547	190.367	186.266	519.846	309.046	206.027	299.838	5.88789	132.546	0.0309466	0.397213	27.9389	28.0332	27.9731	27.942	29.4079	28.6652	28.086	28.622	28.0596	8.45943	9
P0AD51;P0AD50;P0AD49	Ribosome-associated factor Y	yfiA	0.715608	2.0132	0.0262815	11181.8	18668.6	32.1028	32.5267	32.5296	32.5027	33.5198	32.9656	32.7884	33.2504	10	10	10	77.9	77.9	77.9	12.784	0	323.31	302200000000	662	8915.17	11995.9	12020.1	11796.2	24044.2	16311.4	14408.2	19910.7	1514.44	4248.41	0.135438	0.22757	33.467	33.891	33.8938	33.867	34.8841	34.3299	34.1527	34.6146	34.0232	13.803	64
Q8FIP6;Q1RD70;Q0TIY7;P58626;P0A729	7-methyl-GTP pyrophosphatase	yceF	0.708253	1.72655	0.0326341	1743.51	2931.83	30.2882	30.4404	30.6492	30.7084	31.7815	31.2141	30.8394	31.0842	4	4	4	17.5	17.5	17.5	21.638	0	17.737	19810000000	45	1470.69	1635.98	1893.63	1973.73	4183.96	2812.3	2163.35	2567.7	232.039	876.6	0.133087	0.298994	30.8933	31.0454	31.2543	31.3134	32.3865	31.8192	31.4445	31.6892	31.3789	11.8364	4
P06610	Thioredoxin/glutathione peroxidase BtuE	btuE	0.704918	1.15056	0.0547424	296.016	517.098	27.958	28.074	27.8778	27.744	29.2663	28.8941	27.7968	28.5162	6	6	6	42.6	42.6	42.6	20.469	0	75.742	8130500000	73	304.316	330.063	287.709	261.975	760.576	586.119	271.843	449.854	28.6117	207.137	0.096656	0.400576	28.6431	28.7591	28.563	28.4291	29.9514	29.5793	28.482	29.2014	28.7011	9.79766	10
B7UJV9;Q8X4W4;Q8FD57;Q1R6B4;Q0TCP0;P0A8W0;C4ZSW4;B7NKT7;B7N0Z9;B7MBY8;B7M0T8;B7LHT2;B6I1U4;B1XHJ9;B1IQQ3;A1AGC0;B7NDK4	HTH-type transcriptional repressor NanR	nanR	0.703904	2.31879	0.0254769	153.17	254.381	27.4833	27.5675	27.3327	27.6204	28.6451	28.0571	28.1216	27.9957	13	13	10	56.7	56.7	48.7	29.507	0	319.21	11338000000	151	150.855	160.01	135.758	166.057	340.261	225.446	235.86	215.957	13.1835	57.8273	0.0860711	0.227325	27.6409	27.725	27.4902	27.778	28.8026	28.2147	28.2792	28.1532	27.9656	7.65821	25
P05827	HTH-type transcriptional regulator IlvY	ilvY	0.701296	0.909054	0.0749407	65.3082	83.9142	26.4079	25.0056	26.5327	26.4299	26.9439	26.8391	26.3776	27.0206	6	6	6	25.3	25.3	25.3	33.204	0	34.933	1504900000	24	63.0625		68.8217	64.0405	91.783	85.2859	61.7405	96.8473	3.08178	15.5213	0.0471883	0.184967	26.3951		26.5199	26.4171	26.9311	26.8263	26.3649	27.0079	26.5199	5.39232	3
P64601;P64600;P64599	Ubiquinone biosynthesis accessory factor UbiT	ubiT	0.700672	1.02026	0.0672935	103.467	183.36	26.375	26.6113	26.1058	26.3012	27.9772	27.0479	26.3789	26.792	8	8	8	57.5	57.5	57.5	19.672	0	75.34	2130100000	62	104.568	123.388	86.6067	99.3041	321.055	167.503	104.853	140.029	15.2713	95.3107	0.147597	0.519801	27.1174	27.3538	26.8482	27.0436	28.7196	27.7904	27.1213	27.5345	27.2375	6.22882	5
P30749	Molybdopterin synthase catalytic subunit	moaE	0.698748	0.941008	0.0764043	598.214	1062.46	28.9364	28.5671	28.5172	28.5522	30.1534	29.5541	28.3956	29.2648	9	9	8	84.7	84.7	84	16.981	0	188.89	14327000000	118	729.073	562.968	543.666	557.149	1709.38	1123.6	499.288	917.559	87.6131	503.458	0.146458	0.473862	29.891	29.5217	29.4719	29.5069	31.1081	30.5088	29.3503	30.2194	29.7064	8.92184	17
P21866	KDP operon transcriptional regulatory protein KdpE	kdpE	0.696529	1.43075	0.0396384	39.6286	67.0288	24.9426	25.928	25.3032	25.3556	26.4554	26.1033	26.0982	25.6586	8	8	7	45.8	45.8	37.3	25.362	0	15.082	1146500000	31				39.6286	85.588	66.8864	66.6475	48.9935		14.943		0.222934				25.7316	26.8313	26.4792	26.4741	26.0346	26.4741	5.90689	1
A7ZZJ6;B1ITJ5;B1XBK9;C4ZTV3;P0A877;Q8FHW0;B7L492;B7LY16;B6I9X4;A7ZL78;Q1RCA7;B7UR66;B7ML76;A1AAN0;B7MU99;Q0TIB0;B5YZP0;B7NVN0;Q8X7B5;B1LH32;B7N473	Tryptophan synthase alpha chain	trpA	0.694777	1.14403	0.0561691	198.559	337.443	28.1437	27.6312	27.9493	27.5409	29.147	28.755	27.8165	28.3256	10	10	10	58.2	58.2	58.2	28.724	0	89.448	5699600000	88	246.128	171.917	214.803	161.386	496.864	377.598	195.741	279.567	39.2355	129.688	0.197601	0.384325	28.34	27.8275	28.1456	27.7372	29.3433	28.9513	28.0129	28.522	28.2428	10.7356	12
P76206	Uncharacterized protein YdiY	ydiY	0.686535	0.710443	0.10272	158.382	186.334	25.6158	27.358	27.4196	27.5833	27.8724	27.4421	27.6804	27.7279	5	5	5	33.7	33.7	33.7	27.607	0	33.948	2750100000	47		147.793	154.304	173.05	211.867	156.76	185.223	191.487	13.1129	22.7618	0.0827926	0.122156		27.6116	27.6731	27.8369	28.1259	27.6957	27.934	27.9815	27.8369	5.42626	4
A7ZR59;B6I775;P60652;P60651;B7N7I9;B7LYW6;B7LFJ6;C5A0K6;B5YQD4;B1XF99;B1LDE6;B1IT67;A8A477;Q1R791;A1AFC5;B7MMC5;B7MZN5;B7NI01;B7UHY3;Q0TDR4;Q8FE36	Agmatinase	speB	0.68457	1.31512	0.0474108	1308.3	2219.74	30.6312	30.8994	30.6445	30.823	32.0451	31.6863	30.8312	31.1738	9	9	9	47.7	47.7	47.7	33.557	0	323.31	80571000000	332	1200.4	1448.31	1211.62	1372.87	3230.39	2512.69	1380.75	1755.11	122.146	821.993	0.0933624	0.370311	30.6032	30.8713	30.6165	30.795	32.0171	31.6583	30.8031	31.1458	30.8372	11.245	40
Q8X6V9;Q8CW88;Q1RE95;P75797;A1A968;Q0TJL8	Glutathione-binding protein GsiB	gsiB	0.683743	0.938741	0.0755834	23.6678	38.4229	26.0051	25.1948	25.7289	25.7728	27.0581	26.5282	25.4731	26.3772	6	6	6	15.4	15.4	15.4	56.413	0	86.681	1115200000	39				23.6678	58.2047	40.1643	19.1881	36.1343		16.0163		0.416844				24.9954	26.2806	25.7508	24.6957	25.5997	25.5997		4
P30748	Molybdopterin synthase sulfur carrier subunit	moaD	0.680043	1.00292	0.074897	418.948	715.468	27.4058	26.808	27.4214	27.0316	28.675	27.8182	27.1412	27.7526	4	4	4	85.2	85.2	85.2	8.7578	0	65.962	3754100000	58	487.372	320.673	492.717	375.029	1185.12	650.49	404.946	621.315	85.0696	331.704	0.203055	0.463619	29.3158	28.7179	29.3314	28.9415	30.5849	29.7281	29.0512	29.6626	29.3236	10.2773	11
A7ZN00;P67826;B1XHE2;B6I1F2;B7M2G5;C4ZQF8;B7L7S7;A1AC35;A8A176;B1J0L4;B5YR19;B7MW68;B7USQ1;Q0TGV9;Q1RAR0;Q8FGQ2;Q8XCH4;B7MBT3;B7NS44;B1LCZ7;B7NBM5	PF03932 family protein CutC	cutC	0.674559	1.23565	0.0485739	128.137	218.089	27.2541	27.0531	27.0862	27.0328	28.5323	27.814	27.1688	27.6093	8	8	8	41.5	41.5	41.5	26.761	0	128.81	7152500000	99	141.815	123.196	126.083	121.454	347.028	209.881	133.594	181.852	9.31664	91.5521	0.0727084	0.419793	27.5526	27.3516	27.3846	27.3312	28.8307	28.1125	27.4673	27.9078	27.5099	6.52356	8
P77475	Fructose-1-phosphate phosphatase YqaB	yqaB	0.670281	1.47682	0.0413243	414.934	690.979	28.3977	28.4986	28.3252	28.4627	29.6278	29.3023	28.5119	28.9233	7	7	7	61.7	61.7	61.7	20.78	0	304.67	10715000000	125	407.783	437.611	387.581	426.761	964.817	768.192	441.727	589.181	22.0109	226.155	0.0530469	0.327297	29.0611	29.162	28.9886	29.1261	30.2912	29.9657	29.1753	29.5867	29.1687	8.43045	18
P64588	Transcriptional regulator YqjI	yqjI	0.668727	2.56421	0.0252	325.436	524.467	28.2487	28.0846	28.281	28.3596	28.8934	28.8827	28.6351	29.2376	12	12	12	58.5	58.5	58.5	23.401	0	195.28	12502000000	147	325.838	290.474	333.279	352.154	511.721	507.916	427.06	651.174	25.8062	93.0578	0.0792971	0.177433	28.7407	28.5766	28.773	28.8517	29.3854	29.3748	29.1271	29.7296	28.9894	7.12928	18
Q8VWE6;P36771	Probable HTH-type transcriptional regulator LrhA	lrhA	0.660264	1.42229	0.0410047	177.316	284.888	27.6222	28.3153	27.7822	27.954	28.9666	28.845	28.1064	28.3967	8	8	8	32.7	32.7	32.7	34.561	0	60.584	7360800000	96	141.721	230.24	158.521	178.783	363.265	333.62	198.914	243.751	38.3984	76.5976	0.216553	0.268869	27.5516	28.2447	27.7116	27.8834	28.896	28.7744	28.0358	28.3262	28.1403	5.45943	12
A7ZT33;B7L5X8;P68568;P68567;C4ZW44;B7NEC8;B7M2Q7;B7NNB9;B6I359;B5YUS8;B1X7V2;B1LIG5;B1J0D5;A8A5V4;Q8FCL1;A1AH34;B7MEJ2;B7N1D6;B7UL45;Q0TBW6;Q1R5B9	Ribosomal RNA small subunit methyltransferase J	rsmJ	0.658511	1.54912	0.0425529	97.7835	158.997	26.8223	26.6517	26.9101	26.5092	27.7992	27.5372	26.8025	27.3885	8	8	8	48.4	48.4	48.4	26.919	0	62.963	4066500000	87	104.189	92.4621	110.799	83.6841	206.475	171.875	102.761	154.876	12.0767	43.2025	0.123504	0.27172	27.1122	26.9417	27.2001	26.7992	28.0891	27.8272	27.0925	27.6784	27.1562	6.37504	8
P03007	DNA polymerase III subunit epsilon	dnaQ	0.655495	1.93648	0.0315077	96.2786	154.172	26.5424	26.9648	26.7054	26.628	27.6216	27.2022	26.9993	27.6395	6	6	5	30	30	29.6	27.099	0	26.754	2885400000	43	85.076	114.349	95.3616	90.3282	181.111	135.028	117.144	183.405	12.7577	33.2557	0.132508	0.215705	26.8228	27.2451	26.9858	26.9083	27.9019	27.4825	27.2796	27.9199	27.2624	5.12928	7
P0A6F0;P0A6E9	ATP-dependent dethiobiotin synthetase BioD 2	bioD2	0.655167	1.63864	0.0412067	378.681	611.318	28.3546	28.8074	28.5198	28.5104	29.6354	29.2011	28.6938	29.2827	10	10	10	40.3	40.3	40.3	24.981	0	73.403	16718000000	157	328.511	451.05	368.79	366.371	805.385	594.189	416.547	629.151	51.6513	159.384	0.136398	0.260721	28.7524	29.2052	28.9176	28.9082	30.0332	29.5988	29.0915	29.6805	29.1483	3.45943	13
P37028;Q8CWD2;Q8X8Z0	Vitamin B12-binding protein	btuF	0.653793	1.30653	0.0495813	38.9194	56.1036	25.7438	25.3081	25.539	24.8976	26.4102	26.1665	25.4898	26.0372	5	5	5	27.4	27.4	27.4	29.366	0	27.049	1262100000	35	44.8465	33.0556	38.856		71.5091	60.2928	37.5408	55.072	5.8957	14.1482	0.151485	0.25218	25.9082	25.4725	25.7035		26.5746	26.331	25.6543	26.2016	25.9082	4.64386	6
A7ZHK8;B7M160;P0A8E6;P0A8E5;C4ZRL2;B7UIG7;B7NI79;B7MBA2;B7N7Y9;B7LFY6;B6HZ94;B5YZF4;B1XC94;B1IQM1;A7ZW68;B7MNY1;Q8FL40;Q0TLL5	UPF0231 protein YacL	yacL	0.651178	1.03379	0.0751905	1010.41	1696.34	29.2032	29.2267	29.0804	28.9436	30.1893	30.1831	28.8375	29.8488	5	5	5	54.2	54.2	54.2	13.941	0	179.93	18731000000	136	1072.64	1090.43	984.221	894.357	2139.41	2130.06	830.309	1685.57	90.239	614.965	0.0893092	0.362526	30.4425	30.466	30.3196	30.1829	31.4286	31.4223	30.0767	31.088	30.4542	7.97728	21
A7ZWF4;B1IPU6;B1LHM1;B1XD76;B5Z0I6;B7NKW6;C4ZRU9;P0AC84;P0AC85;B7MBI8;Q0TLC5;B7UJA8;B7N874;B7MQ21;Q8FKY7;B7M211;B7LHB8;B6HZS5;Q1RFX9;A1A7Q3;A7ZHU8	Hydroxyacylglutathione hydrolase	gloB	0.650725	1.63285	0.0416774	206.976	336.842	27.7205	27.9351	27.934	27.9313	29.107	28.4245	28.1113	28.4809	6	6	6	34.3	34.3	34.3	28.464	0	121.01	6436100000	62	184.703	214.639	214.478	214.082	487.614	302.377	242.833	314.543	14.8504	105.286	0.0717494	0.312567	27.93	28.1445	28.1434	28.1408	29.3165	28.634	28.3208	28.6903	28.2326	8.11894	10
Q1RCS3;Q0TIK2;P0A736;P0A735;P0A734;C4ZS91;B7UQ59;B7NJG8;B7N3X8;B7MTV2;B7MK71;B7LX87;B7LGT2;B6I9N3;B5YXJ7;B1XA61;B1LHZ3;B1IUB7;A7ZZA8;A7ZKU5;A1AA98	Cell division topological specificity factor	minE	0.650441	1.86077	0.0376089	2825.53	4561.6	30.1482	30.0553	30.1589	30.1969	31.1452	30.7985	30.2726	30.9448	8	8	8	86.4	86.4	86.4	10.235	0	105.95	37297000000	180	2840.22	2661.38	2861.68	2938.86	5708.46	4478.2	3098.8	4960.92	117.347	1098.71	0.0415308	0.240861	31.8333	31.7404	31.844	31.882	32.8303	32.4836	31.9577	32.6298	31.9199	11.9672	19
A8A445;B7LYG8;Q0TDU8;P0A6U0;P0A6T9;C5A0H6;B7UHV2;B7N7E7;B7NHW5;B7LF90;B6I737;B5YQ96;B1XEJ1;B1LDA4;B1IT98;Q8FE66;A1AF93;B7MM90;B7MZ56;A7ZR13	Glycine cleavage system H protein	gcvH	0.647989	1.80061	0.0381143	370.683	595.162	27.4625	27.7	27.7	27.8045	28.7344	28.3627	27.8529	28.3088	5	5	5	31	31	31	13.811	0	201.94	6333300000	51	320.079	377.992	377.976	406.685	779.871	601.169	420.709	578.901	36.3481	147.028	0.0980569	0.247039	28.7153	28.9528	28.9527	29.0573	29.9872	29.6155	29.1057	29.5616	29.0815	10.0835	6
P0ABU1;P0ABU0	1,4-dihydroxy-2-naphthoyl-CoA synthase	menB	0.647426	1.86342	0.0367913	2094.95	3385.11	31.309	31.3598	31.3498	31.3465	32.4893	32.0212	31.6033	31.841	12	12	12	54.7	54.7	54.7	31.633	0	323.31	132900000000	433	2048.01	2122.12	2107.27	2102.38	4679.7	3371.96	2516.53	2972.25	32.3956	931.13	0.0154637	0.275066	31.3662	31.417	31.4069	31.4036	32.5465	32.0784	31.6605	31.8982	31.5387	10.3026	53
P0ADV6;P0ADV5	Luciferase-like monooxygenase	yhbW	0.640224	1.24746	0.0570975	111.792	178.87	27.6931	27.05	27.4882	27.232	28.4214	28.0627	27.3464	28.1936	9	9	9	31.6	31.6	31.6	37.129	0	42.918	5392200000	71	138.536	88.309	120.015	100.308	230.682	179.449	108.675	196.673	22.1071	51.4105	0.197752	0.287419	27.5192	26.876	27.3142	27.058	28.2475	27.8888	27.1724	28.0197	27.4167	7.07682	5
P0AA27;P0AA26;P0AA25	Thioredoxin 1	trxA	0.63931	2.47179	0.026419	17298.9	27368.1	32.9955	32.9292	32.8336	32.9752	33.7866	33.6745	33.1892	33.6404	5	5	5	55	55	55	11.806	0	323.31	296510000000	476	18051.2	17231.4	16116.7	17796.5	31408.9	29037.5	20673	28353.1	859.397	4651.5	0.0496791	0.16996	34.4746	34.4082	34.3127	34.4543	35.2657	35.1536	34.6683	35.1195	34.5715	14.6796	83
P0AEN6;P0AEN5;P0AEN4	Cell division protein FtsL	ftsL	0.638282	2.07009	0.0328588	290.498	458.649	27.3105	27.3692	27.0644	27.4466	28.1428	27.8825	27.5499	28.1686	5	5	4	51.2	51.2	43	13.627	0	42.275	4631200000	65	291.697	303.93	245.517	320.846	522.393	435.368	344.916	531.918	32.281	87.3857	0.111123	0.190529	28.5826	28.6413	28.3365	28.7187	29.4149	29.1546	28.822	29.4407	28.7703	6.20945	4
P19624;C4ZPX8;B1XC53;B7N7S7;B7L4H5;Q8FL95;B7NHF8;B1LFY8;B7MNR1;P58713;B7M0E9;B6HZ33;B5YZ90;B1IRC4;A7ZW04;A7ZHE5	4-hydroxythreonine-4-phosphate dehydrogenase	pdxA	0.635983	1.89239	0.0360085	115.427	181.792	27.2778	27.1993	27.6361	27.2511	28.3128	27.9661	27.5789	28.0504	10	10	10	55.3	55.3	55.3	35.113	0	120.79	5436600000	79	109.589	103.727	140.835	107.556	226.192	177.447	135.305	188.224	17.1122	37.3838	0.148252	0.205641	27.1844	27.1059	27.5427	27.1577	28.2194	27.8727	27.4855	27.9569	27.5141	7.47573	7
A8A586;P15770;B1IQ18;B1X6D4;C4ZUD6;B7UK05;A1AGH3;B1LGN8;B7MC45;B7NDQ3;B7NLK0;Q8X8F9;Q1R651;B5YT01;Q0TCI0;A7ZSH0;B6I1Z5;B7LHX9;B7M0Y7;B7N0S2;Q8FD18	Shikimate dehydrogenase (NADP(+))	aroE	0.632593	1.23946	0.0574592	258.529	423.842	28.3395	28.2303	28.1669	28.2504	29.527	29.0138	28.2473	28.7293	9	9	9	44.1	44.1	44.1	29.413	0	215.63	11706000000	122	275.608	255.322	244.234	258.951	632.969	441.919	258.377	362.105	12.9937	158.378	0.05026	0.373672	28.5016	28.3924	28.329	28.4126	29.6891	29.176	28.4094	28.8915	28.4571	7.7879	14
P37642	Inner membrane protein YhjD	yhjD	0.631939	0.660783	0.123661	68.5994	68.8333	25.994	26.7633	26.674	24.8583	27.0939	26.6232	26.4764	26.6238	7	7	7	23.4	23.4	23.4	37.911	0	54.452	1494400000	17		70.7441	66.4546		89.1663	64.1356	57.8703	64.1608	3.03319	13.8747	0.044216	0.201569		26.5593	26.47		26.8898	26.4192	26.2724	26.4198	26.4449	5.75489	1
A1A8B3;B7MDA3;Q8FKA4;Q1RF91;Q0TKJ7;P77756;C4ZTK1;B7NJ50;B7N8Z8;B7MQG0;B7M3T7;B7L681;B6HZQ1;B1XFN2;B1LJK1;B1J004;A7ZXA2;A7ZIK2;Q8XE52;B5Z3V1;B7UJR7	7-cyano-7-deazaguanine synthase	queC	0.629393	1.04989	0.0779228	378.514	621.234	28.4952	28.6655	28.7967	28.3364	29.9021	29.2837	28.4681	29.1575	9	9	9	45.5	45.5	45.5	25.452	0	177.4	17926000000	193	355.707	400.766	439.309	318.273	952.567	617.793	349.031	565.544	52.7265	249.659	0.139299	0.401876	28.866	29.0363	29.1675	28.7072	30.2729	29.6545	28.8389	29.5283	29.1019	9.10591	19
P69229;P69228	Transcriptional regulatory protein BaeR	baeR	0.628304	1.19	0.0616699	165.611	269.583	27.7086	27.4925	27.4359	27.4375	28.7193	28.2258	27.4142	28.2284	12	12	12	53.8	53.8	53.8	27.656	0	323.31	8627700000	135	188.573	162.098	155.795	155.978	382.666	270.857	153.446	271.363	15.5859	93.5953	0.0941118	0.347186	27.9596	27.7435	27.6869	27.6885	28.9703	28.4768	27.6652	28.4794	27.8515	7.55459	14
Q1RG60;Q0TLK2;P0C7I4;P0A792;P0A791;P0A790;C4ZRM4;B7UIH9;B7NI91;B7N801;B7MNZ3;B7MBB4;B7M172;B7LGJ3;B6HZA6;B5YZG7;B1XCA6;B1LGT2;B1IQK9;A7ZW80;A7ZHM0;A1A7H7	Aspartate 1-decarboxylase	panD	0.627512	1.01209	0.0763749	2353.16	3902.26	30.3537	30.2661	30.1552	30.4638	31.6684	31.0243	30.1424	30.9138	5	5	4	27	27	26.2	13.834	0	36.033	29989000000	69	2419.2	2275.17	2105.25	2613.04	6073.02	3868.81	2086.39	3580.83	215.592	1644.59	0.0916181	0.421445	31.6041	31.5164	31.4056	31.7142	32.9187	32.2747	31.3927	32.1642	31.6592	9.08215	9
P0AFX2;P0AFX1;P0AFX0	Ribosome hibernation promoting factor	hpf	0.623577	1.21883	0.0602715	1015.98	1629.15	29.0435	28.6525	28.5988	28.6622	29.8985	29.3635	28.6951	29.4942	4	4	4	71.6	71.6	71.6	10.75	0	101.5	12515000000	95	1247.09	948.461	913.437	954.931	2269.31	1560.31	977.169	1709.79	155.149	531.077	0.152709	0.325985	30.6577	30.2667	30.213	30.2765	31.5128	30.9777	30.3093	31.1084	30.4835	10.9593	12
P0AFR5;P0AFR4	Uncharacterized protein YciO	yciO	0.623273	1.82655	0.0355857	544.277	843.458	28.5913	29.1741	28.9665	29.0813	29.9191	29.4882	29.2838	29.6151	9	9	9	51.5	51.5	51.5	23.211	0	220.43	19450000000	112	417.583	627.994	543.038	588.492	1058.03	782.458	678.133	855.208	91.3169	160.452	0.167776	0.190231	29.0951	29.6779	29.4703	29.5851	30.4229	29.9919	29.7876	30.1189	29.7327	10.0875	7
A7ZVX8;B7N7Q4;Q8XA41;C4ZPV6;B7NHD4;P22564;B7M0C6;B7L4F2;B5YYC2;B1XBF5;B6HYX8;A7ZHB9;P0C0W2;A1A778;B7MAF0;B7MNN5;Q0TLW1;Q1RGH2	Non-specific ribonucleoside hydrolase RihC	rihC	0.623059	0.905215	0.0870167	1226.13	2038.79	30.3521	30.8859	30.4219	30.7411	32.1437	31.1455	30.6317	30.9723	8	8	0	26	26	0	32.545	0	239.03	38972000000	138	1018.29	1479.79	1069.33	1337.11	3569.82	1774.69	1238.56	1572.1	219.428	1044.34	0.178959	0.512237	30.3682	30.9021	30.4381	30.7572	32.1598	31.1616	30.6479	30.9885	30.8297	10.2491	12
P32662;P58422;Q8FCW0	Phosphoglycolate phosphatase	gph	0.622256	1.35833	0.0477946	283.232	448.286	28.5528	28.0147	28.3268	28.1506	29.3871	28.7908	28.355	29.0011	12	12	12	57.5	57.5	57.5	27.389	0	138.58	13903000000	144	343.906	235.943	293.582	259.499	616.76	406.258	299.421	470.704	46.8612	132.682	0.165451	0.295975	28.8178	28.2797	28.5918	28.4156	29.6521	29.0558	28.62	29.2661	28.7189	9.78463	19
P33030	Zinc chaperone YeiR	yeiR	0.620906	2.12706	0.0326	282.307	442.758	28.5728	28.6121	28.7086	28.7768	29.687	29.216	28.9637	29.2873	14	14	14	52.1	52.1	52.1	36.113	0	159.5	20572000000	214	263.769	271.124	290.079	304.256	575.458	413.791	346.805	434.978	18.3565	96.1176	0.0650231	0.217088	28.4389	28.4782	28.5747	28.6428	29.5531	29.082	28.8298	29.1533	28.7363	6.52356	25
P0AEF6;P0AEF5;P0AEF4	Transcriptional regulatory protein DpiA	dpiA	0.618389	1.16069	0.0660483	93.9265	151.11	26.5373	26.7693	26.6697	26.3655	27.7286	27.377	26.4686	27.2411	9	9	9	71.2	71.2	71.2	25.453	0	85.307	3516400000	60	90.3117	106.236	99.0804	80.0781	207.966	162.58	86.0699	147.823	11.2978	50.3493	0.120284	0.333197	26.9081	27.14	27.0404	26.7363	28.0994	27.7477	26.8394	27.6119	27.0902	0	4
P33590	Nickel-binding periplasmic protein	nikA	0.617866	1.65122	0.0407549	374.57	593.408	29.6879	29.8356	29.7447	29.8267	30.8441	30.3654	29.8791	30.4778	28	28	26	69.8	69.8	68.9	58.718	0	323.31	45120000000	430	352.398	390.802	366.71	388.372	791.782	566.293	402.888	612.672	18.3243	159.955	0.0489208	0.269553	28.8527	29.0004	28.9095	28.9915	30.0089	29.5301	29.0439	29.6426	29.0221		46
P25745;B1XA43;B1IUD4;A7ZZ88;A7ZKS3;Q8X735;B1LI10;Q1RD20;Q0TIU0;A1AA27;Q8CXZ8	tRNA-specific 2-thiouridylase MnmA	mnmA	0.616698	1.48812	0.0458933	979.094	1557.44	30.5843	30.502	30.6948	30.7192	31.747	31.3934	30.7248	31.102	14	14	14	47.6	47.6	47.6	40.959	0	323.31	99587000000	331	949.783	896.583	1026.15	1043.86	2143.6	1673.56	1047.92	1364.69	68.4985	466.843	0.0699612	0.29975	30.2687	30.1864	30.3792	30.4036	31.4314	31.0778	30.4092	30.7864	30.4064	9.26913	38
P0ACU8;P0ACU7	HTH-type transcriptional regulator YjdC	yjdC	0.615958	1.24599	0.0604242	151.531	244.073	27.2742	26.9455	27.054	26.947	28.3982	27.4712	27.2619	27.5532	6	6	6	36.1	36.1	36.1	21.931	0	27.916	3148800000	38	175.848	139.698	150.729	139.85	386.305	201.856	174.349	213.783	17.0139	96.2484	0.11228	0.394342	27.8598	27.5311	27.6396	27.5327	28.9839	28.0568	27.8476	28.1388	27.8537	8.33539	5
A7ZSH9;B7M0Z6;P0A743;P0A742;C4ZUE5;B7NLL0;B7NDR2;B7UK14;B6I204;B5YT10;B1X6E2;B1LGP7;B1IQ09;A8A595;Q1R642;A1AGI2;B7MCQ6;B7N0T1;Q0TCH1;Q8FD11;B7LHZ2	Large-conductance mechanosensitive channel	mscL	0.613308	0.888602	0.0902762	786.343	1261.92	29.2542	28.5163	28.9583	28.5911	30.1492	29.4938	28.6641	29.4659	6	6	6	37.5	37.5	37.5	14.957	0	45.332	10462000000	90	1035.35	617.607	841.605	650.814	1937.43	1224.5	684.947	1200.81	193.129	514.569	0.245604	0.407766	30.3919	29.654	30.096	29.7288	31.2869	30.6316	29.8019	30.6037	30.244	10.6952	13
P07109	Histidine transport ATP-binding protein HisP	hisP	0.61162	0.819298	0.0964514	82.6154	130.228	27.1742	26.3369	26.0959	26.4775	27.982	26.8843	26.663	27.0016	6	6	5	27.2	27.2	24.1	28.653	0	29.469	1540700000	33	125.154	69.6399	58.8246	76.8435	220.335	102.162	87.5021	110.912	29.3098	60.8431	0.354774	0.467205	27.3741	26.5368	26.2958	26.6774	28.1819	27.0842	26.8629	27.2015	26.9735	4.70044	3
P0AB16;P0AB15;P0AB14	Uncharacterized protein YccJ	yccJ	0.610976	1.78012	0.0423607	1642.44	2577.58	29.0832	29.174	28.9971	29.1476	30.1455	29.7876	29.2685	29.6442	4	4	4	72	72	72	8.5244	0	119.41	10524000000	92	1620.86	1727.23	1526.03	1695.66	3410.09	2654.16	1845.37	2400.7	89.5158	649.705	0.0545016	0.25206	31.0321	31.1229	30.946	31.0966	32.0944	31.7365	31.2174	31.5932	31.1701	12.0126	13
A7ZW53;B1IR77;B1XC78;B5YZD7;B6HZ79;B7LFX0;B7M143;C4ZRJ6;P36680;Q8X988;B7N7X3;Q1RG94;Q0TLN8;B7UIF1;B7NHK6;A7ZHJ3;B7MNV9;B7MAM4;B1LG38;Q8FL56;A1A7E5	Cell division protein ZapD	zapD	0.610727	1.36766	0.0500034	998.504	1588.77	29.9269	30.2633	30.1066	30.1701	31.3661	30.7373	30.358	30.4484	11	11	11	50.2	50.2	50.2	28.291	0	323.31	46094000000	242	871.059	1102.36	987.852	1032.74	2385.94	1536.26	1177.99	1254.88	97.1503	553.311	0.0972959	0.348264	30.1452	30.4815	30.3249	30.3883	31.5843	30.9556	30.5763	30.6666	30.5289	9.11374	27
P0AGG6;P0AGG5;P0AGG4	Thioredoxin 2	trxC	0.610219	0.948301	0.0879556	187.559	312.333	26.9586	26.7766	26.9451	26.7925	28.4017	27.2322	26.8899	27.3899	4	4	4	33.8	33.8	33.8	15.555	0	13.502	3374000000	52	199.466	175.598	197.598	177.573	547.854	241.592	190.107	269.778	12.7196	160.442	0.0678166	0.513688	28.0398	27.8578	28.0264	27.8737	29.4829	28.3135	27.9712	28.4711	28.0331	8.61838	8
Q0TG79;P0A8M8;P0A8M7;P0A8M6;C4ZQR6;B7UT45;B6I833;B5YTE1;B1LP36;B1IZQ6;A8A1N0;A7ZNH9	UPF0265 protein YeeX	yeeX	0.608676	0.728697	0.114916	5317.68	8632.23	31.8191	31.1753	31.4405	30.8418	32.7573	32.179	31.1099	31.6652	12	12	12	66.1	66.1	66.1	12.778	0	323.31	73984000000	307	7312.5	4659.39	5609.73	3689.11	14104.3	9408.07	4450.79	6565.8	1543.82	4175.31	0.290318	0.483689	33.184	32.5403	32.8054	32.2068	34.1222	33.5439	32.4749	33.0301	32.9178	13.8844	35
B1X6B7;B7L8Y4;C4ZQN7;P31658;B1LQP2;Q1RAH5;B7NBV8;B7MCM0;B7MWF3;B1IZU5;A8A1G6;A1ACB2;P59331;A7ZN88;B6I112;B7M3A5;B5YSJ3;Q8XB78;B7NRB5;Q0TGM8	Protein/nucleic acid deglycase HchA	hchA	0.608603	0.823577	0.0967875	263.061	441.036	28.4009	28.5091	28.133	28.3614	29.8576	29.0191	28.1001	28.862	9	9	9	33.9	33.9	33.9	31.19	0	91.652	12147000000	100	271.172	292.511	224.784	263.777	751.93	418.04	219.67	374.505	28.2766	224.063	0.107491	0.508039	28.4784	28.5866	28.2105	28.4389	29.9351	29.0966	28.1776	28.9396	28.5325	9.72792	11
P77181	Phenylacetic acid degradation protein PaaY	paaY	0.608385	1.28285	0.0590992	355.093	543.292	28.6819	28.0459	28.2251	27.8622	29.1724	28.322	28.8008	28.9535	8	8	7	51.5	51.5	45.4	21.324	0	36.849	4657300000	41	484.728	310.541	352.053	273.052	683.352	376.745	526.815	586.255	92.2498	128.416	0.25979	0.236366	29.308	28.672	28.8513	28.4883	29.7985	28.9481	29.4269	29.5796	29.128	3.70044	5
P27859	3-5 ssDNA/RNA exonuclease TatD	tatD	0.607985	1.05931	0.0759935	72.3837	115.626	26.5552	26.1848	26.6296	26.207	27.6002	27.1218	26.2729	27.0137	4	4	4	16.5	16.5	16.5	28.974	0	13.278	1823500000	50	80.233	61.9024	84.5244	62.8751	166.759	119.296	65.8446	110.603	11.6802	41.358	0.161365	0.357689	26.7391	26.3686	26.8135	26.3909	27.784	27.3056	26.4568	27.1975	26.7763	4.64386	4
Q1R8P2;Q0TEZ2;P69933;P69932;P69931;C4ZX71;B7UGN4;B7NQN5;B7N678;B7MYC3;B7MHX7;B7M7K0;B7LCN6;B6I568;B5Z033;B1XAX1;B1LNE6;B1IWG4;A8A2Y8;A7ZPT9;A1ADY9	DnaA regulatory inactivator Hda	hda	0.606849	1.707	0.0419362	56.254	85.9812	25.8436	25.9732	26.2328	25.5789	26.7111	26.5078	26.1322	26.7049	8	8	8	33.5	33.5	33.5	26.632	0	16.019	1674900000	53	53.0803	58.1245	69.7092	44.102	97.4363	84.5073	64.9659	97.0156	10.6815	15.2402	0.18988	0.177251	26.149	26.2787	26.5382	25.8843	27.0165	26.8132	26.4376	27.0103	26.4879	2.80735	6
P52061;Q8FE27;Q8XCU5	dITP/XTP pyrophosphatase	rdgB	0.606182	1.07973	0.07744	631.549	1019.34	29.0723	28.8859	28.9991	29.1875	30.2768	29.5693	28.909	29.8144	8	8	8	56.3	56.3	56.3	21.039	0	133.09	14530000000	68	645.812	566.781	613.556	700.05	1500.88	914.608	576.026	1085.84	56.0192	384.622	0.0887011	0.377324	29.7178	29.5314	29.6446	29.833	30.9223	30.2148	29.5545	30.4599	29.7754	10.0553	10
P22525	Probable L,D-transpeptidase YcbB	ycbB	0.604517	1.9772	0.037352	41.5281	64.3958	26.8274	26.7666	26.9833	26.7777	27.7042	27.4277	27.0056	27.6355	15	15	15	38.5	38.5	38.5	67.812	0	157.02	3808200000	65	41.1218	39.4094	45.8649	39.7163	75.9816	62.6045	46.5876	72.4094	2.98573	13.1503	0.0718966	0.204211	25.7844	25.7237	25.9403	25.7347	26.6613	26.3847	25.9627	26.5925	25.9515	5.55459	7
P75792	Sugar phosphatase YbiV	ybiV	0.602767	1.15579	0.0712866	176.449	283.776	27.6961	27.8021	27.6375	27.8568	29.0555	28.432	27.7886	28.1275	11	11	10	50.6	50.6	50.2	30.412	0	275.77	11164000000	159	169.829	182.906	163.007	190.053	439.903	284.293	181.193	229.715	12.2646	112.282	0.069508	0.395671	27.8101	27.916	27.7515	27.9707	29.1694	28.5459	27.9026	28.2415	27.9434	6.56986	23
P67082;P67081;P67080	Pyridoxal phosphate homeostasis protein	yggS	0.598435	1.4976	0.0474101	452.573	709.895	29.0006	28.8409	28.7862	28.7939	30.0065	29.313	29.0089	29.4868	14	14	14	84.2	84.2	84.2	25.787	0	197.79	28386000000	233	500.064	447.182	430.358	432.688	1011.36	622.352	503	702.869	32.5239	217.102	0.0718644	0.305823	29.3525	29.1929	29.1381	29.1458	30.3585	29.665	29.3609	29.8387	29.3567	8.21432	35
Q8X5J3;Q1RFI6;Q0TKS6;P0AAP4;P0AAP3;B1LIP2;B1J084;A7ZX05;A7ZIA5;A1A836	Transcriptional repressor FrmR	frmR	0.595366	1.70398	0.0407733	1104.36	1719.46	28.7166	28.8092	28.8302	28.8818	29.9327	29.3596	29.072	29.2549	4	4	4	52.7	52.7	52.7	10.318	0	147.31	10982000000	81	1033.96	1103.21	1119.54	1160.75	2422.6	1621.86	1326.12	1507.26	52.8137	484.312	0.0478228	0.281665	30.39	30.4826	30.5036	30.5552	31.6061	31.033	30.7455	30.9283	30.6504	9.11374	12
A7ZV87;B7M9H2;Q8XCH9;Q0T9H5;P69506;B7NGE7;B7MLM2;C4ZR85;B7LCS2;B6I2C2;B5Z3G5;B1XDV9;B1ISZ1;A8A7W5;Q1R342;A1AJC0;B1LR94;B7MSU8;B7NUC3;B7UQM4;Q8FAH0	Iron-sulfur cluster repair protein YtfE	ytfE	0.594229	0.854895	0.0960014	1283	2107.35	30.2415	30.4686	30.1871	30.2656	31.6759	30.9979	30.0025	30.8635	9	9	9	56.4	56.4	56.4	24.882	0	35.043	16167000000	73	1236.04	1449.05	1189.82	1257.09	3374.25	2099.03	1045.57	1910.56	114.21	961.111	0.0890179	0.456075	30.645	30.8721	30.5906	30.6691	32.0793	31.4014	30.406	31.267	30.7706	6.12928	7
Q1R3Y9;Q0TAD5;P0A8R2;P0A8R1;P0A8R0;C5A096;B7UNP9;B7NU76;B7NFM8;B7MR18;B7MI61;B7M6Y0;B7LA26;B6I4S2;B5YZ69;B1XB95;B1LNN4;B1IVF0;A8A735;A7ZUE4	Regulator of ribonuclease activity A	rraA	0.594054	1.18809	0.0667897	915.948	1454.17	29.3953	29.2311	29.3648	29.1733	30.4994	30.0262	29.2672	29.748	5	5	5	47.8	47.8	47.8	17.36	0	67.049	11844000000	127	983.208	876.448	962.455	841.682	2129.97	1529.22	898.871	1258.62	67.7312	519.272	0.0739465	0.357092	30.3181	30.154	30.2877	30.0962	31.4222	30.949	30.19	30.6709	30.3029	10.9076	18
P25906	Pyridoxine 4-dehydrogenase	pdxI	0.592677	0.420909	0.244026	68.2623	158.555	26.3321	26.8136	26.3123	26.0691	28.1772	27.2826	25.2947	27.1434	8	8	7	36.4	36.4	36.4	30.706	0	27.813	2344100000	38	64.7184	90.6665	63.8288	53.8356	235.542	125.909		114.213	15.73	66.9288	0.230434	0.422118	26.4321	26.9137	26.4124	26.1692	28.2772	27.3827		27.2434	26.9137	8.43045	3
P0AFW1;P0AFW0;Q8FBI4;Q0TAL4	Transcription antitermination protein RfaH	rfaH	0.587933	0.346921	0.314724	340.918	321.489	28.2172	27.7605	25.1709	27.8667	28.1136	27.2662	27.9691	28.0182	5	5	5	46.3	46.3	46.3	18.34	0	231.95	3829200000	66	407.686	296.104		318.963	379.151	209.479	342.668	354.658	58.9418	76.2013	0.172892	0.237026	29.0608	28.6041		28.7103	28.9572	28.1097	28.8127	28.8618	28.8127	6.2854	6
P0AF04;P0AF03	Molybdopterin adenylyltransferase	mog	0.587406	1.7582	0.0401889	998.196	1529.48	29.8165	29.5504	29.8286	29.6102	30.5773	30.3122	29.8176	30.4483	8	8	8	44.6	44.6	44.6	21.222	0	173.21	27142000000	98	1077.95	894.72	1087.15	932.97	1836.29	1525.25	1078.75	1677.63	98.7157	326.216	0.0988941	0.213285	30.4495	30.1834	30.4617	30.2432	31.2103	30.9453	30.4506	31.0813	30.4561	7.49985	11
P0A915	Outer membrane protein W	ompW	0.585045	1.02825	0.0801396	2201.53	3385.53	30.5733	31.0727	30.7238	31.3059	31.8149	31.3694	30.8792	31.9523	5	5	5	40.1	40.1	40.1	22.928	0	323.31	67795000000	352	1693.51	2402.37	1881.73	2828.53	4039.66	2957.06	2098.06	4447.36	514.4	1064.04	0.233655	0.314291	31.0947	31.5941	31.2453	31.8274	32.3364	31.8909	31.4007	32.4738	31.7108	7.5157	26
A7ZYY6;B1X9E7;B6I9A9;B7M907;C4ZRX4;P75913;Q1RDC8;B7LFE3;Q8X9K1;B7MIH3;B5YVQ3;B1IV68;A1A9T1;Q8FIT1;B7N3I0;B1LIY1;B7MTG4;B7NLA1;B7UP47;Q0TJ41	Glyoxylate/hydroxypyruvate reductase A	ghrA	0.584987	0.823855	0.0994961	158.8	258.966	27.9357	27.8961	27.5517	27.8489	29.2053	28.5837	27.5615	28.222	13	13	13	60.9	60.9	60.9	35.315	0	107.59	9363500000	101	172.705	167.983	131.989	162.523	420.082	271.852	132.897	211.033	18.3517	121.539	0.115565	0.469325	27.834	27.7945	27.45	27.7473	29.1036	28.482	27.4598	28.1203	27.8142	10.4336	11
P0A6Y7;P0A6Y6;P0A6Y5;C4ZUQ6;B7UKA5;B7NMG4;B7NE05;B7N133;B7MDM6;B7M1V3;B7L4S8;B1X748;B1LHJ8	33 kDa chaperonin	hslO	0.583681	0.957157	0.087371	1193.36	1903.94	30.6019	30.4808	30.8256	30.3628	31.8898	31.3589	30.5956	30.7614	13	13	13	63.4	63.4	63.4	32.534	0	323.31	52543000000	218	1213.34	1114.7	1419.12	1026.3	2989.51	2061.49	1208	1356.76	168.782	813.846	0.141434	0.427453	30.6185	30.4974	30.8423	30.3794	31.9064	31.3756	30.6122	30.7781	30.6983	12.4398	25
P77318	Uncharacterized sulfatase YdeN	ydeN	0.581688	1.04276	0.0795019	23.4903	36.1835	26.0993	26.0123	25.3913	26.0561	27.1428	26.2274	26.0786	26.4371	10	10	10	32.5	32.5	32.5	62.801	0	162.63	3040000000	82	26.6917	25.1138	16.259	25.8968	55.4189	29.1959	26.3069	33.8124	4.86372	13.1909	0.207052	0.364555	25.1671	25.0801	24.4591	25.124	26.2106	25.2952	25.1464	25.5049	25.1568	7.19967	7
P0AEW5;P0AEW4	3,5-cyclic adenosine monophosphate phosphodiesterase CpdA	cpdA	0.581537	0.90646	0.0912302	138.392	224.598	27.2611	27.4421	27.4891	27.5085	28.8771	27.9275	27.333	27.8894	4	4	4	19.6	19.6	19.6	30.938	0	29.53	4267100000	43	123.092	139.714	144.389	146.372	381.579	196.269	129.439	191.105	10.5752	108.969	0.0764146	0.485172	27.3503	27.5313	27.5783	27.5978	28.9663	28.0167	27.4222	27.9786	27.588	7.65105	6
P02930	Outer membrane protein TolC	tolC	0.578728	1.61225	0.0448957	2224.96	3413.17	32.2865	32.0757	32.292	32.0993	33.2318	32.7253	32.3293	32.7821	29	29	29	78.1	78.1	78.1	53.74	0	323.31	307940000000	1097	2377.2	2051.08	2386.37	2085.18	4607.81	3232.04	2449.6	3363.24	181.662	892.736	0.0816472	0.261556	31.5791	31.3683	31.5846	31.3919	32.5244	32.0179	31.6219	32.0747	31.6033	12.6847	135
A0A140N5J7;P67653;P0ABZ5;P0ABZ4	3-deoxy-D-manno-octulosonate 8-phosphate phosphatase KdsC	kdsC	0.577553	1.38235	0.0565613	878.359	1362.84	29.3416	29.3824	29.5011	29.5249	30.5961	29.8472	29.5598	30.0571	4	4	4	33	33	33	20.015	0	165.05	13124000000	71	820.1	843.889	917.013	932.434	1973.97	1168.44	955.472	1353.47	54.7738	438.676	0.0623593	0.321884	30.0591	30.0999	30.2186	30.2424	31.3136	30.5647	30.2773	30.7746	30.2598	8.55075	4
A7ZV31;B7M8S3;Q0T9N1;P0A8K3;P0A8K2;P0A8K1;C5A1F4;B7NG97;B7MSX5;B7LC21;B6I267;B5Z2G9;B1XDR4;B1LQI3;B1IT43;A8A7Q7;B7MKW7;Q1R397;B7NTL9;B7UPY0	Phosphatidylserine decarboxylase proenzyme	psd	0.576519	1.40096	0.0566295	620.553	960.238	29.7749	29.6736	29.7944	29.8985	30.9109	30.3874	29.8629	30.2864	14	14	14	60.6	60.6	60.6	35.934	0	231.86	51749000000	287	615.053	572.961	623.534	670.663	1362.47	944.419	654.149	879.916	40.0631	295.626	0.0645604	0.307867	29.6481	29.5469	29.6677	29.7718	30.7841	30.2606	29.7361	30.1596	29.7539	10.878	32
P68688	Glutaredoxin 1	grxA	0.573875	1.35676	0.0605054	638.282	960.645	28.1818	27.856	27.5195	28.0983	28.9882	28.3903	28.2321	28.3404	5	5	5	62.4	62.4	62.4	9.6847	0	46.521	4457800000	36	757.993	603.417	476.734	714.984	1333.18	877.179	785.207	847.014	125.867	251.29	0.197196	0.261584	29.9466	29.6208	29.2843	29.8632	30.7531	30.1552	29.997	30.1052	29.9718	7.36632	4
P0AE89;P0AE88	Transcriptional regulatory protein CpxR	cpxR	0.573214	1.34357	0.0603319	773.097	1190.86	29.6977	29.5004	29.7384	29.6599	30.5287	30.4664	29.5704	30.3238	13	13	12	53	53	53	26.312	0	323.31	38311000000	205	798.267	695.297	821.376	777.45	1428.38	1367.38	730.222	1237.47	54.8823	317.246	0.0709902	0.2664	30.0205	29.8233	30.0613	29.9828	30.8516	30.7892	29.8933	30.6467	30.0409	9.77314	24
A7ZR24;Q1R7B4;Q0TDT7;P0A8S3;P0A8S2;P0A8S1;C5A0I6;B7UHW2;B7N7G1;B7MZ67;B7MMA1;B7LYT3;B7LFH3;B6I748;B5YQA9;B1XEK1;B1LDC0;B1IT87;A8A456;B7NHX5	HTH-type transcriptional regulator ArgP	argP	0.570752	1.10134	0.0754474	195.552	305.355	28.0985	27.8771	28.1815	27.9668	29.2215	28.5319	27.9517	28.7019	12	12	11	41.4	41.4	34.3	33.471	0	235.51	12474000000	160	204.33	174.989	216.558	186.329	448.533	276.769	184.363	311.754	18.4949	109.54	0.0945781	0.358731	28.0742	27.8528	28.1572	27.9425	29.1972	28.5076	27.9273	28.6776	28.1157	8.61102	13
B7M603;B7L959;B6I4E0;Q8XAP3;P06983;C4ZZ69;B7NFA7;B1XAH2;Q8FBP1;B7NTE0;B7N295;B7MH66	Porphobilinogen deaminase	hemC	0.567133	1.26849	0.0658395	620.328	960.3	29.7412	29.6558	29.745	29.6614	30.8358	30.2804	29.6807	30.275	13	13	12	61.3	61.3	54	33.864	0	199.51	34127000000	199	637.804	600.82	639.512	603.176	1372.6	930.374	611.382	926.843	21.1993	312.917	0.0341744	0.325853	29.7	29.6147	29.7038	29.6203	30.7947	30.2392	29.6396	30.2338	29.7019	9.5157	23
P09030	Exodeoxyribonuclease III	xthA	0.565808	1.08828	0.0786687	1251.51	1943.17	30.4705	30.4684	30.7814	30.5562	31.7159	31.1006	30.4577	31.2656	14	14	14	65.3	65.3	65.3	30.969	0	323.31	70122000000	306	1163.24	1161.51	1446.14	1235.14	2781.9	1808.26	1152.82	2029.71	134.212	671.769	0.10724	0.345708	30.5583	30.5562	30.8692	30.644	31.8036	31.1884	30.5454	31.3534	30.7566	9.7039	40
P0A946;P0A945;P0A944	[Ribosomal protein bS18]-alanine N-acetyltransferase	rimI	0.562002	1.15561	0.0761957	302.711	468.185	27.6767	27.4865	27.7668	27.652	28.8103	28.3058	27.6103	28.1035	5	5	5	36.5	36.5	36.5	16.61	0	124.34	5255200000	95	308.64	270.143	328.728	303.335	682.558	479.445	294.619	416.118	24.3112	162.192	0.0803115	0.346427	28.6633	28.473	28.7533	28.6385	29.7969	29.2924	28.5969	29.09	28.7083	5.78136	10
Q8FL55;P0A6J0;P0A6I9	Dephospho-CoA kinase	coaE	0.560987	1.00487	0.0887279	88.764	109.306	26.3039	26.3201	25.2581	26.4115	26.891	26.621	26.4724	26.5532	4	4	4	30.1	30.1	30.1	22.676	0	43.559	1290700000	29	86.1893	87.1719		92.9307	130.007	107.615	96.9796	102.623	3.6418	14.4684	0.0410279	0.132366	26.8413	26.8575		26.9489	27.4284	27.1584	27.0098	27.0906	27.0098	5.97728	2
P32669;Q8FBA7;P58424	Fructose-6-phosphate aldolase 2	fsaB	0.559735	0.937916	0.091582	72.9507	115.532	26.0425	26.2419	26.0316	26.1558	27.4963	26.638	26.0585	26.518	6	6	6	46.8	46.8	46.8	23.555	0	35.437	1452200000	38	69.0703	79.4187	68.5437	74.77	191.128	104.796	69.8489	96.3556	5.15183	52.5507	0.0706207	0.454858	26.5251	26.7245	26.5142	26.6383	27.9788	27.1205	26.5411	27.0006	26.6814		5
P0ABE0;P0ABD9;P0ABD8	Biotin carboxyl carrier protein of acetyl-CoA carboxylase	accB	0.552048	1.50355	0.0547462	10818.8	16022	32.8959	32.8554	32.863	32.3799	33.5049	33.2822	32.871	33.5443	6	6	6	43.6	43.6	43.6	16.687	0	105.47	118460000000	126	11868.8	11537	11599.1	8270.42	18179.5	15555.6	11664.1	18688.8	1705.04	3213.28	0.157599	0.200555	33.8757	33.8353	33.8429	33.3598	34.4847	34.2621	33.8509	34.5242	33.8633	12.5703	16
B1IZ50;B6I851;Q9S5G4;P10371;C4ZSB3;B7NQG6;B7MDH8;B7M403;B7NC64;B5YU80;B1X6W1;B1LP17;A8A1P8;A7ZNJ6;A1ACN6;Q1RA49;B7L9Q1;B7MWU2;B7UT61;Q0TG63;Q8FG49	1-(5-phosphoribosyl)-5-[(5-phosphoribosylamino)methylideneamino] imidazole-4-carboxamide isomerase	hisA	0.551736	1.62503	0.046701	166.021	247.647	27.2991	27.3577	27.3942	27.6725	28.297	27.9733	27.5339	28.1261	7	7	6	47.8	47.8	41.6	26.013	0	116.65	3016300000	43	150.604	156.907	160.971	195.601	302.881	241.463	177.517	268.726	20.176	53.0774	0.121527	0.214327	27.6385	27.697	27.7336	28.0118	28.6364	28.3127	27.8733	28.4655	27.9426	9.22882	3
P0A869;P0A868;P0A867	Transaldolase A	talA	0.549717	1.07773	0.0823174	187.9	281.397	28.2696	28.2194	27.6079	28.0934	29.1315	28.5599	28.0661	28.6315	17	15	15	63.6	53.2	53.2	35.658	0	181.74	13493000000	181	216.064	208.605	135.948	190.982	395.069	264.77	187.38	278.37	36.1958	85.7247	0.192633	0.30464	28.154	28.1038	27.4922	27.9777	29.0159	28.4443	27.9505	28.5159	28.1289	9.89633	20
A1AJ83;Q1R382;Q0T9L5;P0AF65;P0AF64;P0AF63;C4ZR55;B7UQI7;B7NTN4;B7NGB2;B7MSJ6;B7MLI3;B7M8T8;B7LC37;B6I282;B1XDS9;B1LQJ8;B1IT28;A8A7S3;A7ZV48;B5Z2I4	HTH-type transcriptional repressor NsrR	nsrR	0.548949	1.6529	0.0470835	332.75	493.988	27.4572	27.6732	27.9213	27.6824	28.6348	28.2345	27.8983	28.1624	6	6	6	56.7	56.7	56.7	15.593	0	81.798	5564300000	49	282.116	328.173	390.43	330.28	643.415	486.142	384.193	462.2	44.4142	108.713	0.133476	0.220072	28.5349	28.7509	28.999	28.7601	29.7125	29.3122	28.976	29.2401	28.9875	7.08746	6
P0AE54;P0AE53;P0AE52	Putative peroxiredoxin bcp	bcp	0.547176	1.16557	0.0767768	3299.53	5025.5	30.9458	31.0807	31.2495	31.2866	32.3327	31.653	31.2219	31.5437	14	14	14	87.2	87.2	87.2	17.634	0	323.31	113770000000	466	2865.71	3149.52	3544.81	3638.09	7567.67	4701.9	3476.8	4355.63	358.466	1771.49	0.108642	0.352501	31.846	31.9809	32.1498	32.1869	33.233	32.5532	32.1221	32.444	32.1683	12.9138	50
P31069	Voltage-gated potassium channel Kch	kch	0.547006	1.74658	0.045389	80.01	119.13	27.2334	27.3761	27.2087	27.0425	28.2038	27.654	27.4818	27.7092	4	4	4	15.3	15.3	15.3	46.062	0	92.4	3099600000	30	80.7623	89.245	79.3765	70.656	159.322	108.412	96.0995	112.686	7.6103	27.7019	0.0951169	0.232535	26.7484	26.8911	26.7237	26.5575	27.7188	27.169	26.9968	27.2242	26.9439	6.26679	4
Q8FJZ8;P0ABP4;P0ABP3	Anaerobic C4-dicarboxylate transporter DcuC	dcuC	0.543276	1.86089	0.038959	178.548	256.698	27.9871	28.7445	28.4715	28.4503	29.0025	28.9317	28.9444	28.9478	6	6	6	18.7	18.7	18.7	48.412	0	166.88	9222700000	86	130.178	221.226	182.743	180.045	265.026	252.223	254.462	255.079	37.3312	5.68642	0.209082	0.0221522	27.4303	28.1877	27.9147	27.8935	28.4457	28.375	28.3876	28.391	28.2813		8
A1AEB0;B7LDH3;Q1R8F2;P12295;C4ZYK3;B7MIR5;B7M8J5;B7UH19;B6I5F5;B1XBQ7;B1LP93;B1IVP7;A8A392;A7ZQ25;Q0TEQ8;B7NRN6;Q8FF08;B5Z154;B7N6H1;Q8X444;B7MYL3	Uracil-DNA glycosylase	ung	0.542991	1.32471	0.0677333	439.153	663.586	28.7913	28.7184	28.8788	28.8429	29.8518	29.4565	28.8116	29.2834	15	15	14	87.3	87.3	77.3	25.681	0	323.31	25170000000	294	433.71	412.12	461.105	449.678	911.329	690.978	439.934	612.106	21.2373	195.617	0.0483596	0.294787	29.1492	29.0763	29.2367	29.2008	30.2097	29.8144	29.1695	29.6413	29.2187	7.59991	36
P77554	Uncharacterized protein YahJ	yahJ	0.54151	2.06722	0.0436677	40.1825	59.1811	26.3898	26.5316	26.3388	26.2022	27.2317	26.9507	26.6594	26.7867	10	10	10	37	37	37	50.548	0	107.67	2818400000	44	40.7293	44.9827	39.302	35.716	73.4361	60.3215	49.1901	53.7768	3.83255	10.5441	0.0953786	0.178166	25.7707	25.9126	25.7198	25.5831	26.6126	26.3316	26.0403	26.1676	25.9764	3	3
A7ZHN7;B7LGK8;P0A824;P0A823;C4ZRN9;B7N815;B7M187;B7NIA9;B6HZC1;B5YZI3;B1XCC1;B1LGU8;B1IQJ4;A7ZW93;Q1RG44;A1A7J2;B7MBC9;B7MP08;B7UIJ0;Q0TLI5;Q8FL24	Sugar fermentation stimulation protein A	sfsA	0.540897	0.742943	0.123688	79.1836	91.6121	25.0317	26.5232	26.3694	26.2745	26.4667	26.6788	26.3916	26.8254	6	6	5	29.5	29.5	24.4	26.228	0	96.484	1539000000	28		86.7572	77.9009	72.8926	83.3893	96.7422	79.1179	107.199	7.02075	12.819	0.0886642	0.139927		26.8507	26.6969	26.602	26.7942	27.0063	26.7191	27.1529	26.7942	5.75489	1
P0AED2;P0AED1;P0AED0	Universal stress protein A	uspA	0.540877	1.04664	0.0888534	2849.38	4345.01	30.9751	30.7911	30.6425	30.7849	31.8981	31.4119	30.6447	31.4023	9	9	9	71.5	71.5	71.5	16.066	0	323.31	83186000000	417	3213.54	2825.16	2545.93	2812.89	6132.89	4363.1	2549.93	4334.12	274.84	1462.79	0.096456	0.33666	32.0097	31.8257	31.677	31.8195	32.9327	32.4464	31.6793	32.4369	31.9177	14.8762	49
P0AFK9	Spermidine/putrescine-binding periplasmic protein	potD	0.540051	1.32891	0.0672206	1402.16	2112.08	31.1558	30.962	31.02	31.1143	32.1235	31.5313	31.0936	31.6639	21	21	21	67	67	67	38.867	0	323.31	118620000000	456	1494.15	1304.57	1358.57	1451.32	2941.96	1943.42	1430.45	2132.5	86.2204	627.745	0.0614913	0.297216	30.9159	30.7221	30.78	30.8743	31.8835	31.2913	30.8536	31.424	30.8951	12.0241	54
P18776	Anaerobic dimethyl sulfoxide reductase chain B	dmsB	0.536582	1.46065	0.0603029	408.702	597.092	28.1429	28.7456	28.6148	28.5847	29.3635	29.1378	28.6573	29.0756	10	10	6	41	41	28.3	22.869	0	208.08	9804500000	82	309.676	472.263	430.934	421.933	727.89	621.503	443.95	595.026	69.5589	117.133	0.170195	0.196173	28.6681	29.2708	29.14	29.1099	29.8887	29.663	29.1825	29.6008	29.2267		8
P36999	23S rRNA (guanine(745)-N(1))-methyltransferase	rlmA	0.536512	1.23294	0.0768768	241.472	365.142	28.1703	28.1488	28.3149	28.1559	29.3411	28.7244	28.2489	28.6215	12	12	12	43.1	43.1	43.1	30.419	0	149.01	13486000000	169	236.648	233.111	261.856	234.274	537.158	348.804	250.039	324.568	13.6686	122.136	0.0566054	0.334488	28.2839	28.2624	28.4285	28.2695	29.4547	28.838	28.3625	28.7352	28.3955	4.39232	21
P0AG04;P0AG03	Flavin prenyltransferase UbiX	ubiX	0.534418	0.813218	0.114281	75.2028	101.056	26.1093	26.1685	25.3211	25.585	26.9318	26.5744	25.8871	25.9283	6	6	6	40.7	40.7	40.7	20.695	0	63.671	1758500000	48	82.4875	85.979		57.142	146.715	114.237	70.6036	72.6699	15.7383	36.4764	0.209278	0.360951	26.7786	26.8378		26.2543	27.6011	27.2437	26.5565	26.5977	26.7786	6	3
P30864	Uncharacterized HTH-type transcriptional regulator YafC	yafC	0.531726	0.978316	0.0918015	95.8339	144.617	27.2538	27.0899	26.7189	27.0067	28.1933	27.5379	26.9437	27.5213	12	12	12	47.7	47.7	47.7	33.775	0	205.9	4448100000	85	112.072	99.9262	77.0687	94.2682	216.368	136.743	90.2018	135.156	14.5489	52.4747	0.151814	0.362852	27.2164	27.0526	26.6816	26.9693	28.156	27.5006	26.9063	27.4839	27.1345	4.16993	12
P21829	Pyridoxal phosphate phosphatase YbhA	ybhA	0.525755	0.894816	0.100948	450.751	695.924	29.0093	29.0757	29.1288	29.1043	30.3795	29.7076	28.9956	29.3385	9	9	9	57.4	57.4	57.4	30.201	0	323.31	23753000000	176	428.927	449.329	466.338	458.41	1119.44	699.349	424.829	540.084	16.1241	303.947	0.0357716	0.436753	29.1333	29.1997	29.2528	29.2283	30.5035	29.8316	29.1196	29.4625	29.2405	9.21189	19
P0A9D6;P0A9D5;P0A9D4	Serine acetyltransferase	cysE	0.525513	1.2381	0.0763255	214.267	314.215	28.2654	28.0424	27.8162	27.7119	28.966	28.4166	28.0535	28.5018	10	10	9	53.8	53.8	46.9	29.316	0	172.31	12164000000	158	262.561	224.608	191.699	178.2	428.806	291.88	226.348	309.824	37.6357	84.3998	0.175648	0.268606	28.4323	28.2094	27.9831	27.8788	29.1329	28.5835	28.2204	28.6687	28.3264	8.94837	20
B1X6S9;B7MWP8;C4ZQQ4;P36562;B6I828;B7NC25;B7L916;B7M3C7;A7ZNF5;B7UT20;A8A1K5;B1IZQ9;B1LPV7	Nicotinate-nucleotide--dimethylbenzimidazole phosphoribosyltransferase	cobT	0.523962	1.02969	0.0897437	40.5399	66.5274	26.2039	25.6088	25.8286	26.0207	25.9372	26.7436	26.1713	26.9056	6	6	3	21.7	21.7	14.8	36.987	0	38.452	1543900000	32	49.0241	32.3185	37.6952	43.1219		71.5331	47.9198	80.1292	7.17244	16.678	0.176923	0.250693	26.0355	25.4403	25.6601	25.8522		26.5751	26.0029	26.7372	26.0029	6.10852	3
P65368;P65367	Uncharacterized protein YqcA	yqcA	0.523716	2.95488	0.0338545	576.167	833.811	28.451	28.5922	28.4736	28.6303	29.0864	29.1476	28.8328	29.1753	4	4	4	45	45	45	16.274	0	323.31	8111000000	67	541.796	598.125	550.449	614.299	845.373	882.371	707.847	899.651	35.4918	86.9746	0.0615998	0.10431	29.467	29.6083	29.4896	29.6464	30.1024	30.1636	29.8488	30.1913	29.7476	8.11374	8
Q1R3P3;Q0TA20;P0A7C4;P0A7C3;P0A7C2;C5A136;B7UPK4;B7NSK5;B7NFY7;B7N2Q0;B7MJ33;B7M7V6;B7LAZ0;B6I5Q8;B5Z184;B1XC42;B1LPK8;B1IUK9;A8A7E3;A7ZUR5;A1AIM0	LexA repressor	lexA	0.522322	1.84325	0.0470147	748.141	1096.6	29.3765	29.3844	29.4193	29.2971	30.2954	29.8384	29.5638	29.8691	15	15	15	77.7	77.7	77.7	22.357	0	139.58	24826000000	206	751.53	755.73	774.424	710.881	1430.06	1038.45	856.868	1061.02	26.7592	240.355	0.0357676	0.219182	29.9343	29.9423	29.9772	29.8549	30.8532	30.3962	30.1217	30.4269	30.0495	10.0042	23
P37624	Ribosome-associated ATPase	rbbA	0.521449	0.980019	0.0938269	13.3545	15.8698	25.3212	25.7926	24.9775	25.8312	26.5341	25.8995	25.717	25.8578	8	7	6	11.2	10.5	8.8	100.78	0	26.188	836230000	32		13.3545			22.4432	14.3919	12.6661	13.9781		4.44356		0.280001		24.1781			24.9195	24.2849	24.1025	24.2432	24.2432		3
P0AFX8;P0AFX7	Anti-sigma-E factor RseA	rseA	0.520895	1.29223	0.0774698	291.578	432.314	28.1463	28.2818	28.0941	28.0497	29.1389	28.7323	28.1256	28.6586	8	8	8	54.6	54.6	54.6	24.321	0	204.62	11975000000	94	291.703	320.745	281.24	272.626	584.497	439.687	287.518	417.554	20.9507	121.652	0.0718527	0.281398	28.5827	28.7182	28.5305	28.4861	29.5753	29.1687	28.562	29.095	28.6504	5.90689	20
P0AFR3;P0AFR2	C4-dicarboxylic acid transporter DauA	dauA	0.519938	1.42228	0.0663493	33.7114	44.9725	26.5544	26.2637	25.8664	26.2175	27.0115	26.9476	26.5294	26.4934	7	7	7	13.8	13.8	13.8	59.428	0	22.942	1661700000	37	38.8133	31.6647		30.6562	53.4506	51.1127	38.138	37.1887	4.44707	8.50254	0.131916	0.189061	25.7019	25.4111		25.3649	26.1589	26.0951	25.6768	25.6408	25.6768		3
P23869	Peptidyl-prolyl cis-trans isomerase B	ppiB	0.518785	0.935149	0.0982478	10303.6	15664.8	32.7338	32.8977	32.7793	32.8453	33.978	33.5398	32.661	33.1523	9	9	9	49.4	49.4	49.4	18.153	0	323.31	240020000000	488	9731.67	10914.6	10046.3	10521.9	23254.9	17110.9	9248	13045.2	521.009	5992.74	0.0505656	0.382562	33.5922	33.756	33.6376	33.7037	34.8364	34.3982	33.5194	34.0107	33.7299	11.7553	58
P0A9D3;P0A9D2	Glutathione S-transferase GstA	gstA	0.516479	1.00093	0.0921294	404.083	609.341	28.4709	28.6262	28.4684	28.5201	29.6732	29.0794	28.3867	29.0124	13	13	13	72.6	72.6	72.6	22.868	0	292.42	17641000000	218	389.641	434.406	388.976	403.311	904.154	596.611	367.327	569.274	21.2672	221.55	0.0526307	0.363589	28.9961	29.1515	28.9937	29.0454	30.1984	29.6046	28.9119	29.5376	29.0984	8.6865	31
P63624;P63623;B5YY02;B7NF60;B1LL71;B7M5A0;B7L891;B6I3Y1;A7ZTV5	Aspartate--ammonia ligase	asnA	0.515751	0.952432	0.0976178	589.62	861.053	30.1731	29.4764	29.6056	29.6092	30.7051	30.2538	29.609	30.3593	15	15	1	65.2	65.2	6.7	36.649	0	323.31	36852000000	315	796.798	489.235	535.554	536.891	1156.46	843.151	536.838	907.769	139.885	254.873	0.237246	0.296001	30.0179	29.3212	29.4504	29.454	30.5499	30.0986	29.4539	30.2041	29.7359		38
P42630	L-serine dehydratase TdcG	tdcG	0.515388	1.17548	0.0797712	154.135	214.255	27.6627	28.7121	28.0607	28.2895	28.871	28.6432	28.5354	28.737	10	8	8	29.7	22.7	22.7	48.521	0	107.47	10356000000	122	103.494	215.781	136.754	160.51	241.167	205.613	190.672	219.568	47.2846	21.4735	0.306774	0.100224	27.1027	28.1521	27.5007	27.7294	28.3109	28.0831	27.9754	28.1769	28.0293		13
P51025;B1XEU8;B1J086;Q8FKG2;Q1RFI8;Q0TKS8;A7ZX03;A7ZIA3;A1A834;B1LIP0;Q8X5J5	S-formylglutathione hydrolase FrmB	frmB	0.514162	1.10322	0.0883487	509.767	764.517	29.3441	29.2604	29.3207	29.3264	30.4971	29.808	29.3529	29.6502	10	10	10	55.2	55.2	55.2	31.424	0	268.14	25536000000	184	520.888	491.247	512.449	514.487	1167.72	720.805	524.129	645.419	12.8601	280.744	0.0252273	0.367217	29.4108	29.3271	29.3875	29.3931	30.5638	29.8747	29.4196	29.717	29.4152	7.87036	23
P0AAJ2;P0AAJ1	Probable anaerobic dimethyl sulfoxide reductase chain YnfG	ynfG	0.512027	1.27415	0.0759217	136.433	190.863	26.3443	27.2505	27.0632	27.0472	27.5704	27.2468	27.3892	27.5469	7	3	3	31.2	15.6	15.6	22.752	0	8.8256	2507000000	43	88.3609	166.656	146.173	144.541	208.497	166.224	183.648	205.084	33.5905	19.7682	0.246206	0.103572	26.8769	27.7831	27.5958	27.5798	28.103	27.7794	27.9218	28.0795	27.7813		3
P76014	PEP-dependent dihydroxyacetone kinase, ADP-binding subunit DhaL	dhaL	0.510278	0.844577	0.115898	490.549	745.514	28.862	28.7093	28.7768	28.7873	29.907	29.5287	28.4834	29.2573	11	11	11	72.4	72.4	72.4	22.632	0	323.31	23645000000	176	517.761	465.262	487.785	491.388	1076.2	825.758	397.221	682.878	21.5117	283.444	0.0438522	0.3802	29.4022	29.2495	29.317	29.3275	30.4472	30.0689	29.0237	29.7975	29.3648	7.02237	21
P0ACS1;P0ACS0;P0ACR9	Transcriptional repressor MprA	mprA	0.508163	1.78831	0.0482291	2554.38	3701.72	31.042	30.9582	31.0823	30.9249	31.8587	31.5516	31.1304	31.4993	12	12	12	78.4	78.4	78.4	20.563	0	323.31	48880000000	194	2624.65	2475.03	2699.83	2417.99	4649.59	3749.97	2792.21	3615.12	130.374	760.59	0.0510393	0.205469	31.7205	31.6367	31.7609	31.6034	32.5373	32.2301	31.8089	32.1778	31.7849	10.7607	13
P69784;P69783	PTS system glucose-specific EIIA component	crr	0.507934	1.77641	0.0489381	19929.9	28919.8	33.7424	33.7425	33.8387	33.7353	34.6502	34.256	33.9028	34.2818	13	13	13	71	71	71	18.251	0	323.31	577600000000	637	19612	19613.4	20979.9	19514.1	37028	28098.9	21941.6	28610.7	701.597	6196.97	0.0352033	0.214281	34.5931	34.5932	34.6894	34.5859	35.5008	35.1067	34.7534	35.1324	34.7214	14.6217	77
Q1R448;Q0TAJ6;P0A6P8;P0A6P7;C5A033;B7UNI7;B1LMP7;B1IW48;A8A6W6;A7ZU66;Q8X8H0;B5YZ00;A1AI47	Probable GTP-binding protein EngB	engB	0.504438	2.14019	0.039675	1450.33	2087.67	30.3657	30.3805	30.414	30.404	31.1071	30.9229	30.5344	31.0176	15	15	14	64.3	64.3	59	23.561	0	323.31	66491000000	359	1424.69	1439.56	1473.68	1463.39	2394.16	2104.5	1603.29	2248.75	22.2809	343.895	0.0153626	0.164726	30.8479	30.8627	30.8962	30.8862	31.5892	31.4051	31.0165	31.4998	30.9564	10.7151	43
P16456;A8A0V7;Q0TH64;P66794;P66793;A7ZMN3	Selenide, water dikinase	selD	0.504	1.22993	0.0796193	823.652	1213.96	30.1878	30.181	30.2641	30.2528	31.3011	30.7691	30.2887	30.5428	16	16	15	64.6	64.6	58.8	36.687	0	323.31	77366000000	352	804.202	800.416	848.32	841.67	1753.46	1208.18	863.07	1031.12	24.842	386.285	0.0301608	0.318202	30.0311	30.0244	30.1074	30.0961	31.1444	30.6124	30.132	30.3861	30.1197	10.4533	42
Q8X8E0-2;P75960-2;Q8X8E0;P75960;Q8FIM4-2;Q8FIM4	Isoform CobB-Short of NAD-dependent protein deacylase	cobB	0.503165	1.24351	0.0795409	373.314	536.027	28.9143	28.3162	28.5626	28.5635	29.2453	29.2318	28.5699	29.3223	9	9	9	60.6	60.6	60.6	26.188	0	184.26	14211000000	154	463.477	304.909	362.315	362.554	584.358	578.856	364.169	616.726	65.9429	115.784	0.176642	0.216003	29.244	28.6459	28.8923	28.8932	29.575	29.5615	28.8996	29.652	29.0718	9.50779	15
P0A8W3;P0A8W2;C4ZYA5;B7M0J9;B7L5J5;B5Z476;B1XFV4;A8A0I5;A7ZMA4;P0A4U5;P0A4U4;B7NTZ0;B7NB96;B7MVC0;B7M9Z6;B1LEP4	Transcriptional regulator SlyA	slyA	0.502977	1.22765	0.0800648	930.418	1349.19	29.4778	29.2817	29.0764	29.0416	30.2028	29.6499	29.2729	29.7638	8	8	8	74.3	74.3	74.3	16.353	0	85.381	10363000000	121	1106.51	964.519	835.376	815.268	1838.19	1248.18	958.588	1351.79	134.738	366.015	0.144814	0.271286	30.4869	30.2907	30.0854	30.0506	31.2118	30.659	30.2819	30.7728	30.3888	9.61471	17
P0ABK6;P0ABK5	Cysteine synthase A	cysK	0.50082	1.23829	0.0793856	1789.05	2621.8	31.2915	31.3127	31.1426	31.2096	32.2635	31.6529	31.2442	31.799	20	20	19	72.4	72.4	72.1	34.489	0	323.31	136730000000	542	1853.84	1881.55	1670.33	1750.49	3661.27	2387.61	1793.5	2644.81	97.1856	779.305	0.0543224	0.297241	31.2239	31.2451	31.0751	31.142	32.196	31.5853	31.1767	31.7315	31.2345	14.4128	60
P18390	Uncharacterized protein YjjA	yjjA	0.500411	1.98572	0.0469064	276.531	397.789	27.6141	27.5358	27.6357	27.5434	28.4629	27.9311	27.8667	28.0698	5	5	5	31.7	31.7	31.7	17.352	0	319.77	3873100000	40	282.634	267.56	286.942	268.989	512.086	352.867	337.326	388.875	9.71244	79.1981	0.0351224	0.199096	28.5376	28.4593	28.5592	28.4669	29.3864	28.8545	28.7902	28.9933	28.6747	8.64386	7
P63419;P63418;P63417	Uncharacterized N-acetyltransferase YhbS	yhbS	0.499905	1.84849	0.0486716	1582.62	2266.9	30.1738	30.2711	30.2361	29.9801	30.8954	30.5675	30.3394	30.8585	8	8	8	59.9	59.9	59.9	18.534	0	215.22	34820000000	219	1587.27	1699.16	1658.11	1385.93	2630.7	2091.02	1782.37	2563.51	139.032	402.505	0.0878493	0.177557	31.0022	31.0995	31.0646	30.8085	31.7238	31.3959	31.1678	31.6869	31.1336	10.1923	29
A1ABP2;B7MVI5;Q8FH30;Q1RB89;Q0THC2;C4ZYG8;B7US45;P77649;B7MAR7;B6I8R1;B1XG13;B1IQ50;A8A0P8;B5YPZ4;Q8X5W3;B7L6H9;A7ZMH3;B7N544;B7NTS5;B1LE24	Protein adenylyltransferase SelO	selO	0.49802	0.749255	0.13444	22.1463	38.9603	25.5708	25.7605	25.4799	25.698	26.8969	26.1507	25.3276	26.126	10	10	10	32.4	32.4	32.4	54.624	0	48.113	1621300000	47	21.2262	24.2398	19.9167	23.2025	53.714	31.8568		31.3102	1.94219	12.78	0.0876982	0.328025	24.8399	25.0295	24.7489	24.967	26.1659	25.4198		25.3951	25.0295	6.45943	4
P15047	2,3-dihydro-2,3-dihydroxybenzoate dehydrogenase	entA	0.497889	0.858178	0.114836	107.615	159.273	27.0695	26.5923	26.9375	26.6771	27.8759	27.6672	26.7533	26.9716	4	4	4	22.6	22.6	22.6	26.249	0	24.14	2506100000	59	127.072	90.9851	115.859	96.5453	223.491	193.112	101.837	118.654	16.7893	58.3605	0.156012	0.366417	27.3958	26.9187	27.2639	27.0034	28.2022	27.9936	27.0796	27.2979	27.2809	5.35755	11
P0AAI9;P0AAJ0;Q8X8I7	Malonyl CoA-acyl carrier protein transacylase	fabD	0.496844	1.08397	0.0900846	3353.98	4918.32	32.1377	31.8891	32.1692	31.9813	33.0589	32.7479	32.0096	32.3484	13	13	13	67.3	67.3	67.3	32.417	0	323.31	194710000000	444	3569.19	2998.97	3648.71	3199.04	6802.39	5471.51	3262.92	4136.46	307.257	1549.99	0.0916097	0.315146	32.1596	31.9109	32.191	32.0032	33.0807	32.7698	32.0314	32.3702	32.1753	12.6771	61
P26365	N-acetylmuramoyl-L-alanine amidase AmiB	amiB	0.496695	1.89139	0.0500491	55.4799	78.8412	26.5265	26.7667	26.751	26.9492	27.3623	27.4694	27.1956	26.9528	16	16	16	48.8	48.8	48.8	47.985	0	231.06	4172300000	79	47.2395	55.8928	55.2798	63.5074	84.809	91.4155	75.4695	63.6708	6.64716	12.0449	0.119812	0.152774	25.9825	26.2227	26.207	26.4052	26.8183	26.9254	26.6516	26.4088	26.407	3.45943	11
Q8XCH6;Q8FGQ6;Q1RAR4;Q0TGW2;P76290;C4ZQF4;B7USP7;B7NS48;B7NBM1;B7MW64;B7MBS9;B7M2G1;B7L7S3;B6I1E8;B5YR15;B1XHD8;B1LD01;B1J0L8;A8A171;A7ZMZ5;A1AC31	Carboxy-S-adenosyl-L-methionine synthase	cmoA	0.4962	0.880976	0.113032	488.215	733.62	29.1676	29.0752	29.0595	28.989	30.3074	29.7042	29.0662	29.1983	13	13	13	65.6	65.6	65.6	27.79	0	163.88	23024000000	192	521.191	488.547	483.2	459.921	1157.63	758.848	485.468	532.533	25.2533	306.831	0.0517258	0.418243	29.4116	29.3192	29.3035	29.233	30.5514	29.9482	29.3102	29.4424	29.3654	8.9629	28
Q1R7B9;Q1JQN5;Q0TDU2;P0ADS4;P0ADS3;P0ADS2;C5A0I2;B7UHV8;B7NHX1;B7N7F3;B7MZK7;B7MM96;B7LYH4;B7LFG9;B6I743;B5YQA4;B1XEJ6;B1LDB2;B1IT92;A8A451;A7ZR20;A1AF99	Cell division protein ZapA	zapA	0.495263	1.9855	0.0478939	1067.33	1501.38	28.91	29.2405	28.7792	29.2146	29.454	29.7422	29.429	29.5	5	5	5	66.1	66.1	66.1	12.594	0	174.55	11539000000	75	968.003	1219.97	883.249	1198.08	1416.69	1733.5	1392.18	1463.13	167.478	157.523	0.156914	0.104919	30.2959	30.6263	30.165	30.6004	30.8398	31.1281	30.8149	30.8859	30.7206	10.2668	12
A7ZKH2;A7ZZ25;B1IV35;B1X9I0;B6I9E4;B7LG01;B7M942;C4ZS07;P29217;Q1RD90;Q8X8M9;B5YVT7;Q8FIR0;B1LIU3;B7NAU2;B7MIK8;A1A9W2;B7MTJ8;B7NL67;B7UP81;Q0TJ07	UPF0502 protein YceH	yceH	0.49451	1.13448	0.0866114	472.612	690.408	28.9607	28.6583	28.8053	28.8603	29.8475	29.4798	28.8554	29.08	11	11	11	67.4	67.4	67.4	24.15	0	317.75	17181000000	178	519.624	420.45	466.028	484.344	966.764	747.317	482.679	564.871	41.2797	214.881	0.0873438	0.311238	29.4073	29.1048	29.2518	29.3069	30.294	29.9263	29.302	29.5266	29.3571	10.151	21
P31057;C4ZRM7;B1XCA9;B1IQK6;Q8FL30;Q1RG56;Q0TLJ8;B7UII2;B7NI94;B7N804;B7MNZ6;B7MBB7;B1LGT6;A1A7I0	3-methyl-2-oxobutanoate hydroxymethyltransferase	panB	0.493991	1.15599	0.0875076	1256.03	1838.23	30.516	30.4156	30.4534	30.3999	31.4401	31.079	30.3736	30.8681	10	10	3	61.4	61.4	10.6	28.237	0	323.31	79735000000	363	1318.25	1228.79	1261.72	1215.35	2517.69	1955.28	1193.17	1686.78	45.8295	552.09	0.0364876	0.300337	30.737	30.6366	30.6744	30.6209	31.6611	31.3	30.5946	31.0891	30.7057	11.0485	42
P75863	Uncharacterized protein YcbX	ycbX	0.49139	2.28076	0.0392051	227.978	324.438	28.4798	28.5285	28.5612	28.5691	29.2442	29.0912	28.7087	29.06	16	16	16	59.9	59.9	59.9	40.644	0	323.31	27045000000	266	219.326	226.927	232.19	233.468	374.552	336.505	257.451	329.244	6.42529	48.8787	0.0281838	0.150657	28.1754	28.224	28.2568	28.2646	28.9397	28.7867	28.4043	28.7556	28.3344	8.26679	29
P69829	Nitrogen regulatory protein	ptsN	0.49055	1.43572	0.0746275	1926.21	2781.43	30.3646	30.3856	30.4024	30.4644	31.3337	30.991	30.4656	30.7889	9	9	9	61.3	61.3	61.3	17.959	0	323.31	36314000000	170	1872.86	1900.5	1923.09	2008.38	3691.15	2903.88	2010.01	2520.69	58.5061	708.44	0.0303737	0.254703	31.2385	31.2594	31.2763	31.3383	32.2076	31.8649	31.3395	31.6628	31.3389	10.9046	17
P67088;P67087	Ribosomal RNA small subunit methyltransferase I	rsmI	0.488517	1.49006	0.0716475	383.392	550.347	28.8339	28.9181	29.0004	28.853	29.6755	29.4064	28.9009	29.5766	17	17	17	70.6	70.6	70.6	31.348	0	323.31	32201000000	307	365.316	387.511	410.49	370.252	658.565	545.458	382.875	614.489	20.4178	120.963	0.0532555	0.219794	28.9041	28.9883	29.0706	28.9232	29.7458	29.4766	28.9711	29.6468	29.0294	9.00282	37
P30014;Q1RBE3;Q0THH6;P66682;P66681;A8A0J6;A7ZMB5;A1ABJ5	Ribonuclease T	rnt	0.486623	0.780736	0.131242	729.12	1066.57	29.5743	29.161	29.6617	29.1537	30.4518	29.989	29.1164	29.9399	11	11	11	70.2	70.2	70.2	23.522	0	189.38	16303000000	183	819.991	613.947	871.73	610.813	1515.76	1096.27	595.092	1059.18	136.451	376.387	0.187145	0.352893	30.0589	29.6456	30.1463	29.6382	30.9364	30.4736	29.601	30.4244	30.1026	8.55842	19
P0AFZ4;P0AFZ3	Stringent starvation protein B	sspB	0.485677	1.11364	0.0901579	1246.15	1810.96	29.9232	29.7767	29.7759	29.7449	30.7539	30.3336	29.6779	30.398	5	5	5	32.7	32.7	32.7	18.262	0	165.4	22575000000	188	1351.91	1220.12	1219.38	1193.2	2418.42	1801.92	1138.57	1884.94	71.6088	524.933	0.0574639	0.289864	30.773	30.6265	30.6256	30.5946	31.6036	31.1834	30.5277	31.2477	30.6997	9.47776	27
P63944;P63943;P0A6L2;B7NQL6;B7MYB7;B7M7I1;B7LCL6;B6I548;B5Z015;B1LNC8;B1IWI1;A8A2X1;A7ZPS4	4-hydroxy-tetrahydrodipicolinate synthase	dapA	0.485666	1.48069	0.0737693	1649.25	2361.54	30.8696	31.0449	31.0869	30.9228	31.879	31.4707	31.0523	31.4648	9	9	9	42.5	42.5	42.5	31.284	0	307.5	56460000000	351	1522.57	1721.33	1772.75	1580.35	3086.74	2319.32	1730.29	2309.8	117.253	556.432	0.0710945	0.235623	30.9428	31.118	31.1601	30.996	31.9521	31.5439	31.1254	31.538	31.1427	11.952	48
P0AFJ6;P0AFJ5	Phosphate regulon transcriptional regulatory protein PhoB	phoB	0.485408	1.09558	0.0912403	73.7577	105.668	26.0161	26.272	26.328	26.5451	27.1371	26.8823	26.1906	26.8928	5	5	5	33.6	33.6	33.6	26.433	0	30.777	1644400000	26	60.3532	72.1917	75.0795	87.4066	132.298	110.678	68.1948	111.501	11.1082	26.9105	0.150603	0.254671	26.3324	26.5882	26.6442	26.8614	27.4534	27.1985	26.5069	27.2091	26.7528	3.16993	5
P0ACG2;P0ACG1	DNA-binding protein StpA	stpA	0.485406	1.47164	0.0753537	12625.3	18067.2	32.9594	32.7181	32.8118	32.9501	33.7801	33.3909	32.9832	33.2269	9	8	8	65.7	60.4	60.4	15.347	0	323.31	206730000000	504	13503.3	11404.5	12178.1	13415.5	23988	18266	13729.9	16284.9	1014.2	4362.11	0.0803307	0.241438	34.06	33.8187	33.9125	34.0507	34.8807	34.4915	34.0838	34.3275	34.0719	12.3556	63
P0AF09;P0AF08	Iron-sulfur cluster carrier protein	mrp	0.484834	1.04811	0.0963243	1487.84	2169.8	31.1405	31.29	31.1004	31.2177	32.1896	31.7285	31.0443	31.7253	12	12	12	37.7	37.7	37.7	39.938	0	323.31	92894000000	343	1438.15	1596.88	1398.33	1518.01	2997.94	2170.8	1344.53	2165.94	88.0912	675.006	0.0592072	0.311091	30.8613	31.0108	30.8212	30.9385	31.9105	31.4494	30.7652	31.4462	30.9747	11.0189	40
P0AE35;P0AE34	Arginine ABC transporter permease protein ArtQ	artQ	0.484665	1.17441	0.0868444	149.621	216.995	27.4099	27.256	27.3023	27.2291	28.3106	27.8834	27.2937	27.6484	4	4	4	19.3	19.3	19.3	26.217	0	109.82	5131300000	82	161.471	144.98	149.759	142.276	303.363	224.941	148.855	190.821	8.48404	65.4491	0.0567034	0.301616	27.738	27.5841	27.6304	27.5572	28.6386	28.2115	27.6218	27.9765	27.6842		10
P41052	Membrane-bound lytic murein transglycosylase B	mltB	0.484576	1.17266	0.0861355	156.348	222.69	28.3122	27.8998	27.8965	27.7588	28.9596	28.458	28.1517	28.2364	9	9	9	44.9	44.9	44.9	40.255	0	323.31	9038000000	121	196.938	147.555	147.216	133.683	309.874	218.102	176.012	186.771	27.8207	60.8033	0.177941	0.273041	28.0216	27.6093	27.606	27.4682	28.669	28.1674	27.8611	27.9459	27.9035	4.45943	17
P00934	Threonine synthase	thrC	0.483678	1.09151	0.0921428	615.116	895.492	30.2529	30.0884	30.1439	30.173	31.1952	30.6284	30.079	30.6904	25	25	25	73.6	73.6	73.6	47.113	0	323.31	100250000000	584	653.81	582.674	605.774	618.204	1264.63	850.371	578.856	888.105	29.7012	282.025	0.0482856	0.314939	29.7354	29.5709	29.6264	29.6554	30.6777	30.1108	29.5615	30.1728	29.6954	11.7736	81
P0AA45;P0AA44;P0AA43	Ribosomal small subunit pseudouridine synthase A	rsuA	0.483096	1.67622	0.0621042	974.872	1380.78	29.9342	29.7591	30.0947	30.0238	30.7203	30.3717	30.0822	30.57	13	13	13	82.7	82.7	82.7	25.865	0	323.31	43562000000	246	958.528	847.892	1072.51	1020.56	1661.95	1302.05	1063.15	1495.96	96.6291	257.82	0.0991198	0.186721	30.2818	30.1067	30.4423	30.3714	31.0679	30.7193	30.4298	30.9176	30.4361	10.8265	31
P39310	Cell division protein YtfB	ytfB	0.48253	0.889287	0.115668	270.429	399.397	27.998	27.9055	28.0021	28.0464	29.0515	28.2902	27.8001	28.7402	7	7	7	40.6	40.6	40.6	23.505	0	323.31	10288000000	133	272.155	255.086	272.935	281.541	569.075	333.947	236.943	457.625	11.0778	144.748	0.0409638	0.362416	28.4836	28.3911	28.4877	28.532	29.5372	28.7758	28.2857	29.2258	28.5099	7.79442	20
P0AEY0;P0AEX9	Maltose/maltodextrin-binding periplasmic protein	malE	0.482409	0.77013	0.133407	2502.11	3725.76	32.251	31.8722	31.995	32.0589	33.2586	32.5568	31.7952	32.4962	29	29	28	79.8	79.8	79	43.387	0	323.31	444710000000	1473	2878.39	2207.91	2406.1	2516.06	5827.96	3565.64	2091.97	3417.45	281.4	1550.18	0.112465	0.416072	31.8523	31.4736	31.5964	31.6602	32.8599	32.1581	31.3965	32.0975	31.7563	13.0464	167
P0AFY9;P0AFY8	Negative modulator of initiation of replication	seqA	0.482289	1.51398	0.0722634	3837.98	5491.34	31.6235	31.581	31.5811	31.4795	32.478	32.1212	31.6842	31.9109	11	11	11	54.1	54.1	54.1	20.315	0	323.31	98937000000	301	3992.17	3875.05	3875.43	3609.27	7261.53	5656.54	4165.4	4881.91	162.129	1327.95	0.0422432	0.241826	32.3195	32.277	32.2771	32.1755	33.174	32.8173	32.3802	32.6069	32.3499	11.4226	31
Q1R8T7;P76539;P63421;P63420;A1ADU8;Q0TF35	Acetyltransferase YpeA	ypeA	0.481977	1.03548	0.0961176	376.128	547.91	27.8446	27.954	27.8477	28.0776	29.0082	28.2532	27.8916	28.4988	6	6	6	54.6	54.6	54.6	16.325	0	71.795	7113200000	79	353.248	381.387	354.03	415.847	797.825	470.256	365.078	558.481	29.5359	184.415	0.0785261	0.336579	28.8561	28.9656	28.8592	29.0891	30.0197	29.2647	28.9031	29.5103	29.0273	7.48382	9
P0AF27;P0AF26	Nitrate reductase molybdenum cofactor assembly chaperone NarJ	narJ	0.481599	1.14456	0.0897906	287.785	409.19	28.0646	28.5501	28.2665	28.0522	29.1119	28.6374	28.2341	28.8764	13	13	13	77.5	77.5	77.5	26.449	0	261.83	8482300000	135	253.111	355.578	291.535	250.916	526.94	377.982	284.996	446.841	48.8927	102.763	0.169893	0.251138	28.38	28.8655	28.5818	28.3676	29.4273	28.9528	28.5495	29.1918	28.7237	5.45943	18
A1A9T2;B7M908;Q8X9J6;Q8CW65;Q1RDC7;Q0TJ40;B7NLA0;B7MIH4;B7N3I1;B7LFE4;B6I9B0;B5YVQ4;B1LIY0;B1IV67;A7ZYY7;A7ZKD6;B1X9E8;C4ZRX5;P75914;B7MTG5;B7UP48	Probable phosphatase YcdX	ycdX	0.479568	1.15795	0.0902864	418.435	603.399	28.6634	28.7559	28.8566	28.9238	29.7825	29.458	28.8654	29.012	13	13	13	71.8	71.8	71.8	26.832	0	323.31	31959000000	307	379.392	404.756	434.333	455.26	830.565	661.736	437.02	484.273	33.2678	179.704	0.0795053	0.297819	28.9581	29.0505	29.1512	29.2184	30.0772	29.7526	29.16	29.3067	29.1892	7.7879	33
P75736	Esterase YbfF	ybfF	0.479068	1.42134	0.0762995	511.98	728.188	29.3538	29.0522	29.1886	29.0872	30.0371	29.6362	29.2214	29.7034	13	13	13	87.4	87.4	87.4	28.437	0	133.21	19679000000	171	580.118	469.7	516.754	481.346	936.032	706.94	528.759	741.023	49.6373	166.921	0.0969518	0.229227	29.5646	29.263	29.3994	29.298	30.2479	29.847	29.4322	29.9142	29.4984	7.36632	9
P09127	Protein HemX	hemX	0.478728	1.12821	0.0898144	487.486	705.61	29.733	29.5975	29.7273	29.7398	30.7259	30.1271	29.6546	30.2049	19	19	19	67.2	67.2	67.2	42.962	0	323.31	49923000000	280	498.669	453.526	496.694	501.056	999.372	657.11	472.044	693.916	22.7104	218.585	0.0465868	0.309781	29.3485	29.213	29.3428	29.3553	30.3414	29.7426	29.2702	29.8204	29.3519	9.96	37
Q47146;Q8X7R2	Acyl-coenzyme A dehydrogenase	fadE	0.477755	0.966793	0.103723	47.3554	64.0454	26.6995	27.5843	27.7965	27.4001	28.1062	27.7395	27.761	27.7846	27	27	27	44.7	44.7	44.7	89.223	0	181.37	10160000000	146	28.4981	52.9511	61.4305	46.5419	76.3079	59.0276	59.9241	60.922	13.9724	8.21155	0.295053	0.128214	25.2607	26.1455	26.3577	25.9612	26.6674	26.3007	26.3222	26.3458	26.3114	7.56224	6
A7ZM83;B7L5H5;P22333;C4ZY85;B7M0H9;B7NB76;B6IB57;B1XF88;B1IQD2;A8A0G5;A1ABG8;B7M9X6;Q0THK5;Q1RBH5;Q8FH99;B5Z457;Q8X661;B7NU11;B7URW2;B1LER3;B7MVA0	Adenosine deaminase	add	0.477656	1.76243	0.0613538	1921.23	2708.07	31.2689	31.4871	31.3315	31.5727	32.2256	31.9485	31.6277	31.769	17	17	17	76	76	76	36.397	0	323.31	114090000000	334	1728.11	2013.36	1805.64	2137.79	3376.64	2781.22	2221.65	2452.79	188.013	501.368	0.0978609	0.185138	31.1236	31.3418	31.1863	31.4275	32.0804	31.8033	31.4824	31.6238	31.455	10.6466	43
P0AFM7;P0AFM6	Phage shock protein A	pspA	0.476205	1.5605	0.0717333	903.246	1278.66	29.6675	29.9411	29.7968	29.8934	30.6405	30.2923	29.9001	30.3708	15	15	14	61.7	61.7	59	25.493	0	323.31	47495000000	260	806.971	977.354	883.435	945.226	1594.8	1249.79	949.677	1320.38	75.09	265.046	0.0831335	0.207284	30.036	30.3096	30.1653	30.2619	31.009	30.6608	30.2686	30.7393	30.2891	9.54496	30
P0ACQ6;P0ACQ5;P0ACQ4	Hydrogen peroxide-inducible genes activator	oxyR	0.475415	1.21707	0.0878525	390.419	560.974	28.9818	29.1496	29.0125	29.0805	30.0401	29.3661	29.0872	29.6327	14	14	14	56.4	56.4	56.4	34.276	0	164.64	33369000000	348	370.239	416.404	378.297	396.738	776.748	484.555	398.609	583.985	20.5694	162.573	0.0526854	0.289806	28.9232	29.091	28.9539	29.0219	29.9815	29.3075	29.0286	29.5741	29.0598	9.17493	35
Q1R609;Q0TCE5;P0A7U5;P0A7U4;P0A7U3;C4ZUH1;B7UK40;B7NLN5;B7NDT7;B7N1A0;B7MCT1;B7M1N0;B7L4K5;B6I230;B5YTN7;B1X6G7;B1LHD0;B1IPY3;A8A5C1;A7ZSK5;A1AGK4	Small ribosomal subunit protein uS19	rpsS	0.474609	1.45027	0.0769511	39696.3	56339.8	33.9186	33.9173	33.8279	34.0924	34.7763	34.2904	34.0129	34.575	8	8	8	70.7	70.7	70.7	10.43	0	323.31	835000000000	1049	39042.1	39007.9	36640.6	44094.7	71179.1	50652.9	41707.4	61819.8	3140.33	12867.1	0.0791088	0.228383	35.5764	35.5752	35.4858	35.7502	36.4342	35.9483	35.6707	36.2328	35.7105	15.6396	126
P0ADS7;P0ADS6	Uncharacterized protein YggE	yggE	0.472834	1.37526	0.077048	935.785	1328.45	30.1252	29.8898	29.882	29.855	30.8559	30.2795	30.0381	30.4698	10	10	10	45.1	45.1	45.1	26.635	0	323.31	53688000000	247	1063.66	902.016	897.135	880.323	1774.17	1185.02	1000.75	1353.86	85.7582	330.287	0.0916431	0.248626	30.4305	30.195	30.1873	30.1603	31.1612	30.5848	30.3434	30.775	30.3869	10.3174	31
P0AC51	Zinc uptake regulation protein	zur	0.472798	1.56143	0.0718173	306.691	433.015	27.6955	27.9715	27.8482	27.989	28.7908	28.1599	28.1958	28.2489	5	5	5	36.8	36.8	36.8	19.254	0	177.34	6896500000	82	269.376	326.793	299.763	330.831	579.968	372.867	382.363	396.863	28.4444	98.4641	0.0927463	0.227392	28.4689	28.7449	28.6216	28.7625	29.5642	28.9333	28.9692	29.0224	28.8479	7.02237	7
P0AGB8;P0AGB7;P0AGB6	ECF RNA polymerase sigma-E factor	rpoE	0.472218	1.47053	0.0773136	201.035	285.676	27.4762	27.5048	27.3962	27.4191	28.3224	28.0153	27.5045	27.8431	9	9	9	57.6	57.6	57.6	21.695	0	195.01	6665700000	106	204.794	208.939	193.642	196.764	370.348	298.692	208.894	264.77	7.05964	67.5063	0.0351165	0.236304	28.0774	28.1061	27.9975	28.0203	28.9236	28.6165	28.1058	28.4443	28.1059	9.14211	15
A1AEY0;B7MLB4;Q1R7P9;Q0TE65;P0A8U1;P0A8U0;C4ZZU8;B7UHK9;B7NVU1;B7MZ89;B7LXK9;B7LEX3;B6I6J1;B1XDK2;B1LQY6;B1IU48;A8A3S8;A7ZQN6;B7N727;B5Z3F8;Q8X6T2	Protein Syd	syd	0.468891	0.663402	0.16609	536.604	789.733	28.9548	28.4427	29.0683	28.5812	30.0933	29.2093	28.703	28.9169	7	7	7	35.9	35.9	35.9	20.708	0	185.04	12420000000	104	604.427	422.296	654.396	465.298	1341.31	722.33	506.722	588.574	110.492	378.302	0.205911	0.479025	29.6232	29.1111	29.7367	29.2496	30.7617	29.8777	29.3714	29.5853	29.6043	7.29462	12
A7ZXD3;B7M3W7;Q8XD39;C4ZUS9;B7NIF5;B7N928;P23871;B7L7A0;B6I0C7;B5Z3Y6;B1XFR2;B1IZB9;Q8FK83;A7ZIN5;B7MQJ0;Q0TKG6;Q1RF60;A1A8E1;B7MDZ7;B1LJN3;B7UKF5	Ferrochelatase	hemH	0.468694	1.00705	0.101792	143.181	207.203	27.8041	27.6804	27.6801	27.5891	28.8076	28.0661	27.6793	28.0754	11	11	11	44.1	44.1	44.1	35.87	0	212.11	6133400000	94	155.037	142.172	142.146	133.369	313.02	186.253	142.066	187.473	8.92437	73.6395	0.0623293	0.355397	27.6799	27.5562	27.5559	27.4649	28.6834	27.9419	27.5551	27.9512	27.618	5.93074	14
B1XBD1;C4ZPT3;P0A8I3;A7ZH96;B6HZ03;B7L4D1;B1IRG7;B7M0A3;Q8XA76;B5YYA0;A7ZVU9;B7MNL4;B7NHA9;Q8FLD3;B7N7N1;Q0TLY2;B1LFT7;B7UI51;Q1RGJ7;B7M9R9;A1A759	UPF0246 protein YaaA	yaaA	0.46741	0.996206	0.102772	457.485	662.968	29.1195	28.9991	29.1095	29.0554	30.1958	29.3925	29.0532	29.5117	18	18	18	73.6	73.6	73.6	29.585	0	243.34	29424000000	251	473.067	434.823	469.756	452.292	1005.03	572.7	451.599	622.539	17.6438	239.074	0.038567	0.360612	29.2732	29.1528	29.2632	29.2091	30.3495	29.5462	29.2069	29.6654	29.2682	10.1098	23
A8A6Z4;B1IVI7;B1XB59;C5A059;P13024;B7L9E7;Q8X8B9;B7M693;B1LMS6;B6I4N1;B5YZ28;A7ZUA1;B7UNL0;Q8FBE8;A1AI70;B7MI25;B7MQY5;B7NFJ2;B7NUB8;Q0TAG8;Q1R424	Protein FdhE	fdhE	0.467402	1.12704	0.0917919	1252.21	1789.43	30.7219	30.8834	30.5886	30.7483	31.7228	31.3335	30.7723	30.9834	12	12	12	50.5	50.5	50.5	34.688	0	323.31	60462000000	288	1236.97	1385.07	1126.75	1260.05	2492.82	1898.08	1281.35	1485.48	105.967	534.506	0.0846241	0.298701	30.6461	30.8076	30.5128	30.6725	31.6469	31.2576	30.6964	30.9076	30.752	10.6285	39
P24232;Q7ABK6;Q8FF30	Flavohemoprotein	hmp	0.466674	1.18301	0.0904887	283.603	404.477	29.015	28.8782	29.0187	28.9106	29.8403	29.428	28.8662	29.5548	18	18	18	66.2	66.2	66.2	43.867	0	221.66	29273000000	276	295.367	268.378	296.131	274.538	526.387	394.384	266.136	431.001	14.2516	107.712	0.050252	0.266299	28.6005	28.4636	28.6042	28.4961	29.4258	29.0134	28.4517	29.1402	28.6023	8.44708	32
P30177	Uncharacterized protein YbiB	ybiB	0.465655	1.26217	0.0892381	395.436	561.409	29.0499	29.1227	29.0113	29.2375	30.014	29.3983	29.1472	29.7245	12	12	12	54.4	54.4	54.4	35.048	0	323.31	29114000000	247	379.685	399.522	369.563	432.973	745.707	484.558	406.455	608.917	27.9476	148.481	0.0706754	0.264479	28.9592	29.0319	28.9206	29.1468	29.9232	29.3075	29.0565	29.6338	29.1016	9.74651	30
P0AC61;P0AC60;P0AC59	Glutaredoxin 2	grxB	0.465488	1.84344	0.0608855	655.222	918.763	29.2933	29.4062	29.276	29.234	30.1343	29.7486	29.5148	29.6738	13	13	13	67.9	67.9	67.9	24.35	0	116.98	25644000000	196	650.436	703.923	642.564	623.966	1171.98	894.582	759.539	848.956	34.3113	177.883	0.052366	0.193611	29.728	29.8409	29.7106	29.6687	30.569	30.1832	29.9495	30.1085	29.8952	10.4969	18
P00946	Mannose-6-phosphate isomerase	manA	0.465354	1.35185	0.0801439	660.194	932.881	30.1663	30.2352	30.1179	29.9892	30.9524	30.589	30.1147	30.7139	17	17	17	57	57	57	42.849	0	323.31	70017000000	394	677.198	710.697	654.662	598.217	1174.24	910.436	653.188	993.658	47.2985	216.55	0.0716433	0.23213	29.7856	29.8546	29.7373	29.6085	30.5717	30.2083	29.734	30.3332	29.8201	10.9894	43
P0AFZ1	Protein SseB	sseB	0.465075	1.18695	0.0903473	469.247	654.429	29.0324	29.1113	28.7109	29.3237	29.8294	29.4807	29.0716	29.657	5	5	5	29.5	29.5	29.5	28.642	0	139.07	15918000000	153	459.876	486.009	367.175	563.927	803.493	629.429	472.669	712.127	81.1413	140.488	0.172918	0.214672	29.2328	29.3118	28.9113	29.5242	30.0298	29.6811	29.272	29.8574	29.418	9.41574	17
P39180	Antigen 43	flu	0.464441	3.83131	0.0308842	96.2713	133.374	28.7025	28.6962	28.7696	28.6191	29.2268	29.1252	29.0501	29.2431	28	28	28	41.3	41.3	41.3	106.82	0	323.31	35338000000	394	96.5866	96.1621	101.229	91.1075	139.425	129.848	123.195	141.026	4.13739	8.39081	0.0429764	0.0629121	27.004	26.9977	27.0711	26.9206	27.5283	27.4267	27.3515	27.5446	27.2113	6.6865	41
A7ZV28;Q1R3A2;Q0T9N4;P0A8N9;P0A8N8;P0A8N7;C5A1E9;B7UPX7;B7NTL6;B7NG94;B7MSX2;B7MKW2;B7M8S0;B7LC16;B6I264;B5Z2G6;B1XDQ9;B1LQH8;A8A7Q4;B1ITP1	Elongation factor P--(R)-beta-lysine ligase	epmA	0.464368	0.862107	0.123438	491.929	715.767	29.4352	29.5578	29.6241	29.356	30.6357	30.0715	29.402	29.7214	11	11	11	54.8	54.8	54.8	36.976	0	116.36	37444000000	179	471.057	513.31	537.692	445.657	1091.77	735.477	460.234	575.587	41.3449	274.903	0.0840465	0.384068	29.2672	29.3898	29.4561	29.188	30.4677	29.9035	29.234	29.5534	29.423	8.01681	28
Q46856	Alcohol dehydrogenase YqhD	yqhD	0.464015	1.80045	0.0625447	1870.99	2607.79	31.4806	31.7555	31.6378	31.4755	32.2875	32.0953	31.7094	32.1133	22	22	22	75.7	75.7	75.7	42.097	0	323.31	177980000000	749	1730.39	2097.64	1931.73	1724.19	3044.35	2661.02	2031.02	2694.75	179.239	421.759	0.0957992	0.161731	31.1255	31.4004	31.2827	31.1204	31.9324	31.7402	31.3543	31.7582	31.3774	12.5008	69
P76537	Uncharacterized protein YfeY	yfeY	0.463233	2.43375	0.0400727	271.203	375.891	27.9335	27.8819	27.6544	27.8081	28.4904	28.2831	28.0995	28.2579	7	7	7	56	56	56	20.897	0	88.604	9175000000	111	292.953	282.566	240.951	268.34	432.645	374.198	329.073	367.648	22.5504	42.7543	0.0831495	0.113741	28.5888	28.5372	28.3097	28.4634	29.1457	28.9384	28.7548	28.9132	28.6718	5.39232	17
A8A2G0;B7LBE5;Q8XCV3;P76491;B7NNX0;B7N5Q3;B7M5X0;C4ZVI4;B6I7L3;B5YXT1;B1X903;B1LLP5;B1IXQ1;A7ZPA5;A1ADE0;B7MG55;B7MXX0;Q0TFF5;Q1R9C4;Q8FFJ5;B7UFU9	5-deoxynucleotidase YfbR	yfbR	0.460989	0.863334	0.124039	313.236	448.053	27.8928	28.1179	28.1078	28.4232	29.1547	28.8361	28.0635	28.3315	6	6	6	51.8	51.8	51.8	22.694	0	237.11	7640400000	72	261.969	306.686	304.516	379.772	633.78	507.063	295.214	356.153	48.9023	152.515	0.15612	0.340394	28.4291	28.6542	28.6441	28.9595	29.691	29.3724	28.5998	28.8678	28.761	5.97728	7
A7ZHK9;B7M161;P0A7F7;P0A7F6;C4ZRL3;B7UIG8;B7NI80;B7MNY2;B7N7Z0;B7LFY7;B5YZF5;B1XC95;B1LGS1;B1IQM0;A7ZW69;Q1RG71;B7MBA3;Q0TLL4;Q8FL39	S-adenosylmethionine decarboxylase proenzyme	speD	0.460589	0.886847	0.120813	1230.89	1736.31	30.8339	30.2966	30.6118	30.2763	31.3943	30.9925	30.3358	31.1383	10	10	10	48.9	48.9	48.9	30.384	0	323.31	69515000000	349	1529.39	1049.89	1309.19	1035.09	2264.31	1709.07	1079.08	1892.77	235.464	495.298	0.191295	0.285259	30.9491	30.4119	30.7271	30.3916	31.5096	31.1078	30.451	31.2536	30.8381	11.0403	39
A1AIJ2;Q8FB55;Q1R3S5;Q0TA47;P0A7C7;P0A7C6;C5A0V8;B7UPH5;B7NRV3;B7NFV7;B7MJ04;B7M7S7;B7LAW3;B6I5M9;B5Z0B3;B1XC20;B1LPH7;B1IUN1;A8A7B7;A7ZUN5;B7MRE6	Peptidase E	pepE	0.458224	3.16802	0.038814	757.232	1043.2	29.5801	29.6122	29.37	29.5196	29.9682	30.0977	29.8674	29.9816	10	10	10	66.4	66.4	66.4	24.57	0	323.31	30861000000	259	787.872	805.752	680.087	755.217	1033.83	1132.01	963.386	1043.58	55.5229	69.1525	0.0733235	0.0662886	30.0018	30.0339	29.7917	29.9413	30.3898	30.5194	30.289	30.4032	30.1615	9.53916	26
P0ACI8;P0ACI7;P0ACI6	Regulatory protein AsnC	asnC	0.457177	1.31945	0.087841	214.301	300.025	27.1397	27.3701	27.1815	27.0027	27.9373	27.3295	27.3498	27.906	4	4	4	37.5	37.5	37.5	16.887	0	13.13	4124700000	54	208.393	244.883	214.588	189.341	364.271	238.025	241.433	356.37	23.0455	69.7123	0.107538	0.232355	28.1023	28.3328	28.1442	27.9654	28.9	28.2922	28.3125	28.8687	28.3024	6.85798	6
P10908	Glycerophosphodiester phosphodiesterase, cytoplasmic	ugpQ	0.456958	1.07977	0.098408	115.607	164.347	26.9608	26.9651	27.1039	26.9518	27.8845	27.6325	26.8642	27.4282	8	8	8	39.7	39.7	39.7	27.409	0	19.45	2999700000	50	112.729	113.069	124.608	112.023	215.238	180.417	105.356	156.374	6.01655	46.1577	0.0520431	0.280856	27.2247	27.229	27.3678	27.2158	28.1485	27.8964	27.1281	27.6922	27.2984	7.49985	7
B1LK35;B1X8L4;B7N242;C4ZXJ1;P09424;Q8FCB7;A8A660;B7NPA3;B7NEQ1;B7L723;B7M3M7;B1IZJ2;A7ZTE9;B6I3H6;B7ULF5;B7MFG0;B5YW99;Q8XDG9	Mannitol-1-phosphate 5-dehydrogenase	mtlD	0.456923	1.04866	0.100621	470.981	672.804	29.6333	29.5243	29.6047	29.5888	30.6047	30.0279	29.505	30.0411	19	19	19	62.8	62.8	62.8	41.124	0	323.31	53042000000	334	486.036	450.327	476.414	471.146	959.522	640.714	444.295	646.685	15.0863	213.022	0.0320317	0.316618	29.3119	29.2029	29.2833	29.2674	30.2833	29.7065	29.1836	29.7198	29.2976	10.5108	35
B1LF38;B7ND35;Q1R6T4;Q0TD60;P0A7J1;P0A7J0;C4ZQV9;B7UIV5;B7NJQ5;B7N0J6;B7MAC3;Q8FDH9;B7LGI1;B6I413;B5YR87;B1XG46;B1ISB5;A8A4J8;A7ZRS4;A1AFX0;B7LZJ1	3,4-dihydroxy-2-butanone 4-phosphate synthase	ribB	0.452595	2.32455	0.0470039	1005.97	1380.32	29.712	30.0643	29.8285	29.8089	30.3887	30.3347	30.0955	30.4052	10	10	10	50.7	50.7	50.7	23.411	0	259.24	26801000000	238	907.299	1161.15	984.421	971.004	1457.26	1403.13	1186.76	1474.12	108.789	132.545	0.108143	0.0960252	30.2034	30.5557	30.3199	30.3003	30.8802	30.8261	30.5869	30.8966	30.5713	10.4325	32
A8A6A4;B7NEU6;Q0TBG7;P0A7E4;P0A7E3;C4ZXN4;B7NQ04;B7UM49;B7N1U3;B7M4C7;B7L766;B1X976;B1LK79;B1IYV8;Q8XD99;B5YWE0;B7MFK3;A7ZTJ3;B6I3L9	Orotate phosphoribosyltransferase	pyrE	0.451855	1.10046	0.0981034	194.906	274.954	27.5833	27.6549	27.4291	27.4181	28.415	27.8876	27.4462	28.144	9	9	9	50.2	50.2	50.2	23.567	0	44.927	6109000000	85	203.04	213.466	182.256	180.861	363.461	251.24	184.457	300.658	15.999	75.8205	0.0820859	0.275757	28.0652	28.1367	27.9109	27.9	28.8968	28.3694	27.9281	28.6259	28.1009	4.16993	6
P30137;B1IUQ4;A7ZUK8;B6I5K4;Q8FB78;Q1R5V9;Q0TA72;A1AIG4;Q8X6Y0;B5Z089;A8A793	Thiamine-phosphate synthase	thiE	0.451328	0.887444	0.123496	176.984	254.009	27.3502	27.3204	27.3674	27.3734	28.3202	27.7821	27.1088	28.0055	7	7	7	49.8	49.8	49.8	23.015	0	139.36	7581800000	98	176.638	172.988	178.785	179.526	348.375	239.016	149.171	279.475	2.9324	83.2051	0.0165687	0.327568	27.8662	27.8364	27.8835	27.8894	28.8362	28.2981	27.6248	28.5215	27.8864		10
P0ABE3;P0ABE2	DNA-binding transcriptional regulator BolA	bolA	0.450728	1.213	0.0910947	1442.68	2034.76	29.3965	29.412	29.3733	29.455	30.0182	30.338	29.5113	29.5722	5	5	5	72.4	72.4	72.4	11.994	0	97.416	13164000000	73	1429.58	1445.21	1406.59	1489.34	2209.34	2763.71	1549.23	1616.75	34.9148	569.307	0.0242014	0.279791	30.8528	30.8683	30.8296	30.9112	31.4745	31.7943	30.9676	31.0285	30.9394	9.53916	9
P06961;C4ZQX3;B7ND45;B1XG61;B1IRR0;A8A4L0;B7NJR9;B7UIW4;B1LF48;Q8CXX6;Q0TD50;Q8XBL4;B7LZK6;B5YR96;B6I427	Multifunctional CCA protein	cca	0.450007	1.50845	0.0739232	65.3132	90.5668	26.8216	27.1338	26.8576	26.9374	27.7532	27.3388	27.0495	27.4091	17	17	2	51.9	51.9	6.1	46.467	0	81.699	6232700000	147	60.0009	74.657	61.5286	65.0665	115.186	86.1773	70.3771	90.527	6.58054	18.5562	0.100754	0.20489	26.324	26.6362	26.36	26.4398	27.2555	26.8411	26.5519	26.9115	26.594	6.45943	19
Q8X909;P27305;C4ZRN7;Q8FL25	Glutamyl-Q tRNA(Asp) synthetase	gluQ	0.44957	0.941303	0.116907	96.1003	135.603	27.2138	27.1154	27.1726	26.7824	28.0643	27.4316	26.9858	27.6008	8	8	8	34.4	34.4	34.4	34.884	0	60.983	3425700000	60	105.483	98.4553	102.478	77.985	191.332	122.855	89.9155	138.309	12.4153	42.2803	0.129191	0.311795	27.1299	27.0314	27.0886	26.6985	27.9803	27.3476	26.9018	27.5168	27.1092	7.37504	7
P21514	Cyclic di-GMP phosphodiesterase PdeL	pdeL	0.447896	1.05925	0.102363	44.3944	41.7647	25.5884	25.3741	25.4448	26.2011	26.4281	26.0212	26.0344	25.9163	6	6	6	25.4	25.4	25.4	40.724	0	19.262	910930000	18				44.3944	52.0422	39.1424	39.5036	36.3706		6.99314		0.167441				25.8938	26.1208	25.714	25.7271	25.609	25.7271		0
P00960;Q0TBP3;P67026;P67025;C4ZXF0;B7ULC0;B7NP56;B7NEL1;B7N203;B7MER5;Q1R536;B7L6X1;B6I3D0;B5YVL2;B1LJC1;B1IZN3;A8A617;A7ZTA6;A1AHA1;B7M3I2	Glycine--tRNA ligase alpha subunit	glyQ	0.447754	1.14309	0.0971259	3069.01	4315.98	31.8954	32.0216	32.0526	32.1149	32.8533	32.2059	32.0506	32.7658	16	16	16	64.4	64.4	64.4	34.774	0	323.31	189820000000	581	2805.98	3065.37	3132.5	3272.18	5487.21	3487.5	3128.1	5161.13	195.369	1180.89	0.0636585	0.273608	31.816	31.9422	31.9732	32.0355	32.7738	32.1265	31.9712	32.6863	32.0043	11.8463	80
P77395	Chaperedoxin	cnoX	0.446232	1.37486	0.088308	936.346	1301.92	30.3208	30.1713	30.2344	30.054	30.9544	30.8755	30.2661	30.4695	15	15	15	76.4	76.4	76.4	31.791	0	323.31	38754000000	201	1020.09	918.728	960.261	846.303	1589.7	1504.22	981.764	1132.02	73.0378	291.607	0.078003	0.223982	30.3707	30.2213	30.2844	30.104	31.0044	30.9255	30.316	30.5194	30.3434	12.0664	18
A1AC32;B1XHD9;B7MBT0;B7NBM2;B7USP8;C4ZQF5;P76291;Q1RAR3;Q8FGQ5;Q0TGW1;B7NS47;B7MW65;Q8XCH5;B1LD00;B5YR16;B1J0L7;A8A172;A7ZMZ6;B7L7S4;B6I1E9;B7M2G2	tRNA U34 carboxymethyltransferase	cmoB	0.445812	1.01935	0.107848	205.354	290.43	28.3	28.3259	28.0788	28.2841	29.2942	28.7035	28.2778	28.4966	20	20	19	69.7	69.7	67.2	37.006	0	251.98	17405000000	291	212.598	216.477	182.095	210.246	426.444	281.993	209.31	243.973	15.7174	95.411	0.076538	0.328516	28.1309	28.1567	27.9097	28.115	29.1251	28.5343	28.1086	28.3275	28.1438	8.61838	30
P0A9J4;Q8XE72	2-dehydropantoate 2-reductase	panE	0.444733	0.910732	0.122154	219.809	313.577	28.2109	28.2439	28.1191	28.2998	29.2996	28.6542	28.1069	28.5919	8	8	8	44.6	44.6	44.6	33.87	0	134.25	7834500000	98	218.426	223.532	204.823	232.455	468.088	297.92	203.092	285.206	11.551	111.252	0.0525503	0.354783	28.1695	28.2025	28.0776	28.2584	29.2581	28.6128	28.0655	28.5505	28.2304	5.97728	14
P0ABD4;P0ABD3	Bacterioferritin	bfr	0.44406	1.28465	0.0906359	670.985	936.481	29.0144	28.9353	28.8899	28.9213	29.6832	29.3409	28.8877	29.6254	9	9	9	65.8	65.8	65.8	18.495	0	299.77	18765000000	174	706.386	668.315	647.419	661.819	1128.22	887.787	646.436	1083.48	25.1644	219.75	0.0375037	0.234655	29.8459	29.7667	29.7214	29.7528	30.5146	30.1723	29.7192	30.4568	29.8063	11.5694	26
Q1RDU8;Q0TJE3;P0A6I2;P0A6I1;P0A6I0;C4ZQ36;B7UMZ6;B7NM64;B7NAQ9;B7MS25;B7MHL9;B7M839;B7LDA2;B6I8Y2;B5YT44;B1X850;B1LJV3;B1IW21;A7ZYL3;A7ZJZ9;A1A9I7	Cytidylate kinase	cmk	0.443397	1.43016	0.0825249	1745.22	2417.61	30.617	30.6288	30.7987	30.8463	31.54	30.8622	30.964	31.2983	9	9	9	60.4	60.4	60.4	24.746	0	323.31	53247000000	206	1616.66	1630.04	1835.95	1898.21	3085.03	1919.36	2061.26	2604.77	143.099	534.075	0.0819949	0.220911	31.0284	31.0402	31.2101	31.2577	31.9514	31.2736	31.3754	31.7097	31.2656	10.8202	29
P76440;Q8X645	NAD-dependent dihydropyrimidine dehydrogenase subunit PreT	preT	0.442002	0.848218	0.134552	124.197	160.902	27.1864	28.3884	27.4637	27.8409	28.103	28.1727	28.1434	28.2283	9	9	9	27.7	27.7	27.7	44.329	0	171.93	7794400000	104	81.233	188.459	98.6409	128.455	154.326	162.049	158.75	168.483	47.0698	5.96251	0.378994	0.0370568	26.7568	27.9587	27.0341	27.4113	27.6733	27.7431	27.7137	27.7987	27.6935	6.65821	7
P0ADF7;P0ADF6	Phosphogluconate dehydratase	edd	0.440582	2.27411	0.0509641	707.039	970.261	30.8115	30.803	30.8196	30.8494	31.5606	31.1828	31.0914	31.2111	24	24	24	68.3	68.3	68.3	64.638	0	323.31	134770000000	682	702.342	698.199	706.371	721.244	1186.66	910.851	854.406	929.124	10.0404	147.733	0.0142006	0.152261	29.8377	29.8292	29.8458	29.8756	30.5868	30.209	30.1176	30.2373	29.9966	6.76818	73
P30138	Sulfur carrier protein ThiS adenylyltransferase	thiF	0.440214	0.998328	0.116094	103.437	143.822	26.7932	26.548	26.8162	27.0559	27.7127	27.2517	26.7272	27.2825	6	6	5	34.3	34.3	31.1	26.969	0	211.6	4019900000	57	101.896	85.8256	103.552	122.476	193.988	140.471	97.2945	143.535	15.0004	39.5504	0.145019	0.274996	27.0804	26.8353	27.1035	27.3432	28	27.539	27.0144	27.5698	27.2233		9
P0AEY4;P0AEY3	Nucleoside triphosphate pyrophosphohydrolase	mazG	0.440212	1.04038	0.107183	110.814	154.824	27.2611	27.1721	26.9798	26.9036	28.0585	27.3028	27.1307	27.5854	8	8	8	36.5	36.5	36.5	30.412	0	323.31	4182900000	80	125.234	117.67	102.848	97.5045	218.876	128.947	114.307	157.165	12.8524	46.2579	0.115981	0.298778	27.375	27.286	27.0937	27.0175	28.1724	27.4167	27.2446	27.6994	27.3305	2	12
B1XAX4;C4ZX74;P08178;B7MYC7;Q8FF72;Q1R8N9;B7UGN7;B7NQN8;B7N681;B7MHY0;B7M7K3;B7LCN9;B6I571;B1LNF0;B1IWG1;A8A2Z1;Q8XAC5;A7ZPU2;B5Z036;Q0TEY9	Phosphoribosylformylglycinamidine cyclo-ligase	purM	0.438942	1.79808	0.0721873	159.157	218.761	27.9744	27.8256	27.8266	27.8905	28.4631	28.241	27.9971	28.5718	8	8	8	42	42	42	36.854	0	141.01	9189500000	93	169.959	153.146	153.256	160.268	239.305	204.833	172.681	258.223	7.93464	37.8451	0.0498541	0.172998	27.8112	27.6624	27.6634	27.7273	28.2999	28.0777	27.8338	28.4086	27.8225	9.13955	9
P0AAT7;P0AAT6	Ribosomal silencing factor RsfS	rsfS	0.43738	1.74493	0.0744458	15212.8	20809.8	32.5373	32.776	32.8319	32.7323	33.3435	33.1999	32.8092	33.2743	6	6	6	44.8	44.8	44.8	11.582	0	175.08	111240000000	225	13352.3	15781.3	16411.3	15306.4	23480.5	21234.9	16153.1	22370.8	1320.3	3237.04	0.0867888	0.155553	34.044	34.2827	34.3386	34.239	34.8502	34.7066	34.3159	34.781	34.3273	7.53138	30
P77625	Hexitol phosphatase A	hxpA	0.436956	1.67372	0.0767843	276.525	379.874	27.8567	28.0578	27.9599	28.0744	28.8122	28.3029	28.2289	28.3527	11	11	11	63.4	63.4	63.4	23.007	0	192.04	10053000000	135	251.921	290.004	270.783	293.39	491.801	344.287	326.91	356.5	19.1872	75.5989	0.069387	0.19901	28.3733	28.5743	28.4764	28.5909	29.3287	28.8194	28.7454	28.8692	28.6682	10.1874	17
P23847	Dipeptide-binding protein	dppA	0.436073	0.683236	0.174139	251.641	361.427	29.2901	29.1947	29.0637	29.4093	30.2676	29.6926	28.8503	29.8916	22	22	22	45.8	45.8	45.8	60.293	0	323.31	32028000000	256	259.707	242.925	221.629	282.303	514.887	344.243	190.866	395.714	25.703	134.303	0.102142	0.37159	28.4167	28.3213	28.1903	28.5359	29.3942	28.8192	27.9768	29.0182	28.4763	11.2738	37
P09394	Glycerophosphodiester phosphodiesterase, periplasmic	glpQ	0.434563	1.21099	0.096531	931.073	1281.55	30.6553	30.7019	30.3215	30.4979	31.369	30.935	30.5534	31.0574	23	23	23	75.4	75.4	75.4	40.843	0	323.31	107800000000	502	1001.05	1034.24	792.425	896.583	1649.93	1217.59	932.128	1326.56	109.472	296.602	0.117576	0.231439	30.3438	30.3904	30.01	30.1864	31.0575	30.6235	30.2419	30.7459	30.3671	10.3421	54
A1AAV3;Q1RC23;P64425;P64424;P64423;C4ZV90;B7URE7;B7NHP3;B7N4F0;B7MUI4;B7MM18;B7LYL2;B7L5A9;B6IA59;B5Z0R2;B1XCH1;B1LG86;B1ISR9;A7ZZT5;A7ZLH2;Q0TI25	Zinc transport protein ZntB	zntB	0.433278	0.97912	0.117481	58.9427	82.0269	26.6697	26.3406	26.337	26.4358	27.2698	27.1366	26.3139	26.7959	7	7	7	24.2	24.2	24.2	36.612	0	25.964	2109700000	48	68.6292	54.5069	54.3697	58.2651	104.471	95.1695	53.4971	74.9697	6.70513	22.6586	0.113757	0.276234	26.5159	26.1869	26.1833	26.2821	27.1161	26.9829	26.1602	26.6422	26.399	4.90689	9
P77376	Uncharacterized oxidoreductase YdgJ	ydgJ	0.432318	0.671309	0.177637	45.0154	47.2973	25.5703	25.5154	26.1308	25.5481	26.7191	26.4485	25.5822	25.7441	7	7	7	31.2	31.2	31.2	38.257	0	29.272	1200800000	36			45.0154		67.9603	56.2299	30.6598	34.3391		17.8089		0.376531			25.9136		26.502	26.2313	25.3651	25.527	25.9136	5.42626	7
Q1RET3;Q0TK45;P60718;P60717;P60716;C4ZWB5;B7UKR9;B7NLY7;B7N9N3;B7MRR5;B7MFQ1;B7M5F5;B7L9H2;B6I137;B5YQH9;B1LKL9;B1IYI0;A7ZXQ4;A7ZJ15;A1A8Q3	Lipoyl synthase	lipA	0.431901	1.56873	0.079151	1465.18	2012.59	30.9682	30.9734	31.1194	31.0144	31.861	31.3434	31.1899	31.4086	17	17	17	53.6	53.6	53.6	36.071	0	323.31	96217000000	369	1412.88	1417.97	1570.58	1459.29	2639.81	1837.31	1650.09	1923.16	73.2737	433.41	0.05001	0.215349	30.836	30.8411	30.9871	30.8821	31.7288	31.2111	31.0576	31.2764	31.0224	11.3907	44
P61887	Glucose-1-phosphate thymidylyltransferase 2	rffH	0.431057	1.73443	0.0776717	839.532	1145.82	30.0016	29.9955	30.2148	30.1155	30.7508	30.7026	30.2989	30.2992	12	9	9	45.7	38.9	38.9	32.734	0	105.26	16481000000	89	792.054	788.706	919.572	857.798	1338.36	1294	975.351	975.569	62.1221	197.548	0.0739961	0.172407	30.0094	30.0033	30.2226	30.1232	30.7586	30.7105	30.3067	30.307	30.2646	5.83289	10
P0ADN4;P0ADN3;P0ADN2	UPF0438 protein YifE	yifE	0.429773	1.26794	0.0924978	10727.6	14690.8	32.4251	32.1898	32.6088	32.3689	33.2604	32.6507	32.8542	32.5464	13	13	13	75.9	75.9	75.9	13.133	0	323.31	117030000000	270	10872.2	9220.78	12364.7	10452.9	19512.3	12732.5	14682	11836.3	1297.03	3426.85	0.120906	0.233265	33.7505	33.5152	33.9342	33.6943	34.5858	33.9761	34.1795	33.8718	33.903	12.839	35
P36928	Uncharacterized chaperone protein YegD	yegD	0.429413	1.58309	0.0787649	177.633	243.334	28.3522	28.4781	28.5189	28.4826	29.2617	28.8577	28.5727	28.8572	20	20	20	62	62	62	49.371	0	323.31	21332000000	264	164.796	179.985	185.198	180.553	311.547	234.785	192.313	234.693	8.87063	49.6784	0.049938	0.204157	27.7671	27.893	27.9338	27.8975	28.6767	28.2726	27.9876	28.2721	27.9607	5.58496	29
P39280	L-lysine 2,3-aminomutase	epmB	0.427161	1.11198	0.10415	155.488	215.38	27.8307	28.0685	27.895	27.8725	28.8778	28.3481	27.9747	28.1748	15	15	15	64.6	64.6	64.6	38.749	0	207.68	9777700000	144	146.108	172.566	152.836	150.442	304.131	209.89	161.596	185.903	11.7208	62.3657	0.0753806	0.289562	27.5952	27.8329	27.6595	27.6369	28.6423	28.1125	27.7391	27.9392	27.786	6.47573	20
A7ZUR1;A8A7D9;B1IUL3;B1LPK4;B1XC38;B6I5Q4;C5A132;P26602;B7N2P6;Q1R3P7;Q0TA23;B7UPK0;B7NS03;B7NFY3;Q8XEC3;B7MJ29;B7M7V2;Q8FB35;B5Z180;A1AIL6;B7LAY7	Chorismate pyruvate-lyase	ubiC	0.42709	0.825278	0.143506	163.623	231.619	27.0055	26.8779	26.9832	26.9326	28.0328	27.3028	26.7802	27.3918	8	8	8	63.6	63.6	63.6	18.821	0	35.691	3488500000	74	170.029	155.504	167.392	161.567	349.046	209.373	145.217	222.841	6.46479	85.2964	0.0395103	0.368262	27.8117	27.6842	27.7894	27.7388	28.839	28.109	27.5864	28.1981	27.8006	8.19476	11
A8A1W9;B1IYX7;B1X7J5;C4ZSI8;P76423;B7M485;B7L9X5;B6HYU5;A7ZNS3;B5YV51;Q8X7G3	Hydroxyethylthiazole kinase	thiM	0.426616	1.1021	0.106979	434.63	600.393	28.6833	28.882	28.9857	28.9676	29.8377	29.3106	28.9852	29.0915	7	7	7	32.4	32.4	32.4	27.339	0	135.53	13053000000	103	377.503	433.859	466.521	460.637	847.115	585.701	466.355	502.402	40.6509	171.907	0.0935298	0.286324	28.9509	29.1497	29.2533	29.2352	30.1054	29.5783	29.2528	29.3592	29.2531	6.75489	17
P0AE28	Protein AroM	aroM	0.426501	0.931468	0.127272	64.7314	89.1894	26.1855	26.2021	25.9639	25.72	26.9719	26.4681	25.9846	26.3528	5	5	5	34.2	34.2	34.2	24.917	0	47.157	1517200000	46	72.1265	72.9702	61.7634	52.0655	125.092	87.9068	62.6655	81.0937	9.86238	26.2022	0.152358	0.293782	26.5869	26.6035	26.3654	26.1214	27.3734	26.8695	26.3861	26.7543	26.5952	6.9542	7
Q1R6H1;Q0TCU2;P0A7G4;P0A7G3;P0A7G2;C4ZSQ8;B7UJ62;B7NKN6;B7NDF3;B7N0V2;B7MB88;B7M075;B7LHN2;B6I1P2;B5YS57;B1XGX9;B1LFR9;B1IQV4;A8A4Y3;A7ZS64;A1AG72	Ribosome-binding factor A	rbfA	0.426136	2.01133	0.0653378	4762.33	6476.81	31.41	31.5098	31.4273	31.4613	32.188	31.8175	31.6532	31.8542	9	9	9	66.2	66.2	66.2	15.154	0	323.31	121750000000	379	4622.38	4956.82	4678.68	4791.43	7969.7	6148.45	5480.6	6308.48	147.484	1057.88	0.030969	0.163333	32.5289	32.6287	32.5462	32.5802	33.3069	32.9363	32.7721	32.9731	32.7004	11.5957	39
A7ZPE7;B7N5U3;Q1R981;Q0TFB5;P0A8B3;P0A8B2;C4ZVM4;B7UFY9;B7NP12;B7MY08;B7MG95;B7M6L2;B7LBI5;B6I4X8;B1X9K4;B1LLT7;B1IXB4;A8A2K1;B5YXX2;Q8X5C4	UPF0115 protein YfcN	yfcN	0.424949	1.49658	0.0875464	323.627	442.552	28.0585	28.0251	28.1159	28.1326	28.7644	28.6802	28.0875	28.4998	8	8	8	50.3	50.3	50.3	21.013	0	162.45	8518800000	74	317.975	310.61	331.019	334.902	521.238	491.388	324.49	433.091	11.3013	86.8034	0.0349209	0.196143	28.7058	28.6724	28.7633	28.7799	29.4117	29.3275	28.7348	29.1471	28.7716	6.10852	9
P0AC71;P0AC70;P0AC69	Glutaredoxin 4	grxD	0.42171	1.25643	0.0968408	7137.82	9726.19	31.7559	31.7793	31.6209	32.001	32.6107	32.2369	31.8337	32.1627	4	4	4	36.5	36.5	36.5	12.879	0	112.64	60198000000	196	6940.7	7055.55	6314.8	8240.24	12627.4	9719.89	7329.41	9228.08	803.807	2191.62	0.112612	0.225332	33.1095	33.1329	32.9745	33.3546	33.9642	33.5905	33.1873	33.5163	33.2709	12.5584	25
A7ZUU5;B7LB19;P0ABL0;C5A163;B7NSN2;B7M7Y3;P0ABK9;B6I5T8;B5Z1D1;B1XCV6;B1LPN5;B1IUI1;Q8CVI1;B7NG13;A1AIR1;B7MJT8;B7N2T7;B7UPN8;Q0T9X8;Q1R3J6;A8A7H1	Cytochrome c-552	nrfA	0.421162	1.05386	0.11568	108.361	145.964	28.1001	28.017	27.4689	27.8334	28.5126	27.9365	28.1009	28.5542	11	11	11	27.2	27.2	27.2	53.702	0	76.2	9933900000	112	126.89	119.716	81.5641	105.274	169.371	113.151	126.957	174.379	19.9989	30.5138	0.184558	0.209049	27.3938	27.3106	26.7626	27.127	27.8062	27.2301	27.3945	27.8478	27.3522		17
Q1R646;Q0TCH5;P0A6K5;P0A6K4;P0A6K3;C4ZUE1;B7UK10;B7NLK6;B7NDQ8;B7N171;B7MCQ2;B7M0Z2;B7LHY3;B6I200;B5YT06;B1X6D9;B1LGP3;B1IQ13;A8A591;A1AGH8	Peptide deformylase	def	0.420293	1.60217	0.0805202	2415.95	3276.44	30.7534	30.7472	30.8506	30.974	31.5027	31.121	30.9471	31.4355	9	9	9	61.5	61.5	61.5	19.328	0	290.32	67374000000	230	2282.95	2273.02	2443.66	2664.17	3857.61	2953.07	2614.54	3680.52	183.031	589.838	0.0757596	0.180024	31.5213	31.5151	31.6185	31.7419	32.2706	31.8889	31.715	32.2034	31.7284	10.5906	21
P0ACM2;P0ACM3;Q8FHD1	HTH-type transcriptional repressor RspR	rspR	0.419449	0.850516	0.141244	251.154	352.477	28.1218	28.0291	28.0528	28.0337	29.1187	28.3925	27.9196	28.4843	6	6	6	40.4	40.4	40.4	26.565	0	201.55	8167200000	105	262.287	245.811	249.919	246.601	527.136	317.028	227.67	338.074	7.63212	125.892	0.0303882	0.357165	28.4308	28.3382	28.3619	28.3428	29.4278	28.7016	28.2287	28.7934	28.3964	7.26679	10
P07024	Protein UshA	ushA	0.418795	0.948193	0.127962	168.359	233.915	28.6845	28.7168	28.5836	28.7447	29.6575	29.0968	28.5668	29.0836	22	22	22	51.6	51.6	51.6	60.823	0	295.8	23272000000	229	168.456	172.305	156.966	175.71	332.936	224.828	155.133	222.763	8.15322	73.5271	0.0484276	0.314332	27.7985	27.8307	27.6976	27.8587	28.7715	28.2108	27.6808	28.1976	27.8447	8.84235	29
B1X9H5;C4ZS02;P05020;B7UP76;B7M937;B7LFZ6;B6I9D9;A7ZKG7;Q1RD95;Q0TJ12;B7MTJ3;B7MIK3;B1LIU8;B1IV40;A7ZZ20;A1A9V7;Q8X8N8;B5YVT2;B7NAT7;B7NL72;Q8FIR2	Dihydroorotase	pyrC	0.418737	0.960303	0.12594	495.278	686.427	29.5021	29.504	29.7181	29.5737	30.5504	29.9586	29.489	29.9749	14	14	14	55.7	55.7	55.7	38.827	0	190.4	39049000000	319	469.911	470.523	546.631	494.047	978.949	646.88	465.611	654.268	36.0324	213.641	0.0727517	0.311236	29.2637	29.2655	29.4797	29.3352	30.3119	29.7202	29.2506	29.7364	29.4074	10.0084	35
P33595;Q8FL80;Q1RGC7;Q0TLR9;A1A7B8;Q8XA02	HTH-type transcriptional regulator SgrR	sgrR	0.418013	0.502085	0.25491	40.5318	41.7519	26.947	26.5173	26.6701	25.2431	26.8286	26.8458	26.751	26.6242	8	8	8	18.3	18.3	18.3	63.974	0	26.346	1646500000	36	47.4268	35.1024	39.0663		43.6513	44.1805	41.3435	37.8324	6.29152	2.88878	0.155224	0.0691892	25.9882	25.5584	25.7112		25.8697	25.8869	25.7921	25.6653	25.7921		5
P77689	FeS cluster assembly protein SufD	sufD	0.4165	0.664981	0.187821	49.3325	70.6093	26.3762	26.518	26.6843	26.615	27.8263	26.6863	26.5196	26.8274	13	13	12	46.3	46.3	42.8	46.822	0	91.278	3287400000	77	43.5893	48.138	54.0827	51.5201	120.307	54.1588	48.1916	59.7795	4.53728	33.468	0.0919734	0.473989	25.8676	26.0094	26.1757	26.1064	27.3177	26.1777	26.011	26.3188	26.1411	7.26679	11
P0ADP7	Ubiquinone biosynthesis accessory factor UbiJ	ubiJ	0.413	0.687767	0.18142	125.104	170.998	26.7631	26.3357	27.0009	27.0103	27.6186	27.4824	26.5248	27.1362	5	5	5	28.9	28.9	28.9	22.152	0	156.44	3034700000	61	121.709	90.234	143.76	144.711	221.54	201.396	103.006	158.05	25.5599	52.5014	0.20431	0.30703	27.3342	26.9068	27.572	27.5815	28.1897	28.0536	27.0959	27.7074	27.5768	6.72792	8
P32157	Protein YiiM	yiiM	0.412959	1.54485	0.0886765	266.437	358.436	28.0187	27.8827	28.1831	28.1972	28.8249	28.3657	28.256	28.487	10	10	10	54.5	54.5	54.5	25.342	0	57.591	6847000000	73	255.923	232.683	287.151	289.988	450.037	326.311	302.174	355.224	27.2861	64.8037	0.102411	0.180795	28.3958	28.2598	28.5602	28.5742	29.202	28.7428	28.633	28.8641	28.6036	6.06609	8
P30750;Q1RFY9;Q0TLD2;P63356;P63355	Methionine import ATP-binding protein MetN	metN	0.410742	0.953157	0.131319	286.792	396.598	28.6939	28.7709	28.7563	28.8076	29.7705	29.1864	28.7604	28.9544	14	14	14	57.4	57.4	57.4	37.788	0	323.31	23306000000	187	274.242	289.436	286.507	296.982	582.78	387.161	287.324	329.126	9.45916	130.698	0.0329827	0.329549	28.4945	28.5715	28.557	28.6083	29.5711	28.987	28.5611	28.7551	28.5899	9.3966	19
P23843	Periplasmic oligopeptide-binding protein	oppA	0.410595	1.26128	0.0982645	1305.25	1773.6	31.69	31.5593	31.6153	31.5742	32.2462	32.0769	31.5235	32.2347	36	36	35	79.2	79.2	79.2	60.898	0	323.31	292950000000	859	1379.89	1259.17	1309.55	1272.4	2036.77	1809.15	1228.03	2020.45	54.1378	378.2	0.0414768	0.213239	30.8022	30.6715	30.7275	30.6864	31.3584	31.1891	30.6357	31.3469	30.7649	12.7065	98
P0AE93;P0AE92;P0AE91	Protein CreA	creA	0.408219	2.4992	0.0582032	883.793	1172.41	28.9851	29.2905	29.3139	29.2741	29.6805	29.6913	29.5902	29.5345	7	7	7	35	35	35	17.108	0	20.252	11895000000	70	748.71	927.239	942.569	916.653	1218.39	1227.62	1143.69	1099.95	90.6816	61.2018	0.102605	0.0522016	29.929	30.2344	30.2579	30.218	30.6244	30.6352	30.5341	30.4784	30.3681	8.79116	8
P75915	Chaperone protein YcdY	ycdY	0.407222	1.24358	0.101083	1107.23	1503.13	29.8801	29.8597	29.8282	29.708	30.685	30.1616	29.8705	30.1878	7	7	7	45.7	45.7	45.7	20.724	0	136.99	29701000000	100	1154.38	1137.99	1113.2	1023.36	2028.08	1405.87	1146.68	1431.89	58.4194	372.898	0.0527617	0.248081	30.5474	30.5269	30.4955	30.3753	31.3522	30.8289	30.5378	30.8551	30.5426	9.07146	15
P0ABV8;P0ABV7;P0ABV6	Tol-Pal system protein TolR	tolR	0.406968	1.20583	0.103298	333.647	447.583	27.824	27.5973	27.4061	27.8382	28.505	27.8982	27.9039	27.9864	5	5	5	35.9	35.9	35.9	15.383	0	10.601	6995700000	72	369.729	315.48	275.942	373.436	595.626	389.442	390.999	414.266	46.7081	99.346	0.139993	0.221961	28.9212	28.6946	28.5033	28.9355	29.6023	28.9954	29.0011	29.0837	28.9654	7.75489	12
P77433	Uncharacterized protein YkgG	ykgG	0.406953	0.666791	0.193341	89.0261	123.912	26.5925	26.4884	26.1948	26.6901	27.5433	27.0135	26.218	26.8187	4	4	4	25.1	25.1	25.1	25.212	0	119.13	1996100000	38	94.7752	88.1126	71.7407	101.476	184.424	127.267	72.9145	111.042	12.7497	46.3296	0.143213	0.373892	26.977	26.8729	26.5793	27.0745	27.9278	27.398	26.6025	27.2032	27.0258	6.08746	5
A8A1P5;B1X6V8;B6I848;B7M400;C4ZSB0;P06986;A7ZNJ3;B7MDH5;B7L9P8;B7NC61;B5YU77;B7MWU0;Q9S5G6;B7UT58;Q8FG51;Q1RA52;B7NQG9;B1IZ53;A1ACN3;Q0TG66;B1LP20	Histidinol-phosphate aminotransferase	hisC	0.406603	1.18224	0.106648	305.545	413.67	29.0749	28.7824	28.8132	28.9371	29.7649	29.0994	29.0159	29.3538	11	11	11	38.8	38.8	38.8	39.349	0	46.58	9425100000	97	343.737	280.102	286.206	312.136	557.258	349.694	329.839	417.89	29.0025	102.885	0.0949203	0.248712	28.8171	28.5247	28.5555	28.6794	29.5072	28.8417	28.7582	29.0961	28.7876	8.40939	15
P69409;P69408;P0DMC8;P0DMC7	Transcriptional regulatory protein RcsB	rcsB	0.406457	0.767	0.166426	1461.96	2024.67	30.482	30.2547	30.2773	30.5944	31.4487	30.7693	30.2365	30.7798	14	14	14	69	69	69	23.67	0	323.31	65607000000	390	1538.42	1312.09	1332.98	1664.37	3027.09	1881.13	1295.43	1895.04	169.225	724.35	0.115752	0.357762	30.9576	30.7303	30.7528	31.0699	31.9243	31.2448	30.712	31.2553	31.0138		42
P22255;Q8FAG5;Q8XCG6	3(2),5-bisphosphate nucleotidase CysQ	cysQ	0.406322	0.761986	0.166183	538.063	750.802	29.1324	29.0737	29.2166	29.2911	30.2633	29.5051	29.0067	29.5641	12	12	12	76.8	76.8	76.8	27.176	0	323.31	23795000000	192	520.123	499.183	551.707	581.24	1148.06	675.2	476.287	703.661	35.9812	283.495	0.0668716	0.37759	29.4087	29.35	29.4929	29.5674	30.5395	29.7814	29.2829	29.8404	29.5301	9.93369	21
P34209	Protein YdcF	ydcF	0.405745	0.938796	0.134058	181.083	248.034	27.7421	27.6399	27.6986	27.9192	28.6653	28.3187	27.9346	27.7041	9	9	9	50.8	50.8	50.8	29.705	0	115.41	5990600000	119	179.601	167.201	174.212	203.319	342.793	268.937	205.518	174.89	15.669	74.3276	0.0865292	0.299666	27.89	27.7878	27.8465	28.0671	28.8132	28.4666	28.0825	27.852	27.9785	7.02237	10
P69430;P69429;P69428	Sec-independent protein translocase protein TatA	tatA	0.405597	0.903187	0.138483	2418.2	3293	29.6431	29.8351	29.7424	30.0836	30.6793	30.488	29.8989	29.8604	5	5	5	39.3	39.3	39.3	9.6639	0	159.3	12593000000	70	2113.27	2417.37	2265.45	2876.72	4365.36	3818.19	2527.83	2460.62	329.928	949.409	0.136435	0.288311	31.411	31.603	31.5103	31.8515	32.4472	32.2559	31.6669	31.6284	31.6476	12.0454	10
A1AHX3;B7MH68;Q8FBN9;Q1R4D1;Q0TAR9;P27838;C4ZZ71;B7UNC2;B7N297;B7NFA9;B7M605;B7L963;B6I4E2;B1XAH3;B1IW97;A8A6R1;A7ZU09;B7NTD8;B5YY53;Q8XAP0;B1LLX7	Iron-sulfur cluster assembly protein CyaY	cyaY	0.405034	0.583505	0.223265	690.973	961.169	28.6065	28.1868	28.6289	28.0173	29.5348	28.7252	28.1384	28.6611	4	4	4	50	50	50	12.212	0	203.59	9090500000	80	807.412	601.83	820.169	534.479	1546.6	877.406	581.777	838.887	144.553	411.761	0.209202	0.428396	30.0368	29.6171	30.0592	29.4476	30.9651	30.1555	29.5687	30.0914	30.048	7.47573	9
A7ZTW7;B6I4A0;Q8XAW1;P0A8R9;C4ZZ35;B7M5B2;B7L8A6;B7UMM1;B5YY14;B1X9Y2;B1LLU0;B1IWY2;A8A6M0;Q0TAV4;B7MGH6;B7N260;B7NF72;B7NU32;P59369;Q1R4H3	HTH-type transcriptional regulator HdfR	hdfR	0.404261	1.05823	0.12042	136.976	187.134	27.4532	27.4956	27.4103	27.449	28.3711	27.859	27.4122	27.7828	10	10	10	40.9	40.9	40.9	31.776	0	149.02	7245100000	119	137.062	141.184	133.002	136.656	260.623	182.094	133.183	172.636	3.34724	53.3758	0.0244366	0.285228	27.5039	27.5462	27.461	27.4997	28.4218	27.9096	27.4629	27.8335	27.5251	7.49185	13
P69828;P69814;P69813	PTS system galactitol-specific EIIA component	gatA	0.404117	0.675449	0.192523	7181.25	9979.22	32.1632	32.4567	31.9803	32.1463	33.2505	32.5747	31.9226	32.6152	10	10	10	71.3	71.3	71.3	16.907	0	323.31	191140000000	358	7012.75	8612.45	6169.49	6930.31	15014.3	9354.41	5925.35	9622.85	1026.87	3755.13	0.142993	0.376295	33.1242	33.4177	32.9412	33.1073	34.2115	33.5357	32.8836	33.5761	33.2709	14.4059	40
P77717	Uncharacterized lipoprotein YbaY	ybaY	0.404117	0.983474	0.129889	272.673	359.608	27.942	27.6053	27.2738	27.9737	28.4213	28.2113	27.8366	27.9421	4	4	4	51.1	51.1	51.1	19.431	0	227.63	4730200000	79	317.174	250.556	198.665	324.295	443.645	382.977	294.609	317.201	59.4742	67.4082	0.218116	0.187449	28.7022	28.3655	28.0341	28.734	29.1815	28.9715	28.5968	28.7024	28.7023	10.8948	11
B7NRH6;B7UGX3;A1AE64;Q1R8K5;Q0TEV8;P0A6M1;P0A6M0;P0A6L9;C4ZXA2;B7N6B4;B7MYG1;B7MIL7;B5Z100;B1XB02;B1IWD4;A8A333;B1LNI2;B7M7N0;A7ZPX0;B6I599;B7LDB9	Co-chaperone protein HscB	hscB	0.403976	1.09424	0.117459	619.713	842.267	29.0997	28.8631	29.0385	28.9166	29.8964	29.2548	29.0252	29.3575	10	10	10	79	79	79	20.595	0	194.09	15625000000	161	672.681	569.972	644.457	591.744	1175.06	749.801	638.497	805.712	47.1672	232.492	0.0761114	0.276031	29.776	29.5394	29.7148	29.5929	30.5727	29.9311	29.7016	30.0338	29.7454	9.94105	21
A7ZJE2;A7ZY23;B1IXL9;B1X797;B6I7S1;B7LB75;B7NA10;C4ZXT8;P52697;Q1REG3;Q8FJR2;Q0TJT3;B7M6D0;B1LM58;Q8X926;B7ULP0;B7MPQ2;B5YRG5;A1A909;B7MGM4;B7NNI9	6-phosphogluconolactonase	pgl	0.403789	1.0944	0.116625	1220.1	1655.3	30.6117	30.8974	30.7416	30.8068	31.6283	31.2801	30.9604	30.8037	13	13	13	78.9	78.9	78.9	36.307	0	323.31	66114000000	371	1093.51	1335.66	1197.64	1253.58	2228.22	1746.17	1395.91	1250.89	101.657	434.866	0.0833185	0.262712	30.47	30.7557	30.5999	30.6651	31.4867	31.1385	30.8187	30.6621	30.7104	11.1052	44
P0AB26	Uncharacterized lipoprotein YceB	yceB	0.402629	0.972111	0.13086	366.654	502.096	28.2292	28.3489	28.1718	28.1468	29.2305	28.5477	28.3008	28.4283	7	7	7	50	50	50	20.5	0	172.52	9818700000	114	367.386	399.503	352.929	346.8	740.597	459.165	386.273	422.35	23.5381	161.762	0.064197	0.322173	28.9121	29.0318	28.8548	28.8298	29.9134	29.2306	28.9837	29.1113	29.0078	9.1472	13
B1XCH3;B6IA61;B7URE9;C4ZV92;P76055;Q8X8Q5;B1ISR7;B7NHP6;B7N4F3;B7LYL5;B7L5B2;B5Z0R4;A7ZLH4;A7ZZT7;Q8FHP6;Q1RC21;Q0TI22;B7MUI7;B7MM21;B1LG84;A1AAV5	tRNA-cytidine(32) 2-sulfurtransferase	ttcA	0.402023	1.53712	0.090204	1666.04	2208.81	31.0154	30.996	31.3829	31.2975	31.8429	31.5954	31.3652	31.4963	14	14	14	47.3	47.3	47.3	35.561	0	185.71	48752000000	225	1481.53	1461.47	1916.25	1804.93	2644.36	2223.65	1892.61	2074.6	229.34	320.377	0.137656	0.145045	30.9037	30.8843	31.2712	31.1857	31.7312	31.4837	31.2535	31.3846	31.2624	7.67242	26
Q46808	Uncharacterized protein YqeB	yqeB	0.399953	0.562592	0.23438	25.8639	36.0549	25.6274	26.259	25.7767	25.9836	27.005	26.5669	26.0638	25.6109	6	6	6	14.6	14.6	14.6	57.681	0	17.626	1167200000	33	20.9013	32.5269	23.2048	26.8228	54.8353	40.3523	28.3709	20.6611	5.06666	14.9129	0.195897	0.413617	24.8179	25.4495	24.9672	25.1741	26.1955	25.7574	25.2543	24.8013	25.2142		4
A7ZU40;B7L996;P0A888;P0A887;C5A009;B7UNG3;B7NFD6;B7M638;B7NV33;B6I4H5;B5YY82;B1XAJ7;B1LM21;B1IW72;A8A6U0;Q1R477;A1AI22;B7MHC0;B7N2E1;Q0TAM1;Q8FBJ0	Ubiquinone/menaquinone biosynthesis C-methyltransferase UbiE	ubiE	0.3994	1.83309	0.0788099	1794.49	2372.09	30.7873	31.1774	30.8492	30.9469	31.5627	31.2415	31.2015	31.3526	16	16	16	67.7	67.7	67.7	28.073	0	323.31	113560000000	444	1603.46	2107.01	1674.44	1793.05	2759.61	2203.78	2142.84	2382.1	222.541	277.582	0.124014	0.11702	31.0167	31.4068	31.0786	31.1763	31.7921	31.4709	31.4309	31.582	31.4188	10.764	48
P04995	Exodeoxyribonuclease I	sbcB	0.397619	1.12083	0.117128	89.7451	121.248	27.5281	27.6732	27.5914	27.7075	28.4458	28.0582	27.5614	28.0252	16	16	16	44	44	44	54.5	0	134.99	10815000000	196	83.7533	92.7104	87.553	94.9638	159.24	121.394	85.7337	118.625	5.05752	30.0643	0.0563542	0.247957	26.8004	26.9455	26.8638	26.9798	27.7181	27.3305	26.8338	27.2976	26.9627		26
Q8XD48;Q1RF67;Q0TKH2;P69504;P69503;C4ZUS3;B7UKE9;B7NIG1;B7N922;B7MQI4;B7MDZ1;B7M3W1;B7L794;B6I0C1;B5Z3X9;B1XFQ6;B1LJM6;B1IZC5;A7ZXC7;A7ZIM8;A1A8D5	Adenine phosphoribosyltransferase	apt	0.397093	0.996863	0.131528	5267.2	7030.9	32.1254	31.762	32.2216	31.7831	32.7878	32.2193	32.0071	32.4663	15	15	14	86.3	86.3	84.2	19.872	0	323.31	111080000000	656	5800.97	4497.94	6205.19	4564.69	9223.82	6195.16	5339.89	7364.75	866.029	1681.1	0.164419	0.239102	32.8533	32.4899	32.9495	32.5109	33.5156	32.9472	32.735	33.1942	32.9002	12.6373	63
P37128;B1XAD8;B1IWJ3;A8A2V7;B1LNB6;A7ZPR0;Q8XBE7;Q8FF87;Q1R8R1;Q0TF11;A1ADX2	GDP-mannose pyrophosphatase	nudK	0.3952	3.07521	0.0483607	319.726	421.956	28.1432	28.0846	28.2076	28.0219	28.6538	28.4501	28.4316	28.5026	6	6	6	45	45	45	21.748	0	44.912	7142100000	75	325.87	312.771	340.909	299.356	465.921	403.983	398.798	419.121	17.7932	30.5516	0.0556512	0.0724047	28.7409	28.6823	28.8053	28.6197	29.2515	29.0478	29.0293	29.1003	28.9173	12.3396	8
P37648	Protein YhjJ	yhjJ	0.391726	1.8019	0.0826491	370.433	491.752	29.6409	29.7538	29.6447	29.6718	30.3336	30.1114	29.7763	30.0569	24	24	24	65.5	65.5	65.5	55.527	0	323.31	44693000000	354	360.799	390.487	361.76	368.687	586.005	501.555	396.674	482.777	13.8234	77.6747	0.0373168	0.157955	28.8863	28.9992	28.8901	28.9172	29.579	29.3568	29.0217	29.3023	29.0105	7.59246	53
Q0TCU6;P0AFB3;P0AFB2;P0AFB1;E4P9W4;D5D1H3;C6EH62;C4ZSQ4;B7NDE9;B1XGX5;A1AG68	Lipoprotein NlpI	nlpI	0.391068	0.726381	0.183202	116.081	160.161	27.183	27.3174	27.4654	27.2056	28.4016	27.6887	27.3716	27.2739	10	10	9	37.1	37.1	37.1	33.62	0	51.777	4601300000	97	107.152	117.727	130.582	108.864	251.504	152.67	122.278	114.193	10.7205	63.1077	0.0923534	0.394025	27.1523	27.2867	27.4347	27.1749	28.3709	27.6579	27.3409	27.2432	27.3138	8.04985	13
A7ZMI2;A8A0Q6;B1IPL3;B1XG21;B7M1C3;C4ZYH6;P08312;B7MVJ3;P67036;B7US97;B7NT62;B7N552;Q0THB4;B7MAS5;B7L6I7;P67037;B5YQ02;B1LE16;B6I8Q7	Phenylalanine--tRNA ligase alpha subunit	pheS	0.390803	1.44317	0.0963915	2687.92	3589.8	31.8932	31.9054	31.9151	31.9531	32.7018	32.2832	32.0069	32.2381	27	27	27	91.1	91.1	91.1	36.831	0	323.31	250080000000	868	2643.72	2666.49	2684.49	2756.97	4656.85	3473.78	2862.88	3365.71	48.9648	759.537	0.0182166	0.211582	31.7309	31.7431	31.7527	31.7908	32.5395	32.1209	31.8446	32.0757	31.8177	12.6847	110
A7ZJZ6;B6I8X9;P23721;C4ZQ33;B7LD99;B7M835;B1X847;B1LJV7;B1IW24;A7ZYL0;B7NM68;B7NAQ6;Q8FJB7;Q0TJE6;B5YT41;Q8XEA7;B7MS22;A1A9I4;Q1RDV1;B7MHL6;B7UMZ3	Phosphoserine aminotransferase	serC	0.390106	0.86393	0.153928	734.502	1003.69	30.2372	30.18	30.1295	30.1642	31.1886	30.5939	30.149	30.3398	15	15	15	51.7	51.7	51.7	39.868	0	323.31	76554000000	459	765.438	735.384	709.862	727.324	1490.08	982.589	719.63	822.452	23.2126	341.836	0.0316032	0.34058	29.9605	29.9033	29.8529	29.8876	30.912	30.3172	29.8724	30.0632	29.9319	11.6339	58
P0ACA5;P0ACA4;P0ACA3	Stringent starvation protein A	sspA	0.389892	1.06408	0.125773	4675.93	6303.92	32.1043	32.1379	32.0736	32.1154	32.9352	32.5284	32.0085	32.5187	16	16	16	73.1	73.1	73.1	24.305	0	323.31	203230000000	912	4663.77	4775.02	4564.72	4700.22	8344.28	6276.1	4361.36	6233.93	87.4147	1627.09	0.0186946	0.258108	32.5416	32.5753	32.511	32.5527	33.3725	32.9657	32.4459	32.9561	32.564	13.0028	104
P0AEW8;P0AEW7;P0AEW6	Guanosine-inosine kinase	gsk	0.388584	1.0693	0.125594	410.44	551.337	29.6774	29.7102	29.592	29.5261	30.4341	30.0612	29.5366	30.0282	17	17	17	63.4	63.4	63.4	48.448	0	323.31	58539000000	364	424.805	434.686	400.158	382.111	721.577	555.782	384.934	543.057	23.8219	137.55	0.0580399	0.249485	29.1196	29.1524	29.0342	28.9683	29.8763	29.5034	28.9788	29.4703	29.136	6.83289	48
P76422	Hydroxymethylpyrimidine/phosphomethylpyrimidine kinase	thiD	0.387556	1.33234	0.101467	619.037	825.597	29.4223	29.4678	29.3927	29.5386	30.2425	29.6914	29.5416	29.8962	9	9	9	59.8	59.8	59.8	28.633	0	158.91	19126000000	134	604.436	623.992	592.021	655.699	1073.36	729.727	657.082	842.218	27.7589	181.89	0.0448421	0.220313	29.6232	29.6687	29.5936	29.7395	30.4434	29.8923	29.7425	30.0971	29.741	7.15987	9
A7ZIE2;B7MD52;Q0TKP7;P36767;C4ZTF1;B7UJL7;B7N8U5;B7NJA9;B7M3N2;B7L548;B6HZJ3;B1XEY2;B1J055;A7ZX42;B5Z2U5;B1LIS7;B7MPF4;Q8FKD5;Q8XEA1	Recombination-associated protein RdgC	rdgC	0.386447	2.64909	0.0627041	587.438	768.886	29.6884	29.6135	29.4564	29.7423	30.0945	29.9691	29.9097	30.0732	14	14	14	43.9	43.9	43.9	33.993	0	323.31	44126000000	255	612.298	581.037	520.531	635.887	813.672	745.305	714.939	801.627	49.9431	46.705	0.0850184	0.0607437	29.6417	29.5669	29.4098	29.6957	30.0478	29.9225	29.8631	30.0265	29.7794	9.52943	36
P77258	N-ethylmaleimide reductase	nemA	0.385968	1.23826	0.112406	220.233	294.331	28.4749	28.4728	28.4048	28.4267	29.2494	28.8715	28.4594	28.7427	18	18	18	75.3	75.3	75.3	39.516	0	323.31	20987000000	221	224.872	224.543	214.109	217.408	386.768	296.858	222.442	271.255	5.34099	68.9239	0.0242515	0.234172	28.211	28.2089	28.141	28.1628	28.9856	28.6077	28.1955	28.4789	28.21	7.61471	27
A7ZS06;A8A4S9;B1XGT1;B5YS06;B7NJY3;C4ZR30;P0AAD8;P0AAD9;B7M023;Q0TCY8;B7UJ20;B7NDA4;B7N0B7;B7MB46;Q8FDC3;B7LH53;B6I491;Q1R6L7;B1IRJ9;A1AG28;B1LFL8	Threonine/serine transporter TdcC	tdcC	0.385917	0.55547	0.249258	153.959	213.933	28.2765	28.5236	27.9907	28.1149	29.3681	28.808	28.2729	28.0003	4	4	4	16.7	16.7	16.7	48.878	0	105.99	5479800000	50	157.884	187.703	129.252	140.996	339.055	229.063	157.492	130.124	25.3806	93.263	0.164853	0.435945	27.7059	27.953	27.4201	27.5443	28.7975	28.2374	27.7023	27.4297	27.7041		6
P0AD57	Octaprenyl diphosphate synthase	ispB	0.385129	0.913807	0.14926	647.434	874.778	29.8379	29.8451	29.6827	29.9015	30.7537	30.215	29.7481	30.0909	10	10	10	45.5	45.5	45.5	35.217	0	185.14	26775000000	217	656.02	659.322	588.488	685.907	1245.65	854.244	616.04	783.176	41.5124	266.65	0.0641183	0.30482	29.7402	29.7474	29.5851	29.8039	30.6561	30.1173	29.6504	29.9933	29.7756	6.62936	26
Q0TEZ0;P0A8F2;P0A8F1;P0A8F0;C4ZX73;B7UGN6;B7NQN7;B7N680;B7MYC5;B7MHX9;B7M7K2;B7LCN8;B6I570;B5Z035;B1XAX3;B1LNE8;B1IWG2;A8A2Z0;A7ZPU1;A1ADZ1	Uracil phosphoribosyltransferase	upp	0.385083	2.05258	0.0750605	6851.71	9034.83	32.4871	32.5721	32.5494	32.5676	33.1736	32.8674	32.7005	32.9752	13	13	13	80.3	80.3	80.3	22.533	0	323.31	396330000000	917	6582	6985.45	6875.6	6963.77	10643.6	8589.69	7642.69	9263.36	185.975	1261.8	0.0271429	0.13966	33.0337	33.1186	33.096	33.1142	33.7201	33.4139	33.2471	33.5217	33.1829	14.0058	108
A1ACN1;B7MDH3;Q1RA54;Q0TG68;P60758;P60757;C4ZSA8;B7UT56;B7NQH1;B7NC59;B7MWT8;B7M3Z8;B7L9P6;B6I846;B1X6V6;B1LP22;B1IZ55;A8A1P3;A7ZNJ1;B5YU75;Q8X8T4	ATP phosphoribosyltransferase	hisG	0.383822	1.02095	0.134934	267.755	357.571	28.6661	28.3458	28.4956	28.3914	29.3102	28.6826	28.4775	28.9638	12	12	12	46.2	46.2	46.2	33.366	0	118.78	14243000000	163	304.996	243.722	270.676	251.625	478.791	308.534	267.274	375.686	27.2837	92.3414	0.101898	0.258246	28.6463	28.326	28.4758	28.3716	29.2904	28.6628	28.4578	28.9441	28.5611	8.97728	18
Q1R5D9;Q0TBX9;P33593;Q8X5U1;Q8FCN0	Nickel import ATP-binding protein NikD	nikD	0.383285	1.12199	0.122085	210.254	280.827	27.7212	27.8522	27.8418	27.8577	28.4307	28.519	27.7447	28.1116	10	10	9	52.8	52.8	46.1	26.812	0	87.898	8227400000	80	196.299	215.145	213.584	215.988	322.578	343.172	199.553	258.005	9.35635	65.2085	0.0445002	0.232201	28.0169	28.1479	28.1375	28.1535	28.7264	28.8148	28.0404	28.4073	28.1507		8
Q8X769;Q8FHA7;P05042	Fumarate hydratase class II	fumC	0.382567	0.308647	0.42232	38.1439	53.4213	26.687	26.3841	25.3727	26.4203	27.4368	27.0344	25.4308	26.4923	10	10	10	33.6	33.6	33.6	50.461	0	104.36	2401100000	61	50.2385	40.639	20.0169	41.6813	84.926	64.0746	20.8482	43.8363	12.8271	27.4403	0.336282	0.513659	26.0704	25.7675	24.7561	25.8037	26.8203	26.4179	24.8142	25.8757	25.8397	9.96	9
P08331	2,3-cyclic-nucleotide 2-phosphodiesterase/3-nucleotidase	cpdB	0.381688	0.967058	0.140683	174.103	233.973	28.9394	29.0069	28.9933	28.8612	29.8143	29.2377	28.8548	29.4208	31	31	31	65.7	65.7	65.7	70.831	0	323.31	34387000000	413	172.65	181.013	179.299	163.448	318.563	212.754	162.724	241.852	7.96633	65.1772	0.0457565	0.278567	27.8336	27.9012	27.8876	27.7554	28.7085	28.1319	27.749	28.315	27.8944	9.06609	49
P0AEB4;P0AEB3;P0AEB2	D-alanyl-D-alanine carboxypeptidase DacA	dacA	0.381431	1.26131	0.112235	2232.48	2968.37	31.9613	31.9573	31.8674	31.9028	32.6707	32.2866	31.8986	32.3587	27	27	26	65.8	65.8	65.8	44.443	0	323.31	194970000000	795	2293.62	2287.08	2147.67	2201.55	3769	2880.19	2195.01	3029.27	70.4035	645.65	0.031536	0.21751	31.528	31.5239	31.4341	31.4695	32.2374	31.8532	31.4652	31.9253	31.5259	10.9366	103
Q8X8X8;Q1RG08;Q0TLF2;P0A723;P0A722;C4ZRS3;B7UJ82;B7NIE3;B7N848;B7MP41;B7MBG2;B7M1Y4;B7LGP3;B6HZF5;B5Z0G0;B1XD50;B1LGY3;B1IQG0;A7ZWC7;A7ZHS1;A1A7M5	Acyl-[acyl-carrier-protein]--UDP-N-acetylglucosamine O-acyltransferase	lpxA	0.380449	0.853258	0.161224	614.135	831.226	29.4157	29.4297	29.3585	29.4559	30.3183	29.9919	29.3222	29.5492	8	8	8	35.9	35.9	35.9	28.05	0	191.33	16811000000	127	614.287	620.307	590.163	631.782	1155.6	919.494	575.353	674.459	17.5517	260.164	0.0285795	0.312988	29.6463	29.6603	29.5891	29.6865	30.5489	30.2224	29.5528	29.7798	29.6734	10.5372	16
P33218	Inner membrane protein YebE	yebE	0.379765	0.878161	0.157557	260.014	347.194	27.7486	28.115	28.0537	27.8258	28.7849	28.2286	27.8268	28.422	5	5	5	41.6	41.6	41.6	23.687	0	285.36	7857100000	107	226.782	293.101	280.791	239.382	468.495	317.359	239.545	363.377	31.919	95.663	0.122759	0.275532	28.2231	28.5895	28.5282	28.3003	29.2594	28.7031	28.3013	28.8965	28.5589	6.88264	11
P03023	Lactose operon repressor	lacI	0.379133	0.592292	0.234753	67.9436	92.7232	26.6404	26.7184	27.0422	26.4604	27.7662	26.8006	26.5142	27.297	6	6	6	18.9	18.9	18.9	38.59	0	30.548	3060500000	47	63.7591	67.337	84.4694	56.2091	140.236	71.3235	58.3651	100.968	11.9538	36.3494	0.175937	0.392021	26.4108	26.4888	26.8126	26.2308	27.5366	26.5709	26.2846	27.0674	26.5299	2.32193	4
P23256	Protein MalY	malY	0.378911	0.500773	0.283338	70.3024	73.5998	25.6803	27.1668	26.7547	26.9205	26.8948	26.9833	26.8309	27.3289	8	8	8	26.2	26.2	26.2	43.641	0	21.102	2240000000	36		81.402	60.9984	68.5068	67.2865	71.5852	64.3403	91.1873	10.3196	12.0965	0.146789	0.164355		26.7597	26.3476	26.5134	26.4877	26.5762	26.4238	26.9218	26.5134		2
A7ZHS5;B7MP45;Q8FL03;Q0TLE8;P0ABD6;P0ABD5;C4ZRS7;B7UJ86;B7NIE7;B7N852;B7M1Y8;B7LGP7;B6HZF9;B5Z0G4;B1XD54;B1LGY7;B1IQF6;A7ZWD1;B7MBG6;A1A7M9;Q1RG04	Acetyl-coenzyme A carboxylase carboxyl transferase subunit alpha	accA	0.37714	1.81725	0.0871414	2294.21	3011.68	31.5619	31.6715	31.5933	31.6779	32.2717	32.013	31.7409	31.9876	22	22	22	69.9	69.9	69.9	35.241	0	323.31	274390000000	1230	2192.01	2366.76	2240.62	2377.45	3602.99	3005.99	2484.56	2953.17	92.2104	458.604	0.0401927	0.152275	31.4633	31.5728	31.4946	31.5792	32.173	31.9143	31.6422	31.889	31.6107	12.9607	157
P0AG09;P0AG08;P0AG07	Ribulose-phosphate 3-epimerase	rpe	0.376077	0.713427	0.198598	977.907	1325.18	30.0454	29.9369	29.8264	29.7219	30.8355	30.1386	29.6551	30.4059	11	11	11	71.6	71.6	71.6	24.554	0	283.02	51873000000	249	1092.03	1012.13	936.799	870.668	1898.69	1165.63	830.879	1405.52	95.5432	449.131	0.0977017	0.338921	30.4681	30.3595	30.2491	30.1445	31.2581	30.5612	30.0777	30.8285	30.4138	9.12153	20
P00954;P67589;P67588	Tryptophan--tRNA ligase	trpS	0.375683	1.33368	0.107339	3963.42	5207.67	32.3464	32.4892	32.4512	32.6736	33.2265	32.8419	32.5806	32.8142	19	19	18	62	62	62	37.437	0	323.31	202110000000	409	3571.62	3947.28	3843.59	4491.17	6614.01	5052.72	4208.11	4955.81	385.854	1010.67	0.097354	0.194073	32.1605	32.3034	32.2654	32.4877	33.0406	32.656	32.3948	32.6284	32.4413	10.9658	40
P0AB72;P0AB71	Fructose-bisphosphate aldolase class 2	fbaA	0.374767	1.54995	0.0971116	9782.33	12840.7	33.7625	33.7979	33.9636	33.8674	34.5336	34.2166	33.9344	34.2058	26	26	26	77.2	77.2	77.2	39.147	0	323.31	1125000000000	2225	9201.43	9432.34	10592.9	9902.67	15788.4	12645.7	10378.3	12550.4	614.104	2226.74	0.0627769	0.173412	33.5122	33.5476	33.7133	33.6171	34.2833	33.9663	33.6841	33.9555	33.6987	14.5156	258
P06988;Q8FG52;Q8X8T3	Histidinol dehydrogenase	hisD	0.374282	1.32194	0.110079	109.579	143.685	27.4895	27.7107	27.6351	27.8268	28.2998	28.1426	27.6728	28.0441	8	8	8	21	21	21	46.11	0	96.59	6143000000	85	96.521	112.687	106.879	122.23	170.213	152.479	109.739	142.311	10.7628	25.3986	0.0982188	0.176766	27.003	27.2242	27.1486	27.3403	27.8133	27.6561	27.1864	27.5576	27.2823	9.60363	14
P58237;P60596;P60595	Imidazole glycerol phosphate synthase subunit HisH	hisH	0.373178	0.730069	0.195118	146.678	198.33	27.1056	27.0918	26.8504	26.906	27.9517	27.5462	26.8803	27.0684	8	8	7	51	51	40.8	21.595	0	39.724	3243000000	80	158.726	157.205	132.758	138.024	287.031	216.085	135.562	154.641	13.2242	68.3901	0.0901581	0.34483	27.7135	27.6997	27.4583	27.5139	28.5596	28.1541	27.4882	27.6762	27.688	9.55842	10
A8A0T1;B1IPJ0;B1XGK1;C4ZZ96;P18843;B7NT37;A7ZMK7;B6IBG0;B7M1F2;B1LDZ1;B7L6L4;B7MVL9;B7N576;B7USC1;Q8XDZ9;B5YQ27;Q8FH06;Q0TH90;B7MAV1;A1ABS1;Q1RB54	NH(3)-dependent NAD(+) synthetase	nadE	0.371873	1.45459	0.100297	829.914	1091.22	29.9389	29.9544	30.0131	29.9833	30.6711	30.3198	30.0065	30.3797	22	22	22	80.7	80.7	80.7	30.636	0	323.31	91993000000	515	810.499	819.331	853.706	836.12	1353.32	1058.23	849.806	1103.54	19.092	206.732	0.0230048	0.18945	30.0422	30.0577	30.1164	30.0867	30.7745	30.4232	30.1099	30.483	30.1132	11.1176	56
P36938	Phosphoglucomutase	pgm	0.371122	1.23932	0.117497	1662.88	2190.26	31.8329	31.7986	31.9958	31.944	32.6573	32.1361	31.9452	32.3172	31	31	31	67	67	67	58.36	0	323.31	175460000000	644	1592.05	1554.3	1784.36	1720.83	2835.45	1968.63	1722.25	2234.69	107.893	478.328	0.0648829	0.218389	31.0065	30.9722	31.1694	31.1176	31.8309	31.3098	31.1188	31.4908	31.1441	11.2009	81
A1AGB9;B7M0T7;Q1R6B5;Q0TCP1;P0A6L5;P0A6L4;C4ZSW3;B7UJV8;B7MBY7;B7LHT3;B6I1U3;B5YSV2;B1XHJ8;B1IQQ4;A8A535;A7ZSB8;B7NKT6;B1LGJ0;Q8FD58	N-acetylneuraminate lyase	nanA	0.36989	0.709261	0.201606	1524.19	2040.82	30.8579	31.0914	30.6878	31.0483	31.8041	31.3153	30.6609	31.3846	16	16	16	73.1	73.1	73.1	32.593	0	323.31	87579000000	338	1448.85	1706.2	1286.21	1655.51	2810.17	1995.85	1262.25	2095	193.808	633.256	0.127155	0.310295	30.8719	31.1054	30.7018	31.0623	31.8181	31.3294	30.675	31.3986	31.0839	12.5387	34
P0A6W7;P0A6W6;P0A6W5	Transcription elongation factor GreA	greA	0.367887	1.7076	0.0916856	5200.55	6786.56	31.8777	31.8297	31.7357	31.742	32.4898	32.1072	31.9908	32.0688	16	16	15	91.8	91.8	81.6	17.641	0	323.31	197730000000	468	5500.9	5319.03	4980.16	5002.11	8444.14	6459.37	5954.25	6288.46	253.111	1124.79	0.0486701	0.165738	32.7774	32.7294	32.6354	32.6416	33.3895	33.0068	32.8905	32.9685	32.834	12.6806	60
P0ACH0;P0ACG9;P0ACG8	Heat shock protein 15	hslR	0.367181	0.972103	0.14951	1554.04	2066.58	29.9014	29.8988	29.8735	29.8672	30.3944	29.8985	29.9836	30.7331	4	4	4	31.6	31.6	31.6	15.496	0	23.847	13420000000	60	1571.64	1568.8	1541.24	1534.48	2219.52	1568.48	1664.76	2813.58	18.9216	574.734	0.0121758	0.278108	30.9881	30.9855	30.9602	30.9539	31.4811	30.9852	31.0703	31.8198	30.9868	6.06609	9
P45748;B1X6D5;B1IQ17;A8A587;Q8X8F8;Q8FD17;Q1R650;Q0TCH9;B1LGN9;A7ZSH1;A1AGH4	Threonylcarbamoyl-AMP synthase	tsaC	0.367169	1.21338	0.12157	348.756	458.573	28.0889	28.1042	28.2566	28.2364	28.9679	28.5286	28.4037	28.2545	7	7	7	44.2	44.2	44.2	20.767	0	48.694	7927400000	98	328.698	332.247	369.636	364.442	608.239	447.185	409.755	369.111	21.2674	104.748	0.0609809	0.228422	28.7532	28.7686	28.9209	28.9006	29.6322	29.1929	29.068	28.9188	28.9198	9.50581	8
P0A6F1;P0A6F2;Q8FLB1	Carbamoyl-phosphate synthase small chain	carA	0.3668	1.07747	0.135391	1220.22	1610.64	30.9283	30.8622	31.0264	31.0119	31.7298	31.2025	30.9185	31.4451	20	20	19	74.1	74.1	74.1	41.431	0	323.31	148520000000	556	1194.47	1140.51	1279.41	1266.48	2093.58	1447.33	1186.38	1715.27	64.9613	387.661	0.0532375	0.240687	30.5961	30.5301	30.6943	30.6797	31.3976	30.8704	30.5864	31.113	30.687	9.62936	68
P0AFM3;P0AFM2	Glycine betaine/proline betaine-binding periplasmic protein	proX	0.365907	0.820916	0.176015	1378.93	1821.38	31.1697	30.6978	30.9056	30.9136	31.7593	31.2866	30.7799	31.3244	14	14	14	52.1	52.1	52.1	36.022	0	323.31	68191000000	365	1629.13	1170.75	1354.08	1361.76	2461.76	1768.17	1240.02	1815.56	188.727	500.308	0.136865	0.274687	31.0394	30.5675	30.7753	30.7833	31.629	31.1564	30.6496	31.1941	30.9114	13.3012	47
B1J0Z5;B1LHT5;B1XDY2;B7L3Z1;B7NK86;C4ZT96;P04335;B5Z1I3;Q8X7N7;B7N8H0;B7UJC7;Q1RFT1;A1A7V0;B7MC89;Q8FKM5;B7MQ75;Q0TL77	Esterase FrsA	frsA	0.36479	2.37706	0.0759771	397.86	515.674	29.5891	29.5675	29.4854	29.5184	30.0342	29.894	29.689	30.0025	28	28	1	72	72	2.7	47.022	0	323.31	37256000000	340	411.584	405.397	382.762	391.698	562.07	509.511	441.384	549.729	13.052	54.3733	0.0328056	0.105441	29.0744	29.0528	28.9707	29.0037	29.5195	29.3792	29.1742	29.4877	29.1243	8.08215	34
P76569	Uncharacterized protein YfgD	yfgD	0.364656	0.973296	0.15094	711.477	924.656	28.8849	28.4237	28.4162	28.4565	29.1133	28.9061	28.4736	29.147	7	7	7	73.1	73.1	73.1	13.398	0	229.56	12665000000	126	893.487	646.907	643.546	661.967	1048.43	906.829	669.94	1073.43	121.604	184.977	0.170918	0.20005	30.1815	29.7202	29.7128	29.7531	30.4099	30.2026	29.7702	30.4435	29.9758	11.363	15
A7ZL79;B7LY17;Q8X7B6;Q8FHV9;Q0TIA9;P0A879;B7UR67;B7NVN1;B7MUA0;B7L493;B6I9X5;B5YZP1;B1XBL0;B1LH31;B1ITJ4;A7ZZJ7;Q1RCA6;A1AAN1;B7ML77;B7N474	Tryptophan synthase beta chain	trpB	0.364544	1.03901	0.140602	141.144	185.824	27.8384	27.8207	28.0712	27.9786	28.7548	28.3421	27.9892	28.0811	10	10	10	40.3	40.3	40.3	42.983	0	202.35	10744000000	110	132.284	130.653	155.706	145.932	251.282	188.217	147.014	156.782	11.8817	47.0464	0.0841816	0.253178	27.4532	27.4355	27.6861	27.5935	28.3696	27.9569	27.604	27.6959	27.645	9.55075	14
P77539	Uncharacterized zinc-type alcohol dehydrogenase-like protein YdjL	ydjL	0.363286	1.42862	0.106985	38.4188	49.5771	25.9361	25.9528	25.6558	26.1077	26.3461	26.475	26.0071	26.2774	7	7	6	26.3	26.3	24	38.731	0	28.704	1935800000	48	38.7943	39.2511	31.8825	43.7474	51.6939	56.5759	40.7718	49.2666	4.89732	6.61044	0.127472	0.133337	25.7012	25.7179	25.4209	25.8728	26.1112	26.2401	25.7722	26.0425	25.8225		3
P15286	Flagellar regulator flk	flk	0.363281	0.676605	0.214453	58.6935	79.286	26.5712	26.4017	26.4251	26.3883	27.4327	26.7314	26.1895	26.8859	12	12	12	45	45	45	36.668	0	46.091	3483800000	81	63.9581	56.8033	57.7412	56.2713	116.91	71.5516	48.9592	79.7229	3.56195	28.2565	0.0606873	0.356388	26.4153	26.2458	26.2692	26.2324	27.2768	26.5755	26.0336	26.7299	26.3422		5
P22256	4-aminobutyrate aminotransferase GabT	gabT	0.362949	0.845149	0.174773	251.012	331.581	29.0377	28.7598	28.6724	28.8797	29.6287	29.0453	28.72	29.4074	13	13	11	39.7	39.7	31.7	45.774	0	53.631	6522800000	51	287.461	236.636	222.59	257.359	434.798	288.995	230.127	372.402	28.1858	90.2344	0.112289	0.272134	28.5617	28.2839	28.1965	28.4038	29.1528	28.5694	28.244	28.9315	28.4828	9.88417	3
P0AFG0;P0AFG1;P0AA01	Transcription termination/antitermination protein NusG	nusG	0.362003	1.57237	0.0991698	5027.21	6527.06	31.8999	31.875	31.9897	32.0967	32.607	32.3793	32.0648	32.2581	15	15	15	74.6	74.6	74.6	20.531	0	323.31	200850000000	535	4793.27	4710.17	5104.03	5501.36	7863.83	6705.12	5379.74	6159.57	358.684	1044.04	0.0713485	0.159956	32.5807	32.5558	32.6705	32.7775	33.2878	33.0601	32.7456	32.9389	32.7616	12.7603	60
P09147	UDP-glucose 4-epimerase	galE	0.361951	1.51963	0.10212	677.847	883.969	30.0123	29.9302	29.9756	29.9454	30.6883	30.3203	30.1292	30.1734	22	22	22	78.4	78.4	78.4	37.265	0	323.31	80348000000	545	700.059	660.958	682.3	668.072	1123.82	868.592	759.768	783.691	17.2629	166.582	0.0254673	0.188448	29.833	29.7509	29.7963	29.7662	30.5091	30.1411	29.9499	29.9942	29.8915	10.7748	64
P39829	Galactarate dehydratase (L-threo-forming)	garD	0.361792	0.897508	0.164971	63.1823	83.4526	27.1101	27.289	27.0021	27.2786	28.0681	27.348	27.1846	27.5263	12	12	12	36.1	36.1	36.1	56.401	0	67.049	4556200000	78	60.3764	68.4354	55.9789	67.9384	118.079	71.3195	63.6106	80.8013	6.05466	24.1311	0.0958285	0.28916	26.333	26.5119	26.2249	26.5015	27.291	26.5709	26.4075	26.7491	26.5067	8.05528	9
Q8X4Z7;P0ACU3;P0ACU2	HTH-type transcriptional regulator RutR	rutR	0.361074	0.575887	0.254059	106.495	143.61	26.9182	26.5593	26.6757	26.4885	27.5751	27.2275	26.2582	27.0253	7	7	7	37.3	37.3	37.3	23.703	0	23.168	2111900000	72	126.71	98.5553	106.925	93.7877	200.698	157.344	79.8229	136.574	14.5298	50.2193	0.136437	0.349693	27.3917	27.0328	27.1492	26.962	28.0486	27.701	26.7317	27.4988	27.2705		11
P27278	Trifunctional NAD biosynthesis/regulator protein NadR	nadR	0.360194	0.94417	0.157515	146.35	193.159	28.145	28.0144	28.1054	28.2164	28.9557	28.4813	28.0253	28.4597	14	14	14	48.8	48.8	48.8	47.345	0	244.27	10396000000	140	148.71	135.715	144.642	156.334	262.322	188.191	136.757	185.366	8.58809	51.8013	0.0586818	0.26818	27.6204	27.4898	27.5808	27.6918	28.431	27.9567	27.5007	27.9351	27.6561	3.90689	18
P19926	Glucose-1-phosphatase	agp	0.359991	0.751878	0.198862	364.744	486.242	29.3464	29.4736	29.2359	29.432	30.253	29.7828	29.1344	29.7577	16	16	16	54.2	54.2	54.2	45.682	0	323.31	31311000000	240	357.557	390.859	330.938	379.623	674.553	485.312	308.227	476.878	26.4445	149.71	0.0725014	0.307891	28.8734	29.0006	28.7629	28.9589	29.78	29.3097	28.6614	29.2847	28.9798	10.4168	25
Q8X8B5;Q8FBE5;A1AI75;Q1R420;Q0TAG5;P32177;C5A063;B7NUB4;B7NFJ6;B7MQY8;B7MI29;B7M697;B7L9F1;B6I4N6;B5YZ31;B1XB63;B1IVI3;B7UNL4	Sulfur carrier protein FdhD	fdhD	0.359431	1.00876	0.149429	104.797	137.943	27.1268	27.0019	26.9454	26.9681	27.848	27.4319	27.1575	27.0424	4	4	4	22.4	22.4	22.4	30.532	0	126.92	2633600000	32	113.548	104.036	100.001	101.604	188.141	140.587	116.014	107.031	6.06535	36.3467	0.057877	0.263491	27.2351	27.1101	27.0536	27.0763	27.9563	27.5402	27.2658	27.1507	27.1929	1	2
P09551	Lysine/arginine/ornithine-binding periplasmic protein	argT	0.357419	0.95688	0.157827	133.157	173.11	27.0478	27.1562	27.5035	27.166	27.9739	27.5509	27.1748	27.6036	7	7	7	35.8	35.8	35.8	27.991	0	42.112	4782500000	78	117.294	126.545	161.372	127.417	224.328	166.822	128.204	173.087	19.3596	39.4943	0.145389	0.228145	27.2814	27.3899	27.7371	27.3997	28.2076	27.7845	27.4085	27.8372	27.5728	12.1526	8
P0A908	MltA-interacting protein	mipA	0.356869	0.778464	0.193204	3522.83	4681.9	31.9987	31.8692	31.9379	31.7811	32.7867	32.3969	31.7464	32.0844	9	9	9	54	54	54	27.831	0	323.31	141250000000	628	3777.62	3450	3620	3243.69	6558.54	4992.1	3165.75	4011.19	229.186	1456.77	0.0650575	0.31115	32.2406	32.1111	32.1798	32.023	33.0286	32.6388	31.9883	32.3263	32.2102	12.7398	72
Q8XAK8;Q8FDE5;Q1R6P6;Q0TD22;P42596;B5YRC4;B1XG88;B1LFI2;B1IRN3;A1AG02;A7ZRW7;A8A4P1	Ribosomal RNA large subunit methyltransferase G	rlmG	0.355917	2.16569	0.0877386	336.237	433.809	29.1706	29.1433	29.1153	29.1639	29.7374	29.5385	29.3775	29.3634	13	13	13	40.7	40.7	40.7	42.323	0	262.9	34973000000	235	341.502	335.036	328.511	339.899	507.837	441.826	394.715	390.857	5.83816	54.5213	0.0173632	0.12568	28.8078	28.7805	28.7524	28.8011	29.3745	29.1757	29.0146	29.0006	28.9042	3.58496	25
P39377	Isoaspartyl dipeptidase	iadA	0.355903	1.00206	0.151767	283.074	371.295	28.8721	28.7971	28.8323	28.9338	29.5726	29.2745	28.7127	29.299	15	15	15	54.9	54.9	54.9	41.083	0	323.31	21127000000	222	285.54	270.938	277.679	298.139	466.312	378.466	255.383	385.02	11.682	86.9937	0.0412685	0.234298	28.5522	28.4772	28.5123	28.6138	29.2527	28.9546	28.3927	28.9791	28.583	8.99718	22
P0A6A5;P0A6A4;P0A6A3	Acetate kinase	ackA	0.355692	1.29807	0.120979	9166.18	11903.3	33.7509	33.919	33.9886	33.9389	34.639	34.2351	34.0075	34.1386	30	30	30	90.2	90.2	90.2	43.29	0	323.31	1136100000000	2658	8245.55	9275.17	9738.48	9405.5	15355.4	11573	9868.34	10816.5	644.007	2404.75	0.0702591	0.202024	33.3555	33.5236	33.5932	33.5435	34.2436	33.8397	33.6121	33.7431	33.6026	13.0721	317
P14407	Fumarate hydratase class I, anaerobic	fumB	0.355175	0.965281	0.157732	308.277	395.644	29.2162	29.8192	29.6244	29.3887	30.2389	29.6147	29.7481	29.8676	32	21	21	68.1	47.1	47.1	60.105	0	323.31	50165000000	363	247.386	377.339	329.234	279.151	506.222	327.004	359	390.351	57.0523	78.1235	0.185068	0.197459	28.3473	28.9503	28.7555	28.5199	29.37	28.7458	28.8792	28.9987	28.8173	4.70044	32
P0AB04;P0AB03	Uncharacterized protein YcbJ	ycbJ	0.354483	1.37279	0.117802	98.6676	126.929	26.971	27.2194	26.931	27.2569	27.6427	27.6323	27.2954	27.2258	7	7	7	37.4	37.4	37.4	34.487	0	77.72	4222600000	84	90.0283	107.124	87.5395	109.978	144.084	143.036	112.985	107.609	11.517	19.3342	0.116725	0.152324	26.9036	27.1519	26.8635	27.1895	27.5753	27.5648	27.228	27.1584	27.1739		6
A1AJ77;B7LC30;Q1R389;C4ZR48;B7MKX5;B7M8T1;P16384;B6I275;B1XDS2;B1IT35;A8A7R5;A7ZV40;Q8XDN3;B1LQJ1;B5Z2H7;B7MSY4;B7NGA5;B7NTM7;Q8CXV3;B7UQI0;Q0T9M2	tRNA dimethylallyltransferase	miaA	0.354444	1.1318	0.136478	343.56	447.712	28.8014	29.0113	28.9705	28.837	29.6869	29.0909	28.9771	29.2832	19	19	19	71.5	71.5	71.5	35.064	0	273.79	17966000000	260	318.911	369.4	358.975	326.956	592.809	390.556	360.637	446.844	24.4172	103.123	0.0710711	0.230333	28.71	28.92	28.8791	28.7456	29.5955	28.9995	28.8857	29.1918	28.9028	6.52356	20
P0A8X3;P0A8X2;B7NAT2;Q8CW58	Protein YceI	yceI	0.354304	0.365774	0.389051	159.041	152.563	27.0206	25.4263	26.8528	27.28	26.8763	26.9328	27.1232	27.0647	5	5	4	34	34	28.8	20.912	0	57.48	2081100000	30	154.493		137.367	185.262	139.646	145.281	165.993	159.331	24.2694	12.1938	0.152599	0.0799262	27.6749		27.5071	27.9343	27.5306	27.5871	27.7774	27.7189	27.6749	9.17991	6
A7ZHS2;A7ZWC8;B1IQF9;B1XD51;B6HZF6;B7LGP4;B7M1Y5;B7UJ83;C4ZRS4;P10441;B7N849;Q8X8X7;Q8FL07;Q1RG07;Q0TLF1;A1A7M6;B7MP42;B7MBG3;B5Z0G1;B1LGY4;B7NIE4	Lipid-A-disaccharide synthase	lpxB	0.354299	0.938586	0.162959	79.2542	104.031	26.9456	27.1867	27.1374	27.0645	27.9225	27.5265	27.1045	27.1979	13	13	13	43.7	43.7	43.7	42.382	0	115.96	7838900000	197	71.8141	85.02	82.1366	78.0462	142.315	107.856	80.2656	85.6893	5.72617	28.175	0.0722506	0.270831	26.5807	26.8218	26.7725	26.6996	27.5576	27.1616	26.7396	26.833	26.7972	6	25
P0AC14;P0AC13	Dihydropteroate synthase	folP	0.353158	0.711677	0.211328	541.198	715.451	29.0862	29.4771	29.3181	29.523	30.3536	29.4431	29.413	29.6073	12	12	12	67	67	67	30.615	0	323.31	32732000000	251	446.453	586.994	525.154	606.19	1084.35	573.19	561.237	643.028	72.0076	248.564	0.133052	0.347423	29.1905	29.5814	29.4224	29.6274	30.458	29.5474	29.5173	29.7116	29.5644	8.74483	29
P27832;Q8FBQ3	dTDP-fucosamine acetyltransferase	wecD	0.352509	0.586218	0.255533	83.6648	111.544	26.2319	26.4579	26.5776	26.1118	26.944	27.2626	26.0497	26.5328	6	6	6	37.9	37.9	37.9	24.22	0	67.216	1614900000	43	76.6737	89.8218	97.6726	70.491	126.24	157.782	67.4946	94.6585	12.3363	39.07	0.147449	0.350266	26.6743	26.9003	27.02	26.5542	27.3864	27.705	26.4921	26.9752	26.9378	4.9542	5
P0AB92;P0AB91	Phospho-2-dehydro-3-deoxyheptonate aldolase, Phe-sensitive	aroG	0.352387	1.0092	0.153103	999.353	1305.77	30.6117	30.6251	30.4202	30.5304	31.3282	30.9929	30.5104	30.7654	14	14	12	54.9	54.9	51.1	38.009	0	323.31	47376000000	213	1044.07	1053.96	913.085	986.297	1724.23	1363.52	972.609	1162.72	64.792	321.404	0.0648339	0.246141	30.4039	30.4174	30.2125	30.3226	31.1204	30.7852	30.3027	30.5577	30.4107	10.7499	29
P07658	Formate dehydrogenase H	fdhF	0.351271	1.03559	0.150896	29.0378	36.6388	26.0815	26.8282	26.6132	26.6067	26.7841	26.8941	27.0902	26.7662	13	13	13	27.7	27.7	27.7	79.373	0	162.26	3631800000	91	20.8078	35.0973	30.1914	30.0547	34.0292	36.7549	42.1644	33.6068	5.96697	3.93907	0.20549	0.107511	24.8115	25.5582	25.3431	25.3366	25.514	25.6241	25.8202	25.4962	25.5051		12
P0ADS0;P0ADR9;P0ADR8	Pyrimidine/purine nucleotide 5-monophosphate nucleosidase	ppnN	0.350678	0.94478	0.164718	770.03	1007.34	30.6043	30.7274	30.5046	30.5546	31.392	31.0714	30.5413	30.7889	27	27	27	72.7	72.7	72.7	50.971	0	323.31	87376000000	484	772.242	841.8	720.215	745.863	1340.57	1071.05	738.94	878.826	52.3494	260.546	0.0679836	0.258646	29.9732	30.0964	29.8736	29.9235	30.7609	30.4404	29.9102	30.1578	30.0348	9.22159	51
P0A9A0;P0A999;P0A998	Bacterial non-heme ferritin	ftnA	0.350352	1.30059	0.123712	9555.71	12041.1	32.3739	32.9273	33.0178	32.8214	33.1267	33.1533	33.1526	33.1091	12	12	12	72.1	72.1	72.1	19.424	0	323.31	221310000000	293	7064.15	10407.1	11088.1	9663.5	11966.5	12191.8	12185.7	11820.2	1759.98	180.732	0.184181	0.0150096	33.1346	33.688	33.7786	33.5821	33.8875	33.9141	33.9134	33.8699	33.8242	12.3669	37
P28861	Flavodoxin/ferredoxin--NADP reductase	fpr	0.350138	1.01677	0.152475	166.865	216.176	27.3981	27.7087	27.6216	27.4008	28.1298	28.1684	27.518	27.7136	9	9	9	47.6	47.6	47.6	27.751	0	72.777	7519100000	122	151.206	187.939	176.822	151.492	252.373	259.301	164.45	188.58	18.4824	46.9296	0.110763	0.217089	27.6442	27.9548	27.8677	27.6469	28.3758	28.4145	27.7641	27.9596	27.9112	7.59991	15
P45799	ADP compounds hydrolase NudE	nudE	0.349924	1.21802	0.13119	393.49	509.739	28.3919	28.3537	28.2644	28.472	28.9953	28.9138	28.3613	28.6114	10	10	10	75.8	75.8	75.8	21.153	0	170.67	14806000000	153	398.885	388.363	364.812	421.897	608.572	574.83	390.422	465.135	23.6979	100.384	0.0602249	0.196932	29.0296	28.9915	28.9021	29.1097	29.633	29.5515	28.999	29.2491	29.0697	9.14211	22
A1AE82;Q8XA55;Q1R8I4;Q0TET8;P0A826;P0A825;C4ZXC6;B7UGZ1;B7NRK2;B7MYI0;B7MIN5;B7M8A7;B7LDE3;B6I5C4;B5Z123;B1XB26;B1LNK7;B1IVS6;A8A359;A7ZPZ4;B7N6D8	Serine hydroxymethyltransferase	glyA	0.349649	1.16067	0.136674	3508.25	4550.43	32.6687	32.5261	32.6866	32.4942	33.344	32.9767	32.6374	32.816	28	28	28	74.1	74.1	74.1	45.316	0	323.31	266540000000	1114	3690.38	3339.65	3737	3265.96	5921.28	4578.71	3610.51	4091.24	239.88	995.715	0.0683759	0.218817	32.2073	32.0646	32.2252	32.0328	32.8826	32.5153	32.176	32.3545	32.2162	13.3407	137
P77783	Probable dimethyl sulfoxide reductase chain YnfF	ynfF	0.349437	0.606946	0.250053	88.6729	108.057	27.5523	28.8257	28.2357	28.4364	28.479	28.6528	28.7465	28.5696	27	26	24	42.6	42.6	40.1	89.986	0	295.73	24405000000	296	51.3329	125.198	82.833	95.3282	98.2123	110.922	118.448	104.645	30.5872	8.65539	0.344944	0.0801005	26.1012	27.3746	26.7846	26.9853	27.0279	27.2017	27.2954	27.1185	27.0732		25
P75946	Uncharacterized protein YcfL	ycfL	0.347523	0.616284	0.249186	194.76	212.586	25.8373	26.9133	26.6054	26.7764	27.206	26.7929	26.6495	26.8741	5	5	5	62.4	62.4	62.4	13.981	0	57.617	2248200000	38		215.229	173.491	195.56	264.183	197.829	178.933	209.399	20.8804	36.6184	0.107211	0.172252		28.1484	27.8405	28.0115	28.4411	28.028	27.8846	28.1092	28.028		0
A7ZIF7;B7MPG6;Q1RFD6;Q0TKN6;P0A7G0;P0A7F9;C4ZTG2;B7UJM8;B7NJ97;B7N8V7;B7MD63;B7M3P4;B7L638;B6HZK5;B5Z2W1;B1XEZ3;B1LJF3;A7ZX56;B1J044;A1A875;Q8FKC5	S-adenosylmethionine:tRNA ribosyltransferase-isomerase	queA	0.347061	1.12574	0.140625	767.163	994.638	30.0981	30.235	30.3179	30.2382	30.9902	30.6032	30.3938	30.2902	10	10	10	56.2	56.2	56.2	39.43	0	251.12	36859000000	170	702.214	772.848	819.01	774.581	1311.41	1000.12	863.71	803.313	48.2831	226.656	0.0629372	0.227878	29.8374	29.9743	30.0572	29.9775	30.7295	30.3425	30.1331	30.0295	30.0433	9.80252	20
A7ZM99;B6IB76;P0AGK0;P0AGJ9;C4ZYA0;B7NB91;B7NTZ5;B5Z471;B1XFU9;B1LEP9;B1IQB7;A8A0I0;Q8FH88;B7L5J0;B7M9Z1;B7MVB5;B7URX8;B7M0J4	Tyrosine--tRNA ligase	tyrS	0.346685	2.20648	0.0864885	1499.55	1915.83	31.3361	31.5421	31.4941	31.4239	31.9367	31.8953	31.6424	31.7085	22	22	2	48.1	48.1	4.5	47.526	0	323.31	154740000000	681	1383.48	1598.14	1545.34	1471.25	2106.73	2046.46	1714.44	1795.68	93.2546	190.175	0.0621882	0.0992654	30.8059	31.012	30.964	30.8938	31.4066	31.3651	31.1123	31.1784	31.0621	11.7151	92
B1XET7;P17445;B7M2V6;B1J0W5;Q8FKI8;Q7AH91;B7UJG5;B7N8L4;B7L441;B6I075;B5Z1R1;A7ZWV5;A7ZI51;B1LIJ8;B7MCD1;B7NK50;Q0TKW0	Betaine aldehyde dehydrogenase	betB	0.346298	1.08913	0.147459	102.24	132.565	27.7993	27.8384	27.8032	27.6311	28.5263	28.1285	27.7558	28.0466	13	13	13	37.1	37.1	37.1	52.911	0	260.79	8026600000	114	104.34	107.238	104.629	92.7507	173.593	131.388	101.21	124.068	6.45874	30.2217	0.0631726	0.227977	27.1143	27.1534	27.1182	26.9461	27.8414	27.4435	27.0708	27.3616	27.1358	7.17991	20
Q8XE68;Q8FFR9;Q1R9N2;Q0TFQ3;P33920;C4ZU31;B7UFK3;B7NN01;B7N5F0;B7MXK2;B7MFA1;B7M536;B7LAL0;B6I185;B5YWX9;B1X884;B1LKT5;B1IY83;A8A249;A7ZP10;A1AD43	Nucleoid-associated protein YejK	yejK	0.345154	1.25297	0.131773	536.593	692.026	29.5223	29.7344	29.7142	29.635	30.3767	29.9923	29.7293	29.8883	14	14	14	57	57	57	37.823	0	323.31	48322000000	346	489.369	567.718	559.757	529.529	890.078	680.044	565.683	632.3	35.5216	140.117	0.0661984	0.202473	29.3216	29.5337	29.5136	29.4343	30.176	29.7916	29.5286	29.6876	29.5312	10.1637	58
P0A8D8;P0A8D7;P0A8D6	O-acetyl-ADP-ribose deacetylase	ymdB	0.345086	0.30953	0.438709	160.79	153.147	25.2486	26.4709	27.1209	27.1075	26.6273	27.1949	27.019	26.487	4	4	4	27.7	27.7	27.7	18.88	0	42.551	1538200000	36		116.572	183.756	182.04	130.062	193.526	171.106	117.894	38.3028	35.2549	0.238217	0.230203		27.2726	27.9226	27.9092	27.429	27.9966	27.8208	27.2887	27.8208	6.18982	2
P24173	Lipopolysaccharide heptosyltransferase 1	rfaC	0.344919	1.14346	0.140565	93.4329	120.935	27.1125	27.1324	27.028	26.9927	27.7473	27.5635	27.0421	27.2925	13	13	12	63.3	63.3	62.7	35.543	0	180.93	5680000000	108	96.417	97.7725	90.8813	88.6609	150.376	132.218	91.7798	109.366	4.35964	25.6769	0.0466607	0.21232	27.0015	27.0214	26.917	26.8817	27.6363	27.4525	26.9311	27.1815	27.0115	6.52356	12
A8A2J9;B1X9K2;C4ZVM2;P12008;B7MY06;Q0TFB7;P63610;P63609;B7UFY7;B7NP10;B7N5U1;B7M6L0;B7LBI3;B6I4X6;B5YXX0;B1LLT5;B1IXB6;A7ZPE5;B7MG93;A1ADH8;Q1R983	Chorismate synthase	aroC	0.342805	0.887181	0.178652	242.692	310.486	28.1945	28.6304	28.6467	28.7477	29.2647	28.5295	28.8432	28.953	10	10	10	39.3	39.3	39.3	39.137	0	214.85	14868000000	183	186.601	253.191	256.108	274.87	394.765	235.933	293.88	317.368	38.6087	65.788	0.159085	0.211887	27.9446	28.3804	28.3968	28.4978	29.0148	28.2796	28.5933	28.7031	28.4473	8.87345	23
B7NGX8;C4ZT10;P24215;B1LDQ8;Q1R2J3;Q0T8Y5;B5Z3R0;P0A4R9;A8A847;A7ZVL9;A1AJI8;B7MML2;Q8XEG9;B6I2K2;B7LDX2;B7LXN0;B7NV92;B7UQW0;B7MT80;B1ISA3	Mannonate dehydratase	uxuA	0.341887	0.775834	0.202642	605.543	795.233	30.1422	30.1059	29.9864	30.0486	30.9372	30.5095	29.9047	30.2993	26	26	26	75.9	75.9	75.9	44.838	0	323.31	74900000000	486	636.07	620.077	570.336	595.689	1109.75	822.561	538.608	710.011	28.7505	239.991	0.047479	0.301787	29.6961	29.6597	29.5403	29.6024	30.4911	30.0633	29.4586	29.8532	29.6779	10.8933	62
B7MC29;Q1R669;Q0TCJ7;P0A8T3;P0A8T2;P0A8T1;C4ZSZ5;B7UJZ0;B7NLI5;B7NDN7;B7N0Q3;A1AGF9;B7M0X1;B7LHW6;B6I1X9;B5YSY4;B1XHM8;B1LGM4;B1IQ33;A8A570;A7ZSF3	Ribosomal protein L11 methyltransferase	prmA	0.340938	0.826583	0.193578	663.683	861.589	29.4754	29.7856	29.7009	29.8532	30.555	30.0439	29.9282	29.6519	8	8	8	26.3	26.3	26.3	31.877	0	90.318	26673000000	176	562.878	699.413	659.119	733.322	1198.61	838.03	772.826	636.894	73.731	239.793	0.111094	0.278315	29.5215	29.8317	29.7469	29.8993	30.6011	30.09	29.9743	29.698	29.8655	8.81057	28
A7ZSH6;B7M0Z3;C4ZUE2;B7UK11;B7NLK7;B7NDQ9;P23882;B7LHY8;B1X6E0;B1IQ12;A8A592;Q8X8F1;B5YT07;B1LGP4;B6I201;A1AGH9;B7MCQ3;B7N172;Q0TCH4;Q1R645;Q8FD13	Methionyl-tRNA formyltransferase	fmt	0.340361	1.63795	0.107308	1041.91	1332.95	30.4691	30.4368	30.5144	30.3972	30.9974	30.8442	30.4837	30.8537	14	14	14	63.8	63.8	63.8	34.168	0	323.31	60500000000	359	1052.21	1028.69	1086.12	1000.6	1523.17	1368.22	1063.02	1377.39	36.2501	193.447	0.0347921	0.145127	30.415	30.3827	30.4603	30.3432	30.9433	30.7901	30.4296	30.7996	30.445	10.6321	33
P23305	Uncharacterized protein YigA	yigA	0.340262	1.65686	0.106843	238.882	304.993	28.0122	27.9272	27.9278	28.113	28.5048	28.2412	28.0927	28.5025	9	9	9	48.5	48.5	48.5	26.728	0	77.999	9570400000	118	241.414	227.466	227.573	259.076	340.854	283.408	255.417	340.294	14.9717	42.6454	0.0626738	0.139824	28.3124	28.2274	28.2281	28.4133	28.8051	28.5415	28.3929	28.8027	28.4031	3.58496	16
P65383;P65382;P30745;C4ZXV3;B7ULX8;B7NNL1;B7NA81;B7MQN5;B7MGN9;B7M753;B7LC63;B6I7T6;B5YRM0;B1X7B1;B1LM72;A7ZY37;A7ZJJ0	GTP 3,8-cyclase	moaA	0.339905	1.10692	0.14946	45.8491	58.6648	26.1417	25.8613	26.1944	26.2541	26.8364	26.4024	26.208	26.3644	9	9	8	25.2	25.2	24.9	37.304	0	37.198	1957800000	59	46.5328	38.2372	48.2822	50.3441	75.6833	55.8493	48.7438	54.3827	5.3083	11.7519	0.115778	0.200322	25.961	25.6805	26.0137	26.0734	26.6557	26.2216	26.0273	26.1836	26.0503		7
P63633;P22634;C5A0R6;B1XBX8;B7NU33;B7M723;B7LA65;B6I5I5;A8A775;A7ZUI7;Q8FB89;Q1R3U0;B7MR95;B7MIA7	Glutamate racemase	murI	0.339496	0.99931	0.163505	293.367	380.383	28.4672	28.5703	28.4373	28.5526	29.3324	28.837	28.5622	28.6537	15	15	15	47	47	47	31.074	0	61.786	18511000000	199	285.122	306.456	279.209	302.682	522.528	369.387	304.725	324.893	13.2477	98.5382	0.0451575	0.25905	28.5501	28.6531	28.5202	28.6354	29.4153	28.9199	28.6451	28.7366	28.6491	7.53916	23
P37631	Uncharacterized protein YhiN	yhiN	0.339091	1.5036	0.117793	156.682	200.801	28.1091	28.1367	28.0744	28.1006	28.7486	28.4986	28.3509	28.1791	12	12	12	35.5	35.5	35.5	43.741	0	168.58	12512000000	153	157.09	160.154	153.32	156.164	245.811	206.349	186.064	164.978	2.81594	34.434	0.0179723	0.171484	27.6987	27.7263	27.664	27.6902	28.3382	28.0882	27.9405	27.7687	27.7475	6.50779	13
P23917	Fructokinase	mak	0.338733	0.953951	0.171538	209.044	269.389	27.9525	28.2488	27.945	28.1823	28.9006	28.3552	28.1864	28.2413	10	10	10	46	46	46	32.499	0	210.91	11501000000	125	190.053	233.859	189.047	223.219	369.111	251.951	223.856	232.636	22.9296	67.5094	0.109688	0.250602	27.9707	28.267	27.9632	28.2005	28.9188	28.3734	28.2046	28.2595	28.232	8.06609	15
Q1RG18;Q0TLG2;P0A7F1;P0A7F0;P0A7E9;A7ZWB7;A7ZHR1;A1A7L5	Uridylate kinase	pyrH	0.337879	2.63186	0.0830265	3485.18	4415.91	31.8154	31.6466	31.862	31.8021	32.2528	32.1198	32.0717	32.0334	13	13	13	58.9	58.9	58.9	25.97	0	323.31	110430000000	513	3563.22	3166.02	3681.42	3530.07	4839.95	4409.48	4263.48	4150.73	222.474	301.885	0.0638342	0.068363	32.1572	31.9884	32.2038	32.1438	32.5946	32.4615	32.4134	32.3752	32.2895	9.69523	64
P00909;Q8X7B7	Tryptophan biosynthesis protein TrpCF	trpC	0.337835	0.676593	0.234174	24.6767	29.6495	25.0952	25.7002	25.7404	25.5847	26.2888	25.52	26.0874	25.5756	9	9	9	26.5	26.5	26.5	49.492	0	29.009	1015700000	36		25.6733		23.6801	38.7685	22.6313	33.6697	23.5285	1.40943	7.87484	0.0571159	0.265598		25.1116		24.9961	25.7002	24.9314	25.4988	24.987	25.0539	6.56986	4
P0DUE6;P0AFT6;P0AFT5	Transcriptional regulatory protein BtsR	btsR	0.337548	1.13768	0.148005	148.313	186.643	27.1443	27.62	27.0945	27.4806	27.8399	27.4499	27.616	27.7838	9	9	9	46	46	46	27.399	0	40.842	5224800000	62	128.233	178.907	123.833	162.277	208.691	158.828	178.407	200.646	26.6671	22.5364	0.179804	0.120746	27.4088	27.8844	27.3589	27.7451	28.1044	27.7144	27.8804	28.0482	27.8128	4.32193	7
A7ZNY3;B6I8L0;P0A6C1;C4ZU09;B7M507;B7LAI2;P0A6C2;B5YWV0;B1X857;B1IYB0;A8A222;Q0TFT1;B1LKQ6;B7N5C2;B7NMX3;B7UFH5;Q8FFU0;A1AD18;B7MF74;Q1R9R2;B7MX24	Probable endonuclease 4	nfo	0.33637	1.08939	0.152808	721.491	928.882	29.8384	29.7241	29.9087	29.7717	30.569	30.0584	29.8232	30.1378	13	13	13	57.2	57.2	57.2	31.491	0	323.31	33364000000	222	734.751	678.204	771.799	701.212	1225.41	857.084	726.927	906.105	40.7908	211.651	0.0565367	0.227856	29.9021	29.7877	29.9724	29.8354	30.6327	30.1221	29.8868	30.2015	29.9372	8.13443	26
P0A6W2;P0A6W1;P0A6W0	Glutaminase 2	glsA2	0.336244	0.890613	0.18228	73.3656	94.9664	26.5536	26.7192	26.5447	26.7221	27.2118	27.3336	26.8051	26.5341	12	12	12	45.8	45.8	45.8	33.515	0	89.915	4520600000	84	69.1802	77.6869	68.7523	77.8432	109.679	119.44	82.5037	68.2425	5.08338	23.6989	0.0692883	0.24955	26.5274	26.693	26.5185	26.6959	27.1856	27.3073	26.7789	26.5079	26.6944	3.16993	10
P0AEK2	3-oxoacyl-[acyl-carrier-protein] reductase FabG	fabG	0.335942	1.62292	0.112695	7078.58	9036.59	32.7633	32.8056	32.7573	32.7647	33.3595	32.9874	32.8672	33.2204	14	14	14	71.3	71.3	71.3	25.56	0	323.31	492570000000	1071	7031.19	7242.99	7001.86	7038.28	10674.3	8226.18	7562.11	9683.75	110.738	1406.15	0.0156441	0.155607	33.128	33.1703	33.122	33.1294	33.7242	33.3522	33.2319	33.5851	33.2011	13.1343	150
A7ZII0;B7N8X9;Q1RFB4;Q0TKL6;P0A8E9;P0A8E8;P0A8E7;C4ZTI3;B7NJ71;B7MD84;B7M3R5;B7L660;B6HZM9;B5Z3T2;B1XFL4;B1LJH6;B1J023;A7ZX79;B7MQE1;B7UJP9	UPF0234 protein YajQ	yajQ	0.335576	1.55154	0.116171	3995.68	5092.18	31.5952	31.4274	31.4428	31.4378	32.0427	31.9295	31.549	31.7243	11	11	11	70.6	70.6	70.6	18.344	0	323.31	174530000000	675	4338.79	3857.88	3899.84	3886.21	5935.56	5482.98	4200.9	4749.28	229.407	769.411	0.0574138	0.151097	32.4385	32.2707	32.2861	32.2811	32.886	32.7727	32.3923	32.5676	32.4154	13.3852	79
P46125	Inner membrane protein YedI	yedI	0.334846	0.669765	0.239943	75.5888	99.8986	26.5657	26.6333	26.5556	26.7265	27.6616	26.7787	26.6306	26.7496	7	7	7	25.6	25.6	25.6	32.19	0	159.96	2466200000	55	72.6719	76.1915	72.1604	81.3314	156.529	84.3583	76.0508	82.6564	4.22702	37.9232	0.0559212	0.379617	26.5977	26.6652	26.5876	26.7585	27.6936	26.8107	26.6626	26.7816	26.7119		6
Q1RF98;Q0TKK4;P0A6G9;P0A6G8;P0A6G7;B1J011;A7ZX95;A7ZIJ5;A1A8A6	ATP-dependent Clp protease proteolytic subunit	clpP	0.334437	0.940498	0.175825	8289.79	10720.7	32.9057	32.7806	32.8459	32.8957	33.6115	33.0163	32.7972	33.3406	7	7	6	37.7	37.7	33.8	23.186	0	323.31	196360000000	286	8572.27	7853.65	8220.88	8512.34	14051.2	9262.78	7945.46	11623.4	328.778	2691.64	0.0396607	0.251069	33.411	33.286	33.3512	33.401	34.1168	33.5217	33.3026	33.8459	33.406	13.5634	33
P0ACZ6;P0ACZ5;P0ACZ4	DNA-binding transcriptional activator EvgA	evgA	0.333919	0.898655	0.18286	644.635	834.267	29.1931	29.1725	29.2741	29.0675	30.0007	29.4042	29.1214	29.5165	8	8	7	45.1	45.1	38.2	22.69	0	166.74	14533000000	140	651.179	641.832	689.19	596.34	1146.25	754.884	619.3	816.634	38.1587	223.724	0.0591943	0.268168	29.7296	29.709	29.8107	29.604	30.5373	29.9407	29.6579	30.053	29.7702	6.85798	19
P64583;P64582;P64581	Uncharacterized protein YqjD	yqjD	0.333567	0.759825	0.212143	2679.33	3390.14	30.5331	30.1965	29.8178	30.0602	30.887	30.5597	30.1645	30.3306	4	4	4	39.6	39.6	39.6	11.051	0	305.6	13947000000	80	3441.37	2718.86	2085.68	2471.43	4409.11	3506.25	2658.58	2986.61	570.936	763.716	0.213089	0.225276	32.1075	31.7709	31.3922	31.6346	32.4614	32.1342	31.7389	31.905	31.838	12.9209	14
P0AGE7;P0AGE6	Quinone reductase	chrR	0.33302	0.890349	0.186296	683.166	874.007	29.3043	29.1864	28.9825	28.9185	29.7056	29.5162	28.9462	29.5556	11	11	11	91	91	91	20.375	0	238.17	15650000000	107	784.707	722.568	626.417	598.972	1039.33	910.264	610.719	935.717	85.9694	184.187	0.12584	0.210738	29.9961	29.8782	29.6743	29.6103	30.3974	30.208	29.638	30.2474	29.9371	11.1867	9
Q1RGE4;P0ABZ8;P0ABZ7;P0ABZ6	Chaperone SurA	surA	0.33302	0.820972	0.20149	741.766	959.366	30.5812	30.3272	30.3811	30.4513	31.1156	30.7462	30.2304	30.9807	23	23	23	63.8	63.8	63.8	47.283	0	323.31	123680000000	655	819.75	686.209	712.61	748.495	1191.73	920.17	641.252	1084.31	57.9177	239.678	0.0780808	0.249829	30.0585	29.8045	29.8584	29.9286	30.5928	30.2235	29.7077	30.4579	29.9935	11.3151	86
B1X6P5;C4ZWI9;P50465;Q0TJX8;B6I7Y5;B1IY15;A7ZXX5;A7ZJ95;Q8FJU5;Q1REK9;B7NMR0;B7N9V3;B7MPL0;B7MFX3;A1A8X0;B7LAC0;B7M5M8;Q8X9C6;B7ULJ5;B1LLF1	Endonuclease 8	nei	0.332	1.03957	0.16359	103.72	131.671	26.8215	26.7694	27.1772	27.0515	27.5461	27.4537	27.1986	26.9493	8	8	8	43.7	43.7	43.7	29.845	0	49.695	2979000000	54	93.8284	90.4649	120.362	110.224	155.827	146.071	122.181	102.607	14.057	23.9838	0.135529	0.182149	26.9626	26.9105	27.3183	27.1927	27.6872	27.5948	27.3397	27.0904	27.2555		4
P0AAJ9;P0AAJ8	Hydrogenase-2 operon protein HybA	hybA	0.331995	1.06324	0.161122	316.247	392.567	28.3844	29.1437	28.8308	28.8514	29.1577	29.0109	29.1837	29.1859	12	12	11	42.1	42.1	42.1	36.003	0	323.31	22708000000	272	231.88	394.58	316.968	321.561	398.483	359.568	405.789	406.429	66.5396	22.2927	0.210404	0.0567869	28.2549	29.0141	28.7013	28.7219	29.0282	28.8814	29.0541	29.0564	28.9478	5.08746	30
P0ABV4;P0ABV3;P0ABV2	Biopolymer transport protein ExbD	exbD	0.331614	0.855602	0.195712	553.134	714.846	28.5619	28.3766	28.398	28.3017	29.2344	28.471	28.4324	28.8269	9	9	9	63.8	63.8	63.8	15.527	0	151.89	13137000000	120	614.007	539.317	547.443	511.767	983.236	576.139	560.812	739.199	43.3591	196.292	0.078388	0.274594	29.6457	29.4604	29.4818	29.3855	30.3182	29.5548	29.5163	29.9107	29.5355	8.0607	15
P39172	High-affinity zinc uptake system protein ZnuA	znuA	0.331278	0.787042	0.207603	523.579	680.746	29.5427	29.3804	29.4877	29.4057	30.3148	29.6308	29.3423	29.8536	18	18	18	79.4	79.4	79.4	33.777	0	323.31	35486000000	274	556.514	496.739	535.472	505.592	955.553	591.926	483.653	691.854	27.508	201.971	0.0525383	0.29669	29.5053	29.343	29.4502	29.3682	30.2774	29.5934	29.3048	29.8162	29.4777	9.1472	35
P39161	Uxu operon transcriptional regulator	uxuR	0.331276	1.37295	0.131514	122.373	155.938	27.2633	27.1408	27.0928	27.1962	27.832	27.5168	27.4304	27.2391	11	11	11	43.6	43.6	43.6	29.308	0	45.556	5860000000	118	130.205	119.505	115.55	124.23	193.883	155.488	146.364	128.017	6.31293	27.7564	0.0515878	0.177996	27.4306	27.3081	27.26	27.3635	27.9992	27.684	27.5977	27.4064	27.4185	3.45943	23
P18335;Q8X4S6	Acetylornithine/succinyldiaminopimelate aminotransferase	argD	0.331235	1.07838	0.159338	162.348	205.947	27.8872	28.2456	28.3176	28.1411	28.7884	28.5765	28.1983	28.3533	14	14	1	46.1	46.1	4.4	43.766	0	279.12	11239000000	141	134.405	172.749	181.679	160.56	252.619	217.779	167.114	186.276	20.5414	37.4755	0.126527	0.181967	27.4759	27.8344	27.9064	27.7299	28.3772	28.1653	27.787	27.9421	27.8704	9.01402	16
B1IU99;B1XAN4;B7UQ77;C4ZTN4;P0C960;B7MK90;Q0TII2;P59243;B7NUV4;B7N3Z9;B7MTX1;Q8XDJ7;B7LXA7;Q1RCQ2;B5YXL7;B1LHX3;A1AAB6;B7LGV3	Endo-type membrane-bound lytic murein transglycosylase A	emtA	0.329913	1.00232	0.170537	572.553	735.897	28.9301	29.0057	28.9407	29.0387	29.6615	29.5184	28.9576	29.0974	9	9	8	68	68	63.5	22.226	0	118.27	8974000000	51	553.095	583.131	557.215	596.77	922.971	834.996	563.824	621.799	20.9141	170.729	0.0365278	0.232001	29.4965	29.572	29.5071	29.605	30.2278	30.0848	29.5239	29.6637	29.5885	7.5157	8
P78055;P58423;Q8FJL3	Fructose-6-phosphate aldolase 1	fsaA	0.329837	1.36487	0.131311	123.198	154.916	26.7824	27.0673	26.5958	26.8522	27.3005	27.2587	27.1347	26.9232	6	6	6	45	45	45	22.997	0	39.696	3522800000	60	118.794	145.016	104.239	124.742	170.735	165.811	152.019	131.098	16.9044	17.7451	0.137213	0.114547	27.2996	27.5845	27.1129	27.3694	27.8177	27.7759	27.6518	27.4403	27.5124	6.39232	10
A7ZP83;A8A2D2;B1X8X8;C4ZUA7;P17109;B7M5U7;B7LAT0;B6I7K8;B1IXS2;Q0TFH7;Q8FFL1;B7UFS7;B7MXE7;B7MG32;A1ADB6;B1LLL9;B7NNU4;Q1R9E9;B5YXQ8;B7N5N0;Q8XDX8	2-succinyl-5-enolpyruvyl-6-hydroxy-3-cyclohexene-1-carboxylate synthase	menD	0.329656	1.24625	0.140893	63.9344	81.605	27.417	27.2548	27.2822	27.2882	28.0403	27.4832	27.4672	27.5703	18	18	18	52	52	52	61.297	0	178.95	11113000000	201	68.8135	61.4283	62.6181	62.8778	106.46	72.0765	71.2731	76.6104	3.31336	16.7356	0.0518243	0.205081	26.5198	26.3576	26.385	26.3909	27.143	26.5859	26.5699	26.6731	26.5449	4.24793	22
P0AFP8;P0AFP7;P0AFP6	GTP cyclohydrolase 1 type 2 homolog	ybgI	0.329574	1.07011	0.161074	2527.24	3237.78	31.2999	31.4032	31.4001	31.3946	31.8803	31.6966	31.2629	31.9762	8	8	8	52.6	52.6	52.6	26.892	0	323.31	78659000000	262	2397.54	2577.53	2571.95	2561.95	3599.76	3165.33	2336.36	3849.68	86.7067	664.142	0.0343088	0.205122	31.5913	31.6947	31.6916	31.686	32.1718	31.9881	31.5543	32.2676	31.6931	12.0678	30
P76187	Oxidoreductase YdhF	ydhF	0.328684	0.879994	0.193201	508.951	657.629	29.3933	29.4633	29.3487	29.4351	30.2406	29.7985	29.4042	29.5118	12	12	12	57.7	57.7	57.7	33.675	0	262.09	31045000000	177	502.775	528.015	487.314	517.699	909.92	667.711	506.605	546.28	17.7602	181.622	0.0348957	0.276176	29.3602	29.4302	29.3156	29.402	30.2075	29.7655	29.3711	29.4788	29.4161	8.90087	26
P0AC86	Glycogen phosphorylase	glgP	0.328362	0.837196	0.201727	46.6294	59.9817	27.591	27.4236	27.2719	27.5529	28.2937	27.818	27.5073	27.5338	19	19	18	30.9	30.9	28.6	93.171	0	66.811	8092400000	142	50.9216	45.2895	40.7253	49.5812	83.2884	59.6938	48.0222	48.9226	4.61122	16.4177	0.0988908	0.273711	26.0897	25.9223	25.7706	26.0516	26.7924	26.3167	26.006	26.0325	26.042	6.85798	19
P0AGG3;P0AGG2	Acyl-CoA thioesterase 2	tesB	0.327432	0.821032	0.203153	330.678	426.557	28.6566	28.7301	28.795	28.6936	29.1666	29.2384	28.4631	29.317	11	11	10	53.8	53.8	53.8	31.966	0	312.31	18729000000	153	316.369	333.088	348.582	324.672	452.15	475.447	276.287	502.345	13.7498	102.258	0.0415807	0.23973	28.6986	28.7722	28.8371	28.7356	29.2086	29.2804	28.5051	29.359	28.8046	8.09276	17
Q0TB20;P0C056;P0C055;P0C054;C4ZYW4;B7UMF4;B7NQY7;B7NF04;B7N1Z1;B7MGA8;B7M4H6;B7L831;B6I3S0;B5YX93;B1X9B7;B1LL12;B1IYQ7;A8A6E7;A7ZTP1;A1AHM2	Small heat shock protein IbpA	ibpA	0.325862	1.7712	0.110702	1304.55	1646.66	29.724	29.5917	29.7425	29.578	30.2431	29.8316	29.9538	29.9111	6	6	6	53.3	53.3	53.3	15.774	0	135.8	15886000000	102	1363.38	1242.8	1381.11	1230.91	1960.9	1470.11	1601.37	1554.25	78.6496	216.418	0.0602886	0.131429	30.785	30.6528	30.8035	30.6391	31.3041	30.8927	31.0148	30.9722	30.8481	11.3658	14
Q46851;Q8X529	L-glyceraldehyde 3-phosphate reductase	gpr	0.324953	0.662368	0.250745	267.379	343.789	28.7022	28.9745	28.4815	28.5809	29.5232	29.0575	28.4966	28.9615	19	19	19	69.7	69.7	69.7	38.832	0	323.31	18385000000	243	268.354	324.722	229.938	246.504	476.828	344.161	232.374	321.793	41.3391	100.989	0.154608	0.293754	28.4635	28.7358	28.2429	28.3422	29.2845	28.8189	28.2579	28.7229	28.5932	8.62571	29
A7ZHZ7;B7M267;Q8FKM7;Q0TL78;P0A9M6;P0A9M5;C4ZT95;B7UJC6;B7MQ74;B7N8G9;B7L3Z0;B6I018;B5Z1I2;B1XDY1;B1LHT4;B1J0Z6;A7ZWK1;Q1RFT3;A1A7U9;B7MC88;B7NK87	Xanthine-guanine phosphoribosyltransferase	gpt	0.323515	1.15789	0.155239	2278.71	2877.86	30.5956	30.6016	30.33	30.6994	31.2063	30.9114	30.7775	30.6254	8	8	8	59.2	59.2	59.2	16.97	0	182.83	59798000000	380	2331.18	2341.05	1935.63	2507	3575.02	2908.15	2647.9	2380.38	242.53	512.286	0.106433	0.178009	31.5512	31.5572	31.2856	31.655	32.1619	31.867	31.7331	31.581	31.618	12.4924	48
P0A6D4;P0A6D3;C4ZQ34;B7NAQ7;B7M836;B7LDA0;B6I8Y0;B5YT42;B1X848;B1IW23;A7ZYL1;A7ZJZ7	3-phosphoshikimate 1-carboxyvinyltransferase	aroA	0.322784	0.593295	0.282868	271.768	355.533	29.1211	28.8832	28.9687	28.8839	29.8646	29.1942	28.6622	29.427	16	16	2	42.2	42.2	6.1	46.095	0	323.31	27278000000	281	302.61	256.181	271.976	256.307	509.29	318.498	219.453	374.89	21.8574	120.976	0.0804266	0.340265	28.6351	28.3972	28.4827	28.3979	29.3786	28.7082	28.1762	28.941	28.5589	9.36194	42
P0ACQ8;P0ACQ7	HTH-type transcriptional regulator TdcA	tdcA	0.321558	1.12622	0.161233	61.2619	76.7221	26.1944	26.578	26.6065	26.2679	26.8457	26.693	26.4551	26.9393	7	7	7	26.9	26.9	26.9	34.538	0	34.419	1976000000	57	52.1878	68.2693	69.6462	54.9445	82.3387	73.9914	62.6387	87.9197	8.97496	10.9959	0.146501	0.143321	26.1248	26.5084	26.537	26.1983	26.7761	26.6234	26.3855	26.8697	26.5227		3
P07023	T-protein	tyrA	0.321428	1.70332	0.116798	137.319	172.648	27.8464	27.9119	27.7218	27.9488	28.3561	28.1768	27.9357	28.246	19	19	19	55.5	55.5	55.5	42.042	0	127.86	13221000000	197	136.039	142.417	124.673	146.149	194.375	171.447	144.811	179.958	9.40795	20.8316	0.0685114	0.12066	27.4932	27.5586	27.3686	27.5956	28.0029	27.8236	27.5824	27.8928	27.589	8.96867	23
A7ZML6;A8A0U0;B1IPI2;B1XGK9;B6IBG8;B7M1G0;C4ZZA4;P77581;B7L6M2;B5YQ35;Q8X598	Succinylornithine transaminase	astC	0.32135	0.795193	0.214355	75.6378	96.7447	27.0122	27.0455	26.9173	27.2542	27.7532	27.5678	26.8879	27.3058	5	5	5	22.2	22.2	22.2	43.665	0	39.777	2343500000	32	73.0111	74.7328	68.3162	86.491	122.66	107.723	66.9224	89.6735	7.72694	24.0242	0.102157	0.248326	26.6043	26.6376	26.5094	26.8463	27.3453	27.1599	26.48	26.8979	26.742	7.80736	5
P0A9G9;P0A9G8	Transcriptional regulator ModE	modE	0.321342	0.986761	0.178795	507.126	647.131	29.0581	29.2139	29.2412	29.0935	29.9454	29.3527	29.2194	29.3745	11	11	11	59.5	59.5	59.5	28.281	0	323.31	25642000000	229	474.274	528.933	539.136	486.162	882.755	582.923	530.966	591.88	31.7223	159.361	0.0625531	0.246258	29.2769	29.4327	29.46	29.3122	30.1642	29.5715	29.4382	29.5933	29.4491	8.27612	28
P76507	Uncharacterized protein YfdI	yfdI	0.321312	0.514904	0.317907	229.056	299.489	29.119	28.5394	28.9006	28.9132	29.9241	29.1923	28.7901	28.8511	9	9	9	25.3	25.3	25.3	51.483	0	127.14	13770000000	124	270.23	180.098	231.916	233.982	474.839	284.458	214.648	224.011	37.0792	120.925	0.161878	0.40377	28.4735	27.8939	28.2551	28.2677	29.2786	28.5467	28.1446	28.2055	28.2614	8.28077	20
P0AEU2;P0AEU1;P0AEU0	Histidine-binding periplasmic protein	hisJ	0.320927	1.40477	0.133629	402.829	505.651	28.9688	28.8167	28.9119	28.6192	29.1454	29.0404	28.9947	29.4198	10	10	10	51.2	51.2	51.2	28.483	0	187.03	13244000000	134	442.334	397.653	425.04	346.291	500.558	465.08	450.415	606.551	41.9417	70.4835	0.104118	0.139392	29.1773	29.0252	29.1203	28.8277	29.3539	29.2489	29.2032	29.6282	29.1902	11.7022	22
P0ABT7;P0ABT6;P0ABT5	tRNA-dihydrouridine synthase B	dusB	0.320879	1.28956	0.143333	62.8561	79.5466	26.4345	26.502	26.5911	26.526	27.0578	26.9728	26.4765	26.8299	9	9	8	33.6	33.6	32.7	35.866	0	35.396	3006100000	52	59.4327	62.3081	66.3193	63.3644	91.9489	86.6383	61.2089	78.3901	2.84441	13.4377	0.0452527	0.168929	26.3104	26.3779	26.467	26.4019	26.9337	26.8488	26.3525	26.7059	26.4345	4.45943	7
P0A9R5;P0A9R4	2Fe-2S ferredoxin	fdx	0.318438	0.76387	0.225079	4180.35	5352.79	30.7591	30.9593	31.099	31.0362	31.8099	31.2695	31.1452	30.9028	5	5	5	69.4	69.4	69.4	12.331	0	323.31	31912000000	123	3608.89	4152.12	4578.61	4381.78	7531.99	5159.07	4729.04	3991.05	418.944	1530.78	0.100218	0.285977	32.1754	32.3756	32.5153	32.4525	33.2262	32.6858	32.5615	32.3191	32.4839	12.6533	15
P0A9J7;P0A9J6	Ribokinase	rbsK	0.318323	1.46039	0.133233	646.042	814.4	29.6263	29.7003	29.7781	29.654	30.3162	29.8331	29.85	30.0325	15	15	15	67	67	67	32.29	0	323.31	42734000000	282	617.495	650.327	686.733	629.614	1001	713.734	722.229	820.64	30.3258	133.525	0.046941	0.163955	29.6538	29.7278	29.8056	29.6815	30.3438	29.8606	29.8775	30.06	29.8331	8.91588	33
P33343	Uncharacterized fimbrial-like protein YehD	yehD	0.318245	0.633269	0.269414	176.399	225.388	27.2465	26.871	27.2636	26.8724	27.7456	27.3325	26.8009	27.6475	4	4	4	32.2	32.2	32.2	19.06	0	66.383	2663500000	37	198.739	152.792	201.121	152.943	281.861	211.073	145.476	263.142	27.1889	61.1157	0.154133	0.271158	28.0346	27.6591	28.0516	27.6605	28.5337	28.1206	27.589	28.4355	28.0431		8
P0AA06;P0AA05;P0AA04	Phosphocarrier protein HPr	ptsH	0.316855	1.30614	0.146364	50965.5	63980.5	34.1816	33.9434	34.2447	34.0324	34.4076	34.2199	34.3179	34.7242	9	9	9	85.9	85.9	85.9	9.1193	0	323.31	716790000000	2464	53757.4	45498.8	56182.5	48423.5	62972.7	55215	59138.6	78595.8	4877.11	10245.4	0.0956943	0.160133	36.0332	35.795	36.0963	35.884	36.2592	36.0714	36.1695	36.5757	36.0839	14.0315	346
P0A9Z3;P0A9Z2;P0A9Z1	Nitrogen regulatory protein P-II 1	glnB	0.316019	0.996648	0.181149	1548.97	1968.41	29.5452	29.6516	29.4648	29.58	30.3344	29.8417	29.6823	29.6473	10	10	10	74.1	74.1	74.1	12.425	0	40.3	15426000000	187	1530.83	1649.31	1447.05	1568.68	2660.13	1884.12	1685.11	1644.27	84.0099	472.902	0.0542361	0.240246	30.9505	31.057	30.8701	30.9854	31.7397	31.2471	31.0876	31.0526	31.0548	11.0519	16
Q8X738;Q8CXZ9;P23836	Transcriptional regulatory protein PhoP	phoP	0.315316	1.26721	0.150559	878.399	1106.31	29.8067	29.6998	29.7389	29.8988	30.3682	29.9806	29.8165	30.24	16	16	15	74.4	74.4	74	25.482	0	323.31	43897000000	374	889.928	825.752	848.682	949.231	1318.55	1005.18	896.112	1205.39	54.1753	190.851	0.0616751	0.172512	30.1758	30.0689	30.108	30.2679	30.7373	30.3497	30.1857	30.6091	30.2268	11.6129	46
P25736	Endonuclease-1	endA	0.314964	3.39971	0.0812352	58.1349	72.4358	25.8763	26	26.0549	25.9737	26.2762	26.2543	26.2718	26.3623	5	5	5	26	26	26	26.709	0	19.568	1391100000	30	54.1513	59.0503	61.3643	57.9737	71.6519	70.5621	71.4295	76.0998	3.00899	2.48751	0.0517588	0.0343409	26.1775	26.3012	26.3561	26.275	26.5775	26.5556	26.5731	26.6635	26.4559		1
P61951;P61950;P61949	Flavodoxin 1	fldA	0.314462	0.620573	0.280236	6194.07	7989.59	32.4214	32.1842	32.0202	32.1821	33.1291	32.5874	32.162	32.1872	8	8	8	51.7	51.7	51.7	19.737	0	323.31	159630000000	323	7186.22	6086.39	5426.23	6077.45	11794.6	8071.85	5992.69	6099.27	730.099	2710.81	0.117871	0.339293	33.1591	32.9219	32.7579	32.9198	33.8668	33.3251	32.8997	32.9249	32.9234	13.5783	38
P06987;Q9S5G5;Q8FG50	Histidine biosynthesis bifunctional protein HisB	hisB	0.314031	1.87431	0.116062	244.693	305.381	28.7324	28.6832	28.4895	28.5748	29.1064	28.9946	28.7843	28.8507	13	13	13	45.6	45.6	45.6	40.278	0	323.31	16851000000	196	264.157	255.209	222.85	236.555	343.24	317.39	273.931	286.963	18.5543	31.1225	0.0758268	0.101914	28.441	28.3918	28.1981	28.2834	28.815	28.7032	28.4929	28.5593	28.4669	9.43463	25
B1XFJ2;B7MNI9;P07650;B7LEM8;Q8FA52;B7UR10;B7NW62;B7NH50;B7LXU4;B6I6M9;Q8XB35;B5Z4R4;B1LEI7;B1IS37;A8A8B1;A7ZVS5;B7MTC8	Thymidine phosphorylase	deoA	0.312677	1.1654	0.163389	1019.26	1280.25	30.7326	30.9676	31.0048	30.8387	31.5263	31.1674	30.9098	31.1909	36	36	36	86.8	86.8	86.8	47.207	0	323.31	178020000000	803	912.932	1076.19	1104.61	983.305	1591.38	1237.77	1033.54	1258.3	87.7957	230.907	0.0861368	0.180361	30.2122	30.4472	30.4844	30.3183	31.0059	30.647	30.3894	30.6705	30.4658	10.6036	93
A1AJ96;Q1R369;Q0T9K2;P0A9W2;P0A9W1;P0A9W0;C4ZR68;B7NTP7;B7NGC5;B7MSL0;B7MLJ6;B7M8V1;B7LC45;B6I296;B5Z2J7;B1XDU2;B1LQL1;B1IT15;A8A7T7;A7ZV62;B7UQK0	HTH-type transcriptional regulator UlaR	ulaR	0.312468	1.50697	0.134221	123.688	154.423	27.2176	27.1688	26.9265	27.084	27.6072	27.3349	27.1954	27.5091	9	9	9	47.4	47.4	47.4	27.602	0	142.26	6846900000	125	133.983	129.483	109.276	122.012	176.003	145.451	131.919	164.321	10.8024	19.5841	0.0873359	0.126821	27.4714	27.4227	27.1803	27.3378	27.8611	27.5887	27.4493	27.763	27.4604	5.78136	21
P64636	GMP/IMP nucleotidase YrfG	yrfG	0.312371	0.890745	0.202899	875.3	1105.9	29.9736	29.6321	29.7472	29.738	30.4356	29.9721	29.6911	30.2416	9	9	9	50	50	50	25.399	0	114.36	19932000000	175	1003.6	790.143	856.484	850.973	1386.84	1002.54	823.495	1210.72	90.6616	245.187	0.103578	0.221708	30.3475	30.0059	30.1211	30.1118	30.8094	30.3459	30.065	30.6154	30.2335	7.20945	20
P21517	Maltodextrin glucosidase	malZ	0.311619	1.37769	0.144167	12.2603	13.5768	25.2113	24.9867	25.1162	25.1749	25.4572	25.2624	25.2785	25.7375	8	8	8	15.4	15.4	15.4	69.04	0	26.672	575410000	36	13.0258	11.1302	12.1871	12.6979		13.5007	13.6528		0.828638	0.107544	0.0675872	0.00792119	24.1425	23.9178	24.0474	24.106		24.1936	24.2096		24.1243	0	5
P0AAH9;P0AAH8	Peptide transport system ATP-binding protein SapF	sapF	0.311394	0.725217	0.24419	150.189	190.707	27.7622	27.3689	27.5275	27.4208	28.2867	27.9204	27.3677	27.7503	13	13	13	71.3	71.3	71.3	30.57	0	71.418	6603200000	105	176.95	134.356	150.127	139.322	255.451	197.665	134.239	175.473	19.0167	50.5334	0.126618	0.26498	27.8687	27.4754	27.6339	27.5272	28.3931	28.0268	27.4742	27.8568	27.7453	5.97728	13
Q8FL65;Q1RGA7;Q0TLQ1;P14900;Q8X9Y9	UDP-N-acetylmuramoylalanine--D-glutamate ligase	murD	0.311213	0.779652	0.227568	436.079	552.839	29.8504	29.7287	29.509	29.5619	30.4045	30.0053	29.5177	29.9675	14	14	13	44.1	44.1	44.1	46.933	0	181.37	28951000000	170	495.145	454.696	389.881	404.592	729.803	551.869	392.244	537.44	48.1701	138.257	0.110462	0.250086	29.3384	29.2167	28.997	29.0499	29.8925	29.4933	29.0056	29.4555	29.2775	6.84549	20
P77348	Periplasmic murein peptide-binding protein	mppA	0.311072	1.10983	0.171532	281.42	354.944	29.3929	29.4291	29.4591	29.2949	30.0924	29.6957	29.4158	29.6164	23	23	23	61.8	61.8	61.8	59.899	0	323.31	34496000000	274	280.947	288.144	294.273	262.314	458.481	347.276	285.488	328.53	13.8524	73.7125	0.0492232	0.207674	28.529	28.5651	28.5952	28.431	29.2285	28.8317	28.5519	28.7525	28.5802	7.97728	34
P04693	Aromatic-amino-acid aminotransferase	tyrB	0.310569	0.89671	0.202866	550.906	700.742	29.9314	29.8446	29.8981	29.9024	30.6871	30.2336	29.965	29.933	14	14	14	46.9	46.9	46.9	43.537	0	261.25	30637000000	286	565.354	531.993	552.302	553.975	959.629	698.576	578.795	565.968	13.8782	182.631	0.0251917	0.260625	29.5278	29.4409	29.4944	29.4987	30.2835	29.83	29.5613	29.5293	29.5286	9.80574	38
P0ADL0;P0ADK9;P0ADK8	Uncharacterized protein YibL	yibL	0.310442	0.690224	0.253943	1194.54	1520.77	29.4063	29.4418	29.0407	29.4009	30.2056	29.5203	29.3127	29.4929	6	6	6	52.5	52.5	52.5	13.696	0	102.99	20934000000	140	1258.87	1290.57	974.566	1254.14	2203.04	1363.51	1179	1337.54	147.537	462.098	0.12351	0.303857	30.6711	30.7067	30.3055	30.6658	31.4704	30.7852	30.5775	30.7577	30.6889	10.5887	18
P0A9M3;P0A9M2	Hypoxanthine phosphoribosyltransferase	hpt	0.310257	1.07456	0.176057	3345.25	4205.45	31.2699	31.4281	31.2381	31.4764	31.7882	31.3784	31.4988	31.9881	17	17	16	83.7	83.7	82.6	20.115	0	323.31	109270000000	442	3147.91	3516.78	3078.66	3637.66	4525.26	3396.44	3695.08	5205.01	273.822	819.831	0.081854	0.194945	31.9802	32.1384	31.9484	32.1867	32.4986	32.0887	32.2091	32.6984	32.1626	11.2732	61
P54901	Stationary phase-inducible protein CsiE	csiE	0.310141	0.76074	0.233974	32.6773	39.2798	26.092	25.7084	26.0864	25.9085	26.7589	26.2758	26.0275	25.9737	7	7	7	16.9	16.9	16.9	49.04	0	41.94	1280500000	41	34.0919		33.9595	29.9805	54.3785	38.7726	32.5868	31.3815	2.33641	10.5736	0.0714996	0.269188	25.5166		25.5111	25.3331	26.1835	25.7004	25.4521	25.3983	25.5111		3
A7ZNF6;Q8X8U9;Q8FGA4;Q0TGE0;P36561;C4ZQQ5;B7UT21;B7NR82;B7NC26;B7MWP9;B7MDB8;B7M3C8;B7L917;B6I829;B5YSS1;B1X6T0;B1LPV6;A8A1K6;B1IZQ8	Adenosylcobinamide-GDP ribazoletransferase	cobS	0.310055	0.203569	0.581595	308.536	254.29	28.5558	25.9831	28.3151	28.1306	28.1109	27.8919	28.3342	27.8878	4	4	4	15.4	15.4	15.4	26.395	0	16.033	3459600000	30	357.733		302.256	265.619	261.986	224.749	306.323	224.102	46.3769	38.9471	0.150313	0.15316	28.8741		28.6334	28.4489	28.4292	28.2102	28.6525	28.2061	28.4489		6
P21893	Single-stranded-DNA-specific exonuclease RecJ	recJ	0.309694	1.24886	0.156568	82.4218	103.27	27.6051	27.8625	27.7174	27.6954	28.3371	28.1038	27.8335	27.8447	19	19	18	44	44	44	63.388	0	231.83	12583000000	176	75.8828	90.8731	82.0911	80.8403	126.691	107.6	89.0453	89.7451	6.23948	17.8192	0.0757018	0.172549	26.6594	26.9169	26.7718	26.7498	27.3915	27.1582	26.8879	26.8991	26.8935	4.9542	20
P0ACE1;P0ACE0	Hydrogenase-2 large chain	hybC	0.309207	1.17066	0.166419	917.834	1133.83	30.8647	31.4193	31.0809	31.1594	31.6355	31.4691	31.2581	31.3984	33	33	33	81.7	81.7	81.7	62.49	0	323.31	175360000000	661	754.319	1112.21	877.633	927.174	1294.03	1151.73	993.505	1096.06	148.573	125.303	0.161874	0.110513	29.9396	30.4942	30.1559	30.2343	30.7105	30.5441	30.333	30.4733	30.4032	6.53916	64
A7ZU14;Q0TAR6;P0A6K2;P0A6K1;C4ZZ73;B7UNC6;B7NTD3;B7NFB1;B7MR29;B7MH73;B7M611;B7L969;B5YY56;B1XAH6;B1LLY0;B1IW95;A8A6R7;Q8FBN6	Diaminopimelate epimerase	dapF	0.308206	0.922524	0.201446	271.746	343.445	28.346	28.3419	28.2654	28.4703	28.9665	28.9253	28.3267	28.4379	8	8	8	45.3	45.3	45.3	30.208	0	147.47	12238000000	101	269.504	268.73	254.724	294.026	416.147	404.312	265.898	287.423	16.3328	77.7654	0.060103	0.226428	28.4696	28.4655	28.3891	28.594	29.0901	29.0489	28.4504	28.5616	28.5156	8.29002	10
B1XBE0;P08622;Q8XA65;Q8FLC5;Q1RGI7;B7UI60;B7NHB7;B7N7N9;B7MNM2;B7MAD6;C4ZPU1;B7L4D9;B6HZ11;B5YYA8;B1LFU5;B1IRF9;A7ZVV8;A7ZHA5;B7M0B1	Chaperone protein DnaJ	dnaJ	0.308109	1.96921	0.116017	1962.35	2439.55	31.6796	31.5408	31.5466	31.7266	32.0139	31.8988	31.7486	32.0648	17	17	17	44.4	44.4	44.4	41.1	0	323.31	75081000000	282	2037.77	1849.11	1856.65	2105.88	2575.15	2375.79	2138.57	2668.67	129.47	234.903	0.0659767	0.0962897	31.359	31.2203	31.2261	31.406	31.6933	31.5783	31.428	31.7443	31.417	10.9737	36
P31802	Nitrate/nitrite response regulator protein NarP	narP	0.307045	1.31624	0.152914	848.065	1056.48	29.4838	29.6546	29.7913	29.5539	30.1821	29.9771	29.6799	29.8728	11	11	10	47	47	46.5	23.575	0	323.31	32035000000	295	767.923	865.442	952.347	806.548	1252.11	1084.65	880.896	1008.28	80.2559	155.152	0.0946341	0.146857	29.9652	30.1359	30.2726	30.0353	30.6634	30.4584	30.1612	30.3541	30.2169	9.67243	31
A1AEY1;A7ZQN7;A8A3S9;B1IU47;B1XDK3;B6I6J2;B7LEX4;B7LXL0;C4ZZU9;Q46920;Q8X6S9;Q8FEF7;Q0TE64;B7UHL0;B7MZ90;Q1R7P8;B5Z3F9;B7NVU2;B7MLB5;B1LQY7;B7N728	NADPH-dependent 7-cyano-7-deazaguanine reductase	queF	0.306856	1.22978	0.160857	521.705	653.851	29.4935	29.3381	29.3345	29.4174	30.0422	29.6626	29.4306	29.6755	15	15	15	60.6	60.6	60.6	32.557	0	230.24	25615000000	205	558.035	500.502	499.214	529.07	819.383	628.174	533.974	633.873	27.8658	119.484	0.0534129	0.18274	29.5092	29.3538	29.3501	29.433	30.0578	29.6783	29.4462	29.6912	29.4777	6.52356	16
P32695;Q8X5V6;Q8FB30	tRNA-dihydrouridine(20/20a) synthase	dusA	0.306533	2.48057	0.0981619	500.147	621.02	29.5567	29.6614	29.5688	29.5204	30.0528	29.8197	29.8598	29.801	20	20	19	56.2	56.2	56.2	38.467	0	323.31	43231000000	379	492.807	530.316	497.003	480.46	697.51	592.461	609.352	584.759	21.3031	52.0174	0.0425938	0.0837612	29.3316	29.4364	29.3437	29.2954	29.8278	29.5947	29.6348	29.576	29.5062	8.76819	56
P39263	Putative basic amino acid antiporter YfcC	yfcC	0.305881	0.403183	0.393426	133.627	173.791	27.77	28.5492	28.2535	28.1322	29.2969	28.1231	28.5098	27.9985	6	6	6	16.4	16.4	16.4	54.796	0	178.6	5587100000	64	98.6692	170.263	138.419	127.155	287.387	126.348	165.636	115.792	29.6033	78.7088	0.221538	0.452894	27.0345	27.8137	27.518	27.3967	28.5614	27.3876	27.7743	27.263	27.4574		6
P0A719;P0A718;P0A717	Ribose-phosphate pyrophosphokinase	prs	0.305799	1.07572	0.179353	3968.84	4986.86	32.4295	32.417	32.2843	32.3335	32.9963	32.545	32.3419	32.8042	16	16	16	53	53	53	34.218	0	323.31	301750000000	863	4145.36	4109.29	3744.73	3876	6164.96	4494.57	3898.86	5389.05	191.252	995.954	0.0481885	0.199716	32.3733	32.3608	32.2281	32.2773	32.9402	32.4888	32.2858	32.7481	32.3671	13.1941	104
P64274;P64273;P30128	Transcription elongation factor GreB	greB	0.305003	0.410306	0.38876	127.471	143.086	26.5542	26.7119	26.4389	25.7482	27.3605	26.1835	26.4751	26.654	6	6	6	32.9	32.9	32.9	18.545	0	10.729	1677000000	53	125.825	140.516	116.072		221.288	97.0672	119.049	134.939	12.3049	54.3978	0.0965311	0.380176	27.3817	27.5394	27.2665		28.1881	27.0111	27.3027	27.4816	27.3817	0	4
P0AEY7;P0AEY6;P0AEY5	NADPH:quinone oxidoreductase MdaB	mdaB	0.304885	0.626215	0.286782	668.176	857.619	29.0772	29.1878	29.3258	29.1089	30.0765	29.5171	29.0052	29.3205	14	14	14	77.7	77.7	77.7	21.891	0	323.31	24358000000	234	622.561	672.667	740.924	636.551	1253.25	847.091	591.947	738.19	52.8941	283.711	0.0791619	0.330813	29.6654	29.776	29.914	29.6972	30.6647	30.1053	29.5934	29.9088	29.8424	9.16491	32
P22939	Farnesyl diphosphate synthase	ispA	0.304827	0.956366	0.200687	457.402	576.424	29.2277	29.1794	29.0983	29.2568	29.8964	29.4801	29.1171	29.4878	9	9	8	34.8	34.8	34.1	32.159	0	201.16	18238000000	110	469.04	453.45	428.419	478.701	749.14	559.718	434.105	562.732	21.9446	129.81	0.0479766	0.225199	29.261	29.2127	29.1317	29.2902	29.9298	29.5135	29.1505	29.5211	29.2756	4.24793	19
P37188	PTS system galactitol-specific EIIB component	gatB	0.304541	0.500293	0.342026	7088.27	9010.08	31.725	31.3801	31.0309	31.5823	32.3921	31.6976	31.299	31.5478	5	5	5	92.6	92.6	92.6	10.222	0	323.31	47176000000	123	8577.73	6737.45	5275.97	7761.92	13683.6	8414.69	6365.5	7576.57	1423.59	3227.22	0.200838	0.358178	33.4119	33.067	32.7178	33.2692	34.079	33.3845	32.9859	33.2347	33.2519	14.8812	14
P67097;P67096;P67095	Phosphodiesterase YfcE	yfcE	0.304193	0.903876	0.207352	836.813	1038.25	29.7012	29.234	29.2901	29.2304	30.047	29.5917	29.5162	29.5175	5	5	5	57.1	57.1	57.1	20.122	0	141.84	16709000000	121	1049.29	756.508	786.853	754.604	1336.7	971.84	921.828	922.628	142.417	200.339	0.17019	0.192958	30.411	29.9438	29.9999	29.9402	30.7568	30.3015	30.2261	30.2273	30.2267	10.3553	19
P07026	Regulatory protein SdiA	sdiA	0.30347	1.14919	0.174082	71.4754	88.3316	26.4345	26.2921	26.0782	26.5412	26.808	26.6655	26.3667	26.7197	9	9	9	44.2	44.2	44.2	28.117	0	67.011	2880300000	79	76.0003	68.7865	59.2217	81.8931	98.7128	89.3394	72.4748	92.7994	9.77046	11.2573	0.136697	0.127444	26.6617	26.5192	26.3054	26.7683	27.0351	26.8926	26.5938	26.9469	26.715	6.80736	13
P64555;P64554	7-carboxy-7-deazaguanine synthase	queE	0.302983	1.43653	0.147037	540.013	670.356	29.1106	29.1066	28.8807	29.1555	29.6423	29.2887	29.2139	29.3205	12	12	12	64.6	64.6	64.6	25.029	0	178	22282000000	227	556.65	555.089	473.879	574.435	807.718	630.576	598.376	644.755	44.9544	93.6076	0.0832469	0.139639	29.5056	29.5016	29.2757	29.5505	30.0373	29.6837	29.6089	29.7155	29.5797	9.27612	33
A7ZRU6;B7LGZ9;P05852;B7NJS7;B7ND53;B7LZL4;C4ZQY1;B6I436;B5YRA4;B1XG69;B1IRQ2;A8A4M1;B7UIX2;A1AFY6;B1LF56;B7MB00;B7N068;Q0TD42;Q1R6R7;Q8FDG6;Q8XBK3	tRNA N6-adenosine threonylcarbamoyltransferase	tsaD	0.302957	1.36193	0.152294	468.706	584.278	29.4006	29.4668	29.2813	29.4039	29.9836	29.6958	29.6463	29.4387	13	13	13	47.8	47.8	47.8	36.007	0	153.49	21557000000	190	472.289	494.719	434.439	473.375	710.374	580.715	560.962	485.061	25.07	93.6316	0.0534877	0.160252	29.2709	29.3372	29.1516	29.2742	29.8539	29.5661	29.5166	29.309	29.3231	8.91886	24
A8A204;B1LKP0;B1X7N2;B6I8J3;B7LA09;B7M4Y8;B7NMA8;C4ZSM3;P0ABF6;B7NCH2;Q8FFV3;Q1R9T0;Q0TFU8;B7UFF9;B1IYC6;B7MXF5;B7MF55;A1AD04;A7ZNW5;B5YW75;Q8X648	Cytidine deaminase	cdd	0.30283	0.814676	0.227406	3756.36	4762.09	32.1523	32.1558	32.2159	32.1597	32.9445	32.5226	32.0556	32.3724	12	12	12	66	66	66	31.54	0	323.31	216210000000	485	3707.11	3716.13	3875.81	3726.39	6455.08	4804.19	3464.38	4324.69	80.0207	1257.43	0.0213027	0.264049	32.2137	32.2172	32.2773	32.2211	33.0059	32.584	32.117	32.4338	32.2492	11.7228	58
A7ZPF9;B7M6M3;Q8XCN9;Q8FFG3;P76503;B7NP25;B7N5V3;C4ZVN3;B6I6Q5;B5YXY5;B1X9L5;B1LME8;B1IXA4;A8A2L1;B7LBJ6;A1ADI9;B7MGV8;B7UFZ9;Q0TFA5;Q1R971;B7MY17	3-ketoacyl-CoA thiolase	fadI	0.302803	0.588037	0.302816	83.9952	105.177	27.6537	27.3018	27.1796	27.0034	27.9048	27.798	27.0118	27.635	6	6	6	22	22	22	46.558	0	42.339	2403400000	38	107.226	83.8114	76.9372	68.0064	127.839	118.629	68.4095	105.83	16.7844	26.1203	0.199826	0.248346	27.1533	26.8014	26.6791	26.5029	27.4044	27.2976	26.5114	27.1346	26.968	6.52356	2
P24192	Hydrogenase maturation factor HypD	hypD	0.302105	0.510919	0.339481	119.333	146.358	27.4613	27.9523	27.8883	27.0714	28.0241	27.8703	27.4217	28.2657	8	8	7	24.9	24.9	22	41.363	0	122.15	6427400000	84	105.609	148.932	142.41	80.3804	156.609	140.628	102.718	185.479	32.2196	34.5102	0.269998	0.235793	27.1316	27.6225	27.5586	26.7417	27.6943	27.5406	27.0919	27.936	27.5496		6
P77739;P58065	Probable ketoamine kinase YniA	yniA	0.301984	0.55243	0.318107	263.206	335.847	28.1216	28.5302	28.3933	28.5757	29.2693	28.819	28.1506	28.5898	9	9	9	49.3	49.3	49.3	32.458	0	115.74	8563700000	95	214.211	285.152	259.085	294.376	478.429	349.058	218.598	297.303	35.9196	109.144	0.13647	0.324982	28.1417	28.5502	28.4133	28.5957	29.2893	28.8391	28.1706	28.6098	28.573	8.19967	13
B1X931;C4ZVL3;P05459;B1IXM2;B7M6K1;Q8FFH2;Q1R992;Q0TFC6;B7MXZ7;B7MG84;B6I4U8;B1LLS6;A8A2I9;A1ADG9;B7NP01;B5YXW1;Q8XCR0;B7LBH4;B7UFX8;B7N5T2	Erythronate-4-phosphate dehydrogenase	pdxB	0.301899	1.05358	0.187248	9416.77	11805.3	33.7935	33.8638	33.9278	33.9115	34.5126	34.1551	33.8056	34.2309	24	24	8	61.1	61.1	21.4	41.367	0	323.31	191410000000	441	8894.04	9342.43	9770.58	9660.05	14714.4	11456.4	8969.45	12080.8	392.913	2359.57	0.0417248	0.199875	33.4636	33.5339	33.5979	33.5816	34.1827	33.8252	33.4757	33.901	33.5898	9.64566	51
P0A9I9;P0A9I8	Nitrite reductase (NADH) small subunit	nirD	0.301595	1.18505	0.171401	2004.54	2501.12	29.8504	30.0514	29.8697	29.8741	30.5501	30.1812	29.9429	30.1777	4	4	4	37	37	37	12.284	0	168.48	17270000000	102	1917.51	2207.37	1943.64	1949.65	3129.83	2417.27	2045.92	2411.45	135.934	453.707	0.0678131	0.181402	31.2722	31.4732	31.2915	31.2959	31.9719	31.603	31.3648	31.5995	31.419	4.85798	9
P55135;Q8FEG6;Q1R7Q7;Q0TE74;A1AEX2;Q8XED8	23S rRNA (uracil(1939)-C(5))-methyltransferase RlmD	rlmD	0.301236	1.22064	0.166207	92.1376	114.325	27.3654	27.6877	27.4256	27.4297	28.0319	27.6484	27.5533	27.8798	13	13	13	40.9	40.9	40.9	48.052	0	94.853	6074100000	102	84.8779	106.363	88.5281	88.7814	135.347	103.471	96.8107	121.67	9.6498	17.516	0.104733	0.153213	26.8194	27.1417	26.8796	26.8837	27.4859	27.1024	27.0073	27.3338	27.0548	2	15
P27830	dTDP-glucose 4,6-dehydratase 2	rffG	0.300714	0.64533	0.283658	433.649	553.28	29.5442	29.3996	29.3281	29.4052	30.148	30.0356	29.2665	29.4299	16	14	14	64.8	59.7	59.7	39.753	0	262.86	25136000000	186	472.563	427.066	406.216	428.752	721.183	666.646	389.057	436.235	27.8941	165.038	0.0643241	0.298289	29.2717	29.1271	29.0556	29.1328	29.8755	29.7632	28.994	29.1575	29.1451	7.15987	19
P21179	Catalase HPII	katE	0.300699	0.917631	0.207898	39.0534	48.84	27.2217	26.901	26.9949	27.1227	27.5374	27.0663	27.1475	27.6918	26	26	26	48.3	48.3	48.3	84.162	0	312.67	6211100000	159	43.5729	34.8112	37.1746	40.6549	54.353	39.0816	41.3687	60.5567	3.85212	10.3073	0.0986372	0.211042	25.8671	25.5465	25.6403	25.7681	26.1828	25.7117	25.793	26.3372	25.7805	9.57175	25
P39173	Putative glucose-6-phosphate 1-epimerase	yeaD	0.300551	0.827938	0.226446	980.377	1238.04	30.2342	30.3344	30.2765	30.3642	31.0341	30.7021	30.1823	30.493	20	20	20	81	81	81	32.666	0	323.31	71056000000	589	934.133	1001.99	962.226	1023.15	1635.39	1296.2	900.817	1119.73	39.8541	310.37	0.0406519	0.250696	30.245	30.3452	30.2873	30.375	31.0449	30.7129	30.1931	30.5038	30.3601	11.242	67
P0ADI8;P0ADI7	Uncharacterized isochorismatase family protein YecD	yecD	0.300193	0.842898	0.225534	318.341	399.432	28.2103	27.8893	27.9755	27.9893	28.7235	28.121	27.9871	28.4336	7	7	7	48.9	48.9	48.9	20.452	0	89.56	6279000000	72	363.433	290.262	308.335	311.333	520.552	341.408	310.839	424.927	31.4693	94.0491	0.0988542	0.235457	28.8967	28.5756	28.6619	28.6757	29.4099	28.8074	28.6734	29.12	28.7415	5.90689	8
B1IS49;B1XFI0;B7LEL6;B7MNC1;B7NH38;P39406;B7MTB6;Q8FA64;Q0T8U3;B7NVD9;Q8X510;B5Z4Q2;B6I2Q2;A8A899;A7ZVR0;B7LXT2;A1AJP2;Q1R2D5;B1LEH4	Ribosomal RNA small subunit methyltransferase C	rsmC	0.299613	0.675885	0.27524	858.295	1095.98	30.2379	30.3478	30.2942	30.3824	31.2317	30.5255	30.2799	30.4236	15	15	15	70.6	70.6	70.6	37.61	0	323.31	45137000000	288	812.254	877.271	844.917	898.738	1628.88	993.484	836.494	925.08	37.8349	361.03	0.0440815	0.329412	30.0453	30.1553	30.1016	30.1898	31.0392	30.333	30.0873	30.2311	30.1726	8.97154	44
P0AEP5;P0AEP4;P0AEP3	UTP--glucose-1-phosphate uridylyltransferase	galU	0.299359	0.842293	0.225728	3930.48	4940.61	32.367	32.1665	32.3906	32.2592	32.9848	32.5032	32.1781	32.7147	16	16	16	69.2	69.2	69.2	32.942	0	323.31	184750000000	532	4123.24	3583.14	4191.97	3823.57	6354.54	4535.7	3612.43	5259.77	281.43	1158.89	0.071602	0.234564	32.3657	32.1651	32.3893	32.2579	32.9834	32.5018	32.1768	32.7134	32.3775	11.258	72
P0AC82;P0AC81	Lactoylglutathione lyase	gloA	0.298768	0.69575	0.26765	1007.08	1250.39	29.2865	29.507	28.9732	29.0104	29.5476	29.6743	29.009	29.7412	6	6	6	37.8	37.8	37.8	14.92	0	17.259	11274000000	50	1061.72	1238.9	852.571	875.105	1274.68	1392.94	874.224	1459.71	180.756	262.187	0.179486	0.209684	30.4279	30.6483	30.1145	30.1518	30.689	30.8157	30.1503	30.8825	30.5381	10.9106	4
B7NSH2	S-ribosylhomocysteine lyase	luxS	0.298707	0.845088	0.225447	5159.98	6488.09	31.9039	31.8011	31.9479	32.0273	32.6325	32.3253	31.8317	32.0854	11	11	1	84.8	84.8	18.1	19.385	0	323.31	128550000000	431	5093.57	4740.01	5253	5553.33	8483.84	6841.94	4842.52	5784.06	338.707	1561.17	0.0656411	0.240621	32.6675	32.5648	32.7115	32.791	33.3962	33.089	32.5953	32.8491	32.7512		61
Q1RF63;Q0TKG9;P0A7H8;P0A7H7;P0A7H6;C4ZUS6;B7UKF2;B7NIF8;B7N925;B7MQI7;B7MDZ4;B7M3W4;B7L797;B6I0C4;B5Z3Y2;B1XFQ9;B1LJM9;B1IZC2;A7ZXD0;A7ZIN2;A1A8D8	Recombination protein RecR	recR	0.298467	0.675223	0.27666	473.997	594.854	28.4744	28.5222	28.8854	28.8409	29.4977	28.958	28.6363	28.8247	5	5	5	37.8	37.8	37.8	21.963	0	127.12	7082400000	81	406.853	420.72	542.544	525.871	832.912	570.831	455.709	519.962	70.0865	165.548	0.147863	0.278301	29.0579	29.1058	29.469	29.4244	30.0812	29.5416	29.2199	29.4082	29.4163	8.00563	6
P27127	Lipopolysaccharide 1,6-galactosyltransferase	rfaB	0.297967	0.897408	0.214016	88.5602	109.671	27.4224	27.282	27.0027	27.0113	27.8245	27.533	27.2237	27.3289	7	7	7	20.1	20.1	20.1	40.825	0	38.812	4679800000	73	104.138	94.3878	77.6244	78.091	138.001	112.527	90.6145	97.5427	12.9847	20.9842	0.146621	0.191337	27.1115	26.9711	26.6918	26.7004	27.5136	27.2222	26.9128	27.0181	26.9946		12
A7ZHM3;A7ZW82;B1IQK7;B1XCA8;B6HZA8;B7LGJ5;B7M174;C4ZRM6;P31663;B5YZH0;Q8X930;B7N803;Q8FL31;B7NI93;B7UII1;Q0TLJ9;Q1RG57;B7MNZ5;A1A7H9;B1LGT5;B7MBB6	Pantothenate synthetase	panC	0.297237	2.19431	0.116213	394.788	487.113	28.905	29.0003	29.031	28.8826	29.4367	29.2025	29.1535	29.215	21	21	21	75.6	75.6	75.6	31.597	0	323.31	30882000000	336	380.912	407.201	416.057	374.982	552.739	469.128	453.323	473.262	19.9271	44.5865	0.0504754	0.0915321	28.9638	29.0591	29.0898	28.9414	29.4956	29.2613	29.2124	29.2738	29.1511	10.4888	49
Q8XA83;Q1R8K0;P0AE02;P0AE01;A1AE69;Q0TEV3	tRNA (cytidine/uridine-2-O-)-methyltransferase TrmJ	trmJ	0.297197	1.0159	0.198605	2943.25	3659.09	31.3727	31.6785	31.6252	31.6786	32.269	31.6752	31.7603	31.8394	10	10	10	46.9	46.9	46.9	26.919	0	323.31	92804000000	213	2520.43	3122.3	3007.91	3122.38	4720.67	3114.96	3306.24	3494.49	286.999	724.481	0.0975109	0.197995	31.6627	31.9685	31.9152	31.9686	32.5589	31.9652	32.0503	32.1294	31.9685	8.72451	24
P0A9N6;P0A9N5;P0A9N4	Pyruvate formate-lyase 1-activating enzyme	pflA	0.296722	0.920325	0.21173	1051.82	1283.48	29.7543	30.3474	30.3399	30.2471	30.5786	30.6281	30.2651	30.4039	14	14	13	67.9	67.9	61.4	28.204	0	323.31	54338000000	294	774.321	1172.9	1166.74	1093.32	1378.96	1427.61	1107.18	1220.17	188.5	147.171	0.179213	0.114665	29.977	30.5701	30.5626	30.4698	30.8013	30.8508	30.4877	30.6265	30.5663	8.27146	36
P0ABQ0;P0ABQ1	Coenzyme A biosynthesis bifunctional protein CoaBC	coaBC	0.296472	0.878453	0.220169	446.93	561.126	29.6551	29.562	29.5507	29.5996	30.2648	29.9548	29.4466	29.887	16	16	16	54.4	54.4	54.4	43.438	0	323.31	39287000000	278	466.975	437.498	434.062	449.184	715.645	575.99	403.559	549.309	14.8486	127.885	0.0332235	0.227909	29.2547	29.1616	29.1503	29.1992	29.8645	29.5544	29.0463	29.4867	29.227	9.21917	36
P32680	Uncharacterized protein YjaG	yjaG	0.295836	0.598329	0.306295	1443.8	1854	30.3032	30.3089	30.3791	30.309	31.2999	30.5299	30.2628	30.3909	9	9	9	41.8	41.8	41.8	22.612	0	323.31	28906000000	181	1421.57	1427.21	1499.09	1427.32	2856.47	1666.06	1381.92	1511.55	36.9579	678.332	0.0255977	0.365875	30.8447	30.8504	30.9206	30.8505	31.8414	31.0714	30.8043	30.9324	30.8855	7.36632	20
A8A768;B1IVB8;B1XBC5;B7NFR0;B7NU40;B7UNT6;C5A0Q9;P11447;B7MI96;Q8FB96;Q1R3V1;Q0TAA0;B7MR51;A7ZUH8;B7M714;B7LA60;B6I5H6;A1AID8;B5Z062;Q8X730	Argininosuccinate lyase	argH	0.294492	1.01396	0.201614	92.994	115.787	27.5132	27.6355	27.439	27.651	28.2298	27.816	27.546	27.8249	11	11	11	35.9	35.9	35.9	50.318	0	221.17	7666900000	132	89.8494	97.8786	85.302	98.9459	148.387	111.069	91.9341	111.758	6.54064	23.5954	0.070334	0.203783	26.9007	27.023	26.8266	27.0385	27.6173	27.2036	26.9335	27.2124	27.0307	9.65821	16
Q1R996;P0A9Q6;P0A9Q5;B1X927;B1LLS1;B1IXM6;A8A2I5;A7ZPD1;A1ADG5;Q8FFH5;Q0TFD0	Acetyl-coenzyme A carboxylase carboxyl transferase subunit beta	accD	0.294379	1.65541	0.138517	1498.27	1842.89	30.9291	30.969	30.7651	31.0707	31.2733	31.1328	31.0947	31.4107	14	14	14	44.7	44.7	44.7	33.322	0	323.31	86583000000	493	1489.3	1531.48	1327.74	1644.56	1895.09	1717.57	1672.33	2086.58	131.229	188.775	0.0875874	0.102434	30.9112	30.9511	30.7472	31.0528	31.2554	31.1149	31.0768	31.3929	31.0648	11.7482	69
Q1R7R4;Q0TE80;P0A6Q1;P0A6Q0;P0A6P9;C4ZZT2;B7UHJ5;B7NV69;B7N715;B7MZ75;B7MLA0;B7LXJ5;B7LEJ8;B6I6H5;B5Z3E3;B1XDI9;B1LQB2;B1IU62;A8A3R4;A7ZQM2;A1AEW7	Enolase	eno	0.294212	1.63747	0.139017	14440.4	17842.7	34.5772	34.5823	34.7083	34.6403	35.133	34.7632	34.771	35.0177	25	25	24	78.7	78.7	78.7	45.654	0	323.31	2348000000000	4700	13935.5	13985.5	15275.6	14565.1	20565.9	15873.8	15960.7	18970.5	625.837	2317.04	0.0433392	0.129859	34.105	34.1101	34.2362	34.1681	34.6609	34.291	34.2988	34.5456	34.2636	15.289	518
A8A1C2;B7MWA6;Q8XBC7;Q1RAM1;P76316;P59329;C4ZQJ7;B7UST8;B7NBR4;B7MCH6;B7L8T2;B5YRU5;B1X677;B1LQT7;B1IZY5;B7M363;B7NRG1	D-cysteine desulfhydrase	dcyD	0.293832	1.1122	0.187002	213.429	263.78	28.3058	28.3908	28.1352	28.0741	28.6362	28.3707	28.285	28.7894	9	9	9	33.2	33.2	33.2	35.169	0	89.262	6174800000	79	224.727	238.496	199.425	191.069	283.206	235.163	221.478	315.273	22.0006	43.3483	0.103082	0.164335	28.2101	28.295	28.0395	27.9784	28.5404	28.2749	28.1893	28.6937	28.2425	9.79928	6
P31142;P58388	3-mercaptopyruvate sulfurtransferase	sseA	0.293283	0.766494	0.249378	912.803	1145.04	30.1408	30.0907	29.9885	30.2364	30.7901	30.418	29.9178	30.5035	13	13	13	63	63	63	30.811	0	323.31	48171000000	291	928.207	896.219	834.324	992.462	1462.46	1127.05	794.064	1196.58	65.8706	275.027	0.072163	0.24019	30.2359	30.1858	30.0836	30.3315	30.8852	30.5131	30.013	30.5987	30.2837	11.1066	33
P23842	Probable cyclic di-GMP phosphodiesterase PdeA	pdeA	0.292039	1.14798	0.182737	20.0488	24.7672	25.8955	26.1523	26.1739	26.1678	26.7205	26.3475	26.1915	26.298	15	15	13	28.4	28.4	22.9	83.523	0	81.111	2518400000	107	17.3501	20.7675	21.0838	20.9938	30.915	23.8096	21.3459	22.9982	1.80405	4.22484	0.089983	0.170582	24.5519	24.8087	24.8303	24.8242	25.3769	25.0039	24.8479	24.9544	24.8391	1.58496	9
P04951;C4ZQ44;B7M847;B7LE16;B6I8Z0;B1X8M2;B1IW13;A7ZYM0;A7ZK07;Q8XDG6;B7UN04;B5YT52;Q8FJA9	3-deoxy-manno-octulosonate cytidylyltransferase	kdsB	0.291831	0.967873	0.2082	1650.59	2053.58	30.9315	30.8313	30.7161	30.73	31.4806	31.0914	30.7739	31.0303	19	19	19	73	73	73	27.614	0	315.66	70104000000	304	1803.59	1681.41	1551.13	1566.23	2649.09	2017.22	1615.19	1932.81	117.429	433.101	0.0711435	0.210901	31.1847	31.0845	30.9693	30.9831	31.7338	31.3446	31.0271	31.2835	31.1346	9.83447	38
P0AF68;P0AF67	tRNA threonylcarbamoyladenosine biosynthesis protein TsaE	tsaE	0.291313	0.87276	0.226506	630.872	778.687	28.9979	28.6348	28.5609	28.6395	29.3531	28.9123	28.6994	29.0336	5	5	5	52.3	52.3	52.3	16.853	0	165.16	10389000000	91	767.004	594.843	564.84	596.803	983.587	722.376	622.356	786.428	91.9259	152.375	0.145712	0.195682	29.9635	29.6004	29.5265	29.6051	30.3187	29.8778	29.665	29.9992	29.7714	9.85487	7
P67431;P67430	HTH-type transcriptional repressor NemR	nemR	0.291253	0.556971	0.3288	83.5032	94.171	25.6293	26.3892	26.2004	26.0934	26.8162	25.9814	26.1848	26.495	5	5	5	28.1	28.1	28.1	22.275	0	31.152	1511500000	39		93.1581	81.6195	75.732	125.615	70.0183	80.7351	100.316	8.86443	24.4291	0.106157	0.259412		26.9524	26.7635	26.6566	27.3793	26.5446	26.748	27.0581	26.7635	4.45943	2
Q8CW16;P69854;P69853	Tat proofreading chaperone DmsD	dmsD	0.291198	0.387211	0.414785	240.772	315.611	27.8362	27.9477	27.9249	27.5167	28.8698	28.3454	27.5649	27.6101	9	9	9	44.6	44.6	44.6	23.397	0	323.31	6884300000	125	244.139	263.958	259.787	195.204	503.409	348.733	201.9	208.403	31.5536	142.348	0.131052	0.451023	28.3284	28.4399	28.4172	28.0089	29.362	28.8377	28.0571	28.1024	28.3728	7.34873	16
A1ADX7;B7M7H2;Q8FF82;Q1R8Q6;P0AED7;C4ZX46;B7MHW4;B7UGM1;B7LCK7;B1XAE3;B1LNC1;B1IWI8;A8A2W3;A7ZPR5;B5Z008;B6I539;Q8XBE0;Q0TF05;B7NQK9;B7N653	Succinyl-diaminopimelate desuccinylase	dapE	0.290759	0.930047	0.214442	225.208	280.039	28.6797	28.4413	28.576	28.4477	29.2345	28.7867	28.5214	28.7651	17	17	17	61.6	61.6	61.6	41.269	0	122.68	15127000000	200	248.418	210.232	231.011	211.169	366.338	267.747	222.353	263.719	18.2004	61.0808	0.0808161	0.218115	28.3533	28.1149	28.2495	28.1212	28.9081	28.4603	28.1949	28.4386	28.3014	7.26679	14
P00805	L-asparaginase 2	ansB	0.290699	1.32849	0.166084	2144.94	2643.45	31.4778	31.7304	31.6384	31.5208	32.1787	31.8464	31.774	31.7312	23	23	22	80.5	80.5	79.6	36.85	0	323.31	180480000000	661	1975.55	2357.69	2210.63	2035.89	3226.93	2557.1	2430.76	2359.03	173.363	397.509	0.0808239	0.150375	31.3148	31.5673	31.4753	31.3577	32.0156	31.6833	31.6109	31.5681	31.5677	6	88
P25889;Q8X643	NAD-dependent dihydropyrimidine dehydrogenase subunit PreA	preA	0.289864	0.653002	0.291694	137.096	164.001	27.5995	28.4608	27.6792	27.9242	28.3982	28.2629	28.18	27.9822	9	9	9	25.3	25.3	25.3	45.068	0	53.307	5315600000	82	106.684	194.983	112.805	133.914	186.622	169.748	160.174	139.46	40.3153	19.6776	0.294065	0.119984	27.146	28.0073	27.2257	27.4707	27.9447	27.8094	27.7265	27.5287	27.6276		6
P27296;Q8FJN1;Q8X7X9	ATP-dependent DNA helicase DinG	dinG	0.28966	0.887575	0.225377	14.3066	17.4666	25.9027	25.5075	25.2979	25.5587	26.1289	25.7021	25.6695	25.9249	12	12	12	21.9	21.9	21.9	81.439	0	42.663	1465000000	40	17.8882	13.5647	11.7132	14.0603	20.9589	15.5446	15.1943	18.1688	2.59258	2.67996	0.181216	0.153433	24.5955	24.2004	23.9908	24.2516	24.8218	24.395	24.3624	24.6178	24.3787		6
P42620	Glutathionyl-hydroquinone reductase YqjG	yqjG	0.288157	1.49539	0.155251	57.7815	70.6548	26.2968	26.3462	26.526	26.623	26.9328	26.6861	26.722	26.6037	14	14	13	55.5	55.5	48.8	37.386	0	136.62	3320200000	91	51.7555	53.575	60.7627	65.0327	80.7877	67.9698	69.6994	64.1621	6.20418	7.14032	0.107373	0.101059	26.1129	26.1623	26.3421	26.4391	26.7489	26.5022	26.538	26.4198	26.4294	6.87036	10
P76506	Intermembrane phospholipid transport system lipoprotein MlaA	mlaA	0.287734	0.816672	0.2453	872.35	1085.64	30.0599	29.9045	29.9289	29.7552	30.6278	30.1879	29.828	30.1558	12	12	12	53.4	53.4	53.4	28.041	0	323.31	36266000000	231	964.702	865.248	880.119	779.33	1435.65	1055.11	820.117	1031.68	75.9217	256.157	0.0870313	0.235951	30.291	30.1356	30.1599	29.9862	30.8588	30.4189	30.0591	30.3869	30.2255	9.48583	25
A7ZJK6;B7M768;B6I7V1;B7LC78;Q8X7Y9;B7ULZ2;B7NNM5;B5YS86;B7NA95;B1LM86;B1IXH3;A7ZY51;A1A936;B7MGQ3;B7MQP9;Q8FJN6;Q0TJQ3;Q1RED2	UPF0194 membrane protein YbhG	ybhG	0.287668	1.20482	0.181305	137.912	169.386	27.7449	27.4488	27.7695	27.6287	28.2323	27.8168	27.9102	27.7833	15	15	0	61.3	61.3	0	36.284	0	323.31	7075900000	110	147.03	119.497	149.585	135.538	206.832	154.617	165.065	151.031	13.7129	25.6638	0.0994318	0.151511	27.6042	27.308	27.6288	27.4879	28.0916	27.676	27.7694	27.6425	27.6356		16
P0A9R9;P0A9R8;P0A9R7	Cell division ATP-binding protein FtsE	ftsE	0.287644	0.971204	0.212038	411.247	510.456	28.6292	28.7719	28.61	28.555	29.359	28.8403	28.7562	28.7613	14	14	14	80.2	80.2	80.2	24.439	0	323.31	24553000000	259	407.058	449.842	401.631	386.457	678.522	471.886	444.905	446.512	27.1669	112.723	0.0660597	0.220829	29.0586	29.2013	29.0394	28.9844	29.7884	29.2697	29.1856	29.1907	29.1882	8.36632	31
B1ITA2;B1XEI7;B5YQ93;B7N7E4;C5A0H2;P67603;P67604;Q0TDV1;Q8FE69;Q1R7D0;B7NHW2;B7MZJ8;B7MM87;A1AF90;A7ZR09;A8A441;B6I733;B7LF85;B7LYG4;B1LDA1;B7UHU9	N(4)-acetylcytidine amidohydrolase	yqfB	0.287624	1.15728	0.187589	1685.89	2085.04	29.6634	29.6841	29.5593	29.5742	30.2167	29.8089	29.6224	29.9835	9	9	8	64.1	64.1	64.1	11.905	0	323.31	38414000000	184	1736.37	1761.74	1614.26	1631.2	2557.94	1922.5	1687.26	2172.48	73.9908	372.349	0.0438882	0.178581	31.1304	31.1512	31.0263	31.0412	31.6838	31.2759	31.0895	31.4505	31.1408	10.0634	28
P0AC77;P0AC76;P0AC75	3-deoxy-D-manno-octulosonic acid transferase	waaA	0.286808	0.8748	0.23159	79.3228	96.9869	27.19	27.2855	26.9413	27.5084	27.8504	27.4263	27.3124	27.4833	16	16	14	51.1	51.1	46.4	47.29	0	161.09	9071100000	190	76.2882	81.5646	64.0988	95.3396	121.137	90.0144	83.116	93.68	12.9427	16.6852	0.163165	0.172036	26.667	26.7626	26.4184	26.9855	27.3275	26.9034	26.7895	26.9604	26.8464	5.75489	24
A8A765;B1IVC1;B1XBC2;B7LA57;C5A0C3;P23908;B6I5H3;Q8X742;B7NFQ7;B7M711;B5Z059;A7ZUH5;Q0TAA3;B1LNR7;B7MI93;B7MR48;B7NU43;B7UNT3;Q8FB97	Acetylornithine deacetylase	argE	0.285429	0.290051	0.496887	213.896	289.699	28.6278	28.4373	28.3513	28.5811	29.5696	28.8231	27.6604	29.0862	9	9	9	31.9	31.9	31.9	42.359	0	176.27	8059300000	96	233.318	204.183	192.26	225.825	451.144	267.508	118.52	321.622	18.9912	137.693	0.0887868	0.475298	28.2637	28.0732	27.9872	28.2171	29.2055	28.459	27.2963	28.7221	28.2404	8.34873	13
Q8XA15;B5YZ87;A7ZW01;B1IRC7;B1XC50;B6HZ30;B7L4H2;B7M0E6;C4ZPX5;A7ZHE2;P05637;B7NHF5;B1LFY5;B7UI97;B7MNQ8;Q0TLT8;Q8FL98;Q1RGE8;B7MAH4;A1A798;B7N7S4	Bis(5-nucleosyl)-tetraphosphatase, symmetrical	apaH	0.285234	0.821752	0.248692	118.128	146.751	27.3172	27.1431	27.1436	27.2994	27.7356	27.7024	27.0209	27.5852	9	9	9	47.5	47.5	47.5	31.497	0	111.75	4832100000	94	125.722	111.294	111.332	124.165	168.513	164.645	102.173	151.674	7.89523	30.579	0.0668361	0.208373	27.3805	27.2065	27.2069	27.3627	27.799	27.7658	27.0843	27.6486	27.3716	6.52356	13
P77279	Probable iron export ATP-binding protein FetA	fetA	0.285184	1.03953	0.203257	278.866	339.927	28.1572	28.3664	28.1522	27.8525	28.4793	28.443	28.1505	28.5963	11	11	11	64	64	64	25.382	0	88.606	8776900000	124	281.526	325.943	280.556	227.439	352.746	343.891	280.214	382.856	40.2944	43.1608	0.144494	0.126971	28.5319	28.7412	28.527	28.2272	28.8541	28.8178	28.5253	28.9711	28.6366	7.33985	11
P39315	Quinone oxidoreductase 2	qorB	0.284759	0.498382	0.362096	155.979	199.447	27.6308	27.4654	27.6013	27.4623	28.4421	27.8569	27.1823	27.8175	10	10	10	62.6	62.6	62.6	29.733	0	277.55	7078600000	74	165.985	147.827	162.589	147.513	292.92	194.453	121.254	189.162	9.6942	70.6685	0.0621509	0.354322	27.7774	27.6119	27.7478	27.6089	28.5886	28.0034	27.3289	27.964	27.7626	7.03342	6
P59588;P07000	Lysophospholipase L2	pldB	0.283557	0.538146	0.343451	35.9463	45.4782	25.6139	25.952	25.9486	25.8047	26.7532	26.0932	25.6666	25.9406	9	9	9	30.9	30.9	30.9	38.978	0	24.508	1682900000	52	30.7622	38.9791	38.8851	35.1588	68.3004	43.0266	31.918	38.6679	3.88716	15.8863	0.108138	0.349316	25.3698	25.708	25.7045	25.5606	26.5091	25.8491	25.4225	25.6965	25.7005		6
P77265	Multidrug resistance-like ATP-binding protein MdlA	mdlA	0.282432	0.442014	0.388705	24.0302	22.2083	25.971	26.07	24.8878	25.5387	25.6121	25.9932	26.0323	25.9595	9	9	9	17.8	17.8	17.8	66.017	0	24.589	1088500000	37	23.1984	24.8621			18.0439	23.5618	24.2154	23.0121	1.17637	2.8195	0.0489537	0.126957	24.9668	25.0657			24.6079	24.989	25.0281	24.9553	24.9779		4
P03018	DNA helicase II	uvrD	0.281732	1.91994	0.136694	145.225	177.467	28.9581	28.9551	28.8513	28.8448	29.385	29.1924	29.054	29.1049	22	21	21	39.9	39	39	81.989	0	323.31	29956000000	302	150.898	150.585	140.027	139.39	203.464	177.795	161.376	167.233	6.37658	18.6152	0.0439083	0.104894	27.6412	27.6383	27.5345	27.528	28.0681	27.8755	27.7371	27.7881	27.6892	6.89482	37
P37342	Uncharacterized protein YjjI	yjjI	0.280921	0.943636	0.224894	280.557	338.406	28.9767	29.6011	29.2766	29.4517	29.6655	29.5855	29.7574	29.4215	21	21	20	61	61	61	58.019	0	323.31	35975000000	270	216.793	335.654	267.453	302.33	351.137	332.007	374.484	295.996	50.8176	33.1823	0.181131	0.0980545	28.1588	28.7831	28.4587	28.6338	28.8475	28.7675	28.9395	28.6035	28.7007		24
A1AG09;B7N095;Q0TD14;P0A8G4;P0A8G3;C4ZR08;B7NJV5;B7UIZ9;B7MB25;B1XG96;B1LFJ0;B1IRM5;A8A4Q0;A7ZRX6;B5YRY4;Q8XAI7;B7ND80;B7LZZ6;B6I464;B7LH20	Uronate isomerase	uxaC	0.280138	0.739592	0.277717	227.303	282.158	28.8442	29.1221	28.853	28.9244	29.6953	29.0642	28.8829	29.2217	27	27	27	70.4	70.4	70.4	53.987	0	323.31	32173000000	316	212.499	258.14	213.804	224.768	385.608	247.892	218.339	276.792	21.2818	72.9788	0.0936274	0.258645	28.1302	28.4081	28.1389	28.2104	28.9813	28.3502	28.1689	28.5077	28.2803	8.47167	32
P45524	Putative esterase YheT	yheT	0.278825	0.825426	0.251249	58.934	73.0767	26.6087	26.4726	26.551	26.4606	27.2562	26.6983	26.471	26.7827	12	12	11	44.1	44.1	41.8	38.495	0	50.582	2930500000	79	62.5108	56.8319	60.0366	56.3565	98.3685	66.5603	56.7667	70.6115	2.8909	17.8347	0.0490532	0.244054	26.3826	26.2465	26.3249	26.2345	27.0301	26.4722	26.2449	26.5566	26.3537	5.24793	8
P0AD13;P0AD12	Protein YeeZ	yeeZ	0.278533	0.58328	0.33118	895.39	1108.56	30.2743	29.7271	30.0923	29.994	30.8023	30.2087	29.8672	30.3236	9	9	9	50.4	50.4	50.4	29.68	0	323.31	24624000000	132	1058.41	721.542	931.788	869.815	1531.82	1010.92	795.94	1095.55	139.974	309.075	0.156328	0.278809	30.4234	29.8762	30.2414	30.1431	30.9514	30.3578	30.0163	30.4727	30.2996	7.94837	21
Q8FGR3;Q1RAS4;Q0TGX2;P0A813;P0A812;C4ZQE4;B7USN7;B7NS58;B7NBL1;B7MVZ1;B7MBR9;B7M2F1;B7L7R3;B6IBT9;B5YR05;B1XHC8;B1LD11;B1J0M8;A8A160;A7ZMY4;A1AC21	Holliday junction branch migration complex subunit RuvB	ruvB	0.278196	0.809181	0.255848	112.826	139.885	27.4631	27.4012	27.3819	27.3579	28.0034	27.8941	27.2533	27.5662	11	11	11	41.4	41.4	41.4	37.171	0	126.96	7531600000	164	117.794	112.798	111.282	109.431	171.948	159.281	101.703	126.608	3.58687	31.8245	0.0317912	0.227505	27.2875	27.2256	27.2063	27.1823	27.8278	27.7185	27.0777	27.3906	27.2566	8.43463	15
P30863;Q8X7Z7	2,5-diketo-D-gluconic acid reductase B	dkgB	0.278084	0.600716	0.324616	180.82	225.514	27.5948	27.6024	27.896	27.8356	28.5094	27.9138	27.5246	28.0934	11	11	11	51.3	51.3	51.3	29.436	0	137.03	6411500000	95	163.504	164.377	201.88	193.521	310.186	204.41	155.66	231.8	19.7911	64.6371	0.109452	0.286621	27.7558	27.7634	28.057	27.9966	28.6704	28.0748	27.6856	28.2544	28.0268	6.90689	13
P0A9T4	Protein tas	tas	0.277842	0.719204	0.285375	155.366	193.659	27.9757	27.838	27.9342	27.885	28.6967	28.1197	27.803	28.1248	11	11	11	37.3	37.3	37.3	38.499	0	140.14	11120000000	160	162.781	147.819	158.109	152.755	269.666	180.044	144.241	180.687	6.48808	53.4569	0.0417599	0.276036	27.7495	27.6118	27.7079	27.6587	28.4705	27.8935	27.5768	27.8986	27.7287	7.91289	19
P0A8Z5;P0A8Z4;P0A8Z3	Acyl-CoA thioester hydrolase YbgC	ybgC	0.277669	0.517504	0.360356	247.943	299.905	26.7257	27.5201	27.1869	27.5087	27.9688	27.4199	27.2061	27.4573	5	5	5	34.3	34.3	34.3	15.562	0	73.95	3707000000	44	169.382	295.408	233.931	293.052	404.431	275.387	237.102	282.699	59.5986	72.496	0.240372	0.24173	27.8063	28.6007	28.2674	28.5893	29.0494	28.5005	28.2867	28.5379	28.5192	7.91886	4
P19323	Formate hydrogenlyase transcriptional activator FhlA	fhlA	0.276541	0.669732	0.302634	17.5016	20.8875	25.5838	26.1297	25.9944	25.4183	26.0484	25.8441	26.3523	25.9875	10	10	8	18.4	18.4	15.5	78.467	0	25.184	993270000	38		21.7723		13.231	20.5683	17.8262	25.4453	19.7101	6.03956	3.24723	0.345085	0.155463		24.8762		24.1648	24.7949	24.5906	25.0988	24.734	24.7645		3
P0AB30;P0AB29;P0AB28	Large ribosomal RNA subunit accumulation protein YceD	yceD	0.276143	0.5627	0.341749	1249.68	1566.64	29.9256	29.7241	30.0495	29.8485	30.7204	30.2983	29.8712	29.7623	8	8	8	41	41	41	19.315	0	130.17	27773000000	122	1279.64	1111.2	1395.54	1212.33	2232.25	1661.16	1231.82	1141.33	119.366	498.319	0.0955177	0.318082	30.6945	30.4929	30.8183	30.6173	31.4892	31.0672	30.6401	30.5311	30.6673	11.1472	13
P0AG29;P0AG28;P0AG27	Uncharacterized protein YibN	yibN	0.275904	0.427987	0.403113	4159.05	5257.94	31.1503	31.5069	30.9994	31.4811	32.2913	31.5441	31.2735	31.1323	7	7	7	59.4	59.4	59.4	15.596	0	323.31	83911000000	215	3743.49	4805.24	3368.28	4719.18	8321.94	4932	4080.96	3696.84	713.981	2106.86	0.171669	0.400701	32.2277	32.5843	32.0768	32.5585	33.3687	32.6215	32.3509	32.2098	32.4547	11.7615	28
P16528	Transcriptional repressor IclR	iclR	0.275284	1.10691	0.206196	166.415	203.201	27.4437	27.6956	27.6699	27.7138	28.227	27.74	27.906	27.7513	11	11	11	47.8	47.8	47.8	29.739	0	97.336	7618200000	111	145.574	173.647	170.557	175.882	251.913	179.127	201.208	180.556	14.0646	34.0055	0.0845151	0.167349	27.59	27.8418	27.8162	27.8601	28.3732	27.8862	28.0522	27.8975	27.8731	3.80735	12
P76008;Q8XDJ8;P59238	Murein tetrapeptide carboxypeptidase	ldcA	0.275269	0.855305	0.250434	193.232	236.499	27.9234	28.1342	27.8373	28.1695	28.4544	28.212	27.9339	28.5651	10	10	10	44.1	44.1	44.1	33.567	0	89.719	9667100000	140	180.225	208.897	169.681	214.126	261.385	220.589	181.563	282.462	21.647	44.7325	0.112026	0.189144	27.8949	28.1058	27.8088	28.1411	28.4259	28.1836	27.9055	28.5367	28.1234	6.78136	19
Q8XA10;Q8FL93;P0AA37	Dual-specificity RNA pseudouridine synthase RluA	rluA	0.27509	0.427769	0.403506	149.155	187.909	27.4738	27.2301	27.2045	26.9171	28.0375	27.4808	26.7777	27.6299	6	6	6	37.9	37.9	37.9	24.86	0	57.347	3711700000	49	178.177	150.228	147.559	120.658	264.398	179.046	109.44	198.754	23.5091	63.7813	0.157615	0.339426	27.8786	27.6349	27.6093	27.3218	28.4423	27.8855	27.1824	28.0347	27.7567	8.59246	4
Q1RF97;Q0TKK3;P0A6H3;P0A6H2;P0A6H1;C4ZTJ5;B7UJR1;B7NJ56;B7N8Z2;B7MQF4;B7MD97;B7M3T1;B7L675;B6HZP5;B5Z3U5;B1XFM6;B1LJJ5;B1J010;A7ZX96;A7ZIJ6;A1A8A7	ATP-dependent Clp protease ATP-binding subunit ClpX	clpX	0.274536	2.25683	0.131575	1271.14	1542.58	31.1169	31.2525	31.2208	31.1212	31.5617	31.5107	31.3097	31.4274	25	25	24	73.8	73.8	73.8	46.355	0	323.31	172400000000	694	1216.99	1338.19	1308.76	1220.63	1661.64	1603.35	1392.83	1512.5	61.6304	117.186	0.0484842	0.0759678	30.6228	30.7584	30.7266	30.6271	31.0676	31.0166	30.8156	30.9333	30.787	12.4236	74
Q8X580;Q8FC86;Q0TBG8;P0C093;C4ZXN3;B7UM47;B7NQ02;B7NEU5;B7N282;B7MFK2;B7M4C6;B7L761;B6I3L8;B5YWD9;B1X975;B1LK78;B1IYV9;A8A6A3;A7ZTJ2;A1AHH2	Nucleoid occlusion factor SlmA	slmA	0.273519	0.714986	0.29138	497.353	614.048	28.9253	28.8473	28.6401	28.8419	29.4515	29.0801	28.6118	29.2052	9	9	9	41.4	41.4	41.4	22.836	0	132.49	13066000000	141	536.346	507.862	439.284	505.917	775.297	597.778	430.66	652.456	41.1349	143.03	0.0827078	0.232929	29.4525	29.3746	29.1674	29.3691	29.9788	29.6074	29.1391	29.7324	29.4136	7.86419	20
P39160	D-mannonate oxidoreductase	uxuB	0.273495	0.555631	0.346488	121.864	152.519	28.1601	28.0724	27.8772	28.0323	28.7652	28.0818	27.8048	28.5842	16	16	15	39.5	39.5	37.2	53.58	0	126.07	13860000000	205	132.63	124.74	108.801	121.285	202.598	125.561	103.425	178.49	9.91898	45.8959	0.0813939	0.30092	27.4569	27.3694	27.1741	27.3292	28.062	27.3787	27.1017	27.8811	27.374	7.50779	22
Q0TAC6;P0A8U8;P0A8U7;P0A8U6;C5A0A5;B7UNQ8;B7M6Z3;B7LA39;B6I4T6;B5Z040;B1XBA4;B1LNP3;B1IVD9;A8A746;A7ZUF7	Met repressor	metJ	0.273446	0.724188	0.290037	2670.64	3214.51	29.8416	30.4554	30.4417	30.4018	30.5159	30.8451	30.5607	30.3127	8	8	8	79	79	79	12.141	0	164.87	27280000000	102	1928.44	2963.86	2935.59	2854.67	3091.99	3893.43	3190.67	2681.95	496.956	503.364	0.186081	0.156591	31.2803	31.8941	31.8804	31.8405	31.9546	32.2838	31.9994	31.7514	31.8873	10.255	12
Q1R5V0;Q0TA80;P0A7J5;P0A7J4;P0A7J3;C5A0S5;B7UPE0;B7NRR3;B7NFS5;B7MR71;B7MIX1;B7M732;B7LA78;B6I5J5;B5Z081;B1XBY7;B1LNT7;B1IUR2;A8A784;A7ZUJ8;A1AIF7	Large ribosomal subunit protein uL10	rplJ	0.273427	2.61099	0.12058	42884.1	51984.7	34.8606	34.7812	34.8675	34.7534	35.2014	35.0056	35.0195	35.1299	15	15	15	80	80	80	17.711	0	323.31	994020000000	836	44227.6	41836.6	44441.2	41031.1	56147.5	48953.2	49431.9	53406.3	1708.86	3418.39	0.0398484	0.0657575	35.7545	35.6752	35.7614	35.6474	36.0954	35.8995	35.9134	36.0239	35.8305	16.4134	118
P75957;Q8FIM7;Q1RD37;Q0TIV6;Q8X8E3	Lipoprotein-releasing system ATP-binding protein LolD	lolD	0.273302	1.4122	0.176773	439.509	535.802	28.8632	28.7918	28.7265	28.8013	29.2999	29.1581	28.8494	28.9687	9	9	9	60.1	60.1	60.1	25.438	0	323.31	13542000000	145	460.505	438.068	418.476	440.988	625.217	566.099	456.083	495.811	17.1995	74.9828	0.0391334	0.139945	29.2348	29.1635	29.0981	29.173	29.6715	29.5297	29.221	29.3403	29.2279	9.51373	18
P0A928;P0A927	Nucleoside-specific channel-forming protein Tsx	tsx	0.272388	0.749925	0.283975	6720.48	8286.5	33.2353	33.0297	33.0839	33.0113	33.647	33.2773	32.914	33.6115	13	13	13	58.2	58.2	58.2	33.589	0	323.31	335980000000	961	7425.8	6430	6678.46	6347.65	9906.35	7646.87	5929.7	9663.09	490.788	1869.27	0.0730287	0.22558	33.206	33.0003	33.0545	32.9819	33.6176	33.2478	32.8846	33.5821	33.1302	13.174	140
P37661	Kdo(2)-lipid A phosphoethanolamine 7-transferase	eptB	0.272039	1.95583	0.145932	57.2903	69.3006	27.1744	27.1528	27.1425	27.3702	27.6185	27.4119	27.3889	27.5087	11	11	9	25	25	21	63.804	0	198.07	4762600000	70	55.7587	54.9218	54.5279	63.9527	76.095	65.8483	64.7941	70.4648	4.47116	5.15579	0.0780439	0.0743975	26.2193	26.1977	26.1874	26.4151	26.6634	26.4569	26.4338	26.5536	26.4245	1.58496	8
P24178	Protein YffB	yffB	0.271946	0.708223	0.295852	979.848	1203.03	29.2289	28.8187	29.0232	29.0527	29.6657	29.2497	28.8726	29.4234	5	5	5	47.5	47.5	47.5	13.6	0	265.5	12407000000	112	1119.8	840.222	969.597	989.777	1520.31	1136.19	872.511	1283.12	114.433	271.288	0.116786	0.225503	30.5039	30.0937	30.2982	30.3276	30.9407	30.5247	30.1475	30.6984	30.4158	7.15987	14
P0A8Y6;P0A8Y5	Sugar phosphatase YidA	yidA	0.271544	0.895669	0.248951	850.276	1039.51	29.8702	30.0479	30.0901	29.8286	30.5334	30.2626	29.8586	30.2683	12	12	12	50.4	50.4	50.4	29.721	0	288.87	54151000000	363	796.469	902.004	929.013	773.617	1267.19	1048.31	790.043	1052.5	76.6967	195.206	0.0902022	0.187787	30.0173	30.195	30.2372	29.9757	30.6805	30.4097	30.0057	30.4154	30.2161	9.33092	44
P0AF19;P0AF18	N-acetylglucosamine-6-phosphate deacetylase	nagA	0.271537	0.688741	0.302296	421.948	522.803	29.298	29.515	29.372	29.504	30.2211	29.6031	29.3694	29.5815	13	13	13	44.2	44.2	44.2	40.949	0	220.1	21820000000	204	386.021	449.335	406.543	445.894	736.703	477.951	405.809	470.747	30.8302	146.244	0.0730662	0.279732	28.9828	29.1997	29.0568	29.1887	29.9059	29.2879	29.0542	29.2662	29.1942	9.55459	23
P0ADP0	5-amino-6-(5-phospho-D-ribitylamino)uracil phosphatase YigB	yigB	0.269593	0.774671	0.280565	233.412	287.164	28.0166	27.8777	27.9462	28.0912	28.5322	27.9349	27.9978	28.5452	12	12	12	63.9	63.9	63.9	27.122	0	115.21	11824000000	154	238.609	216.5	227.135	251.403	342.337	225.343	235.494	345.482	15.0124	65.6673	0.0643171	0.228675	28.2957	28.1568	28.2253	28.3703	28.8113	28.214	28.2769	28.8243	28.2863	7.96	13
P42632	PFL-like enzyme TdcE	tdcE	0.269239	0.736107	0.291358	681.017	810.646	30.7877	31.5546	31.0535	31.2086	31.622	31.3829	31.4431	31.2335	46	41	40	72.3	67.8	67.8	85.935	0	323.31	143260000000	849	518.069	886.322	624.04	695.638	929.104	785.906	819.733	707.842	155.094	91.8255	0.227738	0.113274	29.403	30.17	29.6688	29.824	30.2373	29.9982	30.0584	29.8488	29.9235	2.58496	94
A1AH96;B7NEK6;Q8FCF1;Q1R543;Q0TBP9;P58220;P37666;C4ZXE2;B7ULB4;B7NP49;B7N1K7;B7MER0;B7M3H6;B7L6W9;B6I3C3;B5YVK6;B1X8G8;A7ZTA0;B1IZP1;A8A609;B1LJB3	Glyoxylate/hydroxypyruvate reductase B	ghrB	0.268869	0.697904	0.303092	1038.46	1283.46	30.5544	30.4001	30.4833	30.5612	31.1774	30.9642	30.3809	30.552	13	13	13	50	50	50	35.396	0	304.61	53976000000	215	1077.89	967.475	1025.49	1082.99	1667.18	1436.08	954.576	1076.02	53.9896	327.477	0.05199	0.255151	30.4494	30.2951	30.3783	30.4562	31.0724	30.8592	30.2759	30.447	30.4482	10.332	28
P0AGF3;P0AGF2	Sulfur acceptor protein CsdE	csdE	0.267749	0.498317	0.377736	250.557	311.447	27.4293	27.0542	27.4543	27.3062	28.0498	27.6738	26.955	27.6364	8	8	8	74.8	74.8	74.8	15.94	0	109.38	4781100000	86	270.574	208.08	275.354	248.218	417.794	321.094	194.119	312.779	30.6886	91.5974	0.122482	0.294103	28.4753	28.1002	28.5003	28.3521	29.0958	28.7198	28.001	28.6823	28.4878	7.79442	5
P0A9E7;P0A9E6;P0A9E5	Fumarate and nitrate reduction regulatory protein	fnr	0.267663	0.831816	0.268077	1842.71	2242.67	31.2068	30.9487	30.8105	30.9259	31.6071	31.0561	31.0048	31.2944	7	7	7	30	30	30	27.967	0	323.31	48894000000	226	2159.15	1802.2	1635.92	1773.57	2857.53	1942.97	1874.42	2295.76	223.099	449.555	0.121071	0.200455	31.4417	31.1836	31.0453	31.1607	31.842	31.291	31.2397	31.5293	31.2654	10.1046	37
A7ZUK0;Q1R5V1;Q0TA79;P0A7K4;P0A7K3;P0A7K2;C5A0S6;B7UPE1;B7NRR4;B7NFS6;B7MIX2;B7M733;B7LA79;B6I5J6;B5Z082;B1XBY8;B1LNT8;B1IUR1;A8A785;B7MRB2	Large ribosomal subunit protein bL12	rplL	0.267563	1.21116	0.202961	79341.8	96002	35.1884	34.9801	35.3151	35.1715	35.7093	35.3655	35.2965	35.354	10	10	10	61.2	61.2	61.2	12.295	0	323.31	1169600000000	5126	80443.1	69528	87902.1	79494	115848	91060.6	86766.6	90332.8	7545.96	13363	0.095107	0.139195	36.6089	36.4007	36.7356	36.592	37.1299	36.786	36.717	36.7745	36.7263	17.1518	640
P77775	Epimerase family protein YfcH	yfcH	0.266983	0.906179	0.249673	127.69	155.323	27.4233	27.5673	27.3408	27.2196	28.0165	27.5452	27.408	27.6492	9	9	9	35	35	35	32.698	0	39.793	5540500000	86	130.393	144.231	123.077	113.061	197.53	142.011	129.01	152.739	13.1171	29.7643	0.102726	0.191629	27.4326	27.5767	27.3502	27.229	28.0259	27.5546	27.4174	27.6586	27.4936	6.49185	11
P0AD05	Uncharacterized protein YecA	yecA	0.26689	0.437753	0.406052	442.245	562.303	28.8318	28.7313	28.8084	28.7567	29.6215	29.4038	28.5842	28.5862	7	7	7	51.6	51.6	51.6	25.039	0	123.99	13683000000	113	457.756	426.644	450.295	434.284	795.678	683.194	384.899	385.441	14.2847	209.628	0.0323005	0.372802	29.2263	29.1257	29.2028	29.1511	30.0159	29.7982	28.9786	28.9807	29.1769	9.88417	15
Q1R3Z9;Q0TAE5;P0A860;P0A859;P0A858;B7NU88;B7NFL6;B7MI51;B7M6X0;B6I4R2;B5YZ57;B1XB85;B1LNM2;B1IVG0;A8A724;A7ZUD3;A1AI95	Triosephosphate isomerase	tpiA	0.266698	1.71003	0.164566	8490.68	10226.1	32.9258	33.2179	33.1732	33.107	33.5137	33.2743	33.2997	33.403	19	19	19	92.9	92.9	92.9	26.972	0	323.31	409770000000	953	7462.07	9155.49	8873.51	8471.67	11262.4	9524.59	9695.01	10422.3	740.928	793.017	0.0872637	0.0775485	33.2129	33.505	33.4603	33.3942	33.8008	33.5615	33.5868	33.6901	33.5332	12.8779	85
P0AD01;P0AD02;P59338	Transcriptional regulatory protein DcuR	dcuR	0.266458	0.917657	0.248817	156.519	191.162	27.3529	27.5063	27.3997	27.4709	27.9082	27.7399	27.2822	27.8653	7	7	7	39.3	39.3	39.3	27.488	0	88.629	4914100000	53	147.908	164.678	152.841	160.647	218.2	193.941	140.771	211.735	7.55616	35.1249	0.0482764	0.183744	27.6127	27.7661	27.6595	27.7307	28.168	27.9997	27.542	28.1251	27.7484	2.32193	4
P0AE22	Class B acid phosphatase	aphA	0.266019	0.516069	0.372738	680.131	845.389	29.4554	29.6682	29.3411	29.3392	30.1777	29.5651	29.1627	29.9624	9	9	9	41.4	41.4	41.4	26.103	0	161.08	26490000000	189	679.193	788.297	626.931	626.102	1126.21	733.414	553.335	968.593	76.2677	252.899	0.112137	0.299151	29.7898	30.0026	29.6754	29.6735	30.5121	29.8995	29.4971	30.2967	29.8447	10.7134	22
P00936;Q8XAP1;Q8FBP0	Adenylate cyclase	cyaA	0.265493	1.39005	0.189061	39.9336	48.3404	27.2324	27.3317	27.2529	27.4179	27.8208	27.6151	27.4254	27.4355	20	20	20	32.8	32.8	32.8	97.585	0	83.92	6990700000	146	37.8067	40.5273	38.3516	43.0486	57.0788	49.4238	43.2767	43.5823	2.38619	6.47594	0.0597541	0.133965	25.6644	25.7636	25.6848	25.8498	26.2527	26.0471	25.8574	25.8674	25.8536		23
P0A9D0;P0A9C9	Fructose-1,6-bisphosphatase class 2	glpX	0.264874	1.50072	0.179674	535.844	649.003	29.5172	29.5759	29.6109	29.5931	30.0868	29.7158	29.6797	29.8742	24	24	22	56	56	56	35.852	0	323.31	48373000000	373	514.699	536.29	549.598	542.787	766.918	591.499	576.724	660.87	15.1071	86.7482	0.028193	0.133664	29.3937	29.4524	29.4874	29.4696	29.9633	29.5923	29.5562	29.7507	29.5218	8.41363	54
P75682	Putative 2-dehydro-3-deoxy-D-gluconate aldolase YagE	yagE	0.264802	1.29502	0.200961	121.566	147.281	27.3388	27.2023	27.3598	27.3562	27.8006	27.5896	27.3071	27.6189	16	16	16	73.5	73.5	73.5	32.53	0	105.63	6847300000	118	123.542	112.284	125.381	125.057	170.711	147.259	120.837	150.316	6.23963	20.4733	0.051327	0.139008	27.3556	27.2191	27.3767	27.373	27.8175	27.6064	27.3239	27.6357	27.3748	9.52552	12
P08192	Dihydrofolate synthase/folylpolyglutamate synthase	folC	0.263751	0.638999	0.328371	301.904	373.113	29.0928	29.0722	29.0937	29.1249	29.769	29.3943	28.8229	29.4524	18	18	18	57.1	57.1	57.1	45.405	0	323.31	44589000000	394	301.229	296.903	301.409	308.074	483.609	372.024	249.361	387.459	4.61064	96.1439	0.0152719	0.25768	28.6286	28.6079	28.6294	28.6607	29.3047	28.9301	28.3587	28.9881	28.645	9.30606	49
P76372	Chain length determinant protein	wzzB	0.263606	0.660676	0.31963	1041.32	1280.42	30.7011	30.483	30.5242	30.47	31.2233	30.8312	30.3261	30.8521	21	21	21	69	69	69	36.454	0	323.31	108130000000	454	1159.41	995.232	1024.38	986.256	1671.23	1269.97	891.725	1288.77	80.394	318.327	0.0772039	0.248611	30.5536	30.3355	30.3767	30.3226	31.0758	30.6837	30.1787	30.7047	30.4652	11.1867	57
A1A9B1;B7MHH8;Q1RE52;Q8X6L0;Q8FJE0;Q0TJH6;P75825;C4ZY45;B7UMW5;B7NAM4;B7MQX7;B7M801;B7LD66;B6I8U4;B5YSG9;B1X814;B1IWP9;A7ZYH7;A7ZJU2;B1LN27;B7NPH0	Hydroxylamine reductase	hcp	0.262737	0.480089	0.389075	50.8659	59.821	26.4778	27.4696	26.7291	26.976	27.4285	27.1608	27.2933	26.8208	12	12	11	31.3	31.3	30.8	60.292	0	137.13	4605700000	95	36.2532	72.5997	43.2274	51.3832	70.5404	58.4813	64.1689	46.0934	15.7534	10.3931	0.309704	0.173737	25.6044	26.5963	25.8557	26.1026	26.5552	26.2874	26.42	25.9474	26.195		9
P37351	Ribose-5-phosphate isomerase B	rpiB	0.262302	0.229849	0.57418	360.58	317.281	27.7907	27.9874	26.0522	27.7658	27.7227	27.4051	27.7535	27.7641	4	4	4	27.5	27.5	27.5	16.073	0	12.904	2474100000	17	345.564	396.593		339.582	329.483	263.799	336.666	339.176	31.3316	35.8905	0.0868922	0.113119	28.8247	29.0214		28.7997	28.7566	28.4391	28.7874	28.798	28.798	6.20945	3
P0AA94;P0AA93	Sensor histidine kinase YpdA	ypdA	0.262063	1.02079	0.236801	25.2419	30.2095	26.2133	26.1406	25.9188	25.745	26.3696	26.4019	26.0565	26.238	5	5	5	10.6	10.6	10.6	62.657	0	16.432	1247700000	36	28.9765	27.5383	23.5767	20.876	32.3273	33.0662	25.9629	29.4814	3.69933	3.22542	0.146555	0.106769	25.2844	25.2117	24.9899	24.8161	25.4407	25.473	25.1276	25.3091	25.2481		6
P0A8I6;P0A8I5;B1IT47;A8A4A3;A7ZR85;Q0TDP1;Q8FE22;Q1R766;A1AFE6	tRNA (guanine-N(7)-)-methyltransferase	trmB	0.261956	1.08645	0.225568	948.992	1148.22	29.9841	29.9584	30.147	29.8908	30.5268	30.238	29.975	30.2884	10	10	10	50.2	50.2	50.2	27.307	0	291.31	45631000000	301	939.676	922.874	1053.16	880.261	1374.02	1122.43	933.689	1162.73	73.8088	180.635	0.0777759	0.157317	30.2535	30.2277	30.4163	30.1602	30.7962	30.5073	30.2443	30.5577	30.3349	9.80574	32
Q8X8E1;Q8FIM5;Q1RD35;Q0TIV5;P75959;C4ZS59;B7UPY3;B7NKG0;B7NAZ7;B7MTP9;B7MJA6;B7LX53;B7LG53;B6I9J7;B5YWJ2;B1XA29;B1LI25;B1IUE6;A7ZZ76;A7ZKM3;A1AA13	N-acetyl-D-glucosamine kinase	nagK	0.261811	0.634972	0.331238	76.5715	94.2856	26.7943	26.7008	26.5673	26.6345	27.2867	26.6245	26.5879	27.2451	7	7	7	21.5	21.5	21.5	33.011	0	21.991	3191800000	70	83.141	77.8753	70.9272	74.3425	117.364	73.8233	71.957	113.998	5.21809	24.7553	0.0681467	0.262556	26.7899	26.6965	26.563	26.6302	27.2823	26.6201	26.5836	27.2407	26.6633	4.24793	5
P0A9H4;P0A9H3	Inducible lysine decarboxylase	cadA	0.261662	0.452392	0.403893	164.259	187.99	28.3883	29.6482	28.955	28.9933	29.293	29.1893	29.3365	29.2126	30	30	30	61.4	61.4	61.4	81.259	0	323.31	49280000000	520	102.179	246.853	151.937	156.069	192.503	179.022	198.463	181.973	60.2622	9.06822	0.366872	0.0482377	27.0844	28.3442	27.6511	27.6894	27.989	27.8853	28.0326	27.9087	27.897		47
Q1RFC8;Q0TKM8;P0A8D2;P0A8D1;P0A8D0;C4ZTH0;B7UJN6;B7NJ84;B7N8W5;B7MQC8;B7MD71;B7M3Q2;B7L647;B6HZL4;B5Z3R7;B1XF01;B1LJG3;B1J036;A7ZX65;A7ZIG6;A1A883	Transcriptional repressor NrdR	nrdR	0.260451	0.664589	0.324356	1500.4	1829.05	30.1619	30.075	29.8028	29.8836	30.6383	30.2979	29.8142	30.2147	7	7	7	50.3	50.3	50.3	17.229	0	209.81	23344000000	157	1694.64	1594.51	1317.87	1394.57	2365.55	1863.86	1328.46	1758.35	174.266	426.08	0.116146	0.232951	31.0957	31.0087	30.7366	30.8174	31.5721	31.2316	30.748	31.1484	31.0522	7.80736	20
P16700	Thiosulfate-binding protein	cysP	0.259914	0.985345	0.248047	121.333	147.223	27.5592	27.6072	27.4841	27.4332	28.1145	27.8118	27.4902	27.7068	16	16	16	54.1	54.1	54.1	37.614	0	89.763	10254000000	195	124.491	128.746	118.115	113.979	183.647	148.581	118.623	138.042	6.56688	27.2688	0.0541228	0.185221	27.3665	27.4145	27.2914	27.2405	27.9218	27.6192	27.2975	27.5141	27.3905	9.65105	27
Q1RC02;P41407;B1ISN3;A7ZZX1;A7ZLK8;Q8X9S9;Q0TI03;Q8FHN0	FMN-dependent NADH:quinone oxidoreductase	azoR	0.25932	0.825041	0.282463	306.352	372.753	28.1408	28.04	28.085	27.916	28.5621	28.5591	28.106	27.9919	8	8	7	66.2	66.2	55.2	21.641	0	76.279	6140200000	104	326.962	304.687	314.422	279.338	439.118	438.2	319.097	294.597	20.1859	76.7573	0.0658912	0.20592	28.7457	28.6449	28.6898	28.5208	29.1669	29.1639	28.7109	28.5968	28.7003	8.80735	13
P0AEQ5;P0AEQ4;P0AEQ3	Glutamine-binding periplasmic protein	glnH	0.25878	1.50791	0.187351	2734.82	3283.95	31.6075	31.3525	31.5584	31.4838	31.9476	31.6988	31.6004	31.7904	18	18	18	64.9	64.9	64.9	27.19	0	323.31	108430000000	567	2940.85	2460.07	2841.45	2696.91	3731.61	3135.11	2926.33	3342.76	208.762	343.466	0.0763349	0.104589	31.883	31.628	31.8339	31.7593	32.2231	31.9744	31.8759	32.066	31.8795	12.4558	76
A7ZVQ2;B7LEK9;C4ZT45;B7NH31;B7MNB4;B7LXS5;P0A8J2;B6I2P5;B1XFH3;B1LEG6;A8A891;Q8XB55;B1IS56;B5Z4P5;A1AJN5;B7N381;B7NVD2;Q0T8V0;Q1R2E3;Q8FA72;B7UQZ1	Primosomal protein 1	dnaT	0.258257	1.5958	0.181103	417.231	500.506	28.1893	28.3276	28.3551	28.4569	28.7629	28.5935	28.4325	28.5731	6	6	6	60.9	60.9	60.9	19.455	0	116.19	5527000000	77	376.669	414.951	423.027	454.276	562.807	499.865	446.578	492.773	31.9187	47.7836	0.0765013	0.0954706	28.9478	29.086	29.1136	29.2154	29.5213	29.3519	29.1909	29.3315	29.2031	7.12928	11
P05706	PTS system glucitol/sorbitol-specific EIIA component	srlB	0.25825	0.280895	0.526001	459.162	558.253	28.536	27.5778	27.4581	27.8633	28.6383	27.9402	27.3589	28.5308	6	6	6	78	78	78	13.304	0	173.95	6454300000	66	704.82	360.352	331.385	440.091	757.155	464.439	309.154	702.264	170.1	209.087	0.370457	0.374538	29.8427	28.8845	28.7648	29.17	29.945	29.2469	28.6657	29.8375	29.2085	9.02791	11
P0AEK5;P0AEK4	Enoyl-[acyl-carrier-protein] reductase [NADH] FabI	fabI	0.25753	1.20649	0.214352	8986.31	10852	33.2853	33.2296	33.1537	33.2803	33.4454	33.3619	33.3576	33.8141	17	17	17	64.1	64.1	64.1	27.864	0	323.31	551520000000	825	9287.45	8932.6	8470.07	9255.13	10389.5	9799.29	9769.69	13449.4	379.621	1755.01	0.0422444	0.161723	33.5255	33.4698	33.3939	33.5205	33.6856	33.6021	33.5978	34.0543	33.5616	13.1971	90
B1XFT8;C4ZUV3;P33667;B1LKC2;Q8XCZ2;B7L7D0;B5YPM0;B7M4K7;B1IZ97;A7ZXF7;A7ZIR0;B6I0F4;B7N958;A1A8G9;B7ME26;Q0TKD8;Q1RF31;B7UKI1;B7MQL5;Q8FK67	tRNA 2-selenouridine synthase	selU	0.256741	0.807134	0.290187	66.5797	80.3461	26.7054	26.7371	27.0307	26.6713	27.3341	26.87	26.7634	27.204	9	9	9	39.8	39.8	39.8	41.11	0	69.224	2552200000	50	62.5967	64.0011	78.6033	61.1177	97.208	70.2397	65.1919	88.7447	8.10175	15.1289	0.121685	0.188297	26.3845	26.4162	26.7097	26.3504	27.0132	26.5491	26.4426	26.8831	26.4958	3.32193	4
Q46925	Cysteine desulfurase CsdA	csdA	0.256524	0.737587	0.307402	164.417	198.711	27.9299	28.3688	28.1563	28.1408	28.7834	28.452	28.1011	28.2853	10	10	10	44.4	44.4	44.4	43.234	0	118.98	10030000000	115	140.207	190.652	164.293	162.517	254.868	202.084	158.07	179.821	20.64	41.5274	0.125534	0.208984	27.5363	27.9752	27.7627	27.7472	28.3899	28.0584	27.7076	27.8917	27.8272	4.64386	9
P75728	3-demethoxyubiquinol 3-hydroxylase	ubiF	0.256433	0.657554	0.331467	235.871	284.731	28.5298	28.7933	28.4108	28.8707	29.2843	28.7745	28.5727	28.9987	11	11	11	43.7	43.7	43.7	42.953	0	303.73	15572000000	170	214.803	258.325	197.64	272.716	364.32	254.954	221.361	298.291	35.4363	61.7002	0.150236	0.216696	28.1456	28.4091	28.0267	28.4865	28.9002	28.3904	28.1885	28.6146	28.3997	5.52356	18
A1AEY5;Q8X6R9;Q8FEF2;Q1R7P3;Q0TE61;P38506;C4ZZV3;B7UHL4;B7NVU6;B7N732;B7MLB9;B7LXL4;B7LEX6;B6I6J6;B1XDK7;A8A3T3;A7ZQP2;B7MZ94	Flap endonuclease Xni	xni	0.255769	0.660123	0.331165	77.6175	93.009	26.3647	26.1559	26.7681	26.5036	26.5332	26.5149	27.0944	26.6729	7	7	7	37.5	37.5	37.5	28.135	0	136.09	2088400000	65	72.3268	62.4903	95.9355	79.7173	81.3838	80.3505	120.553	89.7482	14.1042	18.8388	0.181714	0.202549	26.5909	26.3821	26.9944	26.7298	26.7594	26.7412	27.3206	26.8991	26.7503	2.58496	6
P0A6B4;Q8X5V2;Q8FB20	Alanine racemase, biosynthetic	alr	0.255689	0.986516	0.249602	127.312	153.039	27.804	27.573	27.7158	27.4814	28.0782	27.9184	27.5784	28.022	12	12	12	48.7	48.7	48.7	39.152	0	65.31	9050700000	105	141.903	120.719	133.41	113.216	171.942	153.738	121.17	165.306	12.8095	22.5382	0.100615	0.147271	27.5535	27.3225	27.4653	27.2309	27.8277	27.6679	27.3279	27.7715	27.5094	3.90689	12
P29745;C4ZS67;B1XA37;Q1RD26;P65804;P65803;B7UQ36;B7N3N7;B7MTQ8;B7MJB5;B1IUE0;A7ZZ82;A1AA21;B6I9K6;A7ZKR7;Q0TIU6	Peptidase T	pepT	0.25505	1.5141	0.193351	651.921	776.59	30.0431	30.4069	30.1365	30.1061	30.368	30.4843	30.3453	30.5152	17	17	17	51.2	51.2	51.2	44.923	0	323.31	73061000000	404	592.278	764.094	632.309	619.001	743.554	806.666	731.845	824.297	76.6123	45.7313	0.117518	0.0588873	29.5942	29.958	29.6876	29.6573	29.9191	30.0355	29.8964	30.0663	29.9078	7.67242	56
P0AEJ7;P0AEJ6	Ethanolamine ammonia-lyase large subunit	eutB	0.254969	1.13151	0.228789	92.702	111.645	27.526	27.6179	27.5634	27.4103	28.0499	27.8432	27.5297	27.7146	12	12	12	34.7	34.7	34.7	49.403	0	139.34	7178000000	125	92.3509	98.4877	94.8031	85.1666	133.28	115.319	92.5924	105.387	5.62123	17.1632	0.0606376	0.153731	26.94	27.0318	26.9774	26.8243	27.4639	27.2572	26.9437	27.1286	27.0046	5.97728	12
P69743;P69742;P69741	Hydrogenase-2 small chain	hybO	0.25419	0.308127	0.505481	447.434	543.069	28.9793	29.9521	29.2076	29.5206	28.8466	29.8678	30.0308	29.9311	9	9	9	35.5	35.5	35.5	39.652	0	154.52	21648000000	123	319.018	630.403	374.295	466.018	290.712	594.268	666.091	621.207	136.214	170.827	0.304435	0.314558	28.7105	29.6833	28.9387	29.2518	28.5778	29.599	29.762	29.6623	29.4254		12
A1A8D7;B7N924;Q0TKH0;P0A8B7;P0A8B6;P0A8B5;C4ZUS5;B7UKF1;B7NIF9;B7MQI6;B7MDZ3;B7L796;B6I0C3;B5Z3Y1;B1XFQ8;B1LJM8;B1IZC3;A7ZXC9;A7ZIN1;B7M3W3	Nucleoid-associated protein YbaB	ybaB	0.253864	0.661126	0.333574	2507.34	3071.37	30.2641	30.1879	30.2379	30.1114	30.99	30.3589	30.2008	30.267	9	9	9	75.2	75.2	75.2	12.015	0	323.31	48789000000	339	2619.65	2483.62	2572.04	2354.03	4354.83	2799.49	2506.19	2624.98	116.713	864.077	0.0465487	0.281333	31.7178	31.6416	31.6916	31.5651	32.4437	31.8126	31.6546	31.7207	31.7047	13.5463	35
P0AF17;P0AF16	Probable lipid II flippase MurJ	murJ	0.253835	0.494969	0.392905	68.4063	84.5718	27.3507	27.2378	27.3477	27.084	28.0559	27.6116	27.3957	26.9724	7	7	7	16	16	16	55.267	0	41.768	4788500000	82	72.9355	67.3936	72.785	60.511	119.501	87.5542	75.269	55.9629	5.86084	26.6707	0.0856769	0.315361	26.6029	26.49	26.5999	26.3361	27.3081	26.8638	26.6478	26.2245	26.6014		10
P76086	Transcriptional repressor PaaX	paaX	0.25332	0.284751	0.525879	66.0232	65.2171	26.25	25.538	26.1366	27.0954	26.7532	26.1951	26.1904	26.8945	6	6	6	33.9	33.9	33.9	35.294	0	49.412	1488400000	32	53.0885		49.033	95.9483	75.5054	51.0866	50.9184	83.3578	25.995	16.7238	0.393725	0.256433	26.1492		26.0357	26.9945	26.6523	26.0943	26.0896	26.7936	26.1492	5	4
P46859	Thermoresistant gluconokinase	gntK	0.252809	0.930046	0.268385	6672.97	8060.43	32.3592	32.2655	32.2211	32.3547	32.7873	32.7171	32.1885	32.5187	11	11	11	59.4	59.4	59.4	19.543	0	323.31	145440000000	410	6948.97	6507.54	6308.31	6927.06	9377.56	8927.98	6166.26	7769.92	316.797	1432.92	0.0474747	0.177772	33.1112	33.0174	32.973	33.1067	33.5393	33.4691	32.9405	33.2707	33.1089	4.24793	37
P37773	UDP-N-acetylmuramate--L-alanyl-gamma-D-glutamyl-meso-2,6-diaminoheptandioate ligase	mpl	0.252073	1.08125	0.242464	542.887	654.18	30.0349	30.1469	30.03	30.0634	30.6398	30.3497	30.1955	30.0984	19	19	19	57.5	57.5	57.5	49.874	0	323.31	98383000000	576	529.855	573.077	528.056	540.561	809.28	660.546	592.951	553.944	20.8699	112.387	0.0384425	0.171799	29.4352	29.5472	29.4303	29.4637	30.0401	29.75	29.5958	29.4987	29.5229	9.46148	69
Q1RFS8;Q0TL74;P0A7B7;P0A7B6;P0A7B5;C4ZT99;B7UJD0;B7NK83;B7N8H3;B7MQ78;B7MC92;B7M271;B7L3Z4;B6I022;B5Z1I6;B1XDY5;B1LHT8;B1J0Z2;A7ZWK5;A7ZI01;A1A7V3	Glutamate 5-kinase	proB	0.251698	1.64319	0.187626	482.408	577.935	29.568	29.5904	29.5138	29.5188	29.9646	29.7755	29.5872	29.8705	24	24	24	71.9	71.9	71.9	39.056	0	323.31	50359000000	379	489.153	496.916	470.962	472.6	645.726	565.643	495.804	604.567	12.6913	63.7741	0.0263083	0.110348	29.321	29.3435	29.2669	29.2718	29.7176	29.5285	29.3403	29.6236	29.3419	9.66534	53
P24205	Lipid A biosynthesis myristoyltransferase	lpxM	0.251551	1.29751	0.21393	406.252	484.144	29.2838	29.1996	29.0451	29.4095	29.6703	29.5101	29.4053	29.3585	12	12	12	47.7	47.7	47.7	37.41	0	173.6	15726000000	153	418.737	394.748	354.283	457.24	548.84	490.621	455.904	441.211	43.1617	47.8481	0.106244	0.0988304	29.099	29.0147	28.8603	29.2246	29.4854	29.3253	29.2205	29.1737	29.1971	7.09803	15
Q1RCQ5;Q0TII4;P76007;P0A3R8;P0A3R7;C4ZTN2;B7UQ75;B7NUV2;B7N3Z7;B7MTW9;B7MK88;B7LXA5;B7LGV1;B5YXL5;B1XA78;B1LHX5;B1IUA1;A7ZZC5;A7ZKW2;A1AAB4	K(+)/H(+) antiporter NhaP2	nhaP2	0.250634	0.572919	0.368817	22.1167	27.3245	25.8347	26.1849	25.6929	25.4566	26.2895	25.7427	26.2615	25.878	5	5	5	11.1	11.1	11.1	62.205	0	15.25	853260000	21	22.3925	28.6144	20.2754	17.1845	30.7874	20.9956	30.1905		4.83093	5.48911	0.218429	0.200886	24.9163	25.2665	24.7744	24.5382	25.371	24.8243	25.3431		24.9163	2.32193	3
P77499	Probable ATP-dependent transporter SufC	sufC	0.25048	1.06142	0.248575	107.036	128.697	26.8977	26.9849	26.8934	26.8016	27.4196	27.2076	26.8604	27.0918	11	11	11	53.2	53.2	53.2	27.582	0	47.459	4562100000	100	107.173	113.92	106.853	100.197	154.453	133.144	104.412	122.778	5.60399	20.88	0.0523561	0.162242	27.1526	27.2398	27.1483	27.0564	27.6745	27.4625	27.1153	27.3467	27.1962	8.21917	6
B1X9H2;C4ZRZ9;P40874;B7NAT4;A7ZKG4;A7ZZ17;B1IV43;B6I9D6;B7M934;B7LFZ3;Q8FIR3;Q1RD98;Q0TJ15;B7MIK0;A1A9V4;B1LIV1;B7MTJ0;B7NL75;B7UP73;B5YVS9;P58523	N-methyl-L-tryptophan oxidase	solA	0.250328	0.848432	0.290438	207.11	250.457	28.44	28.4276	28.3151	28.4418	29.0145	28.6116	28.3095	28.6902	20	20	20	64.5	64.5	64.5	40.902	0	323.31	21838000000	260	211.932	210.103	194.197	212.208	316.89	238.991	193.427	252.52	8.65923	50.9951	0.0418098	0.203608	28.1264	28.114	28.0016	28.1282	28.701	28.298	27.9959	28.3767	28.1273	8.97154	23
B1X701;C4ZSF3;P28248;B7M449;P63902;P63901;B7UTA3;B7NQC0;B7NCA1;B7MWX9;B7ME78;Q1RA05;Q0TG25;B6I8D6;B5YUC5;B1LNX6;B1IZ09;A8A1T7;A7ZNN9;A1ACS1;B7L9T9	dCTP deaminase	dcd	0.250082	0.516244	0.389201	305.825	372.107	28.1052	28.253	27.832	27.8405	28.7384	28.4139	27.8717	28.007	10	10	10	49.7	49.7	49.7	21.249	0	105.58	9732600000	116	324.861	360.256	268.286	269.897	506.084	403.215	275.852	303.276	44.815	104.754	0.146538	0.281517	28.7364	28.8842	28.4631	28.4717	29.3696	29.045	28.5029	28.6382	28.6873	9.33316	13
P39099	Periplasmic pH-dependent serine endoprotease DegQ	degQ	0.248987	0.760554	0.311238	145.823	176.467	28.1754	28.1535	28.1005	28.0162	28.5842	28.3333	27.9252	28.5988	18	18	16	50.8	50.8	47.5	47.204	0	323.31	15560000000	197	152.362	150.052	144.586	136.292	202.864	170.172	127.886	204.945	7.14154	36.09	0.0489741	0.204514	27.655	27.6332	27.5802	27.4959	28.0639	27.8129	27.4049	28.0785	27.6441	9.72792	29
P0AEJ4	Sensor histidine kinase EnvZ	envZ	0.248875	1.07655	0.248455	391.948	470.374	29.6977	29.6708	29.5828	29.5111	30.1643	29.7676	29.8888	29.6371	14	14	13	40.2	40.2	36.2	50.333	0	31.216	9285700000	66	414.591	406.848	382.534	363.818	574.797	435.395	473.945	397.358	23.1995	76.3149	0.0591903	0.162243	29.0848	29.0579	28.9699	28.8982	29.5514	29.1547	29.2759	29.0241	29.0713		10
P37647;E0J5J4	2-dehydro-3-deoxygluconokinase	kdgK	0.248386	0.629795	0.351411	671.217	803.459	29.6491	30.0877	29.5786	29.8995	30.4069	30.1796	29.7858	29.8362	10	10	10	46.9	46.9	46.9	33.962	0	323.31	34572000000	181	596.26	810.544	567.551	710.513	1013.56	864.449	656.14	679.683	111.537	168.214	0.166171	0.209362	29.6038	30.0423	29.5333	29.8542	30.3616	30.1343	29.7405	29.7908	29.8225	9.91886	25
P37634	Ribosomal RNA large subunit methyltransferase J	rlmJ	0.246448	0.763098	0.314729	923.32	1111.03	30.1561	30.3417	30.0133	30.2104	30.8364	30.3754	30.1639	30.3315	19	19	19	83.2	83.2	83.2	31.941	0	207.79	49836000000	401	904.673	1030.24	818.632	939.735	1456.71	1054.88	909.633	1022.9	87.5768	238.727	0.0948499	0.21487	30.1992	30.3849	30.0565	30.2536	30.8796	30.4186	30.207	30.3747	30.3141	9.07682	45
Q1R7I6;Q0TE05;P0A886;P0A885;P0A884;C4ZZX9;B7UHP4;B7NVX2;B7N759;B7MZC6;B7MLH3;B7LY83;B7LF04;B1IU17;A8A3W0;A7ZQT3;A1AF39	Thymidylate synthase	thyA	0.246423	0.800478	0.305788	836.411	1011.18	29.9932	29.9935	29.99	29.9279	30.6147	30.3104	29.9596	30.0056	11	11	11	45.8	45.8	45.8	30.479	0	166.24	39476000000	163	846.309	846.469	844.385	808.481	1307.65	1056.76	826.632	853.664	18.6438	222.74	0.0222903	0.220278	30.104	30.1043	30.1007	30.0387	30.7254	30.4212	30.0704	30.1164	30.1041	9.50779	26
Q1RD66;Q0TIY3;P0A6R2;P0A6R1;P0A6R0;A7ZKJ4;A1A9Y5;B1IUH4;A7ZZ48	Beta-ketoacyl-[acyl-carrier-protein] synthase III	fabH	0.246095	0.672365	0.343445	3460.95	4208.96	32.126	32.1206	32.1252	32.194	32.8667	32.429	32.0865	32.168	15	15	15	63.7	63.7	63.7	33.515	0	323.31	173540000000	508	3422.98	3409.95	3420.99	3589.89	5749.17	4231.93	3329.61	3525.11	86.1504	1097.52	0.0248921	0.260759	32.0998	32.0944	32.099	32.1678	32.8404	32.4028	32.0603	32.1418	32.1208	11.7973	57
Q0TKG8;P0A6Z5;P0A6Z4;P0A6Z3;B1IZC1;A7ZXD1;Q1RF62;A1A8D9	Chaperone protein HtpG	htpG	0.245494	2.02013	0.175191	1637.87	1946.35	32.22	32.1781	32.2127	32.0413	32.5604	32.3579	32.3602	32.3556	50	1	1	77.6	3.4	3.4	71.422	0	298.02	46870000000	67	1702.43	1653.18	1693.71	1502.15	2160.5	1874.91	1878.01	1871.98	92.9864	142.788	0.0567728	0.0733618	31.1023	31.0603	31.0949	30.9235	31.4426	31.2401	31.2424	31.2379	31.1701	12.9874	11
P11868;Q8XAF1;P59244	Propionate kinase	tdcD	0.245111	0.359474	0.479822	183.922	211.37	27.825	28.8791	27.8454	28.4607	28.9167	28.3347	28.4723	28.2669	12	12	11	30.1	30.1	27.6	43.384	0	177.54	8616000000	104	129.825	271.563	131.695	202.607	278.815	185.503	204.265	176.897	67.5382	46.3924	0.36721	0.219484	27.4264	28.4805	27.4468	28.0621	28.5181	27.9361	28.0738	27.8683	27.9991		6
P0ABR3;P0ABR2;P0ABR1	DNA damage-inducible protein I	dinI	0.243759	0.798828	0.310699	380.868	452.121	27.3337	27.1436	26.8874	26.9291	27.5377	27.3957	27.3227	27.0127	4	4	4	51.9	51.9	51.9	8.9489	0	21.943	2758300000	64	453.383	396.86	331.701	341.528	522.985	473.504	449.889	362.105	56.2116	67.2976	0.147588	0.148849	29.2125	29.0224	28.7662	28.8079	29.4165	29.2746	29.2015	28.8915	29.1119	7.82018	8
P61517	Carbonic anhydrase 2	can	0.243651	0.536592	0.389046	1943.02	2362.83	31.0802	30.7544	30.9354	30.8072	31.6168	31.2919	30.7372	30.9061	11	11	11	58.6	58.6	58.6	25.096	0	323.31	61140000000	268	2204.49	1754.79	1991.86	1820.96	3209.58	2556.58	1733.76	1951.4	200.901	663.209	0.103396	0.280684	31.4714	31.1455	31.3265	31.1984	32.0079	31.683	31.1283	31.2972	31.3118	11.1793	39
Q0TF00;P0A7D9;P0A7D8;P0A7D7;C4ZX51;B7UGM6;B7NQL4;B7N658;B7MYB5;B7MHW9;B7M7H9;B7LCL4;B6I546;B5Z013;B1XAE8;B1LNC6;B1IWI3;A8A2W8;A7ZPS1	Phosphoribosylaminoimidazole-succinocarboxamide synthase	purC	0.242589	1.01663	0.269151	560.782	668.553	29.0467	29.2924	29.2579	29.3089	29.756	29.3774	29.2541	29.4889	9	9	9	49.8	49.8	49.8	26.995	0	304.69	17827000000	154	493.149	585.726	571.735	592.519	810.317	621.611	570.196	672.088	45.9116	103.259	0.0818707	0.154452	29.3326	29.5783	29.5438	29.5948	30.0419	29.6633	29.54	29.7748	29.5866	10.5488	19
Q1R7N6;Q0TE55;P0AEP0;P0AEN9;P0AEN8;C4ZZV9;B7UHM0;B7NVV2;B7N738;B7MZA0;B7MLC5;B7LXM0;B7LEY4;B6I6K2;B5Z4C4;B1XDL3;B1LQZ8;B1IU37;A8A3T9;A7ZQP8;A1AEZ1	L-fucose mutarotase	fucU	0.242545	0.444705	0.427474	266.457	324.391	27.3683	27.1162	27.6256	27.3009	28.1131	27.5162	27.0501	27.7017	6	6	6	55.7	55.7	55.7	15.473	0	25.207	3090400000	35	267.156	223.937	319.898	254.838	450.037	296.314	213.802	337.411	39.9971	98.2762	0.150107	0.302956	28.4571	28.2051	28.7144	28.3897	29.202	28.6051	28.1389	28.7906	28.5311	8.27146	4
Q46855	Uncharacterized HTH-type transcriptional regulator YqhC	yqhC	0.242142	0.966392	0.279682	107.691	128.004	27.4107	27.3187	27.0504	27.343	27.8091	27.4405	27.3411	27.5007	7	7	7	30.5	30.5	30.5	35.956	0	80.287	3502000000	75	117.427	110.103	91.246	111.99	155.209	119.9	111.844	125.061	11.3948	18.9351	0.105809	0.147926	27.2831	27.1911	26.9228	27.2154	27.6815	27.3128	27.2135	27.373	27.2492	0	9
A1AGB7;B7MBY5;Q0TCP3;P0A762;P0A761;C4ZSW1;B7UJV6;B7NDK1;B7M0T5;B6I1U1;B1XHJ6;B1LGI8;B1IQQ6;A8A533;Q8X9G9;A7ZSB6;B5YSV0;B7NKT4	Putative N-acetylmannosamine-6-phosphate 2-epimerase	nanE	0.241919	0.341246	0.490915	364.159	454.33	28.3379	28.7166	28.3009	28.3988	29.3169	28.5582	27.9516	28.8952	7	7	7	54.1	54.1	54.1	24.073	0	72.077	9660800000	111	337.057	439.401	328.429	351.75	668.947	393.256	257.182	497.937	51.0769	173.742	0.14026	0.382414	28.7891	29.1678	28.752	28.85	29.7681	29.0093	28.4028	29.3464	28.9297	9.76984	12
P0ADU6;P0ADU5	Protein YgiW	ygiW	0.241353	1.15351	0.249142	716.995	855.722	28.6873	28.6724	28.5641	28.6133	28.707	28.9041	28.7267	29.1647	6	6	6	40.8	40.8	40.8	14.011	0	98.512	11512000000	109	743.684	735.966	682.19	706.139	754.023	865.599	764.468	1038.8	28.2925	132.015	0.0394599	0.154273	29.9194	29.9045	29.7961	29.8454	29.9391	30.1362	29.9587	30.3967	29.9292	11.0815	17
P06136	Cell division protein FtsQ	ftsQ	0.24073	1.05157	0.266001	74.8853	88.8428	26.4363	26.6338	26.4565	26.747	27.0656	26.7335	26.6323	26.8051	7	7	7	35.5	35.5	35.5	31.433	0	94.886	2962800000	83	67.9912	78.0751	68.9592	84.5155	105.634	83.7193	77.9921	88.0256	7.86478	11.9248	0.105024	0.134224	26.5026	26.7001	26.5228	26.8133	27.1319	26.7998	26.6986	26.8714	26.75		10
P77808;C4ZU91;B7LAR4;B6I7H5;B1X8W2;B1IXT8;B1LLK3;B7N5L4	NMN amidohydrolase-like protein YfaY	yfaY	0.240729	0.727047	0.333352	270.066	325.266	28.9191	28.8881	28.8016	28.9808	29.5358	29.2064	28.7904	29.02	11	11	1	40.2	40.2	3	44.225	0	210.16	21680000000	171	273.912	268.048	252.285	286.02	421.827	334.954	250.32	293.962	14.0184	73.0632	0.0519075	0.224626	28.4928	28.4619	28.3753	28.5546	29.1095	28.7801	28.3641	28.5937	28.5237	7.52356	24
P0AAZ6;P0AAZ5;P0AAZ4	Replication-associated recombination protein A	rarA	0.240329	0.593897	0.373438	122.224	147.446	28.1253	27.9444	27.8491	27.7891	28.6283	28.0115	27.8037	28.2258	19	19	19	53	53	53	49.626	0	264.81	9535600000	175	139.868	123.226	115.272	110.53	198.911	129.151	111.667	150.057	12.8762	37.7288	0.105349	0.255881	27.5328	27.3519	27.2566	27.1966	28.0358	27.419	27.2112	27.6333	27.3854	3.90689	24
P25437;Q8X5J4;B1J085;A7ZX04;A7ZIA4;Q8FKG1;Q1RFI7;Q0TKS7;A1A835;B1LIP1	S-(hydroxymethyl)glutathione dehydrogenase	frmA	0.238521	0.863494	0.304609	1082.2	1295.35	30.7092	30.6224	30.7181	30.798	31.3276	30.8963	30.6917	30.8861	20	20	20	61.2	61.2	61.2	39.359	0	292.34	62692000000	285	1079.09	1015.47	1085.86	1148.36	1663.89	1230.15	1066	1221.38	54.3222	256.999	0.0501963	0.198401	30.451	30.3642	30.46	30.5399	31.0695	30.6382	30.4336	30.6279	30.4999	10.5774	33
P28905	DNA polymerase III subunit chi	holC	0.238165	0.531416	0.395071	180.147	214.469	26.577	26.8924	27.2011	26.9007	27.5089	27.2572	26.7474	27.0103	5	5	5	45.6	45.6	45.6	16.633	0	19.679	1899200000	29	142.708	177.968	220.905	179.008	274.042	229.758	160.79	193.287	31.9842	48.6924	0.177545	0.227037	27.5616	27.8769	28.1856	27.8852	28.4935	28.2417	27.7319	27.9948	27.94	3.80735	5
B7MR93;B7LA67;C6UJK3;C5WBK5;C5A0R4;B7M721;P23003;B6I5I3;B1XBX6;B1IVB3;A8A773;A7ZUI5;B1LNS5;B7NFR5;B7NU35;B7UNU5;Q8X723;A1AIE7;B7MIA5;Q0TA91;Q1R3U2;B5Z069;Q8CXW3	tRNA/tmRNA (uracil-C(5))-methyltransferase	trmA	0.238156	0.819424	0.314578	403.388	483.267	29.379	29.3025	29.4449	29.46	30.0024	29.7062	29.4086	29.4218	23	23	22	78.4	78.4	73.8	42.014	0	323.31	40877000000	377	398.079	377.323	416.859	421.292	615.897	500.572	406.415	410.183	20.0797	98.5526	0.0497775	0.20393	29.0267	28.9503	29.0926	29.1077	29.6501	29.354	29.0563	29.0695	29.0811	7.13955	41
P0AGD5;P0AGD4;P0AGD3	Superoxide dismutase [Fe]	sodB	0.237356	0.616386	0.370265	15626.3	18766.6	33.6418	33.4897	33.5736	33.8268	34.27	33.9833	33.4806	33.7475	11	11	11	94.8	94.8	94.8	21.265	0	323.31	583610000000	1876	15663.3	14081.1	14932.7	17828.3	24316.2	19893.3	13991.5	16865.3	1604.07	4415.3	0.102652	0.235275	34.2719	34.1199	34.2037	34.4569	34.9001	34.6134	34.1107	34.3776	34.3248	14.4604	238
P28630	DNA polymerase III subunit delta	holA	0.237295	0.409941	0.453001	67.021	82.1911	26.7304	26.6491	26.9139	26.5445	27.5044	27.0755	26.3315	26.8756	8	8	8	28.6	28.6	28.6	38.703	0	73.401	3665100000	87	67.7033	63.9576	76.9841	59.439	116.401	86.2087	51.2058	74.9487	7.45207	27.074	0.11119	0.329404	26.4965	26.4153	26.68	26.3106	27.2705	26.8417	26.0977	26.6417	26.5691		10
P0AGL8;P0AGL7	Ribosomal RNA small subunit methyltransferase E	rsmE	0.237278	1.24865	0.244656	329.563	391.46	28.503	28.5111	28.4784	28.3846	28.8674	28.7125	28.4341	28.8123	10	10	10	53.9	53.9	53.9	26.978	0	80.037	11896000000	105	337.234	339.15	331.476	310.391	435.234	390.498	321.343	418.763	13.1909	50.2624	0.0400254	0.128397	28.7898	28.7979	28.7652	28.6714	29.1542	28.9993	28.7209	29.0991	28.7939	7.14975	8
P0AEB8;P0AEB7	RutC family protein YoaB	yoaB	0.237234	0.737839	0.335767	4732.13	5584.43	30.9464	31.4113	30.979	31.269	31.6591	31.4637	31.272	31.1598	6	6	6	76.3	76.3	76.3	12.493	0	96.747	34057000000	135	4060.87	5623.25	4154.45	5089.94	6688.62	5833.31	5100.46	4715.35	754.194	869.999	0.159377	0.15579	32.3439	32.8088	32.3764	32.6665	33.0566	32.8612	32.6694	32.5573	32.668	10.7846	18
P0C0L2	Peroxiredoxin OsmC	osmC	0.236779	0.781796	0.325473	902.838	1067.4	29.107	28.9021	28.9108	29.3225	29.3425	28.993	29.3196	29.5344	5	5	5	48.3	48.3	48.3	15.088	0	263.47	8995700000	85	925.78	802.076	806.943	1076.55	1091.73	854.777	1074.4	1248.7	129.166	161.987	0.143066	0.151758	30.2322	30.0273	30.036	30.4477	30.4677	30.1182	30.4448	30.6595	30.3385	11.6821	12
P76015	PEP-dependent dihydroxyacetone kinase, dihydroxyacetone-binding subunit DhaK	dhaK	0.236144	0.42897	0.443562	826.361	1013.51	30.1972	30.3726	30.1629	30.3944	31.1042	30.5284	29.9399	30.4992	11	11	11	48.6	48.6	48.6	38.215	0	323.31	45903000000	304	776.83	878.371	758.407	891.837	1465.95	979.58	648.753	959.777	68.4672	337.532	0.0828538	0.333031	29.9816	30.1571	29.9474	30.1788	30.8886	30.3129	29.7243	30.2837	30.168	9.88417	36
P75974	Prophage repressor CohE	cohE	0.235686	0.313919	0.520235	105.199	130.029	27.1183	26.5122	26.649	26.5756	27.6836	27.0769	26.3569	26.6803	4	4	4	25.4	25.4	25.4	25.094	0	48.475	2093100000	46	137.609	90.0169	99.0666	94.104	204.429	133.678	80.7442	101.264	21.9209	54.176	0.208376	0.416647	27.5096	26.9034	27.0402	26.9668	28.0749	27.4682	26.7481	27.0715	27.0559	2.58496	6
P0AB82;P0AB81;P0AB80	Branched-chain-amino-acid aminotransferase	ilvE	0.235491	0.96045	0.291199	200.385	236.743	27.9061	28.1416	28.0265	28.287	28.5654	28.3211	28.0977	28.3189	10	10	10	38.5	38.5	38.5	34.093	0	140.37	8992100000	85	175.284	206.706	190.7	228.851	278.103	234.392	200.453	234.025	22.9066	31.8356	0.114313	0.134473	27.8552	28.0907	27.9756	28.2361	28.5145	28.2703	28.0468	28.268	28.1634	10.4398	9
Q46857;Q8XBT6	2,5-diketo-D-gluconic acid reductase A	dkgA	0.234962	0.988158	0.288362	363.96	433.203	28.8393	28.7513	28.8683	28.8085	29.2307	29.0396	28.718	29.2189	18	18	18	68.4	68.4	68.4	31.109	0	133.37	16874000000	200	369.55	347.476	377.131	361.684	486.077	425.195	339.461	482.078	12.6705	68.401	0.0348128	0.157896	28.9205	28.8326	28.9495	28.8898	29.312	29.1209	28.7992	29.3002	28.935	9.5216	23
P0ADG6;P0ADG5;P0ADG4	Nus factor SuhB	suhB	0.234641	0.728019	0.34187	3883.98	4623.7	32.0652	31.9214	32.2792	32.1361	32.598	32.099	32.0912	32.5522	27	27	27	93.6	93.6	93.6	29.172	0	323.31	235510000000	818	3773.84	3412.29	4383.83	3965.95	5480.14	3864.29	3843.24	5307.12	404.64	891.884	0.104182	0.192894	32.2392	32.0954	32.4532	32.3101	32.772	32.273	32.2652	32.7262	32.2916	11.7599	91
P46853	Uncharacterized oxidoreductase YhhX	yhhX	0.234353	1.26846	0.248988	693.468	821.213	29.9425	30.1181	30.0592	30.0966	30.5434	30.2847	30.1737	30.1519	18	18	17	78.3	78.3	73.6	38.765	0	323.31	39902000000	240	640.646	724.427	695.17	713.629	975.747	814.088	753.195	741.822	37.2289	107.798	0.0536851	0.131266	29.7064	29.8819	29.823	29.8604	30.3073	30.0485	29.9375	29.9158	29.8988	9.62936	30
A7ZUC9;B7M6W7;Q0TAE8;P0A797;P0A796;C5A083;B7NU91;B7NFL3;B7N2Q7;B7MI48;B7LA13;B6I4Q8;B5YZ53;B1XB82;B1LNL9;B1IVG3;A8A720;B7UNN6;Q8FBD0	ATP-dependent 6-phosphofructokinase isozyme 1	pfkA	0.233953	1.54919	0.219911	5404.46	6360.07	32.7051	33.0042	32.7893	32.8219	33.2097	33.0627	32.9823	33.0016	19	19	19	70.9	70.9	70.9	34.842	0	323.31	232210000000	599	4936.94	6086.94	5236.55	5357.41	7028.73	6341.3	5994.36	6075.87	488.114	469.738	0.0903168	0.0738574	32.6229	32.922	32.7071	32.7396	33.1275	32.9805	32.9001	32.9194	32.9097	10.4273	65
P75809	5-amino-6-(5-phospho-D-ribitylamino)uracil phosphatase YbjI	ybjI	0.233677	0.572828	0.389025	115.101	135.616	26.856	27.424	26.9255	27.2401	27.262	27.4539	27.0117	27.6527	5	5	5	18.8	18.8	18.8	30.196	0	30.332	2277500000	49	94.9937	141.382	99.7263	124.301	126.227	144.372	105.933	165.932	21.7258	25.5929	0.188755	0.188716	26.9803	27.5482	27.0497	27.3643	27.3863	27.5781	27.1359	27.7769	27.3753	5	7
P28304	Quinone oxidoreductase 1	qorA	0.233488	1.07609	0.277321	233.199	276.323	28.2863	28.2737	28.4363	28.4306	28.7855	28.6333	28.2968	28.6453	13	13	13	56	56	56	35.172	0	164.69	13975000000	138	221.651	219.716	246.211	245.218	314.386	282.606	223.3	284.998	14.4789	38.1881	0.0620881	0.138201	28.1904	28.1779	28.3405	28.3347	28.6896	28.5374	28.201	28.5495	28.3376	9.40514	16
A1AHF5;B7NES6;Q8FCA0;Q1R4X2;Q0TBI8;P67911;P67910;C4ZXL1;B7ULH4;B7NPC7;B7N1S3;B7MFI2;B7M4A5;B7L745;B6I3J9;B5YWC0;B1X953;A7ZTH2;B1LK58;B1IZH2;A8A683	ADP-L-glycero-D-manno-heptose-6-epimerase	hldD	0.233018	0.916449	0.303035	2926.4	3480.9	31.8749	31.9408	31.9752	32.0452	32.4429	32.0225	31.9392	32.3636	20	20	20	64.8	64.8	64.8	34.894	0	323.31	284040000000	1125	2756.43	2886.69	2957	3105.47	4102.71	3056.5	2883.44	3880.94	145.451	601.042	0.0497033	0.172669	31.7905	31.8564	31.8908	31.9608	32.3585	31.9381	31.8548	32.2792	31.9145	12.2009	144
Q0TIU8;P69876;P69875;P69874;Q1RD28;A1AA20	Spermidine/putrescine import ATP-binding protein PotA	potA	0.232316	1.00744	0.290218	551.204	653.37	29.7819	29.8327	29.9014	29.9886	30.3196	30.2734	29.9578	29.883	17	17	17	53.4	53.4	53.4	43.028	0	323.31	51755000000	383	515.237	533.9	560.2	595.48	750.767	726.891	582.776	553.045	34.8061	99.9004	0.0631455	0.1529	29.3952	29.446	29.5147	29.6019	29.9329	29.8867	29.5711	29.4963	29.5429	9.04985	54
P0AEM2;P0AEM1;P0AEM0	FKBP-type 16 kDa peptidyl-prolyl cis-trans isomerase	fkpB	0.23137	0.498097	0.417037	1309.21	1567.75	29.7866	29.3925	29.7137	29.8419	30.358	29.9704	29.4467	29.8852	7	7	7	73.2	73.2	73.2	16.081	0	265.18	13728000000	107	1396.99	1060.15	1327.5	1452.19	2084.28	1588.8	1101.14	1496.8	173.702	404.148	0.132677	0.257788	30.8198	30.4258	30.7469	30.8752	31.3913	31.0036	30.4799	30.9184	30.8475	11.4435	13
Q8FJX7;Q1REP9;Q0TK13;P0A760;P0A759;C4ZWF4;B7UKV0;B7NMM9;B7N9S4;B7MPI3;B7MFT4;B7M5J6;B7L9L4;B6HYN6;B5YQM0;B1X6L1;B1LLC0;B1IY50;A7ZXT7;A7ZJ60;A1A8T7	Glucosamine-6-phosphate deaminase	nagB	0.230398	0.706308	0.353869	694.08	830.237	29.6698	29.6275	29.7527	29.6545	30.3215	29.8685	29.5622	29.874	10	10	10	50.8	50.8	50.8	29.788	0	266.32	31564000000	154	690.649	670.494	731.901	683.275	1089.98	793.697	640.498	796.776	26.5534	187.901	0.038257	0.226322	29.8137	29.7714	29.8966	29.7984	30.4654	30.0123	29.706	30.0178	29.8551	10.1561	19
Q8XAD2;P66948	Beta-barrel assembly-enhancing protease	bepA	0.23039	0.62406	0.377808	83.0382	99.7498	27.5591	27.4703	27.4767	27.4951	28.1616	27.7184	27.307	27.7358	10	10	9	33.9	33.9	30.2	53.934	0	118.65	6489300000	91	86.5013	81.2893	81.6509	82.7113	131.893	96.709	72.5022	97.8951	2.38628	24.4152	0.0287372	0.244764	26.8465	26.7577	26.7641	26.7825	27.449	27.0058	26.5943	27.0232	26.8145	7.12928	10
P0A9Q9;P0A9R0;Q8FCR6	Aspartate-semialdehyde dehydrogenase	asd	0.229993	0.621052	0.377952	792.689	948.922	30.4126	30.2359	30.187	30.3242	30.9157	30.5855	30.0957	30.4827	16	16	16	65.9	65.9	65.9	40.017	0	323.31	85069000000	358	862.188	761.888	736.208	810.471	1226.29	973.161	690.654	905.585	55.633	220.68	0.0701827	0.232559	30.1305	29.9539	29.9049	30.0422	30.6337	30.3035	29.8137	30.2007	30.0864	11.9103	35
A1AGW2;Q0TC30;P0A6V0;P0A6U9;P0A6U8;C4ZVX9;B7UKD4;B7NMJ4;B7NE39;B7N176;B7MDR4;B7M2J2;B7L4W1;B6I2Z5;B5YUI5;B1X774;B1LI90;B1IP35;A8A5N9;A7ZSW2;Q1R5J7	Glycogen synthase	glgA	0.228784	0.595095	0.388603	69.2882	81.9766	26.9406	27.307	27.1195	27.4331	27.8506	27.2187	27.2492	27.3968	13	13	13	32.7	32.7	32.7	52.822	0	102.76	8155500000	151	57.2902	74.0443	64.9377	80.8805	108.338	69.6087	71.1076	78.8519	10.3261	18.0351	0.149031	0.220003	26.258	26.6244	26.437	26.7505	27.168	26.5362	26.5666	26.7143	26.5955	8.31741	18
P77721	Uncharacterized HTH-type transcriptional regulator YdjF	ydjF	0.228033	0.70105	0.360657	239.554	281.263	27.8662	28.2064	27.8972	28.3055	28.6205	28.0909	28.2333	28.2428	11	11	11	61.1	61.1	61.1	28.261	0	145.94	7552900000	101	206.021	261.429	210.547	280.218	349.354	241.127	266.399	268.173	36.959	47.0447	0.154282	0.167262	28.086	28.4262	28.117	28.5253	28.8403	28.3107	28.4531	28.4626	28.4396	6.08746	10
Q8XDE9;Q0TBJ4;P37689;B1IZH8;A8A677;A7ZTG6;A1AHE9;Q8FCA6	2,3-bisphosphoglycerate-independent phosphoglycerate mutase	gpmI	0.227936	2.8318	0.173554	5081.7	5954.03	33.3174	33.4874	33.4923	33.4314	33.6396	33.6687	33.6653	33.6666	33	33	32	80.9	80.9	80.9	56.109	0	323.31	607750000000	1936	4683.99	5275.78	5293.91	5073.11	5869.07	5990.04	5975.84	5981.16	283.4	56.9409	0.0557688	0.00956342	32.5478	32.7177	32.7226	32.6618	32.8699	32.8991	32.8957	32.8969	32.7963	11.0112	219
A1AHF3;B7MFI0;Q8FCA2;Q1R4X4;Q0TBJ0;P07913;C4ZXK8;B7ULH2;B7NPC5;B7NES3;B7N1S0;B7M4A3;B7L742;B6I3J6;B1X950;B1LK55;B1IZH4;A8A681;A7ZTH0;B5YWB7;Q8XEJ1	L-threonine 3-dehydrogenase	tdh	0.227784	0.775188	0.342402	2323.71	2764.56	31.6909	31.7962	31.6407	31.7731	32.3543	31.9052	31.7001	31.8524	12	12	12	50.7	50.7	50.7	37.285	0	323.31	118220000000	353	2266.37	2439.73	2188.15	2400.6	3606.29	2633.3	2281.04	2537.62	116.957	580.529	0.0503321	0.209989	31.5109	31.6162	31.4607	31.5931	32.1743	31.7252	31.5201	31.6724	31.6046	11.2216	46
P64608;P64607;P64606	Intermembrane phospholipid transport system permease protein MlaE	mlaE	0.227524	0.637852	0.377357	425.609	505.98	28.8912	29.0187	28.6603	28.9337	29.5389	29.0853	28.9184	28.8714	9	9	9	38.1	38.1	38.1	27.863	0	155.98	10704000000	121	428.356	468.351	364.424	441.307	674.133	490.721	436.595	422.471	44.0619	115.897	0.103527	0.229054	29.1314	29.2589	28.9006	29.174	29.7791	29.3256	29.1587	29.1117	29.1663		15
B1XD24;C4ZRP7;P23893;B1LGV7;B7NIB7;B7M195;Q1RG34;Q0TLH7;B7UIK1;B7N823;B7MP16;B7MBD7;Q8X4V5;B7LGL6;Q8FL16;B5Z0D4;B1IQI6;A7ZWA2;A7ZHP6;A1A7K0;B6HZD0	Glutamate-1-semialdehyde 2,1-aminomutase	hemL	0.227064	1.78499	0.213667	1640.29	1929.35	31.5301	31.4799	31.5087	31.5293	31.9276	31.6055	31.701	31.7222	13	13	13	45.1	45.1	45.1	45.366	0	323.31	147760000000	388	1661.06	1603.61	1636.33	1660.14	2194.07	1751.01	1872.14	1900.2	26.9956	187.976	0.0164578	0.0974292	31.0671	31.0168	31.0457	31.0663	31.4646	31.1424	31.238	31.2592	31.1048	11.8861	47
P20099	Biotin sulfoxide reductase	bisC	0.226927	0.52256	0.413488	25.394	30.3355	26.3071	26.3477	26.6182	26.6143	26.8212	27.1214	26.5912	26.2612	14	14	14	24.3	24.3	24.3	85.85	0	62.852	3503900000	86	22.5114	23.1608	27.9903	27.9135	32.2642	39.8118	27.4661	21.8	2.96568	7.62908	0.116787	0.25149	24.9239	24.9645	25.235	25.2311	25.4379	25.7382	25.208	24.878	25.2195	3.80735	11
P0AEN3;P0AEN2;P0AEN1	NAD(P)H-flavin reductase	fre	0.226559	0.641712	0.377377	1431.61	1688.85	30.7957	30.5235	30.405	30.3451	31.1266	30.5246	30.5774	30.7469	12	12	11	63.1	63.1	55.8	26.242	0	141.72	47756000000	203	1726.61	1427	1313.38	1259.46	2176.76	1428.12	1481.92	1668.61	208.695	341.209	0.145776	0.202036	31.1224	30.8502	30.7317	30.6718	31.4533	30.8513	30.9041	31.0736	30.8777	10.3465	23
A7ZHZ9;A7ZWK3;B1J0Z4;B1LHT6;B1XDY3;B6I020;B7L3Z2;B7M269;C4ZT97;P24251;B7NK85;Q8FKM4;Q1RFT0;Q0TL76;B7UJC8;Q8X7N6;B7N8H1;B7MQ76;B7MC90;B5Z1I4;A1A7V1	Sigma factor-binding protein Crl	crl	0.225577	0.268607	0.563638	1284.25	1577.22	30.0028	29.2399	29.5519	29.6124	30.4796	29.762	29.0135	30.0541	8	8	8	41.4	41.4	41.4	15.656	0	60.182	15395000000	162	1669.84	978.84	1217.81	1270.51	2331.71	1410.82	835.353	1730.99	286.681	624.753	0.223229	0.396111	31.0746	30.3118	30.6238	30.6843	31.5515	30.8339	30.0854	31.126	30.7591	11.6448	26
Q46871	NADPH-dependent ferric-chelate reductase	yqjH	0.225466	0.616264	0.386579	209.653	249.411	27.8968	27.8626	27.8284	28.0859	28.3621	28.2819	27.6557	28.2757	8	8	8	41.7	41.7	41.7	28.871	0	54.751	6603100000	82	205.988	201.117	196.357	235.148	285.33	269.738	174	268.577	17.4459	50.8512	0.0832135	0.203885	28.0858	28.0516	28.0174	28.2749	28.5511	28.4709	27.8447	28.4647	28.1803	8.9571	12
B1X8N5;B5YT65;C4ZQ57;P18133;Q8XDE8;B7N398;B6I904;A7ZYN4;A7ZK22;B7M860;B7LE31;B7MHP0;B7MS49;B7UN17;Q8FJ98;B7NM43;B1LJT2	Nicotinate phosphoribosyltransferase	pncB	0.225345	0.857694	0.32923	278.775	330.44	29.0001	29.0733	28.9662	28.9482	29.5948	29.189	29.0166	29.0887	19	19	19	59	59	59	45.897	0	310.87	21570000000	261	279.233	293.919	272.683	269.265	423.463	318.713	282.485	297.099	10.9103	63.7759	0.0391366	0.193003	28.5203	28.5935	28.4864	28.4684	29.115	28.7092	28.5368	28.6089	28.5651	8.51175	32
P24230;B7UM74;Q8XD86	ATP-dependent DNA helicase RecG	recG	0.22522	0.848673	0.330217	80.1762	95.1321	27.991	27.914	27.9702	27.9379	28.5729	28.014	28.0526	28.0745	19	19	19	37.8	37.8	37.8	76.429	0	282.37	9356300000	172	82.3058	77.9844	81.1153	79.2993	123.695	83.6431	85.9314	87.2592	1.91398	19.1002	0.0238722	0.200775	26.7755	26.6985	26.7547	26.7223	27.3573	26.7985	26.8371	26.859	26.787	2.80735	16
P0AG77;P0AG76	Nuclease SbcCD subunit D	sbcD	0.224803	0.902698	0.318591	75.0438	88.4073	27.2396	27.0307	27.0954	26.9621	27.5057	27.0865	27.4916	27.1432	11	11	11	43	43	43	44.713	0	128.53	5766800000	102	83.5857	72.2084	75.5557	68.8255	100.704	75.0868	99.7116	78.1265	6.32279	13.6886	0.0842547	0.154836	26.7975	26.5886	26.6533	26.52	27.0636	26.6444	27.0495	26.7011	26.6772	3.80735	13
Q1R4U3;Q0TBG1;P60547;P60546;Q8XD88	Guanylate kinase	gmk	0.224607	0.751549	0.352983	1000.58	1180.74	30.0314	29.6667	29.8562	29.8738	30.4555	29.8959	29.9955	29.9796	13	13	13	68.6	68.6	68.6	23.592	0	323.31	42653000000	300	1125.94	872.188	995.929	1008.25	1515.18	1023.98	1097.96	1085.83	103.729	225.303	0.103669	0.190815	30.5117	30.147	30.3365	30.3541	30.9358	30.3762	30.4758	30.4599	30.4181	9.64205	34
P0ABS5;P0ABS6;Q8FDG5	DNA primase	dnaG	0.224349	0.558913	0.403244	62.5164	74.2766	27.2324	27.5694	27.2321	27.4448	27.9356	27.8097	27.4131	27.2176	19	19	19	40.1	40.1	40.1	65.564	0	83.8	9672000000	144	56.4975	71.5286	56.4833	65.5562	92.4343	84.6399	64.1172	55.9151	7.37306	17.1022	0.117938	0.230251	26.2381	26.575	26.2377	26.4505	26.9413	26.8154	26.4188	26.2233	26.4347	3.80735	18
A8A5H5;B1IP96;B1LHG9;B1X716;B7L4P2;C4ZUM4;P0AEA8;P0AEA9;B7NDX8;A7ZSP4;Q8FCW8;B7UK79;B7NMD7;B7M1S1;B5YTS6;B6I2S7;B7N1F1;Q0TC92;B7MCY5;A1AGQ2;Q1R5R3	Siroheme synthase	cysG	0.22379	0.750448	0.353832	152.817	181.039	28.2347	28.374	28.1394	28.2867	28.871	28.4352	28.2183	28.4055	19	19	19	51	51	51	49.951	0	323.31	18488000000	312	150.006	165.374	140.324	155.562	234.195	172.616	148.289	169.057	10.4751	37.0255	0.068547	0.204516	27.6328	27.7721	27.5375	27.6847	28.2691	27.8333	27.6163	27.8036	27.7284	5.32193	38
A7ZJM7;Q1REB2;Q0TJN6;P0ABT3;P0ABT2;C4ZXY4;B7UM08;B7NNP4;B7NAB2;B7MQR6;B7MGS0;B7M787;B7LC95;B6I7W9;B5YSA4;B1X7E2;B1LMA4;B1IXF6;A7ZY70;Q8FJM0	DNA protection during starvation protein	dps	0.223711	1.05703	0.296035	2849.71	3355.36	31.018	31.0797	30.9148	31.0699	31.4871	31.2464	30.983	31.2607	14	14	14	81.4	81.4	81.4	18.695	0	323.31	120180000000	406	2841.49	2967.06	2643.57	2946.71	3946.37	3334.37	2772.86	3367.83	148.031	479.303	0.0519462	0.142847	31.8339	31.8957	31.7308	31.8858	32.303	32.0624	31.799	32.0766	31.8908	13.3491	56
Q1R260;Q0T8T0;P0A6K8;P0A6K7;P0A6K6;C4ZT65;B7UR11;B7NW63;B7NH51;B7MTC9;B7MNJ0;B7LXU5;B7LEM9;B6I6N0;B5Z4R5;B1XFJ3;B1LEI8;B1IS36;A8A8B2;A7ZVS6;A1AJV0	Phosphopentomutase	deoB	0.223042	1.19539	0.280335	1757.63	2064.52	31.5635	31.6055	31.6699	31.472	32.0581	31.7818	31.6681	31.6952	31	31	31	89.9	89.9	89.9	44.392	0	323.31	175680000000	826	1737.99	1789.88	1872.46	1630.2	2457.19	2024.97	1870.07	1905.84	101.403	270.029	0.0576933	0.130795	31.1318	31.1738	31.2382	31.0403	31.6264	31.35	31.2364	31.2634	31.2373	12.5452	101
P0A9S2;P0A9S1	Lactaldehyde reductase	fucO	0.222592	0.487058	0.432515	97.0482	114.675	27.1573	27.5779	27.0601	27.3895	27.807	27.7822	27.0822	27.4038	8	8	8	27	27	27	40.513	0	152.79	5464100000	107	87.1707	117.024	81.4374	102.561	137.384	135.015	82.7073	103.592	16.0279	26.2943	0.165154	0.229295	26.8575	27.2782	26.7603	27.0897	27.5072	27.4824	26.7824	27.104	27.0969	7.87036	17
A7ZTR3;B7N212;Q8XB34;Q0TB00;P0A853;C4ZYY6;B7UMH5;B7NR10;B7NF25;B7MGC9;B7M560;B7L853;B6I3U1;B5YXB2;B1X9T7;B1IX30;A8A6H0;Q8FBV2;B1LL35	Tryptophanase	tnaA	0.222464	0.643082	0.382445	3803.88	4421.97	32.7491	33.2449	32.6614	32.9978	33.4305	32.9844	33.041	33.0871	30	30	30	76.6	76.6	76.6	52.773	0	323.31	555630000000	1133	3347.21	4736.36	3148	3983.96	5393.84	3946.65	4106.24	4241.15	716.628	659.002	0.188394	0.149029	32.0679	32.5637	31.9802	32.3166	32.7493	32.3032	32.3598	32.4059	32.3382	15.4376	149
Q7ADF8;P77247	Hexitol phosphatase B	hxpB	0.222024	0.885929	0.328548	552.638	645.364	29.1678	28.8009	29.2031	29.0316	29.4516	29.2181	29.0528	29.3691	11	11	11	54.1	54.1	54.1	24.329	0	160.83	16487000000	199	596.244	461.169	611.146	541.994	727.304	617.59	550.087	686.474	67.8344	78.0027	0.122747	0.120866	29.6038	29.2369	29.639	29.4675	29.8876	29.654	29.4887	29.805	29.6214	9.78953	28
P37749	Beta-1,6-galactofuranosyltransferase WbbI	wbbI	0.220818	0.812529	0.343703	1183.26	1396.43	30.8899	30.7188	30.71	30.7971	31.3324	31.0212	30.7107	30.9348	19	19	19	64.5	64.5	64.5	37.757	0	323.31	80643000000	448	1277.17	1133	1126	1196.87	1741.07	1400.1	1126.58	1317.96	70.2609	256.751	0.0593792	0.183863	30.6917	30.5207	30.5118	30.599	31.1343	30.823	30.5126	30.7367	30.6454	10.9858	60
P69925;P69924	Ribonucleoside-diphosphate reductase 1 subunit beta	nrdB	0.220815	1.2401	0.279919	1531.75	1797.27	31.3253	31.4454	31.3181	31.3245	31.8208	31.5629	31.3996	31.5133	17	17	17	52.1	52.1	52.1	43.517	0	323.31	142470000000	506	1500.96	1632.58	1493.35	1500.1	2123.43	1772.54	1581.04	1712.06	67.3087	231.667	0.0439424	0.1289	30.9224	31.0424	30.9151	30.9215	31.4179	31.1599	30.9966	31.1103	31.0195	9.70044	61
A7ZJQ2;B6I8F5;P0AEI5;P0AEI4;B7NNR8;B7M7B0;B7LCB8;B7NAI1;B5YSC6;B1X7X6;B1LMD0;B1IXD2;A7ZY97;Q1RE90;A1A974;B7MGU2;B7MQT8;Q0TJL3;Q8FJK5	Ribosomal protein uS12 methylthiotransferase RimO	rimO	0.220704	1.26779	0.276804	1106.18	1297.75	31.0032	31.0581	31.1271	31.1187	31.5459	31.2789	31.1391	31.2261	23	23	23	60.1	60.1	60.1	49.581	0	323.31	86121000000	405	1050.02	1091.12	1145.12	1138.46	1535.31	1273.52	1154.79	1227.37	44.4933	165.743	0.0402225	0.127716	30.412	30.4669	30.5359	30.5275	30.9547	30.6877	30.5479	30.6349	30.5419	9.66	49
A8A1W1;B1IYY4;B1LN92;B1X7I7;B7M477;B7NPN7;C4ZSI0;P0C8J6;B5YV43;Q8X4R2;B7L9W7;Q0TFZ6;B7NCC6;B7MEF1;A1ACW2;Q8FFY7;Q1R9X7;A7ZNR5;B7UFB3;P0C8J7	D-tagatose-1,6-bisphosphate aldolase subunit GatY	gatY	0.220642	2.36088	0.201364	4647.35	5420.8	32.379	32.5567	32.4186	32.4048	32.603	32.6814	32.6232	32.7341	15	15	15	56.3	56.3	56.3	30.812	0	323.31	365190000000	776	4448.58	5037.75	4573.61	4529.45	5203.73	5497.43	5278	5704.03	265.367	226.275	0.0571007	0.041742	32.4741	32.6518	32.5137	32.4999	32.6981	32.7765	32.7183	32.8292	32.6749	13.477	73
Q1R4J8;Q0TAX4;P0ABA5;P0ABA4;C4ZZ13;B7UMK0;B7NR37;B7NF51;B7MGF5;B7M591;B7L885;B6I3X2;B5YXD9;B1X9W3;B1LL62;B1IX03;A8A6J8;A7ZTU7	ATP synthase subunit delta	atpH	0.2205	0.498004	0.431047	10678.9	12680.2	33.0374	32.9636	33.1113	32.6807	33.6192	33.1445	32.7426	33.1687	9	9	1	59.3	59.3	8.5	19.332	0	323.31	131540000000	426	11295.1	10726.3	11894.7	8799.33	16974.3	12175.2	9188.62	12382.8	1340.77	3213.21	0.125554	0.253403	33.805	33.7312	33.8789	33.4483	34.3868	33.9121	33.5102	33.9363	33.8419	13.537	63
B1XBT4;C4ZYN1;P09372;B7M983;Q1R8B1;Q0TEM6;B7UH62;B7NSB2;B7N6J9;B7MYA6;B7MIV1;A7ZQ54;B1LPC1;B6I635;B5Z231;B1IVM0;A8A3C0;Q7ABI1;Q8FEY9;B7LDK2	Protein GrpE	grpE	0.219695	1.21597	0.283885	6653.91	7767.63	32.6106	32.361	32.4874	32.3439	32.8094	32.616	32.4921	32.764	14	14	13	64.5	64.5	60.9	21.798	0	323.31	188190000000	509	7420.65	6230.79	6807.34	6156.85	8528.8	7449.13	6830.21	8262.37	588.085	775.534	0.088382	0.0998418	33.205	32.9554	33.0817	32.9383	33.4038	33.2104	33.0865	33.3584	33.1457	14.0388	49
A1AHX9;B7MH75;Q1R4C3;P0A8P7;P0A8P6;C4ZZ74;B7UNC8;B7NTD1;B7NFB3;B7N2A1;B7M613;B7L968;B6I4F2;B1XAH7;B1LLY2;B1IW93;A8A6R9;A7ZU16;Q8X4T6;B5YY58;Q0TAR4	Tyrosine recombinase XerC	xerC	0.219533	0.676654	0.378195	196.279	233.132	28.09	28.0262	28.0405	28.0786	28.7087	28.2752	27.9777	28.1519	11	11	11	49.7	49.7	49.7	33.89	0	97.38	6277300000	108	200.574	191.812	193.746	198.985	309.312	228.34	185.405	209.468	4.1691	53.7408	0.0212407	0.230517	28.0477	27.9839	27.9982	28.0363	28.6664	28.2329	27.9354	28.1097	28.042	4	14
P0A864;P0A863;P0A862	Thiol peroxidase	tpx	0.218622	0.427209	0.470959	14789.2	17682.2	33.3407	33.0102	33.4318	33.4034	34.0659	33.3161	33.112	33.5666	7	7	7	78.6	78.6	78.6	17.835	0	323.31	270940000000	532	15152.3	12022.5	16150.1	15831.9	25176.4	14893.3	12910.2	17748.9	1890.84	5376.41	0.127853	0.304058	34.2246	33.8941	34.3157	34.2873	34.9498	34.2	33.9959	34.4505	34.2559	14.8187	68
P24182;Q8X9B6	Biotin carboxylase	accC	0.218405	1.57537	0.248873	2752.43	3218.33	32.3791	32.318	32.3739	32.4154	32.7044	32.4046	32.5473	32.7037	28	28	28	64.6	64.6	64.6	49.32	0	323.31	350230000000	939	2766.11	2650.24	2756.06	2837.3	3473.71	2815.94	3111.78	3471.88	77.1266	317.688	0.0280213	0.098712	31.7955	31.7344	31.7903	31.8318	32.1208	31.821	31.9637	32.1201	31.8264	12.3859	124
P0ACT8;P0ACT7;P0ACT6	HTH-type transcriptional regulator UidR	uidR	0.218051	1.02706	0.310588	275.436	322.692	27.9079	27.8858	27.8042	28.0194	28.2834	28.1449	27.8338	28.2273	8	8	8	48.5	48.5	48.5	21.799	0	126.56	6552100000	124	275.722	271.487	256.42	298.116	358.651	325.489	261.791	344.837	17.24	42.8178	0.0625916	0.13269	28.5022	28.4801	28.3985	28.6137	28.8778	28.7392	28.4281	28.8217	28.558	7.12928	16
P68398;Q8XA44;Q8FF24	tRNA-specific adenosine deaminase	tadA	0.217536	1.56602	0.249807	367.639	428.733	28.1314	28.2022	28.0152	28.0388	28.483	28.3254	28.2378	28.2117	7	7	7	51.5	51.5	51.5	18.717	0	85.09	7102000000	101	376.115	395.229	346.72	352.492	481.073	430.82	405.185	397.853	22.3616	37.6471	0.0608248	0.0878103	28.9457	29.0165	28.8295	28.853	29.2972	29.1396	29.052	29.0259	29.0212	3.80735	15
Q8XBJ4;P37440	Oxidoreductase UcpA	ucpA	0.216635	1.08313	0.30588	1272.5	1485.33	30.4737	30.566	30.2852	30.4396	30.8655	30.7087	30.4584	30.5985	13	13	13	65	65	65	27.832	0	323.31	51623000000	294	1298.66	1385.34	1138.03	1267.96	1708.5	1530.84	1284.76	1417.21	102.5	179.578	0.0805506	0.120901	30.7156	30.8079	30.527	30.6814	31.1073	30.9505	30.7002	30.8404	30.7617	10.9381	30
P28635;Q8X8V9	D-methionine-binding lipoprotein MetQ	metQ	0.216052	1.54268	0.254205	1524.21	1778	30.8011	30.8365	30.6927	30.7979	31.1461	31.0568	30.8239	30.9657	15	15	15	66.4	66.4	66.4	29.431	0	323.31	99559000000	422	1543.57	1582.33	1430.78	1540.16	1965.3	1846.2	1568.41	1732.11	65.1592	169.081	0.0427494	0.095096	30.9623	30.9978	30.854	30.9592	31.3073	31.218	30.9851	31.1269	30.9915	11.9506	55
P0A9L8	Pyrroline-5-carboxylate reductase	proC	0.215566	0.81515	0.354167	904.278	1055.95	30.0018	30.1536	29.9242	29.7873	30.378	30.0297	29.9661	30.3554	10	10	10	62.5	62.5	62.5	28.145	0	264.03	27953000000	162	922.777	1026.26	873.979	794.097	1200.85	940.986	899.973	1181.99	97.0907	157.508	0.107368	0.149163	30.2275	30.3793	30.1499	30.013	30.6037	30.2554	30.1918	30.5811	30.2415	9.66711	18
B1LP16;B7M404;P60664;C4ZSB4;B7UT62;B7MWU3;P60665;B7L9Q2;B6I896;B5YU81;B1X6W2;Q8FG48;A1ACN7;B1IZ49;B7MDH9;Q0TG62;Q1RA48;A7ZNJ7;A8A1P9;B7NQG5;B7NC65	Imidazole glycerol phosphate synthase subunit HisF	hisF	0.215547	0.489308	0.440436	193.183	231.45	27.8473	27.7319	27.8301	27.7228	28.5601	27.7344	27.7058	27.994	8	8	8	39.5	39.5	39.5	28.454	0	53.042	6229200000	99	201.924	186.246	199.5	185.064	332.587	186.575	182.878	223.76	8.76267	69.9066	0.0453593	0.302038	28.0573	27.9418	28.04	27.9328	28.77	27.9444	27.9158	28.2039	27.9922	7.49185	12
P0AGJ3;P0AGJ2	tRNA (guanosine(18)-2-O)-methyltransferase	trmH	0.215337	0.776294	0.36278	369.679	434.637	28.5456	28.6254	28.4305	28.5676	29.0285	28.8803	28.42	28.7017	9	9	9	52.4	52.4	52.4	25.343	0	95.906	7710300000	70	370.092	391.355	341.432	375.836	518.977	467.823	338.927	412.822	20.8631	77.1381	0.0564358	0.177477	28.9226	29.0024	28.8075	28.9446	29.4055	29.2573	28.797	29.0787	28.9735	6.12928	11
P0ACQ2;P0ACQ1;P0ACQ0	Ribose operon repressor	rbsR	0.215133	0.266995	0.57458	59.5524	63.5766	25.6999	26.3972	26.6127	26.3791	27.0703	25.8787	26.2356	26.765	7	7	7	26.7	26.7	26.7	36.612	0	20.903	1395000000	31		56.7119	65.9475	55.9977	90.8514	39.4461	50.6443	73.3647	5.54983	23.0163	0.0931925	0.362024		26.2435	26.459	26.2254	26.9166	25.725	26.0819	26.6112	26.2435		1
P08506	D-alanyl-D-alanine carboxypeptidase DacC	dacC	0.214599	0.674621	0.38665	598.357	703.742	30.0288	30.0627	29.8268	30.124	30.6257	30.1931	29.9981	30.0839	22	21	21	60	58.2	58.2	43.608	0	323.31	52023000000	332	604.249	618.737	524.559	645.884	917.7	677.9	591.379	627.989	52.1379	146.98	0.0871351	0.208855	29.6228	29.6566	29.4208	29.718	30.2197	29.7871	29.5921	29.6778	29.6672	9.90087	34
P37024	ATP-dependent RNA helicase HrpB	hrpB	0.214283	0.526118	0.429258	32.4819	38.5777	26.8795	26.8987	26.7831	26.9729	27.3002	27.3788	26.5655	27.1469	19	19	17	29.5	29.5	26.9	89.147	0	57.708	2853400000	77	32.3531	32.7926	30.2415	34.5405	43.4349	45.8938	25.968	39.0141	1.76731	8.8753	0.054409	0.230063	25.4419	25.4611	25.3455	25.5353	25.8626	25.9412	25.1279	25.7093	25.4982		15
P0AB24;Q8XAS6;Q8FJ35;Q1RDJ9;Q0TJ49;A1A9S2	Iron uptake system component EfeO	efeO	0.214243	0.548101	0.421785	221.901	261.024	28.7068	28.3642	28.599	28.353	29.0663	28.7443	28.2952	28.7742	16	16	16	57.9	57.9	57.9	41.137	0	187.72	15103000000	213	253.99	199.823	235.522	198.269	326.683	260.749	190.403	266.261	27.4539	55.7554	0.123722	0.213603	28.3849	28.0423	28.2771	28.0312	28.7444	28.4225	27.9734	28.4523	28.331	8.73471	26
P0ADV3;P0ADV2;P0ADV1	Lipopolysaccharide export system protein LptA	lptA	0.213823	2.26501	0.213698	1419.55	1649.37	30.2157	30.0938	30.0719	30.1472	30.4266	30.3404	30.242	30.3749	9	9	9	43.2	43.2	43.2	20.127	0	293.09	30701000000	154	1503.91	1380.91	1359.86	1433.51	1743.24	1641.15	1531.81	1681.28	64.2073	88.9155	0.0452308	0.0539088	30.9252	30.8033	30.7813	30.8567	31.1361	31.0499	30.9514	31.0844	30.9383	10.5469	21
P36649;Q8X947	Multicopper oxidase CueO	cueO	0.213751	0.61677	0.402043	117.318	137.571	28.2236	27.8514	28.1609	27.9856	28.6275	28.1688	27.9567	28.3235	14	14	13	45.9	45.9	44.6	56.556	0	194.74	10940000000	154	131.298	101.175	125.654	111.144	174.207	126.357	108.913	140.808	13.707	27.6871	0.116836	0.201256	27.4425	27.0703	27.3798	27.2045	27.8464	27.3877	27.1756	27.5424	27.3838	8.72792	17
Q8X7I0;Q8FG00;P76402	UPF0339 protein YegP	yegP	0.213643	0.650668	0.393217	190.37	222.77	26.6549	26.6384	26.2879	26.4417	27.0886	26.7158	26.4997	26.5733	4	4	4	44.5	44.5	44.5	11.967	0	33.036	2332300000	44	210.159	207.749	162.544	181.026	284.735	219.323	188.523	198.5	22.7685	43.2568	0.119601	0.194177	28.1144	28.0979	27.7474	27.9013	28.5481	28.1753	27.9592	28.0329	28.0654	7.36632	5
P0ADC7;P0ADC6	Lipopolysaccharide export system permease protein LptG	lptG	0.21327	0.620726	0.40179	403.08	475.977	29.4266	29.3053	29.202	29.3057	29.9401	29.5097	29.181	29.4619	9	9	9	34.7	34.7	34.7	39.618	0	183.97	10334000000	85	436.721	401.162	373.172	401.266	625.672	462.867	367.728	447.639	26.0328	108.169	0.0645847	0.227256	29.1591	29.0378	28.9345	29.0381	29.6726	29.2421	28.9135	29.1943	29.0986	7.30378	9
P16256	Sodium/pantothenate symporter	panF	0.211736	0.418192	0.48329	68.6933	81.6348	26.9078	27.3298	27.2576	27.1471	27.8609	27.4534	27.3047	26.8702	4	4	4	13.3	13.3	13.3	51.716	0	22.242	2820700000	29	57.2016	76.8634	73.0766	67.6318	111.488	83.8119	75.5245	55.715	8.54693	23.1308	0.124422	0.283345	26.2558	26.6778	26.6056	26.495	27.2089	26.8014	26.6527	26.2182	26.6291		4
P0AGB1;P0AGB0	Phosphoserine phosphatase	serB	0.211365	0.411103	0.485701	273.231	326.341	28.5814	28.5571	28.7541	28.4047	29.27	28.9428	28.2495	28.6805	11	11	11	46.3	46.3	46.3	35.042	0	177.83	10919000000	149	273.551	268.942	308.72	241.712	443.022	352.304	216.826	293.212	27.5161	95.5327	0.100706	0.292739	28.4909	28.4666	28.6637	28.3142	29.1795	28.8523	28.159	28.59	28.5405	7.81378	19
P75785	Phosphoethanolamine transferase OpgE	opgE	0.210927	0.685454	0.388943	33.4254	39.1516	26.2855	26.4988	26.3791	26.2112	26.7512	26.4133	26.2444	26.8093	6	6	6	15.4	15.4	15.4	59.705	0	22.85	2050500000	32	32.0008	37.1543	34.1679	30.3786	44.3385	34.9962	31.0933	46.1784	2.9308	7.26829	0.0876818	0.185645	25.4262	25.6395	25.5198	25.3519	25.892	25.554	25.3851	25.9501	25.5369		2
P0A9G7;P0A9G6	Isocitrate lyase	aceA	0.210847	0.547108	0.427605	2931.64	3464.39	32.5269	32.3424	32.2857	32.4661	33.0282	32.7596	32.2963	32.3804	20	20	20	49.3	49.3	49.3	47.521	0	323.31	134850000000	348	3185.09	2799.16	2690.1	3052.22	4524.18	3748.74	2710.17	2874.45	227.063	840.811	0.0774525	0.242701	31.9969	31.8125	31.7557	31.9361	32.4982	32.2297	31.7663	31.8504	31.8932	13.8996	43
P06709	Bifunctional ligase/repressor BirA	birA	0.210526	0.502626	0.443476	161.384	191.252	27.6716	27.9321	27.7886	27.9453	28.5691	27.9385	27.9294	27.7427	12	12	12	48	48	48	35.312	0	85.161	9342500000	146	143.56	172.278	155.815	173.882	269.11	173.053	171.959	150.887	14.4176	52.898	0.0893372	0.276587	27.57	27.8305	27.687	27.8437	28.4675	27.8369	27.8279	27.6411	27.8292	5.20945	21
P62577	Chloramphenicol acetyltransferase	cat	0.21042	0.453369	0.470008	53601.5	63493.1	35.4508	35.7504	35.6533	35.8017	36.207	35.7837	35.3648	36.1423	13	13	13	59.8	59.8	59.8	25.663	0	323.31	1642600000000	2641	45970.4	56695.8	52969.8	58770	78054	58034.8	43283.8	74599.7	5624.94	16058.1	0.10494	0.252911	35.8097	36.1093	36.0122	36.1606	36.5659	36.1426	35.7237	36.5012	36.1259		319
P0ACY2;P0ACY1	Putative NAD(P)H nitroreductase YdjA	ydjA	0.209737	0.893986	0.349275	1132.59	1321.46	29.888	29.6746	29.8127	29.8393	30.2925	29.9505	29.7662	30.0444	9	9	9	60.1	60.1	60.1	20.059	0	283.71	27399000000	187	1199.64	1033.2	1138.1	1159.43	1592.46	1253.31	1101.58	1338.5	71.0022	205.524	0.0626899	0.155528	30.6023	30.389	30.5271	30.5536	31.0069	30.6648	30.4805	30.7587	30.578	11.3009	29
Q93K97;P83843;P83842	ADP-ribose pyrophosphatase	nudF	0.209516	1.349	0.290446	442.285	513.351	28.7892	28.7413	28.6743	28.5932	28.9076	29.0319	28.7101	28.9865	13	13	13	70.8	70.8	70.8	23.667	0	171.49	13599000000	156	470.329	454.817	433.977	410.019	510.983	557.434	444.989	539.997	26.1638	49.4377	0.0591559	0.0963039	29.2649	29.2171	29.1501	29.069	29.3834	29.5076	29.1858	29.4622	29.241	7.48382	19
B1IUU6;B1XCR0;C4ZZN7;P23909;A8A3L2;B7LEE7;A7ZQH3;B5Z397;B7LXE0;Q9S6P8;B7N6W4;B6I6B9;B7NT79;Q8FEL3;B1LQ55;Q0TEC9;Q1R7W4;B7UHE9;A1AES5;B7MKK5;B7MYN6	DNA mismatch repair protein MutS	mutS	0.208628	1.47751	0.280085	159.191	184.739	29.2047	29.3228	29.1855	29.2855	29.6611	29.4139	29.3611	29.3969	38	38	38	59.1	59.1	59.1	95.246	0	323.31	58645000000	620	154.141	167.426	152.085	163.112	212.175	178.454	171.98	176.346	7.28447	18.4888	0.0457594	0.100081	27.6716	27.7897	27.6524	27.7524	28.128	27.8808	27.828	27.8638	27.8089	6.87036	72
P0A7A9;P0A7B0;Q8FAG0	Inorganic pyrophosphatase	ppa	0.207825	0.897062	0.35254	13402.6	15548	33.4728	33.1265	33.3111	33.3052	33.781	33.3661	33.4072	33.4927	19	19	19	92.6	92.6	92.6	19.703	0	323.31	446490000000	790	15029.5	11794.1	13420.8	13366.1	18649	13947.4	14354.7	15240.9	1321.1	2136.7	0.0985702	0.137426	34.213	33.8667	34.0513	34.0454	34.5211	34.1062	34.1474	34.2329	34.1268	13.8103	93
A1A7C7;B7M125;Q1RGB3;Q0TLQ7;P60391;P60390;C6UM45;C5W331;C4ZQ04;B7MAK5;B7N7V5;B7LFV2;B6HZ59;B5YZB8;B1XC59;B1LG19;B1IR96;A7ZW34;A7ZHH3;B7UID2;B7MNU1;B7NHI8;Q8FL68	Ribosomal RNA small subunit methyltransferase H	rsmH	0.207726	0.885346	0.353498	937.318	1093.59	30.3455	30.3403	30.4086	30.2343	30.8602	30.3835	30.3791	30.537	13	13	13	53	53	53	34.877	0	323.31	42788000000	195	945.199	941.771	987.894	874.407	1355.23	970.677	967.665	1080.77	46.8956	182.195	0.0500317	0.166603	30.2618	30.2566	30.3249	30.1506	30.7765	30.2998	30.2954	30.4533	30.2976	8.96	20
Q0TEV5;P0A6B9;P0A6B8;P0A6B7;C4ZXA5;B7UGX6;B7NRH9;B7N6B7;B7MYG3;B7MIM0;B7M7N3;B7LDC2;B6I5A2;B5Z104;B1XB05;B1LNI6;B1IWD1;A8A336;A7ZPX4	Cysteine desulfurase IscS	iscS	0.206823	0.851587	0.362245	4181.17	4871.7	32.769	32.9241	32.7433	32.9133	33.3715	32.9165	32.8803	33.0087	24	24	24	61.1	61.1	61.1	45.089	0	323.31	377740000000	1040	3979.11	4435.49	3908.07	4402.01	6067.2	4411.98	4301.56	4706.05	276.2	815.08	0.0660581	0.167309	32.3148	32.4699	32.2891	32.4591	32.9173	32.4623	32.4261	32.5545	32.4607	13.639	133
P0A8Y3	Alpha-D-glucose 1-phosphate phosphatase YihX	yihX	0.206792	0.784347	0.375628	572.612	667.118	28.9218	29.1661	28.949	28.9987	29.4928	29.2438	29.2122	28.9141	9	9	9	43.2	43.2	43.2	22.732	0	73.807	19475000000	201	537.523	637.809	547.85	567.265	801.712	673.435	658.699	534.629	45.1797	109.209	0.0789011	0.163702	29.4557	29.7	29.4829	29.5326	30.0267	29.7776	29.746	29.448	29.6163	8.37069	27
P22524;Q8XDG1;Q8FJA3	Chromosome partition protein MukE	mukE	0.206577	0.764249	0.378353	928.481	1078.19	30.0839	29.8863	30.0471	29.7562	30.4398	30.1958	30.0128	29.9514	12	12	12	67.9	67.9	67.9	26.974	0	323.31	37820000000	202	1020.19	888.397	994.291	811.044	1308.88	1103.35	970.671	929.859	96.8508	170.699	0.104311	0.15832	30.3709	30.1733	30.3342	30.0432	30.7268	30.4828	30.2998	30.2385	30.317	9.41574	25
P28904	Trehalose-6-phosphate hydrolase	treC	0.206526	0.566845	0.427443	1239.01	1458.87	31.6242	31.6756	31.4832	31.6268	32.2117	31.8237	31.4023	31.7981	33	33	33	66.8	66.8	66.8	63.837	0	323.31	238710000000	1100	1256.44	1302.5	1138.37	1258.71	1895.79	1444.84	1075.69	1419.16	70.3587	336.405	0.0567864	0.230593	30.6684	30.7198	30.5274	30.671	31.2559	30.8679	30.4465	30.8423	30.6954	8.91886	158
Q1RD19;Q0TIT9;P0AEI8;P0AEI7;P0AEI6;B1XA44;B1LI09;B1IUD3;A7ZZ89;A7ZKS4;A1AA28	Phosphatase NudJ	nudJ	0.205985	0.418984	0.487838	296.004	347.601	27.623	27.518	28.0109	27.537	28.4094	27.7746	27.5493	27.7796	7	7	7	63.4	63.4	63.4	17.433	0	116.07	7722800000	111	283.063	263.013	371.4	266.539	490.93	314.772	268.833	315.867	51.0182	98.0348	0.172356	0.282033	28.5397	28.4348	28.9277	28.4538	29.3262	28.6914	28.4661	28.6963	28.6156	4.9542	9
P0ADA6;P0ADA5	Uncharacterized lipoprotein YajG	yajG	0.20585	0.478038	0.464234	5789.6	6867.46	32.156	32.133	32.2113	32.2899	32.8799	32.524	32.2133	31.9963	6	6	6	52.1	52.1	52.1	20.95	0	323.31	118600000000	266	5618.45	5528.82	5840.42	6170.7	9327.2	7269.67	5848.72	5024.26	285.845	1883.91	0.0493722	0.274324	32.8076	32.7846	32.8629	32.9415	33.5316	33.1756	32.865	32.648	32.864	12.6952	40
P0AFK4	Spermidine/putrescine transport system permease protein PotB	potB	0.205252	0.436632	0.482871	217.317	258.131	27.9226	28.1561	28.1185	28.1066	28.7846	28.2514	27.7899	28.2989	5	5	5	15.3	15.3	15.3	31.062	0	18.17	4789100000	64	194.812	229.414	223.442	221.598	356.223	245.239	177.525	253.535	15.3693	73.7263	0.0707229	0.285616	28.0061	28.2396	28.2019	28.1901	28.8681	28.3349	27.8734	28.3824	28.2208		10
P0AEF2;P0AEF1;P0AEF0	DNA replication protein DnaC	dnaC	0.204184	0.618339	0.415997	120.905	138.777	26.7058	27.1019	27.2718	27.2089	27.2978	27.2679	27.0449	27.4945	6	6	5	27.3	27.3	20.8	27.935	0	34.852	2811300000	60	92.5055	122.067	137.484	131.564	140.013	137.116	117.291	160.686	19.9697	17.7571	0.165168	0.127954	26.9424	27.3384	27.5083	27.4454	27.5343	27.5045	27.2814	27.731	27.4749	6.04439	6
A1AHR4;Q1R4K2;Q0TAX7;P0ABB6;P0ABB5;P0ABB4;C4ZZ10;B7UMJ7;B7NR34;B7NF48;B7N2H1;B7MGF2;B7M588;B7L882;B6I3W9;B5YXD6;B1X9W0;B1LL59;B1IX06;A7ZTU4;A8A6J5	ATP synthase subunit beta	atpD	0.204077	1.21534	0.314598	6930.35	8033.25	33.766	33.7025	33.656	33.7528	34.1108	33.8907	33.7073	33.985	32	32	32	88.3	88.3	88.3	50.325	0	323.31	1721000000000	4351	7157.3	6846.1	6626.48	7091.5	9111.17	7809.9	6868.86	8343.06	242.836	942.263	0.0350395	0.117295	33.1534	33.0899	33.0433	33.1402	33.4981	33.278	33.0946	33.3723	33.1468	15.3724	555
P77596	D-xylonate dehydratase YagF	yagF	0.203918	0.465995	0.473386	48.7382	57.7842	27.1198	27.1857	27.0697	27.0339	27.7881	27.1052	26.8977	27.4337	6	6	6	12.8	12.8	12.8	69.398	0	26.263	3022700000	62	49.3012	51.627	47.6011	46.4235	78.7173	48.7991	42.2007	61.4197	2.2593	16.0726	0.0463557	0.278149	26.0435	26.1093	25.9934	25.9576	26.7118	26.0289	25.8214	26.3574	26.0362		9
P08660	Lysine-sensitive aspartokinase 3	lysC	0.203907	0.470555	0.471647	111.652	130.978	27.9676	27.5353	27.8098	27.7392	28.4145	27.8278	27.5919	28.0334	12	12	12	35.2	35.2	35.2	48.531	0	117.18	7934700000	117	128.101	94.6412	114.699	109.166	175.157	116.152	98.4656	134.136	13.8491	32.8565	0.124038	0.250855	27.4073	26.9749	27.2495	27.1789	27.8542	27.2675	27.0315	27.4731	27.2585	8.5812	20
P10384;Q8XCN6	Long-chain fatty acid transport protein	fadL	0.203306	0.69373	0.39767	1059	1229.78	31.1814	30.8539	30.9332	30.9494	31.3636	31.1162	30.862	31.3893	20	20	20	71.7	71.7	71.7	48.541	0	323.31	110540000000	571	1215.26	966.27	1021.41	1033.08	1380.66	1161.03	971.752	1405.7	108.168	204.137	0.102142	0.165994	30.6208	30.2933	30.3726	30.3888	30.803	30.5556	30.3014	30.8287	30.4722	11.6243	78
P64449;P64448	Uncharacterized protein YnbE	ynbE	0.202919	0.459512	0.478924	496.328	570.885	26.6779	27.2754	27.306	26.9518	27.6501	27.1445	27.078	27.1503	4	4	3	32.8	32.8	32.8	6.8401	0	7.0012	1915700000	27	375.773	570.979	583.336	455.225	742.232	520.979	497.254	523.073	98.9377	114.83	0.199339	0.201145	28.9444	29.5419	29.5725	29.2183	29.9166	29.411	29.3445	29.4168	29.4139	6.70044	8
P0A9T2;P0A9T1;P0A9T0	D-3-phosphoglycerate dehydrogenase	serA	0.201972	0.250711	0.600687	239.322	299.357	28.6016	28.7416	28.905	28.63	29.8838	28.5805	28.5656	28.6563	11	11	11	36.3	36.3	36.3	44.175	0	171.17	14405000000	168	219.57	242.189	271.546	223.981	538.834	216.347	214.109	228.137	23.6085	159.77	0.0986474	0.533711	28.177	28.317	28.4804	28.2054	29.4592	28.1558	28.141	28.2316	28.2185	9.82972	24
P0ACL0	Glycerol-3-phosphate regulon repressor	glpR	0.201793	0.860547	0.370961	634.72	736.676	29.5405	29.4909	29.3411	29.4696	29.9453	29.6873	29.416	29.6006	9	9	9	52	52	52	28.048	0	323.31	27321000000	217	670.377	647.532	583.05	637.92	890.072	742.997	614.441	699.192	37.0388	115.349	0.0583546	0.156581	29.7711	29.7216	29.5718	29.7003	30.176	29.918	29.6467	29.8313	29.7464	7.17991	29
P07862;Q8X9Y6;Q8FL63	D-alanine--D-alanine ligase B	ddlB	0.200998	0.562162	0.436788	658.728	771.418	29.6774	29.7304	29.6916	29.8645	30.2882	29.9584	29.5088	30.0125	14	14	14	63.4	63.4	63.4	32.839	0	323.31	43069000000	274	629.204	653	635.473	717.236	964.985	765.979	559.13	795.577	40.284	166.481	0.0611542	0.215811	29.6806	29.7336	29.6948	29.8676	30.2914	29.9615	29.512	30.0157	29.8006	9.83289	33
P27248;C5A0H7;B7LYG9;B7LF91;B6I738;B1IT97;A8A446;A7ZR14;Q1R7C6;B7UHV3;B7NHW6;B7N7E8;B7MZ57;B7MM91;B1LDA5;Q8FE65	Aminomethyltransferase	gcvT	0.200809	0.452741	0.482819	936.586	1107.45	30.4652	30.5618	30.6338	30.4741	31.2222	30.6673	30.2724	30.7763	16	16	4	57.1	57.1	14.6	40.146	0	323.31	52295000000	310	891.65	954.069	1003.39	897.236	1514.9	1027.18	779.074	1108.62	52.7134	305.665	0.0562825	0.276009	30.1785	30.2752	30.3472	30.1874	30.9356	30.3806	29.9858	30.4896	30.3112	11.1026	40
Q1RCQ9;Q0TII8;P0A8V8;P0A8V7;P0A8V6;C4ZTM8;B7UQ71;B7NJF3;B7N3Z1;B7MTW5;B7MK84;B7LXA1;B7LGU7;B6I9P8;B5YXL1;B1XA74;B1LHY0;B1IUA5;A7ZZC1;A7ZKV8;A1AAB0	Fatty acid metabolism regulator protein	fadR	0.20071	0.518374	0.453004	741.805	872.379	29.6626	29.5872	29.7204	29.5364	30.2972	29.7779	29.4593	29.775	17	17	17	84.9	84.9	84.9	26.968	0	323.31	38731000000	343	759.805	720.724	791.167	695.526	1184.85	823.68	658.994	821.997	42.2168	222.17	0.0569109	0.254672	29.95	29.8746	30.0078	29.8237	30.5846	30.0653	29.7467	30.0624	29.9789	8.74147	36
P39831;Q8X505;Q8FHD2	NADP-dependent 3-hydroxy acid dehydrogenase YdfG	ydfG	0.200306	0.467399	0.479204	2240.57	2647.16	31.124	31.328	31.1675	31.2604	31.9791	31.1598	31.2629	31.2792	10	10	10	44.8	44.8	44.8	27.249	0	323.31	59890000000	229	2091.72	2412.83	2156.47	2301.28	3806.56	2144.9	2305.34	2331.84	144.443	777.331	0.0644668	0.293647	31.3964	31.6003	31.4399	31.5327	32.2515	31.4322	31.5353	31.5516	31.534	11.0341	28
P76270	Free methionine-R-sulfoxide reductase	msrC	0.200215	0.668356	0.409638	603.466	690.111	28.8469	28.4457	29.0103	28.6767	28.9013	29.1331	28.7565	28.9896	8	8	7	48.5	48.5	48.5	18.121	0	86.728	7794900000	82	641.301	484.253	719.056	569.254	666.222	783.57	601.961	708.69	100.291	76.2037	0.166191	0.110422	29.7078	29.3066	29.8713	29.5376	29.7623	29.994	29.6174	29.8505	29.735	10.2046	12
P00887;Q8FH32;Q8X5W4	Phospho-2-dehydro-3-deoxyheptonate aldolase, Trp-sensitive	aroH	0.200187	0.985287	0.353906	186.568	215.23	28.025	28.2873	28.2495	28.1411	28.421	28.4176	28.1309	28.5341	11	11	11	37.6	37.6	37.6	38.735	0	210.29	10909000000	177	167.457	201.216	195.961	181.638	220.961	220.439	180.349	239.17	15.1912	24.8312	0.0814244	0.115371	27.79	28.0523	28.0145	27.9061	28.186	28.1826	27.8959	28.2991	28.0334	7.45121	19
P65871;P65870	6-carboxy-5,6,7,8-tetrahydropterin synthase	queD	0.200027	0.700466	0.402189	1536.67	1777.41	29.9061	29.5421	29.627	29.6956	30.2162	29.8806	29.6868	29.7875	10	10	10	87.6	87.6	87.6	13.773	0	186.58	33358000000	214	1776.26	1376.65	1460.92	1532.83	2206.87	1744.74	1523.36	1634.66	172.008	300.235	0.111936	0.168917	31.1629	30.7989	30.8837	30.9524	31.4729	31.1373	30.9435	31.0442	30.9983	9.21189	33
Q8FD98;Q1R6J2;Q0TCW0;P66818;P66817;C4ZSP0;B7UJ45;B7NKL8;B7NDD3;B7N0T4;B7MB70;B7M057;B7LH87;B6I1M4;B5YS39;B1XGW1;B1LFQ0;B1IQX2;A8A4W5;A7ZS45;A1AG54	DnaA initiator-associating protein DiaA	diaA	0.199934	0.485432	0.471163	410.991	482.876	28.2749	28.3861	28.4754	28.5683	28.5978	29.1244	28.477	28.3053	5	5	5	32.7	32.7	32.7	21.09	0	235.13	10353000000	118	368.63	398.472	424.178	452.682	462.116	668.174	424.662	376.553	35.8849	128.4	0.0873133	0.265907	28.917	29.0282	29.1174	29.2103	29.2398	29.7664	29.1191	28.9473	29.1183	8.15482	21
P33650;Q8FCT7;Q8XED4	Fe(2+) transporter FeoB	feoB	0.199322	0.912614	0.367351	52.4196	60.7927	27.4313	27.5403	27.4896	27.5007	28.0054	27.5091	27.6267	27.6179	14	14	14	27.6	27.6	27.6	84.473	0	172.04	8450400000	125	50.2719	54.2602	52.3682	52.7779	75.1452	53.0896	57.6451	57.291	1.64634	9.78949	0.031407	0.161031	26.0714	26.1804	26.1297	26.1408	26.6455	26.1492	26.2668	26.258	26.1648	3.58496	17
P0A9A4;P0A9A3;P0A9A2	Bacterial non-heme ferritin-like protein	ftnB	0.198271	0.175459	0.67873	115.158	171.861	26.0586	26.6644	26.1987	26.7708	27.4658	26.9958	26.435	25.5889	6	6	6	41.3	41.3	41.3	18.894	0	52.028	2135400000	39	87.2757	133.384	96.2713	143.7	233.764	168.223	113.596		27.5737	60.1666	0.239443	0.350088	26.8592	27.465	26.9993	27.5714	28.2664	27.7965	27.2357		27.465	2	6
P0AEJ3;P0AEJ2	Isochorismate synthase EntC	entC	0.198177	0.762536	0.392718	125.714	145.523	27.7367	27.6479	27.7401	27.9172	28.2644	27.8029	27.7619	28.0056	16	16	15	58.8	58.8	56.5	42.931	0	305.69	10954000000	205	123.346	115.907	123.642	139.963	178.47	129.191	125.542	148.89	10.1508	24.2406	0.0807449	0.166575	27.3533	27.2645	27.3567	27.5338	27.8809	27.4194	27.3785	27.6221	27.399	5.83289	24
P15034	Xaa-Pro aminopeptidase	pepP	0.198112	1.38143	0.311106	693.828	799.101	30.3932	30.5178	30.396	30.361	30.7396	30.4815	30.5127	30.7265	19	19	19	57.6	57.6	57.6	49.815	0	323.31	65972000000	364	681.746	743.892	683.113	666.562	868.927	725.275	741.256	860.945	34.2082	76.369	0.0493036	0.0955687	29.7952	29.9198	29.798	29.763	30.1417	29.8836	29.9147	30.1285	29.8991	9.9263	44
P21169	Constitutive ornithine decarboxylase	speC	0.19703	0.656701	0.417137	30.958	35.703	26.4527	26.7369	26.8295	26.5489	27.1509	26.7001	26.6324	26.8726	12	12	10	23.3	23.3	18.3	79.415	0	69.256	3778800000	78	26.9678	32.9053	35.1113	28.8478	43.9716	32.0703	30.585	36.1849	3.71557	5.99978	0.120019	0.168047	25.1818	25.466	25.5587	25.2781	25.8801	25.4293	25.3616	25.6017	25.4477	5.88264	7
Q8X574;P0A8P9;P0A8P8	Tyrosine recombinase XerD	xerD	0.196948	0.411647	0.504036	106.88	125.357	27.224	27.3245	27.3014	26.936	27.8772	27.4468	26.9526	27.297	11	11	10	49.7	49.7	45.6	34.212	0	39.77	5649900000	98	108.343	116.242	114.377	88.5572	171.169	126.635	89.595	114.028	12.6718	34.1936	0.118561	0.272771	27.1681	27.2686	27.2455	26.8801	27.8213	27.3909	26.8967	27.2411	27.2433	4.85798	8
P0AEK1;P0AEK0	Exodeoxyribonuclease 10	exoX	0.196391	0.241618	0.61581	129.336	160.805	26.997	27.1531	26.9847	26.9861	28.0641	26.6865	26.726	27.4298	4	4	4	29.5	29.5	29.5	25.133	0	16.282	2506700000	24	126.204	140.775	125.12	125.243	266.414	101.541	104.391	170.875	7.64157	77.3508	0.0590833	0.481021	27.386	27.5421	27.3737	27.3751	28.4532	27.0755	27.115	27.8188	27.3806	5.32193	3
P27298	Oligopeptidase A	prlC	0.194998	0.696086	0.412708	821.275	951.69	31.4051	31.3105	31.1891	31.2482	31.8422	31.4379	31.2371	31.4157	40	40	40	65.6	65.6	65.6	77.166	0	323.31	200060000000	984	889.916	832.848	765.02	797.317	1208.49	910.589	791.128	896.551	53.4917	179.309	0.0651325	0.188412	30.1758	30.0811	29.9598	30.0188	30.6128	30.2085	30.0077	30.1864	30.1284	11.4019	120
A1AGC9;B7UJW8;Q1R6A3;Q0TCN0;P61891;P61890;P61889;C4ZSX4;B7N0M1;B7MBZ7;B5YSW2;B1XHK9;A8A545;A7ZSD0;B1IQP3;B6I1V4;B7LHU4;B7M0U8	Malate dehydrogenase	mdh	0.193561	0.788063	0.394945	3499.23	4020.14	32.194	32.1013	31.8912	32.2147	32.5818	32.2276	32.1689	32.1971	21	21	3	84	84	7.4	32.337	0	323.31	272250000000	640	3721.78	3488.01	3010.96	3776.19	4882.83	3810.56	3657.12	3730.05	348.695	578.533	0.099649	0.143909	32.2194	32.1267	31.9167	32.2401	32.6072	32.253	32.1943	32.2225	32.2209	16.1588	94
P0AG72;P0AG71	DNA recombination protein RmuC	rmuC	0.192615	0.463015	0.487468	23.3925	26.915	25.5742	25.8198	25.9595	25.4426	26.2058	25.8846	25.9757	25.5004	12	12	11	31.6	31.6	29.5	54.764	0	184.48	1854500000	64	21.2216	25.2026	27.7926	19.3533	33.0239	26.3733	28.1107	20.152	3.81512	5.316	0.163091	0.197511	24.8396	25.0851	25.2249	24.708	25.4712	25.15	25.2411	24.7657	25.1176	2.80735	8
P0A871;P0A870;Q8FLD1;K0BE10	Transaldolase B	talB	0.191542	0.802318	0.395973	8661.04	9984.28	33.5669	33.4411	33.6175	33.4609	34.032	33.6148	33.5257	33.6802	27	27	25	85.8	85.8	75.4	35.219	0	323.31	758470000000	1412	8928.6	8175.54	9250.46	8289.55	12364.8	9232.73	8674.24	9665.32	514.046	1638.07	0.0593515	0.164065	33.4692	33.3433	33.5198	33.3631	33.9342	33.517	33.4279	33.5824	33.4931	13.9486	170
P10903	Nitrate/nitrite antiporter NarK	narK	0.191382	0.295005	0.57716	941.63	1100.6	31.0168	31.0104	30.3898	30.8994	31.546	31.1715	30.4709	30.8935	6	6	6	19.7	19.7	19.7	49.693	0	96.773	20231000000	52	1057.66	1052.89	681.823	974.15	1531.96	1178.63	721.683	970.12	177.387	342.91	0.188383	0.311567	30.4224	30.4159	29.7953	30.3049	30.9516	30.5771	29.8765	30.299	30.3604		6
A1AHS0;B7MGG0;Q1R4J2;Q0TAW9;P0A6U7;P0A6U6;P0A6U5;C4ZZ18;B7UMK5;B7N2H9;B7M596;B7L890;B6I3X7;B5YXE4;B1X9W8;B1IWZ8;A8A6K3;B7NF56;B1LL67;B7NR42	Ribosomal RNA small subunit methyltransferase G	rsmG	0.190961	1.83769	0.294502	501.138	572.86	28.7769	28.8991	28.9547	28.8244	28.9941	29.1708	29.0441	29.0099	14	14	14	86	86	86	23.431	0	208.98	25276000000	213	471.018	513.116	533.466	486.952	548.403	620.629	567.933	554.476	27.6711	32.8748	0.0552164	0.0573872	29.267	29.3893	29.4449	29.3146	29.4843	29.661	29.5343	29.5	29.4646	9.48382	21
P0A963;P0A962	L-asparaginase 1	ansA	0.190855	0.786573	0.401799	551.04	636.487	29.6359	29.6771	29.6645	29.6822	30.1478	29.594	29.7462	29.9351	9	9	9	42.9	42.9	42.9	37.127	0	323.31	25150000000	184	539.91	555.7	550.835	557.715	772.658	524.309	583.25	665.732	7.96199	107.728	0.014449	0.169254	29.462	29.5032	29.4906	29.5084	29.9739	29.4201	29.5723	29.7612	29.5058	9.29921	22
A7ZKK1;A7ZZ55;B1IUG7;B1XA08;B6I9H5;B7LG31;B7LX32;C4ZS38;P0A720;B7UPB4;B7NAX6;Q0TIX6;Q1RD57;Q8FIN9;B1LI47;B7MTM8;B7NKI2;B5YVW6;Q8X8H6;A1A9Z2;B7MJ85	Thymidylate kinase	tmk	0.189721	0.750796	0.410309	562.356	648.737	29.1205	29.0137	28.9815	29.0861	29.5602	29.2635	28.9945	29.1424	16	16	16	81.7	81.7	81.7	23.783	0	295.77	24865000000	269	590.18	547.643	535.461	576.139	802.93	652.347	540.357	599.316	25.1924	112.513	0.0447979	0.173434	29.5892	29.4823	29.4502	29.5548	30.0288	29.7322	29.4632	29.6111	29.572	8.08215	31
B1XEJ0;C5A0H5;P33195;B1IT99;B1LDA3;B7LF89;B6I736;B7N7E6;B7NHW4;B7LYG7;A7ZR12;A8A444;Q8FE67;B5YQ95;Q8XD33;B7MZ55;B7UHV1;B7MM89;Q1R7C8;A1AF92;Q0TDU9	Glycine dehydrogenase (decarboxylating)	gcvP	0.189196	0.440906	0.502737	282.249	329.428	30.3149	30.2723	30.0242	30.1745	30.8875	30.3896	30.0541	30.2115	40	40	39	60.9	60.9	59.7	104.38	0	323.31	96373000000	581	305.734	296.741	249.42	277.1	456.501	322.129	254.706	284.376	24.9385	89.0954	0.0883565	0.270455	28.6498	28.6071	28.359	28.5093	29.2223	28.7244	28.389	28.5463	28.5767	10.0647	73
P0C0S2;P0C0S1	Small-conductance mechanosensitive channel	mscS	0.188407	0.657868	0.432619	1470.69	1689.09	30.9996	30.7809	30.6931	30.7135	31.1978	31.1816	30.7637	30.7977	10	10	10	39.2	39.2	39.2	30.896	0	279.35	40552000000	221	1688.82	1449.04	1362.66	1382.24	1940.24	1918.28	1431.66	1466.17	150.045	277.828	0.102024	0.164484	31.0908	30.8721	30.7843	30.8047	31.289	31.2727	30.8548	30.8889	30.8805	11.7482	24
P0A960;P0A959	Glutamate-pyruvate aminotransferase AlaA	alaA	0.188081	0.631229	0.438921	155.892	180.019	28.2815	28.1079	28.0855	28.1391	28.6961	28.3767	28.057	28.2364	18	18	17	57.8	57.8	57.5	45.517	0	217.77	19032000000	248	170.26	150.774	148.426	154.107	227.601	182.003	145.5	164.974	9.8585	35.0522	0.0632393	0.194713	27.8137	27.6401	27.6177	27.6713	28.2283	27.9089	27.5892	27.7686	27.72	6.71425	26
A7ZIN4;B7NIF6;Q8FK84;Q0TKG7;P69442;P69441;C4ZUS8;B7UKF4;B7N927;B7MQI9;B7L799;B6I0C6;B1XFR1;B1LJN2;B1IZC0;A7ZXD2;B7MDZ6;B7M3W6	Adenylate kinase	adk	0.187013	0.764189	0.413173	6248.83	7143.59	32.6198	32.27	32.5266	32.4764	32.6888	32.5325	32.5012	32.9183	17	17	17	75.2	75.2	75.2	23.586	0	323.31	254960000000	727	6896.86	5398.98	6461.27	6238.21	7238.63	6487.97	6347.34	8500.43	629.134	985.544	0.10068	0.137962	33.1004	32.7507	33.0072	32.9571	33.1695	33.0131	32.9818	33.399	33.0102	13.0012	82
P05041	Aminodeoxychorismate synthase component 1	pabB	0.186955	0.389323	0.525254	82.0516	95.9481	27.493	27.4959	27.3456	27.2597	27.9542	27.7489	27.0149	27.6242	11	11	11	39.3	39.3	39.3	50.969	0	101.98	5367700000	88	87.4464	87.6241	78.8701	74.266	120.768	104.599	62.5673	95.8576	6.60539	24.5299	0.0805028	0.255659	26.862	26.8649	26.7146	26.6287	27.3231	27.1178	26.3839	26.9932	26.8635	5.49185	10
P64625;P64624	Uncharacterized protein YheO	yheO	0.18669	0.338722	0.556676	539.444	629.702	28.9941	29.4611	28.9916	29.1623	29.9114	29.2716	29.2602	28.9126	7	7	7	34.2	34.2	34.2	26.82	0	261.82	13273000000	104	478.436	663.475	477.623	538.242	909.417	581.053	576.425	451.913	87.4244	195.835	0.162064	0.310997	29.2894	29.7564	29.2869	29.4576	30.2067	29.5669	29.5555	29.2079	29.5065	9.43879	16
B1IRE5;B1XBF6;B7N7Q5;C4ZPV7;P04036;P58209;B6HYX9;A7ZVX9;A7ZHC0;Q8FLB4;Q1RGH0;Q0TLW0;B7M0C7;B7UI76;B7L4F3;B7MNN7;B7MAF2;B5YYC3;B1LFW1;A1A780;B7NHD5	4-hydroxy-tetrahydrodipicolinate reductase	dapB	0.185756	0.895854	0.393958	1378.58	1575.37	30.5419	30.7163	30.4707	30.6816	31.0466	30.7308	30.6581	30.7181	14	14	14	63.4	63.4	63.4	28.756	0	323.31	54713000000	377	1317.99	1489.09	1253.88	1453.37	1876.56	1504.27	1429.68	1490.96	111.097	203.407	0.0805882	0.129117	30.7367	30.911	30.6655	30.8763	31.2413	30.9255	30.8529	30.9128	30.8937	11.3021	49
P06710;P06710-2	DNA polymerase III subunit tau	dnaX	0.185655	0.759418	0.415803	229.187	261.938	29.3096	29.5291	29.1943	29.3472	29.7776	29.5781	29.3144	29.4527	21	21	21	38.3	38.3	38.3	71.137	0	237.65	31876000000	275	222.774	259.776	205.482	228.716	309.141	268.844	223.518	246.249	22.649	36.5063	0.0988232	0.13937	28.1976	28.4171	28.0822	28.2352	28.6656	28.4661	28.2024	28.3407	28.288	4.24793	36
Q1R637;Q0TCG6;P0A7Z6;P0A7Z5;P0A7Z4;A8A5A0;A7ZSI4;A1AGI6	DNA-directed RNA polymerase subunit alpha	rpoA	0.185562	1.09621	0.371344	14078.7	16103.8	34.3309	34.2318	34.3068	34.2041	34.6707	34.3446	34.3058	34.4948	38	38	38	93	93	93	36.511	0	323.31	1400900000000	2481	14698.8	13713.1	14452.7	13450.2	18646.8	14840.3	14442.5	16485.4	592.481	1912.15	0.0420834	0.118739	34.1812	34.082	34.1571	34.0544	34.521	34.1949	34.1561	34.345	34.1691	15.0993	312
P11349	Respiratory nitrate reductase 1 beta chain	narH	0.18503	0.898233	0.394152	828.133	949.443	30.9397	30.8796	30.9063	30.8409	31.2815	31.1377	30.795	31.0924	27	27	27	61.5	61.5	61.5	58.066	0	323.31	133940000000	692	856.22	820.91	836.442	798.96	1087.71	983.504	773.703	952.854	24.2291	130.607	0.0292575	0.137562	30.1206	30.0605	30.0872	30.0218	30.4624	30.3186	29.9759	30.2734	30.1039	2	89
P0AES0	Bifunctional glutathionylspermidine synthetase/amidase	gss	0.184833	0.603877	0.453867	108.969	126.023	28.24	28.2713	28.292	28.2999	28.8814	28.3157	28.4045	28.241	21	21	21	45.6	45.6	45.6	70.531	0	323.31	15858000000	244	106.259	108.613	110.198	110.808	166.49	112.041	119.228	106.331	2.02966	27.4898	0.018626	0.218134	27.1403	27.1716	27.1923	27.2002	27.7817	27.216	27.3048	27.1413	27.1962	6.67242	27
P50456	Protein mlc	mlc	0.18473	0.613828	0.452718	59.4408	68.4562	26.7831	26.8081	26.5898	26.7684	27.2973	26.9179	26.6857	26.7874	11	11	11	35.7	35.7	35.7	44.316	0	104.99	4459900000	91	61.2655	62.3482	53.5109	60.6386	87.8157	67.3294	57.2264	61.4533	4.01584	13.5549	0.0675603	0.198009	26.3538	26.3788	26.1605	26.3391	26.868	26.4886	26.2564	26.3582	26.356	5.78136	15
P0AE10;P0AE09;P0AE08	Alkyl hydroperoxide reductase C	ahpC	0.184637	0.895108	0.395405	26377.2	30140.1	34.1961	34.3632	34.398	34.4376	34.7897	34.4029	34.4146	34.5262	19	19	19	94.7	94.7	94.7	20.761	0	323.31	1102700000000	950	23655.6	26591.8	27248.2	28013.1	35846.6	27341.8	27565.6	29806.3	1905.07	3963.77	0.0722243	0.131511	34.8608	35.0279	35.0627	35.1023	35.4545	35.0676	35.0793	35.1909	35.0735	16.2481	111
C4ZYI6;P24224;B1LP76;B7NRL6;B7N6F1;B7LDF6;B6I5D7;B7M8H6;B1IVR4;A7ZQ07;Q8XA39;A8A373;Q1R8H0;A1AE93;B7MIP8;B7MYJ4;B7UH03;Q0TES5;Q8FF19	Holo-[acyl-carrier-protein] synthase	acpS	0.184152	0.418939	0.52024	128.889	133.949	26.4035	26.1736	25.6535	25.952	26.5422	26.0756	26.0646	26.2369	6	6	6	51.6	51.6	51.6	14.052	0	18.792	1698800000	43	149.852	127.575		109.238	165.129	119.114	118.198	133.356	20.3387	21.9142	0.157801	0.163601	27.6313	27.4015		27.1798	27.77	27.3034	27.2924	27.4647	27.4015	6.37504	4
A1ABI5;B7M0J7;Q8X644;Q1RBF5;P77570;C4ZYA3;B7URY1;B7NTZ2;B7NB94;B7M9Z4;B7L5J3;B6IB79;B5Z474;B1XFV2;B1LEP6;B1IQB4;A8A0I3;A7ZMA2;Q0THI8;B7MVB8;Q8FH85	Anhydro-N-acetylmuramic acid kinase	anmK	0.183643	0.365641	0.545693	56.7661	64.6053	26.4227	26.9061	26.4281	26.1726	27.1254	26.5047	26.4709	26.5631	5	5	5	21.1	21.1	21.1	39.494	0	37.488	1791500000	44	53.4783	75.0175	53.6802	44.8886	87.4696	56.6361	55.315	59.0003	12.839	15.3189	0.226174	0.237116	26.1597	26.6431	26.1651	25.9096	26.8624	26.2416	26.2079	26.3	26.2248	5.93074	5
P30870;C4ZQX0;B7NJR6;B7ND41;B1XG58;B1IRR3;A8A4K7;B1LF44;B6I424;Q8FDH4;B7N0K2;B7MAC9;B7LZK2;Q8XBM3;B5YR92;B7UIW1	Bifunctional glutamine synthetase adenylyltransferase/adenylyl-removing enzyme	glnE	0.183473	0.716557	0.429255	30.0158	34.3866	27.1657	27.0506	27.0856	26.9047	27.5602	27.106	27.0673	27.2069	21	21	21	30	30	30	108.42	0	150.52	6422900000	149	32.44	29.9294	30.671	27.023	42.7608	31.1126	30.2816	33.3913	2.25612	5.73549	0.0751645	0.166795	25.4457	25.3306	25.3656	25.1848	25.8402	25.386	25.3474	25.487	25.3758	4.85798	14
P58162;P36655;Q8CVH5;Q1R3C4;Q0T9Q5	Thiol:disulfide interchange protein DsbD	dsbD	0.183374	0.406444	0.525111	152.462	176.311	28.6853	28.5944	28.6656	28.283	29.177	28.458	28.8731	28.4536	7	7	7	17.2	17.2	17.2	61.838	0	46.402	6702800000	56	165.755	155.538	163.487	125.067	233.884	141.369	189.052	140.939	18.7813	44.531	0.123187	0.25257	27.7754	27.6845	27.7557	27.3731	28.2672	27.5481	27.9632	27.5437	27.7201		7
A8A0I1;B1IQB6;B1LEP8;B1XFV0;B7NB92;B7URX9;C4ZYA1;P0AFI7;B7MVB6;B5Z472;Q8FH87;Q1RBF7;Q0THJ0;B7NTZ4;B7M9Z2;B7M0J5;Q8X647;B6IB77;A1ABI3;B7L5J1;A7ZMA0	Pyridoxine/pyridoxamine 5-phosphate oxidase	pdxH	0.18331	0.640951	0.447302	473.177	543.664	28.8163	29.0492	28.8691	28.8866	29.4527	29.075	28.9156	28.9113	9	9	9	52.3	52.3	52.3	25.545	0	163.57	20979000000	186	443.76	522.341	460.472	466.136	692.848	531.84	475.691	474.277	34.1245	103.006	0.0721179	0.189466	29.1819	29.4148	29.2347	29.2522	29.8182	29.4405	29.2811	29.2769	29.279	7.85798	23
P0AGM6;P0AGM5	UPF0162 protein YchA	ychA	0.183102	0.573003	0.470985	875.345	1007.53	30.0212	29.931	30.0955	30.1747	30.4337	30.0487	29.9512	30.5212	5	5	5	15.2	15.2	15.2	30.841	0	31.38	10915000000	48	852.792	800.635	898.342	949.61	1138.39	869.401	812.01	1210.32	63.5989	196.261	0.0726559	0.194794	30.1149	30.0248	30.1892	30.2685	30.5275	30.1424	30.0449	30.615	30.1658		4
P26646	Probable acrylyl-CoA reductase AcuI	acuI	0.182127	1.02663	0.385331	616.72	699.916	29.5632	29.9043	29.7157	29.7134	30.076	29.8883	29.8587	29.8021	14	14	14	56.2	56.2	56.2	34.723	0	323.31	55393000000	318	549.017	697.095	610.873	609.894	786.148	689.33	675.229	648.957	60.8952	59.8727	0.0987404	0.0855426	29.4859	29.827	29.6384	29.6361	29.9987	29.811	29.7814	29.7248	29.7531	10.2703	34
P15640;Q8X612;Q8FB69	Phosphoribosylamine--glycine ligase	purD	0.182036	0.773914	0.421195	150.068	171.199	28.1178	27.9498	28.249	28.1259	28.5093	28.3314	28.0313	28.2986	12	12	12	43.4	43.4	43.4	45.94	0	323.31	8607900000	153	150.409	133.717	164.88	151.265	197.839	174.672	141.571	170.713	12.7579	23.0925	0.0850145	0.134887	27.6366	27.4686	27.7678	27.6447	28.0281	27.8502	27.5501	27.8175	27.7063	8.72451	18
P37745	dTDP-4-dehydrorhamnose 3,5-epimerase	rfbC	0.181846	0.687626	0.437621	1089.41	1250.39	29.7526	29.8593	29.8216	29.9018	30.3098	30.0518	29.7051	29.996	7	7	7	55.1	55.1	55.1	21.27	0	158.38	23817000000	178	1028.43	1108.18	1079.34	1141.69	1519.12	1268.11	994.772	1219.55	47.9803	215.113	0.0440424	0.172037	30.3824	30.489	30.4514	30.5316	30.9395	30.6816	30.3348	30.6258	30.5103	9.31061	22
B1XAY2;C4ZX82;P04079;B7MHY8;Q1R8M9;Q0TEY1;P64295;P64294;B7UGU5;B7NQV3;B7MYD5;B7M7L1;B7LCP7;B6I579;B5Z0X6;B1LNF9;B1IWF4;A8A313;A1AE43;A7ZPV1;B7N691	GMP synthase [glutamine-hydrolyzing]	guaA	0.181787	2.37598	0.291876	1996.59	2268.53	32.1641	32.129	32.2296	32.1315	32.4442	32.3111	32.3226	32.3036	42	42	42	78.7	78.7	78.7	58.679	0	323.31	500740000000	1927	1996.55	1948.07	2090.27	1951.49	2429.04	2212.89	2230.84	2201.36	66.2425	107.69	0.0331778	0.047471	31.3299	31.2948	31.3954	31.2973	31.6099	31.4768	31.4883	31.4693	31.4324	11.8986	267
P08337	8-oxo-dGTP diphosphatase	mutT	0.18072	0.92843	0.398681	185.249	210.884	26.932	26.7169	26.8113	26.702	27.0719	26.8192	27.1542	26.8397	6	6	6	45	45	45	14.927	0	59.206	2360000000	49	204.113	175.567	187.566	173.751	225.121	188.612	238.471	191.332	13.9898	24.7795	0.0755189	0.117503	28.0727	27.8575	27.9519	27.8427	28.2126	27.9599	28.2949	27.9803	27.9701	0	9
A1A7L3;B7NID0;Q1RG21;Q0TLG4;P0A7V2;P0A7V1;P0A7V0;B7UIL4;C4ZRR1;B7N836;B7MP29;B7MBF0;B5Z0E7;B1XD38;B1LGX0;B1IQH2;B7LGN0;A7ZHQ9;A7ZWB5;B6HZE3;B7M1A9	Small ribosomal subunit protein uS2	rpsB	0.180491	1.29591	0.36165	28980.8	32916.9	34.7172	34.9233	34.8892	34.8671	35.1506	34.87	35.0542	35.0441	20	20	19	80.5	80.5	80.5	26.743	0	323.31	1907100000000	3923	26382.9	30478.2	29759.1	29303	35735.4	29361.6	33402.1	33168.6	1798.21	2638.37	0.0620482	0.0801524	35.0166	35.2227	35.1886	35.1666	35.45	35.1694	35.3536	35.3436	35.2057	16.1232	481
P08394	RecBCD enzyme subunit RecB	recB	0.180378	0.433851	0.521139	15.028	17.4592	26.4736	26.3021	26.3214	26.3839	26.6678	26.273	26.2494	27.0123	12	12	12	13.2	13.2	13.2	133.96	0	76.081	2577000000	74	16.1381	14.3117	14.5067	15.1555	18.488	14.0231	13.7936	23.5321	0.823274	4.58922	0.0547826	0.262853	24.4485	24.2769	24.2963	24.3588	24.6426	24.2478	24.2243	24.9872	24.3275	4.9542	10
P0ACS8;P0ACS7	HTH-type transcriptional regulator RpiR	rpiR	0.179874	0.52785	0.486049	148.299	169.26	27.3272	27.7269	27.5851	27.6958	28.0373	27.5825	27.5095	27.9252	8	7	6	39.2	36.8	32.1	32.362	0	89.922	4962500000	86	123.192	162.97	147.572	159.459	202.529	147.306	139.964	187.243	17.9876	30.3888	0.121294	0.179539	27.3515	27.7512	27.6094	27.7201	28.0616	27.6068	27.5338	27.9495	27.6647	5.32193	8
P75867	Putative Lon protease homolog	ycbZ	0.179411	1.35746	0.359734	360.992	410.007	29.913	29.9488	29.7826	29.8981	30.0942	30.1594	29.8874	30.119	21	21	21	44	44	44	65.818	0	271.29	30104000000	287	367.633	376.964	335.557	363.813	417.367	436.864	361.11	424.686	17.8334	33.5752	0.0494012	0.0818895	28.9131	28.9489	28.7827	28.8982	29.0943	29.1595	28.8875	29.1192	28.931	6.72792	38
P0A9I3	Glycine cleavage system transcriptional repressor	gcvR	0.1791	0.435775	0.520548	380.663	440.211	28.3711	28.2033	28.1796	28.425	28.9407	28.4326	28.1042	28.4178	5	5	5	55.3	55.3	55.3	20.768	0	164.29	9905400000	128	400.472	356.079	350.226	415.876	596.732	418.092	332.217	413.803	32.4714	111.577	0.0853021	0.253463	29.0353	28.8675	28.8438	29.0892	29.6049	29.0968	28.7684	29.0821	29.0587	7.74147	13
P75830;P64176	Macrolide export protein MacA	macA	0.177946	0.58826	0.477567	54.2132	61.6399	26.6763	26.5661	26.3064	26.35	26.6707	26.9623	26.5069	26.4707	9	9	9	38.5	38.5	38.5	40.623	0	156.52	3236500000	76	62.0742	57.4669	47.9134	49.3982	61.8348	75.8403	55.1314	53.7531	6.71451	10.1036	0.123854	0.163914	26.3726	26.2624	26.0027	26.0463	26.367	26.6586	26.2032	26.167	26.2328	4.70044	8
P25894	Metalloprotease LoiP	loiP	0.17743	0.459815	0.515418	412.883	474.366	28.7474	28.5747	28.8676	28.9247	29.4133	28.893	28.7498	28.768	10	10	10	64.3	64.3	64.3	26.842	0	323.31	20888000000	189	402.214	356.405	437.544	455.368	641.131	445.376	402.89	408.066	43.6528	112.776	0.105727	0.237741	29.0415	28.8688	29.1618	29.2188	29.7074	29.1871	29.0439	29.0621	29.1119	9.57743	24
A7ZHL0;A7ZW70;B1IQL9;B1LGS2;B1XC96;B6HZ96;B7LFY8;B7M162;C4ZRL4;P09158;B7N7Z1;P66834;P66833;B7UIG9;B7NI81;Q1RG70;B7MNY3;B7MBA4;B5YZF6;Q0TLL3;A1A7G7	Polyamine aminopropyltransferase	speE	0.1753	0.514158	0.498048	1257.37	1432.62	30.7012	30.4179	30.8177	30.6067	31.1323	30.646	30.551	30.9156	10	10	10	51	51	51	32.321	0	323.31	72059000000	356	1309.41	1073.8	1420.68	1225.57	1770.69	1259.73	1178.64	1521.41	146.16	268.685	0.116243	0.187548	30.7274	30.444	30.8438	30.6329	31.1584	30.6721	30.5771	30.9417	30.6997	10.1459	50
P76576	Ancillary SecYEG translocon subunit	yfgM	0.174658	0.76958	0.436556	2102.54	2391.9	30.9186	30.7328	30.8041	30.8742	30.9646	31.1038	30.737	31.2229	12	12	12	68.9	68.9	68.9	22.176	0	323.31	52582000000	376	2230.64	1958.51	2058.75	2162.27	2303.58	2539.45	1964.27	2760.31	119.217	340.669	0.0567011	0.142426	31.4882	31.3024	31.3737	31.4438	31.5342	31.6734	31.3066	31.7925	31.466	10.6064	42
P75823;P58319	Low specificity L-threonine aldolase	ltaE	0.174645	0.816135	0.429187	750.465	853.899	30.1364	30.1015	29.9848	30.0984	30.5165	30.2266	30.0219	30.2545	14	14	14	51.4	51.4	51.4	36.494	0	273.31	44197000000	235	779.925	761.104	701.399	759.432	1017.75	830.804	719.872	847.168	34.0049	123.004	0.0453118	0.14405	29.9873	29.9524	29.8358	29.9493	30.3675	30.0776	29.8729	30.1054	29.9699	8.683	22
P65765;P65764;P45523	FKBP-type peptidyl-prolyl cis-trans isomerase FkpA	fkpA	0.174025	0.982811	0.406093	4059.77	4602.53	32.2344	32.0414	32.143	32.2002	32.5682	32.2782	32.2364	32.2322	16	16	16	58.1	58.1	58.1	28.912	0	323.31	173290000000	408	4286.92	3745.2	4021.26	4185.72	5415.83	4420.67	4293.19	4280.41	236.572	545.888	0.0582721	0.118606	32.4213	32.2283	32.3299	32.3871	32.7551	32.4652	32.4234	32.4191	32.4202	13.3768	50
P0A9S6;P0A9S5	Glycerol dehydrogenase	gldA	0.173507	0.918475	0.416283	347.782	394.504	28.9915	29.096	29.1594	29.019	29.3993	29.1677	29.3679	29.0251	11	11	11	43.3	43.3	43.3	38.712	0	118.04	19184000000	184	329.645	354.665	370.758	336.058	438.568	372.914	429.053	337.482	18.6341	47.7943	0.0535798	0.12115	28.7573	28.8618	28.9252	28.7848	29.1651	28.9335	29.1338	28.7909	28.8935	5.75489	24
P0A9P5;P0A9P4	Thioredoxin reductase	trxB	0.173341	0.651805	0.46989	3664.12	4173.68	32.3865	32.1645	32.2484	32.2725	32.7289	32.3989	32.1522	32.4852	14	14	14	66.4	66.4	66.4	34.623	0	323.31	227660000000	460	3975.07	3402.67	3608.72	3670.02	5051.84	4009.68	3373.68	4259.51	236.749	694.124	0.0646128	0.16631	32.3134	32.0913	32.1753	32.1994	32.6558	32.3258	32.0791	32.4121	32.2564	12.4276	56
A1AIL8;B7N2P8;Q1R3P5;B6I5Q6;P0A7A8;P0A7A7;C5A134;B7UPK2;B7NS05;B7NFY5;B7MJ31;B7M7V4;B7LAY9;B1XC40;B1IUL1;A8A7E1;A7ZUR3;B5Z182;B1LPK6;P58130	Glycerol-3-phosphate acyltransferase	plsB	0.173316	0.885132	0.421214	247.042	280.399	29.9197	29.8197	29.7677	29.9063	30.2502	29.9368	29.8281	30.0916	39	39	39	64.4	64.4	64.4	93.695	0	323.31	109510000000	864	258.542	241.069	232.434	256.124	325.863	261.652	242.474	291.605	12.4337	36.4338	0.0503302	0.129936	28.4103	28.3104	28.2583	28.3969	28.7408	28.4274	28.3187	28.5822	28.4036	8.53138	113
Q1R627;Q0TCF8;P0A7W3;P0A7W2;P0A7W1;B1IPZ6;A8A5A8;A7ZSJ2;A1AGJ2	Small ribosomal subunit protein uS5	rpsE	0.173192	1.39405	0.371807	51622.5	58450.8	35.0884	35.0526	35.0475	35.1012	35.2867	35.0794	35.2251	35.3912	13	13	13	81.4	81.4	81.4	17.603	0	323.31	1791800000000	1975	52195.6	50904.3	50723.9	52666.2	59970.4	51869.5	57440.1	64523.1	955.878	5276.27	0.0185167	0.0902685	35.9911	35.9554	35.9503	36.004	36.1895	35.9822	36.1279	36.294	35.9975	15.5984	245
A8A697;B1X969;C4ZXM7;P05523;B7MFJ6;B7L758;Q8FC87;Q1R4V8;P64148;B7ULJ0;B7NET9;B7N2X1;B7M4B9;B6I3L2;B5YWD3;B1LK72;B1IZF8;A7ZTI6;A1AHG8;B7NPE1;Q0TBH4	Formamidopyrimidine-DNA glycosylase	mutM	0.173098	0.559157	0.489202	96.4867	109.369	26.9479	27.0364	26.6339	26.8823	27.2516	26.7205	27.0638	27.157	11	11	11	52.4	52.4	52.4	30.29	0	105.45	5700500000	73	100.99	107.445	81.0597	96.4521	124.915	86.1248	109.527	116.911	11.2303	16.7219	0.116392	0.152894	27.0677	27.1562	26.7537	27.002	27.3713	26.8403	27.1836	27.2768	27.1119	4.39232	9
A7ZLX7;B7L7M1;P0A6L8;P0A6L7;C4ZWT8;B7LZC3;B7N4U6;B6IAS4;B5Z1X8;B1LF94;B1IRT9;A8A074;Q1RBP6;A1ABA1;B7MMY5;B7URP8;Q0THR7;B7NIJ4	Altronate oxidoreductase	uxaB	0.172714	0.415691	0.538133	44.8648	51.1562	26.852	26.6915	26.6351	26.3579	27.2418	26.6323	26.5641	26.7891	11	11	10	28.8	28.8	25.5	54.822	0	30.466	2793000000	58	51.8614	46.3504	44.5536	36.6939	68.137	44.4672	42.3947	49.626	6.27216	11.7217	0.139801	0.229136	26.1158	25.9554	25.8989	25.6217	26.5057	25.8961	25.828	26.0529	25.9271	4.9542	5
P0ADT7;P0ADT6;P0ADT5	Putative acid--amine ligase YgiC	ygiC	0.172698	0.587759	0.484343	323.303	370.006	29.2098	29.2073	29.1358	29.1727	29.7206	29.4059	29.1179	29.172	19	19	19	60.1	60.1	60.1	45.025	0	323.31	28186000000	310	329.716	329.138	313.086	321.273	471.493	378.257	309.167	321.107	7.82473	74.0722	0.0242024	0.200192	28.7576	28.7551	28.6837	28.7206	29.2685	28.9538	28.6657	28.7198	28.7379	8.78136	41
P37649	Probable cyclic di-GMP phosphodiesterase PdeK	pdeK	0.172454	0.934551	0.416011	32.8784	37.1591	26.4704	26.6881	26.7295	26.6633	26.9619	26.769	26.8886	26.6216	18	18	18	32.2	32.2	32.2	74.38	0	89.169	3871300000	118	29.1722	33.9752	34.9751	33.391	41.1555	35.9561	39.0953	32.4295	2.55592	3.80947	0.0777386	0.102518	25.294	25.5117	25.5532	25.487	25.7856	25.5927	25.7122	25.4452	25.5325	2	10
A1AI34;B7N2F3;Q8FBI1;Q1R465;Q0TAK9;P21165;C5A021;B7NFE8;B7UNH5;B7MHD2;B7L9A5;B1XAK9;B1LM33;B1IW60;A8A6V2;A7ZU52;B7NV19;B5YY94;Q8X8I1;B6I4I7;B7M650	Xaa-Pro dipeptidase	pepQ	0.17219	0.721517	0.453191	798.391	903.109	30.4404	30.7767	30.6793	30.6007	31.0379	30.6199	30.691	30.8371	21	21	21	59.4	59.4	59.4	50.189	0	323.31	115710000000	542	699.349	885.032	826.73	782.452	1062.63	793.036	833.484	923.287	78.2584	119.468	0.0980201	0.132285	29.8316	30.1679	30.0706	29.9919	30.4291	30.0111	30.0822	30.2283	30.0764	10.8742	68
P0ABU8;P0ABU7	Biopolymer transport protein ExbB	exbB	0.172187	0.463215	0.521993	424.752	487.603	28.9273	28.7682	28.7146	28.7612	29.2937	28.684	28.6926	29.1897	7	7	7	36.9	36.9	36.9	26.287	0	232.83	15125000000	213	465.937	416.833	401.457	414.78	602.205	392.961	395.326	559.918	28.2902	109.293	0.066604	0.224144	29.2516	29.0925	29.0388	29.0854	29.618	29.0083	29.0168	29.514	29.089	9.13186	29
P0A8Y2;P0A8Y1	Pyrimidine 5-nucleotidase YjjG	yjjG	0.171929	0.165698	0.701903	257.395	321.424	28.1715	27.8834	27.9306	28.0932	29.0457	28.2968	27.1329	28.2911	6	6	6	35.6	35.6	35.6	25.3	0	69.258	5620500000	83	285.306	233.187	241.009	270.078	526.159	311.455	137.877	310.206	24.4568	158.988	0.0950166	0.494635	28.551	28.2629	28.31	28.4727	29.4252	28.6762	27.5124	28.6705	28.5118	6.06609	13
P0AED5;P66798;P66797	Response regulator UvrY	uvrY	0.170877	0.543977	0.497659	543.253	619.559	28.8666	29.0969	29.0684	28.9921	29.5046	29.0703	28.866	29.2666	11	11	11	69.3	69.3	69.3	23.892	0	262.96	17416000000	159	491.78	577.844	566.432	536.955	768.741	567.182	491.577	650.736	38.3966	118.814	0.0706792	0.191771	29.3286	29.559	29.5305	29.4542	29.9667	29.5324	29.3281	29.7287	29.5314	7.52356	26
P0A9K5;P0A9K4;P0A9K3	PhoH-like protein	ybeZ	0.170745	0.587636	0.485743	1141.71	1299.26	30.706	30.8825	30.658	30.8525	31.2936	30.9473	30.7154	30.8256	23	23	23	74.9	74.9	74.9	39.038	0	323.31	90307000000	448	1085.68	1228.45	1049.75	1202.94	1638.21	1285.51	1092.82	1180.51	87.3116	239.304	0.0764747	0.184185	30.4597	30.6362	30.4117	30.6062	31.0473	30.701	30.4691	30.5793	30.5928	10.5048	56
P37746	Putative O-antigen transporter	rfbX	0.170681	0.515302	0.505714	78.8733	89.696	27.3393	27.0676	27.035	27.2484	27.5447	27.5886	27.0352	27.2047	5	5	5	14.2	14.2	14.2	45.382	0	76.016	4452400000	114	88.2954	72.9993	71.348	82.8504	101.945	105.128	71.3585	80.3522	8.07726	16.4495	0.102408	0.183392	26.8758	26.6041	26.5714	26.7849	27.0811	27.125	26.5716	26.7412	26.763		16
P09053	Valine--pyruvate aminotransferase	avtA	0.170536	0.594995	0.48556	156.671	178.232	28.2901	28.2801	28.1506	28.0673	28.7067	28.3755	28.1246	28.2635	13	13	13	28.8	28.8	28.8	46.711	0	101.6	12407000000	136	166.871	165.705	151.339	142.769	223.374	177.155	148.61	163.79	11.6527	32.2748	0.074377	0.181083	27.785	27.775	27.6454	27.5622	28.2015	27.8704	27.6194	27.7583	27.7666	8.5812	21
B1IUQ7;B1XBZ3;C5A0T1;P30139;B6I5K1;B7LA84;B7M738;A8A790;A7ZUK5;B7NFT1;B7UPE5;Q8FB81;P58263;B7MIX6;B7N2J2;Q0TA75;B7NRS3	Thiazole synthase	thiG	0.169204	1.35404	0.384371	152.654	171.666	27.3777	27.4162	27.4537	27.2064	27.5557	27.567	27.5884	27.4197	10	10	10	50.8	50.8	50.8	26.896	0	42.129	6590900000	80	153.852	158.05	162.258	136.458	174.272	175.646	178.305	158.442	11.3297	8.97374	0.0742177	0.0522743	27.6689	27.7074	27.7449	27.4976	27.8469	27.8582	27.8796	27.7109	27.7279		8
A7ZSH7;P36929;A8A593;B1IQ11;B1X6E1;B6I202;B7LHZ0;B7M0Z4;C4ZUE3;B1LGP5;B5YT08;Q8XEE5;B7UK12;B7NDR0;B7NLK8;A1AGI0;B7MCQ4;Q0TCH3;Q1R644;B7N0S9	Ribosomal RNA small subunit methyltransferase B	rsmB	0.168784	1.41956	0.379626	371.391	419.016	29.4469	29.531	29.4614	29.4858	29.7684	29.739	29.5219	29.5708	16	16	7	58.7	58.7	29.8	48.319	0	323.31	30568000000	313	362.457	384.454	366.176	372.475	453.987	444.737	382.02	395.318	9.64057	35.6594	0.025958	0.0851029	28.8928	28.977	28.9074	28.9318	29.2144	29.185	28.9679	29.0168	28.9725	7.66534	46
P0A709;P0A708;P0A707;C4ZYI0;B7USA1;B1IPL0	Translation initiation factor IF-3	infC	0.168719	0.943726	0.423623	8897.68	10034.9	32.9225	32.7113	32.6952	32.8025	33.1495	32.9767	32.8047	32.8755	12	12	12	61.7	61.7	61.7	20.564	0	323.31	293420000000	627	9791.33	8445.67	8351.18	9002.55	11478.2	10170.1	9016.3	9474.77	661.459	1072.81	0.0743406	0.106908	33.6009	33.3898	33.3737	33.481	33.828	33.6551	33.4831	33.554	33.5186	13.7202	79
P37692	ADP-heptose--LPS heptosyltransferase 2	rfaF	0.168613	0.464807	0.525469	313.133	358.771	28.9986	28.9134	28.8176	28.9847	29.54	29.0947	28.8127	28.9414	16	16	16	57.5	57.5	57.5	39.042	0	187.42	18429000000	187	328.463	309.429	289.363	325.277	479.838	351.309	288.38	315.555	17.8998	84.7259	0.0571634	0.236156	28.7522	28.6669	28.5712	28.7383	29.2935	28.8482	28.5663	28.6949	28.7166	8.54303	22
Q0TDT0;P0A7A0;P0A799;B1IT77;A7ZR34;A1AFB0;Q8XD03;A8A466	Phosphoglycerate kinase	pgk	0.167729	1.31803	0.389027	18448	20811.1	34.8056	34.8619	34.8418	34.7971	35.1775	34.906	34.8902	35.0036	33	33	33	89.7	89.7	89.7	41.118	0	323.31	2200200000000	4373	18176.1	18906.2	18642	18067.8	23582	19498.9	19284.8	20878.5	394.137	1977.7	0.0213647	0.0950311	34.4845	34.5407	34.5206	34.4759	34.8563	34.5848	34.569	34.6824	34.5549	15.8203	508
A7ZIN3	Chaperone protein HtpG	htpG	0.165907	0.818245	0.449546	2671.47	3018.18	32.8802	32.9368	32.7635	32.8704	33.3086	32.9427	32.897	32.9663	50	50	1	77.6	77.6	3.4	71.448	0	323.31	735120000000	1743	2701.69	2810.9	2489.89	2683.4	3646.92	2822.54	2733.69	2869.58	133.5	422.928	0.0499726	0.140127	31.7618	31.8184	31.6453	31.7522	32.1903	31.8243	31.7787	31.848	31.7986		229
P0ADE5;P0ADE4	Translocation and assembly module subunit TamA	tamA	0.165822	0.834972	0.446157	65.1836	73.2463	27.4121	27.6002	27.2818	27.3651	27.6687	27.4295	27.4869	27.7374	21	21	20	48.9	48.9	47.1	64.795	0	275.18	7690900000	122	64.8386	73.9686	59.1861	62.741	77.601	65.6343	68.3267	81.4231	6.3043	7.48264	0.0967161	0.102157	26.4348	26.6229	26.3045	26.3878	26.6914	26.4522	26.5096	26.7601	26.4809	5.90689	18
P37349	PEP-dependent dihydroxyacetone kinase, phosphoryl donor subunit DhaM	dhaM	0.165375	0.392314	0.562928	370.59	425.707	29.592	29.6452	29.4563	29.5762	30.1441	29.9229	29.4788	29.3853	22	22	22	62.1	62.1	62.1	51.448	0	323.31	57358000000	436	376.587	390.876	342.447	372.449	554.285	474.789	347.907	325.847	20.3547	107.96	0.0549252	0.253602	28.9475	29.0007	28.8117	28.9317	29.4995	29.2784	28.8343	28.7408	28.9396	8.46761	52
P0ABS3;P0ABS2;P0ABS1	RNA polymerase-binding transcription factor DksA	dksA	0.165248	0.849154	0.445106	7018.05	7858.53	32.3726	32.0496	32.3214	32.0946	32.432	32.4316	32.2093	32.4263	12	12	11	65.6	65.6	56.3	17.528	0	323.31	185650000000	502	7829.44	6244.81	7553.43	6444.51	8162.04	8159.35	6983.55	8129.19	789.902	583.513	0.112553	0.0742522	33.2816	32.9586	33.2303	33.0035	33.341	33.3405	33.1183	33.3352	33.2559	14.2581	50
P23898	Probable endopeptidase NlpC	nlpC	0.16504	0.22128	0.664171	165.74	151.258	26.9203	25.6985	27.0066	26.5759	26.7314	26.7104	26.7261	26.6934	5	5	5	59.7	59.7	59.7	17.283	0	144.59	1800500000	27	174.583		185.458	137.178	152.963	150.731	152.395	148.942	25.3261	1.81122	0.152806	0.0119744	27.8495		27.9358	27.5051	27.6607	27.6397	27.6553	27.6226	27.6553		5
A7ZVS7;B7LEN0;P0ABP9;P0ABP8;C4ZT66;B7MNJ1;B7LXU6;B7NH52;B6I6N1;B5Z4R6;B1XFJ4;B1LEI9;A8A8B3;Q0T8S9;B1IS35;B7N2V8;B7NW64;B7UR12;Q8FA51	Purine nucleoside phosphorylase DeoD-type	deoD	0.164797	0.801081	0.454038	8924.05	10063.8	33.0916	33.2586	33.0809	33.0624	33.5524	33.2322	33.1292	33.2389	19	19	19	88.7	88.7	88.7	25.95	0	323.31	419250000000	1145	8714.42	9794.76	8649.32	8537.71	12031.8	9615.71	8946.81	9660.93	585.042	1351.99	0.0655579	0.134342	33.4345	33.6014	33.4238	33.4052	33.8952	33.5751	33.4721	33.5818	33.5236	14.1868	149
A7ZY64;B1IXG1;B1X7D7;C4ZXX9;P75782;B7MQR1;Q8FJM4;Q1REB8;Q0TJP1;B7UM03;B7NNN9;B7NAA7;B7M782;B7MGR5;Q8X7W6;B7LC90;B5YS99;A7ZJM2;A1A947;B1LM99	Ribosomal RNA large subunit methyltransferase F	rlmF	0.16443	0.679875	0.482397	245.632	277.955	28.4857	28.3562	28.3383	28.3899	28.8222	28.3291	28.4201	28.6564	8	8	8	36	36	36	34.226	0	204.78	9914700000	132	261.977	239.267	236.3	244.986	331.585	234.78	250.215	295.241	11.477	44.0022	0.0467243	0.158307	28.4292	28.2996	28.2818	28.3334	28.7657	28.2726	28.3636	28.5999	28.3485	5.45943	15
P06715	Glutathione reductase	gor	0.164357	0.697622	0.478774	722.623	815.739	30.4872	30.5377	30.3062	30.4418	30.8765	30.6513	30.4058	30.4968	21	21	21	70.2	70.2	70.2	48.772	0	323.31	93212000000	421	743.887	770.649	655.327	720.628	976.964	834.453	702.662	748.877	49.2996	120.555	0.0682232	0.147786	29.9198	29.9702	29.7387	29.8744	30.309	30.0838	29.8383	29.9293	29.9245	10.4491	55
A1AIF2;B7UNV0;Q1R5X9;Q0TA86;P0A6I5;P0A6I4;P0A6I3;C5A0R9;B7NR61;B7MR65;B7MIW5;B7M726;B7LA72;B1XBY1;A8A778;A7ZUJ0;B1LNT0;B7NFR9	Pantothenate kinase	coaA	0.164043	0.415291	0.55542	656.734	753.746	29.8946	29.889	29.8947	29.8634	30.4991	30.1427	29.7147	29.8414	17	17	17	55.7	55.7	55.7	36.359	0	323.31	32374000000	255	660.944	658.362	660.986	646.644	1009.15	786.335	582.719	636.782	6.83745	190.807	0.0104113	0.253145	29.7509	29.7453	29.751	29.7197	30.3553	29.999	29.571	29.6977	29.7481	8.98869	34
Q1R6H2;Q0TCU3;P60342;P60341;P60340;B1IQV5;A8A4Y2;A1AG71;A7ZS63	tRNA pseudouridine synthase B	truB	0.163996	0.950679	0.433733	360.723	406.935	28.9875	28.9607	28.9832	28.9817	29.3664	29.1907	28.967	29.0451	17	17	17	54.5	54.5	54.5	35.087	0	238.34	21104000000	204	363.049	356.298	361.963	361.583	473.325	418.561	357.868	377.984	3.0149	50.9526	0.00835794	0.125211	28.8952	28.8684	28.8909	28.8894	29.274	29.0984	28.8746	28.9528	28.893	7.50779	24
A0A385XJE6;P0CE65;P0CE64;P0CE63;P0CE62;P0CE61;P0CE60;P0CE59;P0CE58;P0CE57;P0CE56;P0CE55;P0CE54;P0CE53;P0CE52;P0CE51;P0CE50;P0CE49;P76071	Transposase InsH for insertion sequence element IS5U	insH21	0.163439	0.777652	0.464624	700.34	789.611	29.9215	30.0729	30.1182	30.0213	30.4697	30.1653	30.1195	30.0331	10	10	10	34.7	34.7	34.7	37.851	0	160.15	17717000000	133	646.703	719.01	742.165	693.483	949.238	767.063	742.872	699.271	40.9139	110.053	0.05842	0.139376	29.7198	29.8712	29.9164	29.8195	30.2679	29.9636	29.9178	29.8314	29.8938	7.99435	15
P00903	Aminodeoxychorismate synthase component 2	pabA	0.163145	1.47782	0.389077	253.762	284.336	27.6356	27.6854	27.7025	27.8466	27.9338	27.7737	27.8768	27.9383	6	6	6	38	38	38	20.772	0	57.489	3223600000	44	239.252	247.737	250.718	277.341	294.793	263.544	283.274	295.733	16.4527	14.9741	0.0648352	0.0526635	28.2996	28.3493	28.3664	28.5106	28.5977	28.4377	28.5408	28.6023	28.4741	7	4
P25742	Lipopolysaccharide core heptosyltransferase RfaQ	rfaQ	0.162659	0.732188	0.477079	306.875	345.263	28.9753	28.9898	28.7558	28.8252	29.2907	29.0953	28.9227	28.888	10	10	10	43.3	43.3	43.3	38.73	0	100.48	14054000000	130	325.767	329.103	279.364	293.267	406.281	354.323	313.997	306.45	24.4475	45.7869	0.0796658	0.132615	28.7404	28.755	28.5209	28.5903	29.0559	28.8604	28.6879	28.6531	28.7141		27
A1A756;B7M9R6;Q8XA82;Q8FLD8;Q1RGK1;Q0TLY6;P00547;C4ZPT0;B7UI48;B7NHA6;B7N2U2;B7M0A0;B7L4C8;B6HZ00;B5YY97;B1XBC8;B1IRH0;A7ZVW2;A7ZH92;B1LFT4;B7N7M8	Homoserine kinase	thrB	0.161933	0.734392	0.478619	130.067	146.616	27.4859	27.3483	27.5214	27.4758	27.7591	27.3756	27.534	27.8104	10	10	10	31	31	31	33.609	0	16.919	4268600000	46	132.511	120.341	135.844	131.572	160.446	122.66	137.048	166.311	6.73835	20.3683	0.0518067	0.138923	27.4557	27.3181	27.4912	27.4455	27.7289	27.3453	27.5038	27.7802	27.4734	8.7879	5
P0A9L1;P0A9L0;P0A9K9	FKBP-type peptidyl-prolyl cis-trans isomerase SlyD	slyD	0.161523	0.531246	0.520094	8809.32	9891.68	32.9817	32.6152	32.8835	32.6529	33.1445	32.8504	32.6823	33.1022	6	6	6	67.3	67.3	67.3	20.853	0	323.31	184470000000	1696	10063.2	7785.76	9394.38	7993.9	11278.1	9179.56	8159.98	10949.1	1099.57	1477.18	0.124819	0.149336	33.64	33.2736	33.5418	33.3112	33.8028	33.5088	33.3406	33.7605	33.5253	14.8107	195
P0CB39;P0CB40	Phosphoethanolamine transferase EptC	eptC	0.161317	1.23644	0.412902	277.057	310.731	29.6016	29.5236	29.5401	29.4345	29.8147	29.7579	29.5616	29.611	28	28	28	58.4	58.4	58.4	66.609	0	276.18	25955000000	305	292.079	276.556	279.765	259.83	339.071	325.854	283.998	293.999	13.2916	25.9902	0.0479741	0.0836423	28.5845	28.5065	28.523	28.4174	28.7976	28.7408	28.5444	28.5939	28.5645	5.75489	28
P0CK95;E3PJ90	Putative lipoprotein AcfD homolog	yghJ	0.160479	1.04992	0.431386	99.8233	111.733	29.5242	29.329	29.4355	29.2844	29.7114	29.5572	29.4377	29.5087	56	56	55	45.1	45.1	44.7	167.24	0	323.31	93585000000	928	109.171	95.2248	102.599	92.2985	124.461	111.726	102.753	107.994	7.59065	9.2488	0.0760409	0.0827756	27.1789	26.9837	27.0903	26.9392	27.3662	27.212	27.0924	27.1635	27.1279		115
B1XFJ1;B7MNI8;B7NH49;C4ZT63;P0A6L0;P0A6L1;Q0T8T2;B7LEM7;Q8XB36;B7UR09;B7NW61;B7N2V7;B1IS38;B6I6M8;B5Z4R3;A8A8B0;A7ZVS4;B1LEI6;A1AJU8;B7LXU3	Deoxyribose-phosphate aldolase	deoC	0.160015	1.19433	0.41819	4548.98	5086.29	32.1505	32.3735	32.1872	32.3133	32.5073	32.2985	32.383	32.4759	19	19	19	79.2	79.2	79.2	27.733	0	323.31	180320000000	577	4216.1	4928.65	4325.99	4725.16	5412.49	4676.32	4961.33	5295.02	334.525	333.5	0.0735385	0.0655683	32.3975	32.6205	32.4342	32.5603	32.7543	32.5455	32.63	32.7229	32.5904	12.8078	68
Q8XCT6;Q8FK41;Q1RF04;Q0TKB2;P24186;C4ZUX7;B7UKK6;B7NL23;B7N983;B7MRJ2;B7ME52;B7M4N2;B7L7F6;B6I0H4;B5YPP4;B1XGC7;B1LKE8;B1IZ72;A7ZXI3;A7ZIT8;A1A8J4	Bifunctional protein FolD	folD	0.159265	1.05361	0.433269	922.059	1034.59	30.1914	30.1477	30.1338	30.0767	30.4156	30.244	30.1089	30.4183	13	13	13	47.2	47.2	47.2	30.955	0	141.2	36261000000	281	957.2	928.344	919.353	883.342	1119.86	993.088	903.432	1121.99	30.4451	106.197	0.0330186	0.102646	30.2798	30.2361	30.2222	30.1652	30.504	30.3324	30.1973	30.5067	30.258	10.5038	41
P11454;Q8XBV9	Enterobactin synthase component F	entF	0.158608	0.234037	0.661358	21.2753	24.8263	27.1928	26.7675	26.7988	27.0082	27.8099	26.9522	26.5983	27.0413	18	18	17	19	19	17.9	141.99	0	96.671	3954400000	90	25.177	18.6929	19.1078	22.1237	38.7837	21.2729	16.6049	22.6437	3.01718	9.65729	0.141816	0.388995	25.0837	24.6584	24.6897	24.899	25.7008	24.843	24.4892	24.9322	24.871	5	19
P37760	dTDP-4-dehydrorhamnose reductase	rfbD	0.158393	0.372576	0.579268	816.57	934.604	29.9883	30.0046	30.1007	30.0765	30.6541	30.0984	29.7775	30.2738	15	15	15	71.9	71.9	71.9	32.694	0	323.31	42489000000	249	785.729	794.742	850.062	835.745	1252.32	848.647	677.915	959.528	31.1821	241.417	0.0381867	0.258309	29.9979	30.0142	30.1103	30.0861	30.6637	30.1079	29.7871	30.2833	30.097	10.7789	27
P0ACI1;P0ACI0	Right origin-binding protein	rob	0.157951	0.693049	0.489635	342.053	384.747	28.7285	28.8851	28.7923	28.8696	29.2268	29.0339	28.9176	28.7291	14	14	14	52.9	52.9	52.9	33.144	0	129.75	18625000000	194	320.768	357.933	335.435	354.075	454.69	397.232	366.169	320.898	17.2585	56.1833	0.0504556	0.146027	28.7183	28.8749	28.7822	28.8594	29.2167	29.0237	28.9074	28.7189	28.8672	7.53138	18
P0ADK2;P0ADK1;P0ADK0	Uncharacterized protein YiaF	yiaF	0.15728	0.546341	0.524611	2851.25	3200.77	31.2773	31.5864	31.4405	31.5925	31.9625	31.4951	31.5575	31.5108	9	9	9	59.3	59.3	59.3	25.663	0	323.31	110150000000	306	2474.18	3071.95	2773.66	3085.22	3997.43	2881.64	3010.45	2913.57	289.627	533.919	0.101579	0.166809	31.6362	31.9453	31.7994	31.9515	32.3214	31.854	31.9164	31.8697	31.893	11.577	38
P0AC17;P0AC16	Dihydroneopterin aldolase	folB	0.15653	0.442782	0.55833	506.191	559.559	28.1451	28.3751	28.0812	27.7081	28.1309	28.4043	28.3204	28.0799	4	4	4	28.7	28.7	28.7	13.619	0	16.737	5892500000	77	523.539	615.048	500.632	385.543	518.374	627.717	591.943	500.205	94.4063	60.314	0.186504	0.107788	29.418	29.6481	29.3541	28.981	29.4039	29.6772	29.5934	29.3529	29.4109	8.10852	11
P0AEX5	Probable phosphoribulokinase	prkB	0.156093	0.524069	0.531575	81.4878	91.6008	26.7277	26.8909	26.5851	26.7244	26.8791	27.0305	26.5473	27.0955	7	7	7	42.2	42.2	42.2	32.344	0	66.535	2705700000	43	81.0069	90.8126	73.3087	80.8228	90.068	100.142	71.3945	104.799	7.17691	14.8074	0.0880734	0.161652	26.7528	26.916	26.6102	26.7495	26.9042	27.0556	26.5724	27.1206	26.8285	7.27612	3
P38051	Isochorismate synthase MenF	menF	0.155985	0.63321	0.50577	71.2735	79.7905	27.2391	27.1174	26.946	27.2271	27.5633	27.277	27.1564	27.1568	16	16	14	44.1	44.1	37.4	48.764	0	76.081	6115100000	107	76.5455	70.2958	62.3465	75.9061	96.0531	78.6055	72.2418	72.2615	6.58035	11.2479	0.0923254	0.140968	26.6719	26.5502	26.3788	26.6599	26.9961	26.7098	26.5892	26.5896	26.6247	2.80735	10
P0AF25;P0AF24	Ribonucleotide monophosphatase NagD	nagD	0.155875	0.702126	0.492573	1470.73	1652	30.6468	30.5448	30.6779	30.5923	30.874	30.7467	30.4925	30.9721	10	10	10	65.2	65.2	65.2	27.163	0	323.31	49831000000	258	1502.39	1398.87	1535.51	1446.16	1761.5	1611.29	1348.55	1886.67	60.4592	231.516	0.0411083	0.140143	30.9237	30.8218	30.9549	30.8692	31.151	31.0237	30.7694	31.249	30.9393	10.4178	31
P09323	PTS system N-acetylglucosamine-specific EIICBA component	nagE	0.155712	0.499163	0.540295	378.665	428.354	29.9946	30.01	29.9417	30.0883	30.5649	30.0287	30.1296	29.9341	18	18	17	44.3	44.3	41.5	68.346	0	323.31	42959000000	361	374.699	378.769	361.08	400.113	558.618	383.758	411.869	359.171	16.1762	89.4717	0.042719	0.208873	28.9403	28.9557	28.8874	29.034	29.5107	28.9744	29.0754	28.8798	28.9651	10.7879	48
P45395;Q8X9J0;Q8FD73	Arabinose 5-phosphate isomerase KdsD	kdsD	0.155581	0.349336	0.596676	624.117	714.23	29.6573	29.8584	29.7239	29.8153	30.4732	29.7696	29.7625	29.6718	11	11	10	54	54	48.5	35.196	0	323.31	30110000000	191	578.431	665.881	606.067	646.088	1024.16	625.76	622.644	584.353	39.3277	207.479	0.0630134	0.290493	29.5604	29.7615	29.6271	29.7184	30.3764	29.6728	29.6656	29.575	29.6692	7.31288	28
P02918	Penicillin-binding protein 1A	mrcA	0.155506	0.722191	0.489823	100.176	112.422	28.5094	28.633	28.4991	28.6119	28.9695	28.6303	28.5063	28.7692	37	37	37	58.1	58.1	58.1	93.635	0	323.31	25065000000	402	96.3778	105.09	95.6873	103.55	133.013	104.893	96.1716	115.609	4.83403	15.8631	0.0482553	0.141103	27.0009	27.1245	26.9906	27.1034	27.4611	27.1218	26.9979	27.2608	27.1126	5.61471	57
P75849	Hydroxyacylglutathione hydrolase GloC	gloC	0.155503	0.366114	0.588549	902.238	996.821	29.2391	29.8716	29.85	29.8531	29.9096	29.8426	29.602	30.0816	5	5	5	33	33	33	23.784	0	33.052	16259000000	61	641.239	998.547	983.525	985.641	1025.41	978.477	826.759	1156.64	174.126	136.159	0.192994	0.136593	29.7077	30.3403	30.3186	30.3217	30.3782	30.3113	30.0706	30.5502	30.3201	9.5157	5
P39199	Ribosomal protein uL3 glutamine methyltransferase	prmB	0.155262	1.46773	0.412416	867.395	968.618	30.1925	30.1877	30.2501	30.2794	30.5293	30.3072	30.3857	30.3086	9	9	9	36.5	36.5	36.5	35.001	0	323.31	40776000000	210	846.125	843.269	880.964	899.223	1071.18	916.859	968.668	917.764	27.2741	72.5368	0.0314437	0.0748869	30.1037	30.0988	30.1613	30.1906	30.4405	30.2184	30.2969	30.2198	30.2045	10.4512	26
B7UPM7;Q8X5U9;Q8FB02;P0A698	UvrABC system protein A	uvrA	0.155209	1.10813	0.438063	109.26	122.097	28.779	28.9015	28.7847	28.8839	29.1454	28.8688	29.0572	28.8986	39	39	39	50.5	50.5	50.5	103.88	0	323.31	50657000000	552	104.813	114.197	105.231	112.8	135.462	111.611	127.349	113.967	4.93005	11.2879	0.0451221	0.0924502	27.1208	27.2432	27.1264	27.2257	27.4871	27.2105	27.3989	27.2403	27.233	7.83289	68
P0A922;P0A921	Phospholipase A1	pldA	0.155182	0.660079	0.50365	231.882	260.881	28.2899	28.2861	28.2598	28.2268	28.7127	28.4252	28.1688	28.3765	15	15	15	76.5	76.5	76.5	33.163	0	323.31	15195000000	179	235.813	235.189	230.9	225.624	317.05	259.254	216.652	250.567	4.70847	41.7142	0.0203055	0.159897	28.2789	28.2751	28.2488	28.2158	28.7017	28.4142	28.1578	28.3656	28.277	5.20945	16
P0AG19;P0AG18	N5-carboxyaminoimidazole ribonucleotide mutase	purE	0.155042	0.684466	0.498299	509.488	570.108	28.5506	28.4621	28.3331	28.6031	28.8956	28.5646	28.6455	28.4633	4	4	4	53.3	53.3	53.3	17.78	0	308.49	5426700000	54	531.252	499.351	456.211	551.139	676.407	536.493	567.758	499.774	41.4317	76.118	0.0813202	0.133515	29.4389	29.3505	29.2214	29.4914	29.7839	29.4529	29.5338	29.3517	29.4459	9.48985	6
A1A890;B1XF08;B7MD78;C4ZTH7;P77488;Q1RFC0;B7M3Q9;B7UJP3;B7NJ77;B7N8X3;B7MQD5;Q8FKB9;Q0TKM1;B1J029;A7ZX72;A7ZIH3;B6HZM1;B1LJH0;B5Z3S5;Q8XE76	1-deoxy-D-xylulose-5-phosphate synthase	dxs	0.154926	0.570661	0.522879	367.204	412.816	29.961	29.8204	29.9574	30.0514	30.3951	30.0272	29.8328	30.1547	20	20	2	41.1	41.1	4.5	67.602	0	323.31	52212000000	358	370.066	335.362	369.137	394.251	501.506	387.63	338.303	423.825	24.203	68.7351	0.0659116	0.166503	28.9225	28.7819	28.9189	29.0129	29.3566	28.9887	28.7944	29.1163	28.9556	9.44501	48
P0ACK4;P0ACK3;P0ACK2	Putative aga operon transcriptional repressor	agaR	0.154905	1.11833	0.437982	136.262	151.889	27.3016	27.2836	27.28	27.4886	27.632	27.495	27.3815	27.4651	7	7	7	35.3	35.3	35.3	29.572	0	78.229	4486700000	63	132.543	130.876	130.552	151.079	167.036	151.752	140.16	148.608	9.91648	11.2216	0.0727749	0.0738805	27.456	27.4379	27.4344	27.643	27.7864	27.6493	27.5358	27.6194	27.5776	5.72792	11
P05707	Sorbitol-6-phosphate 2-dehydrogenase	srlD	0.154852	0.144696	0.73849	243.63	295.65	28.4234	28.0148	27.7443	28.0745	29.0571	28.2393	27.206	28.374	7	7	7	35.5	35.5	35.5	27.858	0	149.07	7913000000	68	308.778	231.956	191.934	241.85	481.218	271.436	131.665	298.281	48.498	143.666	0.199064	0.485933	28.6639	28.2553	27.9848	28.315	29.2976	28.4798	27.4465	28.6145	28.3974	8.48382	9
P71298	Prophage integrase IntF	intF	0.154706	0.541637	0.529094	117.858	132.643	28.0992	27.9965	27.8628	27.9418	28.495	27.9634	28.017	28.0438	12	12	12	35.4	35.4	35.4	53.073	0	123.92	6600600000	89	128.328	119.419	108.752	114.933	169.296	116.685	121.149	123.442	8.23657	24.596	0.0698855	0.18543	27.4098	27.3071	27.1734	27.2524	27.8056	27.274	27.3276	27.3544	27.3174	2	11
Q1R8B7;B7N6J4;B5Z227;A1AED9;P0A7X8;P0A7X7;P0A7X6;C4ZYM6;B7UH57;B7NSA7;B7MYA1;Q0TEN1;B7MIU6;B7M977;B7LDJ7;B6I630;B1XBT0;B1IVM5;A8A3B5;A7ZQ48;B1LPB5	Ribosome maturation factor RimM	rimM	0.154105	0.435137	0.564026	2691.35	3024.17	31.0615	30.8491	31.2221	31.1628	31.5443	31.3594	31.0319	30.9763	12	12	12	74.2	74.2	74.2	20.605	0	323.31	69714000000	250	2655.25	2288.35	2971.28	2850.54	3723.29	3271.08	2600.81	2501.51	298.56	577.967	0.110933	0.191116	31.7371	31.5247	31.8977	31.8385	32.2199	32.035	31.7075	31.6519	31.7878	10.7194	27
P13518	RNase E specificity factor CsrD	csrD	0.154035	0.41084	0.573355	130.667	143.222	28.2337	28.9506	28.671	28.4069	28.8561	28.7428	28.6034	28.6762	9	9	9	15.5	15.5	15.5	73.338	0	35.774	4543900000	53	101.703	168.008	138.14	114.818	157.249	145.251	131.752	138.636	29.0991	10.8549	0.222696	0.0757908	27.0777	27.7947	27.5151	27.251	27.7001	27.5868	27.4475	27.5202	27.5176		11
Q1RE78;Q0TJK1;P60871;P60870;P60869;C4ZY19;B7UMT9;B7NNT0;B7NAJ3;B7MQV0;B7MGV4;B7M7C2;B7LD40;B6I8G8;B5YSD8;B1X7Y8;B1LMZ9;B1IWS5;A7ZYF0;A7ZJR5;A1A986	Putative transport protein YbjL	ybjL	0.153895	0.345775	0.600224	100.099	112.257	27.6763	28.2314	27.8749	27.8792	28.3606	27.7988	28.3033	27.8147	7	7	7	17.6	17.6	17.6	60.35	0	179.8	5005600000	60	83.819	123.637	96.3252	96.6136	135.335	91.3259	130.018	92.3496	16.7874	23.6818	0.167708	0.21096	26.8015	27.3567	27.0001	27.0044	27.4858	26.924	27.4285	26.9399	27.0023		6
P39410	Toxin YjjJ	yjjJ	0.153749	0.535856	0.53216	42.3757	47.5403	26.2412	26.5248	26.4499	26.4628	26.8126	26.4546	26.304	26.7225	8	8	8	23.7	23.7	23.7	49.756	0	38.785	1707500000	53	37.2951	45.4872	43.1645	43.5561	55.6429	43.3073	38.9715	52.2393	3.53598	7.72603	0.0834435	0.162516	25.6449	25.9285	25.8536	25.8666	26.2163	25.8584	25.7077	26.1262	25.8625		7
P0AED9;P0AEE0	DNA-cytosine methyltransferase	dcm	0.153263	0.558054	0.52714	60.2992	67.2341	26.9343	27.2063	27.1213	26.832	27.4496	27.1508	27.0962	27.0103	15	15	14	35.8	35.8	31.6	53.464	0	108.48	6095700000	131	56.3466	68.1685	64.23	52.4515	80.8262	65.5723	63.1102	59.4277	7.17836	9.4066	0.119046	0.139908	26.2343	26.5063	26.4213	26.132	26.7496	26.4509	26.3962	26.3103	26.4088	4.90689	22
B1XC35;C5A130;P02943;A7ZUQ8;A8A7D6;B1IUL5;B1LPK1;B7M7U8;B7NFY0;B7NS00;B7UPJ7;B5Z177;Q8CVI4;Q1R3Q0;Q0TA25;B6I5Q0;B7N2P4;B7MJ27;B7LAY3;Q8X5W7;A1AIL4	Maltoporin	lamB	0.153173	0.273477	0.641577	2498.79	2854.08	32.4814	32.0404	32.1925	32.2546	32.8594	32.4153	31.8297	32.4773	21	21	20	64.8	64.8	64.6	49.912	0	323.31	293950000000	903	2936.04	2155.94	2398.3	2504.89	3825.53	2803.06	1860.26	2927.48	326.021	804.025	0.130471	0.28171	31.8807	31.4396	31.5917	31.6538	32.2586	31.8145	31.2289	31.8765	31.7341	11.336	131
P0A906;P0A905	Outer membrane lipoprotein SlyB	slyB	0.153135	0.606463	0.521144	8887.23	9827.09	32.1792	32.2515	32.6662	32.3957	32.4638	32.5359	32.6696	32.4358	8	8	8	70.3	70.3	70.3	15.601	0	323.31	138390000000	359	7691.44	8090.97	10816.4	8950.07	9387.28	9873.73	10842	9205.3	1389.21	733.115	0.156315	0.0746014	33.2561	33.3285	33.7431	33.4726	33.5407	33.6129	33.7465	33.5128	33.5268	14.0751	47
P75818	Uncharacterized lipoprotein YbjP	ybjP	0.153096	0.594001	0.521659	714.009	790.6	29.1814	29.1877	28.7423	29.1153	29.2785	29.1455	29.0781	29.3369	6	6	6	50.9	50.9	50.9	18.991	0	174	15281000000	88	773.059	776.46	568.45	738.066	827.437	753.875	719.106	861.983	98.5786	65.6062	0.138064	0.0829828	29.9747	29.981	29.5356	29.9085	30.0718	29.9388	29.8714	30.1302	29.9567	10.1972	16
P32134	Uncharacterized protein YihM	yihM	0.152978	0.405881	0.577328	162.797	184.946	27.8883	27.8755	27.9247	27.9745	28.531	28.017	27.7521	27.975	14	14	14	52.1	52.1	52.1	36.941	0	100.5	6089900000	79	159.64	158.219	163.762	169.568	250.358	174.686	145.115	169.626	5.08919	45.4798	0.0312609	0.245908	27.7217	27.7089	27.7581	27.8079	28.3644	27.8503	27.5854	27.8084	27.783	4.52356	12
P21693	ATP-dependent RNA helicase DbpA	dbpA	0.152908	0.277988	0.639855	71.7883	82.9963	27.1707	27.228	27.2034	27.0293	27.9562	27.162	26.9252	27.1997	7	7	7	18.6	18.6	18.6	49.187	0	28.139	3549800000	65	72.3349	75.2953	74.0085	65.5144	125.363	71.8951	60.9118	73.815	4.35464	28.811	0.0606595	0.347136	26.591	26.6483	26.6237	26.4496	27.3765	26.5823	26.3456	26.62	26.6055	4.80736	9
P28249	Protein AsmA	asmA	0.152623	0.538696	0.534085	67.9661	76.6242	27.5279	27.5926	27.5674	27.5883	28.1085	27.5692	27.6491	27.5599	17	17	17	35	35	35	68.962	0	323.31	9632000000	187	66.0256	69.0863	67.8766	68.8762	99.1401	67.9626	71.873	67.5211	1.39721	15.1375	0.0205575	0.197555	26.4607	26.5254	26.5002	26.5211	27.0413	26.502	26.5819	26.4927	26.5115	5.35755	30
Q47622	Probable ABC transporter periplasmic-binding protein SapA	sapA	0.152486	0.580324	0.524667	158.477	178.145	28.61	28.5648	28.6765	28.6054	28.9509	28.666	28.4711	28.9787	24	24	23	60.5	60.5	57.4	61.564	0	197.69	16685000000	181	157.947	153.033	165.484	157.444	200.532	164.265	143.316	204.468	5.16661	29.4381	0.0326016	0.165248	27.7065	27.6613	27.773	27.7019	28.0474	27.7625	27.5676	28.0752	27.7345	5.39232	22
P37659	Cellulose biosynthesis protein BcsG	bcsG	0.152081	0.34512	0.603597	47.3981	54.1622	26.8254	26.882	26.9695	26.9258	27.6094	26.8552	26.8283	26.9182	5	5	5	15.4	15.4	15.4	62.031	0	24.984	2052900000	30	44.9336	46.7506	49.7028	48.2055	77.7936	45.8803	45.0252	47.9497	2.03772	15.802	0.0429916	0.291754	25.911	25.9676	26.0551	26.0114	26.695	25.9408	25.9139	26.0038	25.9857	5.24793	5
P0ABU3;P0ABU2	Ribosome-binding ATPase YchF	ychF	0.15169	0.810527	0.485912	3611.17	4039.73	32.3994	32.4803	32.4296	32.4716	32.8295	32.652	32.4258	32.4806	21	21	21	72.7	72.7	72.7	39.667	0	323.31	252030000000	663	3496.18	3700.03	3570.89	3677.59	4724.54	4172.44	3561.35	3700.6	95.1354	526.126	0.0263447	0.130238	32.13	32.211	32.1602	32.2023	32.5601	32.3826	32.1564	32.2112	32.2066	12.1209	75
P12758	Uridine phosphorylase	udp	0.150756	0.816289	0.486991	7849.82	8746.29	32.8589	33.0877	33.0166	33.0585	33.3837	33.0773	33.1094	33.0543	17	17	17	92.5	92.5	92.5	27.159	0	323.31	503610000000	1201	7071.17	8299.65	7896.55	8131.92	10210.8	8239.44	8426.71	8108.16	544.794	985.083	0.069402	0.112629	33.1361	33.3648	33.2937	33.3357	33.6608	33.3544	33.3865	33.3315	33.3451	14.7469	153
P0ABQ3;P0ABQ2	2-hydroxy-3-oxopropionate reductase	garR	0.149626	0.548355	0.539822	236.224	264.763	28.2813	28.1889	28.0724	28.1213	28.6625	28.2705	28.1466	28.1827	11	11	11	59.2	59.2	59.2	30.427	0	214.02	8479500000	109	255.698	239.686	220.91	228.603	333.926	253.782	232.693	238.649	15.0975	46.9557	0.0639119	0.17735	28.3945	28.3022	28.1856	28.2345	28.7757	28.3838	28.2599	28.296	28.2991	9.58872	11
P0AAC2;P0AAC1;P0AAC0	Universal stress protein E	uspE	0.149568	0.9314	0.478976	1100.95	1217.72	30.4374	30.493	30.6575	30.7759	30.8112	30.7449	30.6862	30.7196	15	15	15	67.4	67.4	67.4	35.706	0	323.31	47090000000	326	984.359	1023.41	1148.4	1247.62	1278.87	1220.88	1171.69	1199.44	120.234	45.4706	0.10921	0.0373408	30.3198	30.3754	30.54	30.6583	30.6937	30.6274	30.5686	30.6021	30.5853	10.6751	45
P37767	Uncharacterized HTH-type transcriptional regulator YfhH	yfhH	0.149484	0.20286	0.690414	61.9438	81.7796	26.0323	26.4437	26.1789	26.3859	26.8301	26.1604	25.7494	26.8987	4	4	4	23.8	23.8	23.8	30.707	0	75.949	1349200000	30	52.464	69.9766	58.1339	67.2009	91.7194	57.3873		96.2322	8.09413	21.2445	0.130669	0.259778	26.1323	26.5437	26.2789	26.4859	26.9302	26.2604		26.9988	26.4859	6.04439	3
P0AD29;P0AD28;P0AD27	Inner membrane protein YejM	yejM	0.149413	1.12553	0.453924	88.6428	98.367	28.0079	27.9618	27.9076	27.7646	28.1023	28.0156	28.1625	27.9591	14	14	14	37.2	37.2	37.2	67.295	0	242.66	7534300000	96	94.7069	91.702	88.2867	79.8754	101.181	95.2241	105.534	91.5282	6.40638	6.2166	0.0722719	0.063198	26.9759	26.9299	26.8757	26.7327	27.0704	26.9837	27.1305	26.9272	26.9529	5.52356	10
P77804	Protein YdgA	ydgA	0.148391	0.528543	0.548747	577.211	648.03	30.3369	30.294	30.2429	30.2849	30.7441	30.3362	30.1456	30.5263	34	34	33	86.5	86.5	86.3	54.688	0	323.31	118690000000	735	596.465	578.787	558.45	575.144	793.247	596.156	521.702	681.016	15.5934	116.656	0.027015	0.180016	29.6043	29.5613	29.5102	29.5523	30.0115	29.6035	29.413	29.7936	29.5824	11.1402	95
P0A9V3;P0A9V2;P0A9V1	Lipopolysaccharide export system ATP-binding protein LptB	lptB	0.148297	0.332091	0.618837	613.258	686.36	29.5443	29.2006	29.4884	29.1096	29.5478	29.7119	29.6544	29.022	14	14	13	66.4	66.4	65.1	26.8	0	268.19	31321000000	314	703.819	553.277	676.791	519.144	705.531	791.466	760.193	488.25	90.7246	136.765	0.147939	0.199261	29.8407	29.4969	29.7847	29.406	29.8441	30.0083	29.9507	29.3184	29.8127	11.058	29
Q1RAS6;Q0TGX4;P0A9X3;P0A9X2;P0A9X1;A1AC19	Zinc import ATP-binding protein ZnuC	znuC	0.146923	0.763795	0.504515	117.829	130.615	27.0892	27.1751	26.8595	27.0495	27.1514	27.2077	27.0388	27.363	7	7	7	31.9	31.9	31.9	27.867	0	26.177	3500300000	85	121.287	128.806	103.265	117.958	126.685	131.777	117.083	146.916	10.7172	12.4585	0.0909557	0.0953833	27.3292	27.4152	27.0995	27.2895	27.3914	27.4477	27.2789	27.6031	27.3603	5.85798	7
P0ACB0;Q8FB22;Q8X5V3	Replicative DNA helicase	dnaB	0.14643	0.952019	0.483224	223.868	249.14	28.8502	28.8924	28.8873	28.871	29.211	29.086	28.8743	28.9153	25	25	25	73	73	73	52.389	0	323.31	31698000000	279	219.961	226.57	225.751	223.189	283.176	259.452	223.713	230.22	2.97602	27.5033	0.0132937	0.110393	28.1795	28.2218	28.2166	28.2003	28.5403	28.4153	28.2036	28.2446	28.2192	8.32193	37
Q1RB83;Q0THB6;P0A6X9;P0A6X8;P0A6X7;C4ZYH4;B7US95;B7NT64;B7N550;B7MVJ1;B7MAS3;B7M1C1;B7L6I5;B6I8Q5;B5YQ00;B1XG19;B1LE18;B1IPL5;A8A0Q4;A7ZMI0	Integration host factor subunit alpha	ihfA	0.145234	0.26401	0.660103	3075.39	3529.6	30.4331	30.3351	30.5397	30.3275	31.1726	30.5512	30.169	30.3236	8	8	8	61.6	61.6	61.6	11.354	0	56.536	25799000000	163	3122.27	2915.23	3364.27	2899.8	5239.96	3391.49	2595.19	2891.77	217.667	1186.64	0.070777	0.336197	31.9685	31.8705	32.0751	31.8629	32.708	32.0866	31.7044	31.859	31.9195	12.2318	19
P0A6J8;P0A6J9;Q8FKE3	D-alanine--D-alanine ligase A	ddlA	0.145186	0.534274	0.555818	965.217	1078.61	30.6536	30.5229	30.5542	30.4551	31.0223	30.6429	30.4561	30.6452	21	21	21	82.7	82.7	82.7	39.315	0	323.31	98932000000	502	1039.11	948.242	969.224	904.293	1345.18	1031.34	904.914	1033.02	56.2019	187.566	0.0582272	0.173896	30.3971	30.2664	30.2977	30.1986	30.7659	30.3864	30.1996	30.3887	30.342	9.80896	64
A7ZTG3;B7M496;P0AG88;P0AG87;C4ZXK1;B7NPB8;B7NER6;P0AG86;B7L735;B5YWB1;B1X943;B1LK48;A8A674;Q0TBJ7;A1AHE6;B1IZI1;B6I3I8;B7MFH3;B7N255;B7ULG5;Q1R4Y5	Protein-export protein SecB	secB	0.144857	0.702167	0.520538	11295.1	12544.9	32.9882	32.8443	32.9145	32.7424	32.9859	32.8724	32.9469	33.2637	7	7	7	64.5	64.5	64.5	17.277	0	323.31	185190000000	321	12225	11053.4	11610.1	10291.8	12204.9	11272.5	11876.4	14826	822.391	1568.98	0.0728097	0.125069	33.918	33.7741	33.8443	33.6721	33.9156	33.8021	33.8766	34.1935	33.8605	14.7685	53
P0ABC5;P0ABC4;P0ABC3	Modulator of FtsH protease HflC	hflC	0.144397	0.673149	0.525503	1697.21	1877.02	31.0872	31.3769	31.256	31.4241	31.5883	31.2447	31.4653	31.4235	20	20	20	59.9	59.9	59.9	37.649	0	323.31	97849000000	592	1470.62	1801.29	1655.14	1861.79	2088.68	1642.04	1916.3	1861.07	174.195	184.221	0.102636	0.0981453	30.8932	31.1829	31.062	31.23	31.3943	31.0507	31.2713	31.2295	31.2062	11.0553	73
A8A5M7;B1IP47;B1X764;C4ZVX0;P06993;A7ZSU8;B5YTW9;Q8X701;B7NE23;B7M2H9;B7L4U8;B6I2Y2;B7NMI3;B7UKC3;B1LI79;Q1R5L6;B7MDP4;A1AGU2;Q8CXX5;Q0TC49;B7N1J6	HTH-type transcriptional regulator MalT	malT	0.144259	0.502414	0.563393	433.03	483.854	30.6751	30.7841	30.8081	30.902	31.2904	30.8956	30.7284	30.8318	34	34	34	44.8	44.8	44.8	103.12	0	323.31	43531000000	378	398.263	429.859	437.14	466.858	612.757	464.767	413.423	444.466	28.1663	88.4916	0.0650448	0.182889	29.0274	29.1364	29.1604	29.2544	29.6428	29.248	29.0808	29.1842	29.1723	6.22882	54
P0A9Q8;P0A9Q7	Bifunctional aldehyde-alcohol dehydrogenase AdhE	adhE	0.14362	0.704089	0.522632	3238.36	3579.84	33.3943	33.7447	33.5383	33.5686	33.6241	33.6184	33.9067	33.6713	64	64	64	76.4	76.4	76.4	96.126	0	323.31	1898500000000	4021	2869.64	3667.58	3174.05	3242.15	3370.45	3357.07	4107.97	3483.89	328.804	356.65	0.101534	0.0996272	31.848	32.1984	31.992	32.0223	32.0777	32.0721	32.3604	32.125	32.0749	12.4178	440
Q8X6V3;P75801	Probable diguanylate cyclase DgcI	dgcI	0.143526	0.517232	0.563397	73.2594	81.8268	27.1948	27.2177	27.3053	27.1113	27.7017	27.2654	27.2917	27.1444	13	13	9	29.9	29.9	24.9	49.876	0	29.307	4212300000	98	72.5372	73.7107	78.3725	68.4172	103.444	76.2107	77.6282	70.0242	4.09538	14.785	0.0559025	0.180686	26.595	26.618	26.7055	26.5115	27.102	26.6656	26.6919	26.5447	26.6418		8
A7ZHS0;Q0TLF3;P0A6Q8;P0A6Q7;P0A6Q6;C4ZRS2;B7UJ81;B7NIE2;B7N847;B7MP40;B7MBG1;B7M1Y3;B7LGP2;B6HZF4;B5Z0F9;B1XD49;B1LGY2;B1IQG1;A7ZWC6	3-hydroxyacyl-[acyl-carrier-protein] dehydratase FabZ	fabZ	0.143517	0.656136	0.528913	9115.61	10105.9	32.5326	32.4363	32.7156	32.494	32.8749	32.6492	32.4704	32.758	13	13	12	73.5	73.5	72.2	17.033	0	312.71	218180000000	562	9014.22	8427.01	10246.9	8774.35	11455.7	9781.6	8630.62	10555.7	791.76	1198.06	0.0868576	0.11855	33.4828	33.3866	33.6659	33.4443	33.8252	33.5995	33.4207	33.7083	33.5412	13.1553	88
P04805;B6I6U7;B1X9R9;B1IX65;A8A2Q2;A7ZPK7;Q8XBN2;B5YZV2;Q8FFC9;Q1R8W9;A1ADS2;Q0TF64;B1LMJ5	Glutamate--tRNA ligase	gltX	0.143106	1.86653	0.427343	2637.17	2914.92	32.3842	32.5169	32.3977	32.4444	32.6457	32.6048	32.5473	32.5178	35	35	35	79.6	79.6	79.6	53.815	0	323.31	448080000000	1348	2541.91	2789.31	2566.05	2651.41	3052.65	2966.43	2849.34	2791.25	111.78	117.215	0.0423865	0.0402122	31.6748	31.8074	31.6883	31.735	31.9363	31.8954	31.8378	31.8084	31.8079	12.0825	167
P0A9F5;P0A9F4;P0A9F3	HTH-type transcriptional regulator CysB	cysB	0.142644	0.686266	0.525258	609.329	677.01	29.7043	29.8729	29.7414	29.7564	30.128	29.8514	29.687	29.9792	17	17	17	65.1	65.1	65.1	36.15	0	323.31	44694000000	262	581.855	654.767	597.192	603.501	782.836	644.976	574.85	705.378	31.6267	88.4435	0.0519042	0.130638	29.5689	29.7375	29.606	29.621	29.9926	29.716	29.5516	29.8438	29.6685	9.27612	29
A7ZPJ8;B7LCE0;P0A6V9;C4ZVS5;B7N5Y9;B7M6Q8;P0A6V8;B6I6T9;B5YZU2;B1X9R0;B1IX74;A8A2P2;A1ADR4;B7MH48;B7MY46;B7UG97;Q0TF72;Q1R8X8;Q8FFD4;B1LMI6;B7NPS4	Glucokinase	glk	0.142385	0.560027	0.555777	1249.32	1389.71	30.6579	30.8405	30.7965	30.6452	31.1165	30.7482	30.6491	30.9959	25	25	25	71	71	71	34.723	0	323.31	86755000000	523	1181.52	1342.68	1301.98	1171.1	1628.93	1258.62	1174.27	1497.03	86.0312	210.034	0.0688624	0.151135	30.5806	30.7632	30.7192	30.5679	31.0392	30.6709	30.5718	30.9186	30.695	9.25267	70
Q8XDS0;P0AC39;P0AC38	Aspartate ammonia-lyase	aspA	0.142162	0.605184	0.544541	2300.17	2525.36	32.0073	32.4771	32.1656	32.113	32.4471	32.2315	32.3625	32.2906	24	24	24	56.9	56.9	56.9	52.356	0	323.31	336430000000	776	2007.38	2789.18	2242.56	2161.54	2731.13	2348.52	2574.05	2447.75	340.289	165.336	0.147941	0.0654704	31.3376	31.8074	31.4958	31.4433	31.7773	31.5618	31.6927	31.6209	31.5913	12.4455	95
P64484;P64483	Multifunctional Ser/Thr-tRNA deacylase ProXp-y	proXp-y	0.141444	0.497929	0.572771	436.819	487.156	28.3538	28.1658	28.2759	28.3048	28.6575	28.1781	28.6	28.2305	4	4	4	37.7	37.7	37.7	17.85	0	48.601	5641900000	73	461.03	404.17	436.574	445.501	570.3	407.669	547.758	422.897	23.997	83.7315	0.0549358	0.171878	29.2364	29.0484	29.1586	29.1875	29.5402	29.0607	29.4826	29.1131	29.173	9.13443	10
P0AEG5;P0AEG4;P0A4L6;P0A4L5	Thiol:disulfide interchange protein DsbA	dsbA	0.141313	0.427875	0.592939	1968.35	2178.04	30.9185	30.5412	30.9652	30.7328	31.1878	30.7441	30.7483	31.0427	12	12	12	60.6	60.6	60.6	23.104	0	323.31	80935000000	503	2140.06	1643.19	2211.11	1879.06	2584.09	1894.07	1899.59	2334.4	259.562	340.344	0.131868	0.156262	31.429	31.0517	31.4757	31.2432	31.6983	31.2546	31.2588	31.5531	31.3439	12.0088	64
P15043	ATP-dependent DNA helicase RecQ	recQ	0.141178	0.235011	0.680934	19.0435	22.1962	25.9205	25.6322	26.0371	25.2416	26.2385	25.6067	25.5417	26.0092	5	5	5	13.5	13.5	13.5	68.363	0	32.285	817580000	22	21.6157	17.6649	23.4553	13.438	27.0073		16.58	23.0014	4.4498	5.26009	0.233665	0.236981	24.8659	24.5776	24.9825	24.187	25.1839		24.487	24.9546	24.8659		1
P37691	Uncharacterized protein YibQ	yibQ	0.140975	0.123243	0.765878	112.263	92.6048	27.1697	25.6473	27.3663	27.4183	27.0901	27.1446	26.8185	27.1122	9	9	9	39.2	39.2	39.2	35.352	0	52.384	3295700000	37	100.906		115.796	120.089	95.4384	99.1498	78.9083	96.9226	10.0678	9.25752	0.08968	0.0999681	27.0665		27.2631	27.3151	26.9869	27.0414	26.7153	27.009	27.0414	6.24793	8
B1X998;B7NEX9;C4ZXQ7;P31441;Q7A9L5;A8A6C8;B1IYS4;B7L789;B7M4F2;B1LKZ0;B5YX72;Q0TB37;Q8FBX7;B7N1X4;A7ZTM0;B6I3P6;B7NQW3;Q1R4R6;A1AHK5;B7MFN5	Adenine deaminase	ade	0.140821	0.663324	0.533944	142.417	156.799	28.4492	28.7243	28.3295	28.5167	28.8249	28.5974	28.5838	28.5769	15	15	15	36.4	36.4	36.4	63.739	0	323.31	17007000000	204	136.269	165.214	125.319	142.867	177.276	151.165	149.737	149.018	16.8332	13.6802	0.118196	0.087247	27.4956	27.7707	27.376	27.5631	27.8713	27.6438	27.6302	27.6233	27.6268	5.75489	24
P76403	tRNA hydroxylation protein P	trhP	0.140542	0.679832	0.532397	1021.17	1129.7	31.1314	31.062	30.9598	30.8716	31.3577	31.1785	31.0785	30.9723	29	29	29	77	77	77	51.193	0	323.31	114980000000	603	1112.09	1059.34	986.145	927.109	1303.02	1149.34	1071.6	994.828	81.2359	131.646	0.0795517	0.116532	30.4941	30.4247	30.3224	30.2342	30.7204	30.5411	30.4411	30.3349	30.4329	9.41785	82
Q8FBS8;Q1R4J4;Q0TAX1;P0AB99;P0AB98;C4ZZ16;B7UMK3;B7NR40;B7NF54;B7N241;B7MGF8;B7M594;B7L888;B6I3X5;B5YXE2;B1X9W6;B1LL65;B1IX00;A8A6K1;A7ZTV0;A1AHR8	ATP synthase subunit a	atpB	0.14053	0.221868	0.690327	2634.24	2956.26	31.8523	31.1479	31.69	31.6461	32.3301	31.5347	31.4556	31.5781	5	5	5	20.3	20.3	20.3	30.312	0	172.18	36993000000	81	3127.74	1910.03	2791.85	2707.31	4370.29	2504.12	2369.26	2581.36	515.818	946.753	0.195813	0.320254	31.971	31.2666	31.8087	31.7648	32.4488	31.6534	31.5743	31.6968	31.7308	10.8773	11
P0ADG8;P0ADG7	Inosine-5-monophosphate dehydrogenase	guaB	0.140435	0.969798	0.495706	2804.55	3104.35	32.4128	32.4778	32.5223	32.4879	32.7636	32.4311	32.5942	32.6736	26	26	26	76.2	76.2	76.2	52.022	0	323.31	445960000000	1755	2683.61	2808.66	2897.5	2828.43	3430.78	2718.27	3047.14	3221.2	89.171	301.408	0.0317951	0.0970924	31.7523	31.8173	31.8618	31.8273	32.1031	31.7706	31.9337	32.013	31.8446	12.5287	209
P0AGH9;P0AGH8	Phosphate transport system permease protein PstC	pstC	0.140382	0.203452	0.698159	26.92	30.3798	25.5997	25.204	25.1593	24.8654	25.9559	25.3924	24.8828	25.1588	5	5	5	16.3	16.3	16.3	34.121	0	10.311	663750000	26	34.8395	26.4086	25.5963	20.8355	44.7082	30.1331	21.0903	25.5873	5.82387	10.2409	0.21634	0.337095	25.5476	25.1519	25.1073	24.8134	25.9038	25.3403	24.8307	25.1068	25.1296		3
P0ADY2;P0ADY1	Periplasmic chaperone PpiD	ppiD	0.14003	0.886905	0.50627	1329.18	1471.92	31.8082	31.8442	31.7997	31.7414	32.1094	31.9274	31.7384	31.9784	41	41	39	79.5	79.5	79	68.149	0	323.31	259960000000	1168	1337.94	1372.01	1329.96	1276.79	1651.95	1454.36	1274.13	1507.24	39.4003	156.089	0.0296426	0.106044	30.7581	30.7941	30.7496	30.6913	31.0593	30.8773	30.6883	30.9283	30.7761	10.7125	140
P0A9T9;P0A9T8	Uncharacterized ABC transporter ATP-binding protein YbbA	ybbA	0.139423	0.336237	0.632987	108.494	121.821	26.644	26.8822	26.7735	26.6726	26.851	26.9767	26.4453	27.257	5	5	5	29.8	29.8	29.8	24.533	0	35.872	1859500000	41	101.004	119.33	110.592	103.048	116.758	127.499	87.884	155.143	8.31799	27.8087	0.076668	0.228275	27.0679	27.306	27.1974	27.0965	27.2749	27.4006	26.8692	27.6809	27.2362	5.49185	1
P0ACY5;P0ACY4;P0ACY3	Uncharacterized protein YeaG	yeaG	0.13915	0.20844	0.694452	65.9521	74.4351	28.0233	27.4634	27.4653	27.515	28.3123	27.8287	27.2068	27.6758	12	12	12	23.6	23.6	23.6	74.479	0	43.712	3358200000	70	86.4153	58.3904	58.4669	60.5356	105.796	75.4066	48.7864	67.7512	13.6783	23.7135	0.207398	0.31858	26.8451	26.2852	26.2871	26.3367	27.1341	26.6504	26.0285	26.4976	26.4171	8.88264	10
P0ACM7;P0ACM6;P0ACM5	Uncharacterized HTH-type transcriptional regulator YegW	yegW	0.138499	0.761373	0.525211	92.5919	102.56	26.7561	26.6846	26.7685	26.6877	26.8185	26.6803	26.8544	27.0977	6	6	6	28.2	28.2	28.2	28.277	0	24.753	2851300000	53	94.6472	90.0264	95.4738	90.2201	98.8746	89.7564	101.389	120.22	2.87153	12.7903	0.0310128	0.12471	26.975	26.9035	26.9875	26.9066	27.0374	26.8993	27.0733	27.3166	26.9812	6.06609	7
P0AFB9;P0AFB8	DNA-binding transcriptional regulator NtrC	glnG	0.137559	0.422642	0.600622	156.37	170.74	28.1063	28.5539	28.5696	28.139	28.6	28.281	28.5132	28.5248	16	16	15	37.7	37.7	36	52.254	0	92.439	10977000000	143	131.005	179.229	181.205	134.042	185.1	148.056	174.19	175.614	27.5755	15.879	0.176348	0.0930009	27.4393	27.887	27.9027	27.4721	27.933	27.6141	27.8463	27.8579	27.8521	6.12928	12
P31550	Thiamine-binding periplasmic protein	thiB	0.13704	0.778693	0.525462	458.221	506.809	29.4122	29.3601	29.3185	29.3621	29.6215	29.5689	29.2487	29.562	12	12	12	50.5	50.5	50.5	36.163	0	323.31	30925000000	217	474.078	457.09	443.975	457.74	548.913	529.04	422.799	526.483	12.3276	56.8967	0.0269031	0.112265	29.2763	29.2242	29.1826	29.2262	29.4856	29.433	29.1128	29.426	29.2512	6.35755	26
B1XF11;B7N8X6;C4ZTI0;P77718;B1J026;B7UJP6;B7NJ74;B1LJH3;B7MQD8;Q8FKB7;Q1RFB7;B7MD81;B7L657;B6HZM6;A7ZIH7;A1A892;A7ZX76;B7M3R2;Q8XE74;B5Z3S9	tRNA sulfurtransferase	thiI	0.137006	1.01964	0.501063	1355.69	1492.38	31.3901	31.4981	31.5532	31.6172	31.5253	31.6556	31.6562	31.7696	36	36	36	77.4	77.4	77.4	54.972	0	323.31	156010000000	786	1240.4	1337.85	1390.39	1454.14	1363.51	1493.74	1494.36	1617.92	90.3827	103.882	0.066669	0.0696081	30.65	30.758	30.8131	30.8771	30.7852	30.9155	30.9161	31.0295	30.8451	9.06878	93
P0AAH6;P0AAH5;P0AAH4	Peptide transport system ATP-binding protein SapD	sapD	0.136776	0.158197	0.7395	57.2071	74.0424	26.6171	26.6546	26.5374	25.8562	27.0918	26.8027	26.5012	25.8167	13	13	13	42.4	42.4	42.4	37.66	0	93.462	1915000000	53	64.2898	65.9997	60.8019	37.7371	89.6396	73.2102	59.2773		13.159	15.1982	0.230023	0.205264	26.4227	26.4601	26.343	25.6617	26.8974	26.6082	26.3067		26.4227	4.58496	10
A1AE52;B7MHZ9;Q1R8L9;Q0TEX1;P60908;P60907;P60906;C4ZX89;B7NRG4;B7MYE9;B7M7L8;B7LCQ4;B5Z0Y3;B1XAY9;B1LNG9;B1IWE7;A8A320;A7ZPV7;B7N6A2;B6I586;B7UGW0	Histidine--tRNA ligase	hisS	0.136681	2.102	0.438634	1295.21	1425.86	31.2395	31.2677	31.1806	31.2177	31.4434	31.3731	31.319	31.3168	24	24	24	66.7	66.7	66.7	47.029	0	323.31	175260000000	681	1306.84	1332.88	1254.05	1287.05	1507.34	1434.93	1381.68	1379.49	33.2404	60.0632	0.0256641	0.0421241	30.7246	30.7527	30.6657	30.7028	30.9284	30.8581	30.8041	30.8018	30.7773	11.4742	92
A1ADT5;B7MY71;Q1R8V2;Q0TF48;P40191;C4ZVU9;Q8FFB5;B7MHS2;B1XA89;B1IX53;A8A2R4;B7UGB9;A7ZPL9;B1LML3;B5YZW5;B6I4Z5;B7LCG3;B7M6S8;B7N609;B7NPV5;Q8XBL0	Pyridoxine/pyridoxal/pyridoxamine kinase	pdxK	0.136432	0.511929	0.57754	224.767	249.318	28.1857	28.0131	28.1908	28.0701	28.5099	28.161	27.9836	28.3509	11	11	11	43.5	43.5	43.5	30.848	0	45.835	9494600000	110	235.851	209.001	236.702	217.514	295.959	231.81	204.731	264.77	13.7414	39.6176	0.0611364	0.158904	28.2791	28.1065	28.2843	28.1635	28.6034	28.2544	28.077	28.4443	28.2668	7.79442	17
Q1RCN4;Q0TIG6;P0A7D3;P0A7D2;P0A7D1;C4ZTP5;B7UQ92;B7NUX0;B7N415;B7MTY8;B7MKA6;B7LXB9;B7LGW4;B6I9R9;B5YXM2;B1XAP5;B1LH96;B1IU89;A7ZZE0;A7ZKX7	Peptidyl-tRNA hydrolase	pth	0.136196	0.226526	0.689977	1278.48	1469.09	29.9431	30.0431	30.1785	30.0278	30.8924	29.9043	29.9439	29.9967	11	11	11	64.4	64.4	64.4	21.082	0	68.519	30297000000	135	1185.74	1271.75	1398.27	1258.17	2304.84	1153.95	1186.43	1231.12	88.3305	558.069	0.0690902	0.379875	30.5857	30.6857	30.8211	30.6703	31.5349	30.5468	30.5865	30.6393	30.6548	10.2143	20
P76578	Alpha-2-macroglobulin	yfhM	0.135341	0.551408	0.572947	18.6355	20.5868	27.0361	27.2768	27.1068	27.0382	27.42	27.4221	27.0567	27.1005	42	42	41	34.7	34.7	34.7	181.58	0	233.62	12728000000	323	17.5981	20.8288	18.4909	17.624	23.0243	23.0593	17.8539	18.4095	1.51997	2.84395	0.0815633	0.138145	24.5722	24.8129	24.6428	24.5743	24.956	24.9582	24.5928	24.6365	24.6397	5.90689	37
P46118	HTH-type transcriptional regulator HexR	hexR	0.135339	0.515105	0.578556	281.649	312.235	28.4718	28.4636	28.4089	28.6115	28.9489	28.4391	28.5132	28.596	11	11	11	57.4	57.4	57.4	31.975	0	231.61	13552000000	158	277.897	276.314	265.933	306.452	388.105	271.609	286.08	303.146	17.3657	52.1967	0.0616574	0.167171	28.5134	28.5053	28.4506	28.6531	28.9905	28.4807	28.5549	28.6376	28.5341	6.55459	19
P0AEZ5;P0AEZ4;P0AEZ3	Septum site-determining protein MinD	minD	0.135268	0.877912	0.521425	3518.69	3882.54	31.9813	31.9563	32.0527	31.9551	32.1838	32.0275	31.9749	32.3003	18	18	18	64.8	64.8	64.8	29.614	0	323.31	118040000000	397	3504.86	3444.07	3684.7	3441.15	4038.84	3620.03	3489.26	4382.02	114.502	407.224	0.032541	0.104886	32.1336	32.1086	32.2051	32.1074	32.3361	32.1798	32.1272	32.4526	32.1567	12.2668	52
P32131	Oxygen-independent coproporphyrinogen III oxidase	hemN	0.135041	0.497381	0.584331	255.694	282.473	28.9421	29.1321	28.9853	29.2208	29.4462	29.2344	28.9302	29.2097	15	15	15	38.3	38.3	38.3	52.728	0	323.31	23434000000	247	233.057	266.231	240.215	283.272	331.698	285.984	231.131	281.081	23.2637	41.1234	0.0909827	0.145583	28.2621	28.4522	28.3053	28.5408	28.7662	28.5544	28.2502	28.5297	28.4909	7.11894	24
P0AFQ9;P0AFQ8;P0AFQ7	Uncharacterized metal-dependent hydrolase YcfH	ycfH	0.134111	0.345322	0.638497	772.915	851.36	29.495	29.8626	29.9725	29.947	30.2482	29.6497	29.8987	30.017	10	10	10	47.9	47.9	47.9	29.808	0	189.04	26394000000	158	610.663	789.894	853.115	837.989	1034.72	680.502	810.102	880.113	111.476	147.585	0.144228	0.173352	29.6379	30.0055	30.1154	30.0899	30.3911	29.7925	30.0415	30.1599	30.0657	6.40939	25
P16095	L-serine dehydratase 1	sdaA	0.133178	0.546457	0.577385	568.767	628.188	30.1642	29.9889	30.2077	30.0601	30.5371	30.1394	30.0868	30.1903	15	14	14	48.7	46.5	46.5	48.906	0	318.87	41642000000	298	591.69	523.33	609.971	550.079	768.219	581.509	560.455	602.568	39.3149	94.9241	0.069123	0.151108	29.5928	29.4175	29.6363	29.4887	29.9657	29.568	29.5154	29.6188	29.5804	6.49185	33
A7ZK49;B6I919;P0A7E1;C4ZQ71;B7M874;B7LE45;P0A7E2;B5YT76;B1X8P9;B1IVY7;A7ZYP7;B1LJR7;B7N3A7;B7NM29;Q1RDR9;A1A9L5;B7MHP7;B7MS56;B7UN24;Q0TJB6;Q8FJ91	Dihydroorotate dehydrogenase (quinone)	pyrD	0.132658	0.692683	0.555627	371.11	408.358	28.9887	29.1957	29.1376	29.0143	29.4168	29.0327	29.2153	29.2021	20	20	20	65.2	65.2	65.2	36.774	0	246.71	39324000000	367	346.526	400.559	384.578	352.776	467.626	357.35	406.088	402.369	25.7497	45.2976	0.0693856	0.110926	28.8286	29.0356	28.9775	28.8542	29.2567	28.8726	29.0552	29.042	29.0065	9.01959	43
B7MIJ0;B7UP63;B5YVS0;B1LIW2;Q1RDB0;A7ZZ05;P67556;P67555;P33136;C4ZRY9;B7NL86;B7MTI1;B1IV53;B7NAS5;Q0TJ25;B7M924;B7LFG0;B6I9C6;A7ZKF2;B1X9G2;A1A9U6	Glucans biosynthesis protein G	mdoG	0.132537	0.631754	0.564406	1069.35	1181.05	31.226	31.3068	31.2761	31.1991	31.6183	31.2348	31.2151	31.47	31	31	31	68.5	68.5	68.5	57.882	0	323.31	167050000000	683	1049.62	1110.68	1087.06	1030.03	1381.36	1056.08	1041.64	1245.1	36.3175	162.563	0.0339623	0.137643	30.4115	30.4922	30.4616	30.3846	30.8038	30.4203	30.4006	30.6554	30.4409	10.3049	83
P30011	Nicotinate-nucleotide pyrophosphorylase [carboxylating]	nadC	0.13252	0.687975	0.555182	267.766	294.932	28.4775	28.5469	28.4432	28.3398	28.8312	28.4818	28.5223	28.5022	14	14	14	60.6	60.6	60.6	32.762	0	185.99	12910000000	179	272.252	285.794	265.792	247.225	348.746	273.067	280.927	276.99	16.0309	36.0187	0.059869	0.122125	28.4841	28.5534	28.4498	28.3464	28.8378	28.4884	28.5289	28.5087	28.4986	9.14975	23
P0ACK8	L-fucose operon activator	fucR	0.132452	0.298616	0.660386	190.767	210.131	27.5502	28.0117	27.4619	27.7512	28.229	27.7509	27.7464	27.5785	6	6	6	34.2	34.2	34.2	27.362	0	33.221	3617700000	68	170.617	235.685	160.378	196.389	274.422	196.345	195.739	174.019	33.5597	44.1007	0.175919	0.209872	27.8167	28.2781	27.7283	28.0176	28.4955	28.0173	28.0129	27.8449	28.0151	6.82018	6
P10443;Q8X8X5;Q8FL05	DNA polymerase III subunit alpha	dnaE	0.131707	0.675624	0.559507	35.4852	38.8973	27.4523	27.7034	27.626	27.4168	27.6899	27.8525	27.6366	27.5464	28	28	27	26.7	26.7	25.3	129.9	0	117.45	11571000000	236	33.0329	39.3816	37.3053	32.2209	39.0103	43.7159	37.5818	35.2811	3.42363	3.56084	0.0964807	0.0915448	25.4716	25.7227	25.6453	25.436	25.7091	25.8718	25.6558	25.5656	25.6506	4.80736	36
P27242	Lipopolysaccharide 1,2-N-acetylglucosaminetransferase	waaU	0.131632	0.567661	0.577559	206.63	228.044	28.5179	28.3271	28.4443	28.4348	28.8108	28.4567	28.3505	28.6328	16	16	16	43.7	43.7	43.7	41.729	0	148.21	16458000000	173	219.335	191.91	208.329	206.946	269.253	210.132	195.083	237.707	11.2707	32.6541	0.0545452	0.143192	28.1754	27.9846	28.1019	28.0924	28.4683	28.1142	28.0081	28.2903	28.108	4	18
P64605;P64604	Intermembrane phospholipid transport system binding protein MlaD	mlaD	0.131306	1.00843	0.520918	2291.19	2513.02	30.8576	30.6593	30.7564	30.8265	31.0125	30.8451	30.7978	30.9697	9	9	9	57.4	57.4	57.4	19.576	0	323.31	55970000000	246	2424.35	2110.03	2258.39	2372	2701.89	2403.21	2324.81	2622.15	139.231	178.011	0.0607678	0.0708358	31.6072	31.4088	31.5059	31.576	31.762	31.5946	31.5473	31.7192	31.5853	10.9009	36
P37908	UPF0053 inner membrane protein YfjD	yfjD	0.131113	0.654547	0.564324	38.6647	42.3508	26.3024	26.3572	26.2585	26.0293	26.2611	26.5098	26.26	26.441	7	7	7	22	22	22	48.044	0	55.879	1829300000	58	40.3303	41.9078	39.1101	33.3105	39.1792	46.6336	39.1501	44.4405	3.74868	3.7865	0.0969538	0.0894079	25.7567	25.8115	25.7128	25.4835	25.7153	25.9641	25.7142	25.8953	25.736		10
P37759;P55293	dTDP-glucose 4,6-dehydratase 1	rfbB	0.130959	0.609955	0.572495	3210.19	3533.54	32.2291	32.2371	32.3303	32.4321	32.656	32.3777	32.2298	32.4889	30	30	26	89.8	89.8	76.7	40.558	0	323.31	284760000000	877	3034.45	3051.33	3257.12	3497.87	4091.35	3367.17	3035.85	3639.78	216.859	446.396	0.0675533	0.126331	31.9277	31.9357	32.0289	32.1307	32.3546	32.0763	31.9284	32.1875	32.0526	11.29	118
A1AG70;B7MB86;Q1R6H3;Q0TCU4;P0ADZ5;P0ADZ4;C4ZSQ6;B7UJ60;B7NKN4;B7NDF1;B7N0V0;B7M073;B7LGI7;B6I1P0;B1XGX7;B1LFR7;B1IQV6;A8A4Y1;A7ZS62;B5YS55;Q8X9M2	Small ribosomal subunit protein uS15	rpsO	0.130044	0.593005	0.576585	49681.2	54548.4	34.2786	34.3354	34.0542	34.2772	34.6097	34.3272	34.2766	34.252	9	9	9	69.7	69.7	69.7	10.269	0	323.31	793470000000	637	51032	53100.1	43612.3	50980.2	64345.4	52798.4	50960.3	50089.7	4164.63	6628.18	0.0838272	0.12151	35.9589	36.0157	35.7345	35.9575	36.29	36.0075	35.9569	35.9323	35.9582	15.8901	92
P39356	Uncharacterized transcriptional regulator YjhU	yjhU	0.130038	1.81579	0.479829	146.866	161.023	27.7146	27.7586	27.73	27.7421	27.9679	27.8638	27.8466	27.7872	13	13	13	49.7	49.7	49.7	36.111	0	127.04	10558000000	173	144.643	149.161	146.208	147.449	172.701	160.565	158.645	152.18	1.91323	8.57193	0.0130271	0.0532343	27.5808	27.6247	27.5962	27.6082	27.834	27.7299	27.7128	27.6533	27.639	3.90689	28
A7ZSR4;B1X736;B6I2U7;B7L4R5;B7M1U1;C4ZUP4;P07639;B7N1G6;Q8FCV7;Q1R5P8;B7UK94;B7NMF2;B7NDZ3;B1LHI4;B7MD00;B5YTT8;Q8X824;B1IP76;A8A5J6;A1AGR6;Q0TC78	3-dehydroquinate synthase	aroB	0.129457	0.588365	0.577451	354.485	390.732	29.141	29.1088	29.0215	29.1292	29.4485	29.2044	28.9704	29.2951	15	15	15	50.6	50.6	50.6	38.863	0	276.27	24767000000	268	364.593	356.445	335.325	361.575	452.159	381.12	323.528	406.122	13.2086	53.6	0.0372613	0.137178	28.9012	28.869	28.7817	28.8894	29.2087	28.9646	28.7306	29.0553	28.8953	7.9542	39
P31060	ABC transporter ATP-binding protein ModF	modF	0.129197	0.354052	0.641391	31.3607	36.7801	26.2494	26.3131	25.8753	26.0234	26.4677	26.3935	25.9319	26.1849	9	9	8	21.2	21.2	19	54.535	0	25.964	1285600000	38	34.1923	35.7508	26.312	29.1877	39.8383	37.8205		32.6816	4.37805	3.69002	0.139603	0.100326	25.5208	25.5845	25.1467	25.2948	25.7391	25.6649		25.4563	25.5208	5.72792	5
P07003	Pyruvate dehydrogenase [ubiquinone]	poxB	0.128584	0.189004	0.724967	34.4776	39.232	26.6849	26.4764	26.1556	26.4203	27.2813	26.4495	26.2832	26.2376	14	14	14	31.8	31.8	31.8	62.011	0	113.07	3058400000	75	40.7353	35.2041	28.1223	33.8486	61.8478	34.5465	30.7493	29.7845	5.17919	15.2167	0.150219	0.387863	25.7709	25.5625	25.2417	25.5064	26.3673	25.5356	25.3693	25.3237	25.521	7.40939	10
P21367	Probable hydrolase YcaC	ycaC	0.128582	0.50722	0.598183	135.613	148.64	27.141	26.87	27.0533	26.8241	27.3236	27.0289	27.1442	26.906	6	6	6	43.8	43.8	43.8	23.1	0	48.65	3819300000	67	152.008	125.733	142.954	121.757	172.74	140.528	152.35	128.943	14.2863	18.6936	0.105346	0.125764	27.6517	27.3807	27.564	27.3348	27.8343	27.5396	27.6549	27.4167	27.5518	9.9629	9
P38489	Oxygen-insensitive NAD(P)H nitroreductase	nfsB	0.128004	0.362678	0.641369	3541.01	3935.83	31.7423	31.6581	31.7291	31.6146	32.2046	31.7219	31.4872	31.8424	17	17	17	71	71	71	23.905	0	279.92	146160000000	426	3680.78	3470.23	3646.94	3366.09	5087.87	3628.73	3078.73	3948	148.734	847.796	0.0420033	0.215404	32.2035	32.1194	32.1904	32.0759	32.6659	32.1832	31.9484	32.3036	32.1868	10.9937	60
P25516	Aconitate hydratase A	acnA	0.127419	0.302412	0.665568	115.203	126.967	29.0907	28.7598	28.6079	28.7985	29.3136	28.9614	28.6083	28.8833	25	25	25	38.8	38.8	38.8	97.676	0	323.31	20042000000	229	138.744	110.052	98.9453	113.07	162.173	126.734	98.9771	119.986	16.8285	26.2784	0.146077	0.206969	27.5213	27.1904	27.0385	27.2291	27.7442	27.392	27.0389	27.3138	27.2715	9.92926	31
Q1R383;Q0T9L6;P0A7D6;P0A7D5;P0A7D4;C4ZR54;B7UQI6;B7NTN3;B7NGB1;B7MSJ5;B7MKY1;B7M8T7;B7LC36;B6I281;B5Z2I3;B1XDS8;B1LQJ7;B1IT29;A8A7S2;A7ZV47;A1AJ82	Adenylosuccinate synthetase	purA	0.127304	0.687075	0.56763	4613.09	5068.05	32.9816	33.094	33.0256	33.0979	33.4264	33.0428	33.129	33.11	32	32	32	75.2	75.2	75.2	47.344	0	323.31	616520000000	1176	4395.45	4755.4	4533.06	4768.44	6001.63	4588.11	4873.51	4808.97	180.883	634.266	0.0392108	0.12515	32.457	32.5694	32.501	32.5733	32.9018	32.5183	32.6044	32.5854	32.5714	13.6851	154
P0AG98;P0AG97;P0AG96	Protein translocase subunit SecE	secE	0.12675	0.177742	0.732591	698.141	803.143	28.6816	28.3775	28.5737	28.5851	29.3303	28.9127	28.157	28.3249	6	6	6	24.4	24.4	24.4	13.643	0	10.819	7237100000	55	760.875	614.988	705.521	711.18	1198.29	894.551	527.003	592.722	60.7575	308.237	0.0870276	0.383789	29.952	29.648	29.8441	29.8555	30.6007	30.1832	29.4275	29.5953	29.8498	8.18487	6
Q8FJ81;Q1RDQ8;Q0TJA5;P0A8N1;P0A8N0;C4ZQ82;B7UN35;B7NM18;B7N3B8;B7MS67;B7MIA9;B7LE56;B6I930;B5YT86;B1X8R0;B1LJ43;B1IVX6;A7ZYQ8;A1A9M5	Macrodomain Ter protein	matP	0.126574	0.386377	0.637967	291.987	319.431	27.7496	27.6209	27.4446	27.9088	28.114	27.6556	27.707	27.7536	7	7	2	44	44	6.7	17.723	0	61.988	4583500000	55	304.205	277.979	245.701	340.063	392.596	284.821	295.26	305.05	39.9967	49.4705	0.136981	0.154871	28.6426	28.5138	28.3376	28.8018	29.0069	28.5486	28.6	28.6466	28.6213	5.42626	10
P39177;Q8XBT3;Q8FK07	Universal stress protein UP12	uspG	0.126439	0.498922	0.604355	5261.04	5784.7	31.53	31.6457	31.7587	31.7242	32.0868	31.5975	31.7323	31.7478	8	8	8	87.3	87.3	87.3	15.935	0	323.31	96972000000	279	4778.86	5182.06	5608.51	5474.73	7056.83	5010.1	5505.91	5565.95	367.482	883.912	0.0698497	0.152802	32.5764	32.6921	32.8051	32.7706	33.1332	32.6439	32.7787	32.7942	32.7746	11.6546	37
A1AJ78;Q1R388;Q0T9M1;P0A6X5;P0A6X4;P0A6X3;C4ZR49;B7UQI1;B7NTM8;B7MSJ0;B7MKX6;B7M8T2;B7LC31;B6I276;B5Z2H8;B1XDS3;B1LQJ2;B1IT34;A8A7R6;A7ZV41;B7NGA6	RNA-binding protein Hfq	hfq	0.125504	0.745347	0.563817	22553.7	24622.2	33.1206	33.1556	33.3847	33.257	33.521	33.2573	33.3346	33.307	9	9	9	97.1	97.1	97.1	11.166	0	323.31	300990000000	836	20843.6	21360.4	25077.9	22933	27588.4	22937.6	24212.9	23750	1902.94	2046.47	0.0843736	0.0831146	34.6801	34.715	34.9442	34.8165	35.0805	34.8168	34.8941	34.8665	34.8416	11.1504	127
P08142	Acetolactate synthase isozyme 1 large subunit	ilvB	0.12479	0.292981	0.673383	107.279	119.004	28.2203	27.9356	27.9041	28.0418	28.585	27.9383	27.8654	28.2123	18	18	17	45.9	45.9	43.8	60.44	0	192.35	17361000000	253	122.489	100.353	98.1703	108.104	158.122	100.547	95.5414	121.808	10.9994	28.456	0.10253	0.239117	27.3433	27.0587	27.0272	27.1649	27.708	27.0614	26.9885	27.3354	27.1132	11.0861	32
P45464;Q8FDA1	Penicillin-binding protein activator LpoA	lpoA	0.124695	0.44577	0.625456	185.179	204.279	29.1422	29.0516	29.0209	29.1002	29.5434	29.208	28.9808	29.0815	33	33	33	63.7	63.7	63.7	72.824	0	323.31	49293000000	478	193.49	181.604	177.74	187.881	256.239	202.622	172.814	185.441	6.93991	36.7309	0.0374768	0.179808	27.9963	27.9058	27.8751	27.9543	28.3975	28.0622	27.8349	27.9357	27.945	9.56415	60
P00935	Cystathionine gamma-synthase	metB	0.124249	0.158549	0.749467	40.27	46.3929	26.093	26.0704	26.3179	25.8421	26.3638	25.8644	25.6573	26.9349	4	4	4	14	14	14	41.55	0	22.879	1446600000	33	40.3317	39.7011	47.2111	33.8361	48.7533	34.3678	29.7278	72.7228	5.47425	19.3319	0.135939	0.416699	25.7567	25.7342	25.9816	25.5059	26.0276	25.5282	25.321	26.5987	25.7454	7.87652	5
A7ZKL2;Q0TIW6;P0A8E3;P0A8E2;P0A8E1;C4ZS48;B7UPC4;B7NAY6;B7MTN8;B7MJ95;B7LX42;B7LG41;B6I9I6;B5YVX7;B1XA18;B1LI36;B7NKH1	UPF0227 protein YcfP	ycfP	0.124058	0.420017	0.633862	1384.55	1510.47	30.331	30.1369	30.279	29.9148	30.5436	30.3039	30.1793	30.1311	12	12	1	80	80	11.1	21.226	0	323.31	42050000000	252	1545.06	1348.75	1489.84	1154.57	1793.11	1516.06	1389.38	1343.33	174.184	202.088	0.125805	0.133792	30.9637	30.7696	30.9117	30.5476	31.1764	30.9367	30.812	30.7639	30.8619	9.91438	23
P00448;P66828	Superoxide dismutase [Mn]	sodA	0.123508	0.306215	0.671158	8244.42	9097.04	32.9888	32.6134	32.8473	32.9017	33.3243	33.0726	32.6482	32.8003	16	16	16	87.4	87.4	87.4	23.097	0	323.31	337940000000	643	9121.57	7013.14	8261.1	8581.88	11536.4	9672.23	7186.07	7993.45	894.353	1927.96	0.10848	0.211932	33.4997	33.1243	33.3582	33.4126	33.8352	33.5834	33.1591	33.3112	33.3854	14.725	81
B1IW64;A8A6U8;A7ZU48;A1AI30;Q1R469;P58194;P0AAB5;P0AAB4;Q0TAL3	3-octaprenyl-4-hydroxybenzoate carboxy-lyase	ubiD	0.123097	0.445797	0.628674	161.891	178.09	28.5297	28.3719	28.5096	28.5424	28.9146	28.4671	28.3911	28.6732	18	18	18	35	35	35	55.286	0	154.69	19375000000	249	166.452	149.037	164.132	167.944	217.939	159.316	151.062	184.042	8.71187	30.0353	0.0538131	0.168652	27.7814	27.6235	27.7613	27.7941	28.1663	27.7188	27.6428	27.9248	27.7713	9.47573	39
P0AGE2;P0AGE1;P0AGE0	Single-stranded DNA-binding protein	ssb	0.123004	1.291	0.525914	9902.95	10778.8	32.8043	32.6959	32.9139	32.8671	32.9083	32.9587	32.9185	32.9877	12	12	10	77	77	69.7	18.975	0	323.31	134280000000	277	9776.74	9061.93	10556.7	10216.5	10514.9	10893.3	10590.9	11116.2	645.209	277.995	0.0651531	0.0257909	33.5988	33.4903	33.7084	33.6616	33.7028	33.7532	33.713	33.7822	33.7056	13.007	31
P77434	Glutamate-pyruvate aminotransferase AlaC	alaC	0.122612	0.351546	0.658239	144.754	159.692	28.1645	28.0716	28.12	27.9189	28.4789	28.3835	27.9768	27.9262	15	15	15	40	40	40	46.216	0	69.255	10544000000	166	154.476	144.744	149.731	130.068	192.509	180.074	135.448	130.736	10.5664	31.1905	0.0729956	0.195317	27.6747	27.5818	27.6302	27.4291	27.9891	27.8937	27.487	27.4364	27.606	6.85798	22
P26647	1-acyl-sn-glycerol-3-phosphate acyltransferase	plsC	0.122539	0.399636	0.641372	532.42	583.125	29.3947	29.0903	29.1049	29.1084	29.5024	29.0307	29.1891	29.4661	7	7	7	44.5	44.5	44.5	27.453	0	129.69	14581000000	158	618.59	499.854	504.987	506.251	667.071	479.442	535.678	650.308	57.5127	90.4837	0.108021	0.15517	29.6563	29.3519	29.3665	29.3701	29.7641	29.2924	29.4508	29.7277	29.4104	7.12928	16
Q8XAY6;P76141;B1XEA0;B1LFA3;B1IRU8;A8A065;A7ZLX0	Transcriptional regulator LsrR	lsrR	0.122503	0.82126	0.563626	37.6505	41.4009	25.7595	25.6947	25.5425	25.841	25.8773	25.8151	25.7287	25.9068	4	4	4	14.8	14.8	14.8	33.825	0	16.409	1060900000	34		37.5655	33.7688	41.6171	42.6872	40.8681	38.4702	43.578	3.92483	2.25589	0.104244	0.0544889		25.6552	25.503	25.8015	25.8378	25.7756	25.6892	25.8673	25.7756	3.90689	2
P04993	RecBCD enzyme subunit RecD	recD	0.122336	0.253828	0.692242	31.0843	34.633	26.372	26.5953	26.3729	26.2725	26.4163	26.1411	26.5193	27.0255	13	13	12	26	26	24.2	66.902	0	69.541	1475400000	48	30.3075	35.4363	30.3255	28.2678	31.2607	25.7823	33.599	47.8899	3.05789	9.42555	0.0983742	0.272155	25.3486	25.5719	25.3494	25.2491	25.3928	25.1176	25.4958	26.002	25.3711	0	4
Q8FBI8;Q1R475;Q0TAL9;P0A6A1;P0A6A0;C5A011;B7UNG5;B7NV31;B7NFD8;B7N2E3;B7MHC2;B7M640;B7L998;B6I4H7;B5YY84;B1XAJ9;B1LM23;B1IW70;A8A6U2;A7ZU42;A1AI24	Probable protein kinase UbiB	ubiB	0.12168	0.71768	0.577702	57.2282	62.4911	27.2641	27.1375	27.2672	27.117	27.535	27.2454	27.2472	27.2451	23	23	23	48.9	48.9	48.9	63.216	0	165.48	8847000000	208	59.9321	54.8488	60.0636	54.0683	72.4479	59.1508	59.2259	59.1397	3.21438	6.638	0.0561678	0.106223	26.3224	26.1958	26.3255	26.1753	26.5933	26.3037	26.3055	26.3034	26.3046	3.16993	28
Q8X6X6;P07762;B1IP32;A8A5P2;A7ZSW5;Q8FCR7;Q1R5J4;Q0TC27;A1AGW5	1,4-alpha-glucan branching enzyme GlgB	glgB	0.121286	0.274299	0.687826	24.2402	26.3917	26.5495	26.6186	26.0805	26.2339	26.733	26.5889	26.1227	26.523	18	18	17	33.2	33.2	31	84.368	0	67.721	2597000000	74	27.1489	28.4953	19.5505	21.7659	30.8707	27.9089	20.1367	26.6504	4.26934	4.52974	0.176127	0.171635	25.1914	25.2605	24.7224	24.8758	25.3749	25.2308	24.7646	25.1649	25.1782	6.71425	9
P0A903	Outer membrane protein assembly factor BamC	bamC	0.121173	0.455675	0.631051	2022.99	2224.04	31.5615	31.5082	31.5215	31.4522	31.9229	31.7226	31.4375	31.4451	24	24	23	85.8	85.8	85.2	36.842	0	323.31	110490000000	519	2095.22	2018.5	2037.4	1940.82	2698.55	2345.38	1921	1931.21	63.7615	373.032	0.0315185	0.167728	31.3988	31.3455	31.3588	31.2894	31.7602	31.5599	31.2748	31.2823	31.3521	11.196	62
P75966;Q8X724;Q8FIB6	Ribosomal large subunit pseudouridine synthase E	rluE	0.120596	0.225879	0.708021	141.146	157.863	27.3187	27.1779	27.077	26.9722	27.8271	27.1749	26.8783	27.1479	7	7	7	42.4	42.4	42.4	24.88	0	37.361	2154400000	42	159.712	144.714	134.849	125.309	227.994	144.416	117.332	141.71	14.6955	48.3145	0.104116	0.306053	27.7223	27.5815	27.4807	27.3758	28.2307	27.5785	27.2819	27.5515	27.565		5
P09980	ATP-dependent DNA helicase Rep	rep	0.120397	0.265338	0.690503	98.8346	109.697	28.193	28.2139	28.4624	28.1645	28.8845	28.205	28.3144	28.1116	27	27	25	43.8	43.8	42.8	77.023	0	165.86	16300000000	238	94.0705	95.4578	113.601	92.2094	152.655	94.8628	102.413	88.8572	9.93376	29.1709	0.100509	0.265922	26.9663	26.9872	27.2357	26.9378	27.6578	26.9783	27.0877	26.8849	26.9828	3.45943	28
A1AG69;B7N0U9;Q8X9M3;Q8FD87;Q1R6H4;Q0TCU5;P05055;C4ZSQ5;B7NKN3;B7NDF0;B7MB85;B7LH99;B6I1N9;B5YS54;B1XGX6;B1LFR6;A8A4Y0;A7ZS61;B7UJ59;B7M072;B1IQV7	Polyribonucleotide nucleotidyltransferase	pnp	0.120341	1.63543	0.520292	2480.98	2699.22	32.7932	32.9217	32.8922	32.8639	33.0615	32.9329	33.0041	32.9538	44	44	43	64.7	64.7	64.4	77.114	0	323.31	888770000000	2248	2353.52	2575.06	2522.4	2472.92	2839.94	2595.39	2728.01	2633.54	94.655	109.127	0.0381523	0.040429	31.5648	31.6933	31.6638	31.6355	31.8331	31.7045	31.7757	31.7254	31.6989	12.614	287
B1LEM1;B1XFX3;B5Z497;B7MV43;B7NBB6;B7US04;C4ZYC7;P37340;P58164;Q0THG4;A7ZMC9;B7NTX0;B7M0M0;B7L5L6;B6IBA3;A1ABK4;Q8FH68;Q1RBD2;B7MA17;A8A0L0;B1IQ91	Multidrug resistance protein MdtK	mdtK	0.120329	0.162517	0.749497	77.536	88.9383	27.1804	27.2523	27.1977	27.4598	27.9909	27.7259	26.8154	27.0395	4	4	4	11.2	11.2	11.2	49.43	0	34.198	2982600000	53	72.4667	76.207	73.3472	88.1231	127.809	106.165	56.1241	65.6554	7.23639	33.7961	0.0933294	0.379995	26.5937	26.6655	26.6109	26.873	27.4041	27.1391	26.2286	26.4527	26.6382	4	7
Q8FF70;P0A7B2;P0A7B1	Polyphosphate kinase	ppk	0.11972	0.818815	0.573486	89.0718	97.0957	28.1461	28.2669	28.1216	28.1702	28.4609	28.1529	28.2416	28.3283	34	34	34	54.4	54.4	54.4	80.42	0	323.31	27965000000	402	87.1499	94.8402	85.6653	88.6317	108.639	87.5646	93.1764	99.0028	4.0318	9.00158	0.0452646	0.0927083	26.8572	26.9779	26.8326	26.8813	27.172	26.8639	26.9527	27.0393	26.917	6.14975	46
P77150;Q8X649;Q8FH89;Q1RBF9;Q0THJ1	Pyridoxal kinase PdxY	pdxY	0.119466	0.447502	0.636106	663.938	724.621	29.5814	29.8557	29.7199	29.5673	30.0307	29.8989	29.6203	29.6523	14	14	14	79.8	79.8	79.8	31.322	0	137.74	17210000000	150	617.093	747.756	679.902	611.001	845.172	770.713	634.113	648.485	63.9717	101.07	0.096352	0.13948	29.6529	29.9272	29.7913	29.6387	30.1021	29.9703	29.6917	29.7237	29.7575	8.17493	18
A7ZQ47;Q1R8B8;Q0TEN2;P0A875;P0A874;P0A873;C4ZYM5;B7UH56;B7NSA6;B7N6J3;B7MIU5;B7M976;B7LDJ6;B6I629;B5Z226;B1XBS9;B1LPB4;B1IVM6;A8A3B4;B7MYA0	tRNA (guanine-N(1)-)-methyltransferase	trmD	0.118742	0.315134	0.675133	530.041	584.739	29.1191	29.1994	29.3011	29.2698	28.8861	29.5516	29.5047	29.4219	10	10	10	40.4	40.4	40.4	28.422	0	323.31	17549000000	118	492.469	520.975	559.42	547.298	418.365	666.665	645.129	608.797	29.7476	113.458	0.0561233	0.194032	29.3306	29.411	29.5127	29.4814	29.0977	29.7632	29.7163	29.6335	29.4971	7.88264	15
P06846	HTH-type transcriptional regulator EbgR	ebgR	0.118569	0.662016	0.597654	225.152	245.471	28.4385	28.3707	28.3293	28.2578	28.4885	28.6664	28.2955	28.4203	7	7	7	29.4	29.4	29.4	36.21	0	33.022	6458200000	110	239.448	228.348	221.823	210.99	247.967	280.87	216.629	236.418	11.9195	26.9143	0.0529399	0.109644	28.3007	28.2329	28.1915	28.12	28.3507	28.5286	28.1577	28.2825	28.2577	4.9542	12
A7ZQI9;A8A3M4;B1IUT4;B1XCS1;C4ZZP9;Q57261;B7NT89;B7N6X5;B7LXF7;B7LEG3;B6I6D5;Q8FEJ7;B5Z3A7;Q8X7Y6;B1LQ65;Q0TEB3;Q1R7U6;B7MKL9;A1AET9;B7MZ46;B7UHG4	tRNA pseudouridine synthase D	truD	0.118247	0.461333	0.635705	501.279	548.476	29.7173	29.5307	29.6201	29.5408	30.0018	29.6301	29.498	29.752	18	18	18	62.5	62.5	62.5	39.091	0	323.31	31051000000	223	542.597	476.124	506.878	479.516	662.185	510.44	465.366	555.914	30.7948	84.3388	0.0614326	0.153769	29.4691	29.2824	29.3718	29.2926	29.7536	29.3818	29.2498	29.5037	29.3768	8.19967	24
Q46939	Probable acetyl-CoA acetyltransferase	yqeF	0.117327	0.183421	0.739319	22.0724		25.6919	24.8225	24.8251	25.3226	25.5969	25.3098	25.2819	24.9427	5	5	5	19.6	19.6	19.6	41.018	0	19.68	469350000	14	30.8573	16.7878	16.818	23.8266					6.72774		0.304803		25.3743	24.5048	24.5074	25.005					24.7562	6.82018	5
B1IXP8;B7N5Q6;Q8XCV1;Q0TFF2;P0A8W9;P0A8W8;C4ZVI7;B7NNX3;B7MXH3;B7MG58;B7M5X3;B7LBE8;B6I7L6;B5YXT4;B1X905;B1LLP8;A7ZPA8;B7UFV2	UPF0304 protein YfbU	yfbU	0.11729	0.661338	0.599277	2715.95	2954.78	30.9243	31.0886	30.9447	31.101	31.2981	30.9687	31.0712	31.1897	16	16	16	93.9	93.9	93.9	19.536	0	323.31	116580000000	361	2545.42	2855.75	2582.01	2880.63	3306.8	2625.8	2821.25	3065.26	176.716	295.624	0.065066	0.100049	31.6767	31.8411	31.6971	31.8534	32.0505	31.7212	31.8237	31.9422	31.8324	10.4377	48
P0AEE1	Inner membrane lipoprotein DcrB	dcrB	0.116998	0.692089	0.59715	5013.34	5447.89	31.9528	31.7714	31.9014	32.0071	32.1462	31.8903	31.9396	32.1245	10	10	10	65.4	65.4	65.4	19.787	0	323.31	108850000000	277	5162.9	4547.14	4980.27	5363.04	5911.55	4942.02	5115.48	5822.49	347.895	490.477	0.0693939	0.0900307	32.6868	32.5054	32.6354	32.7411	32.8802	32.6244	32.6737	32.8586	32.6802	11.754	37
B1XGC4;C4ZUX4;P21888;B7ME49;Q8FK44;Q1RF08;Q0TKB5;B7UKK3;B7NL20;B7MRI9;B7M4M9;B7L7F3;B6I0H1;B1LKE5;B1IZ75;A7ZXI1;A7ZIT5;A1A8J2;B7N980;Q8XCT9;B5YPP1	Cysteine--tRNA ligase	cysS	0.116454	0.369799	0.663165	1684.96	1849.5	31.6573	31.7704	31.7484	31.8306	32.1611	31.818	31.9598	31.5337	29	29	29	62.5	62.5	62.5	52.202	0	323.31	185930000000	867	1575.74	1705.56	1679.55	1778.98	2242.16	1763.37	1947.37	1445.12	84.1074	334.02	0.0499166	0.1806	30.9918	31.1049	31.0829	31.1651	31.4956	31.1525	31.2942	30.8682	31.1287	9.74147	120
P0ACV1;P0ACV0	Lipid A biosynthesis lauroyltransferase	lpxL	0.116443	0.279062	0.69	396.186	437.299	29.0081	29.1596	29.0481	29.2707	29.6443	29.3571	28.9839	28.9671	7	7	7	33.3	33.3	33.3	35.406	0	113.13	13629000000	90	364.963	405.803	375.345	438.633	569.753	465.973	358.839	354.633	33.1836	102.235	0.0837575	0.233787	28.9027	29.0542	28.9428	29.1653	29.5389	29.2517	28.8785	28.8617	28.9985	3.58496	13
P0A990;P0A989;P0A988;P0A988-2	Beta sliding clamp	dnaN	0.115883	0.341934	0.672025	869.416	947.647	30.4156	30.5508	30.2035	30.5794	30.8681	30.3126	30.4671	30.565	18	18	17	64.2	64.2	61.5	40.586	0	323.31	47385000000	292	851.784	936.347	734.242	955.292	1169.26	792.509	883.088	945.729	100.726	160.575	0.115855	0.169446	30.1132	30.2484	29.9011	30.277	30.5657	30.0102	30.1648	30.2626	30.2066	9.82337	35
P0AFW6;P0AFW5;P0AFW4	Regulator of nucleoside diphosphate kinase	rnk	0.115574	0.339949	0.672967	580.99	636.711	28.3281	28.4437	28.5713	28.3481	28.8308	28.5588	28.5845	28.1794	6	6	6	75	75	75	14.927	0	88.348	5705000000	57	542.468	588.208	643.159	550.125	771.302	637.554	649.135	488.852	46.0202	115.661	0.07921	0.181653	29.4688	29.5844	29.7119	29.4888	29.9714	29.6994	29.7251	29.3201	29.6419	10.5708	7
P15254;Q8XA46;Q8FF26;Q1R8H7;Q0TET1	Phosphoribosylformylglycinamidine synthase	purL	0.115548	0.586762	0.618595	100.885	109.817	29.2716	29.1607	29.1614	29.0768	29.4487	29.1967	29.0921	29.3952	49	49	47	52	52	49.4	141.4	0	323.31	41346000000	535	108.378	100.282	100.327	94.5545	122.682	102.841	95.5768	118.169	5.68299	12.7374	0.0563313	0.115987	27.1685	27.0576	27.0583	26.9736	27.3456	27.0936	26.989	27.2921	27.0759	9.68124	67
A7ZPW1;B7LDB0;P0A764;C4ZX93;B7N6A6;B7M7M2;P0A763;B6I590;B5Z0Y7;B1XAZ3;B1IWE3;A8A324;A1AE56;B1LNH3;B7MI03;B7NRG8;Q0TEW7;Q1R8L4;Q8FF53;B7MYF2;B7UGW4	Nucleoside diphosphate kinase	ndk	0.115247	0.273037	0.694112	6032.36	6539.43	32.0684	31.4844	31.7588	31.9027	31.9615	31.878	31.6198	32.216	9	9	9	81.8	81.8	81.8	15.463	0	323.31	117550000000	297	7181.34	4771.24	5781.91	6394.94	6663.51	6285.07	5245.84	7963.29	1017.31	1122.62	0.168642	0.17167	33.1581	32.5742	32.8486	32.9925	33.0513	32.9677	32.7096	33.3058	32.9801	14.2058	38
A1AAT4;B7MUG2;Q0TI43;P0A8R8;P0A8R7;C4ZV70;Q1RC43;B7MLZ8;B1XCF0;B1IST8;A7ZZR4;B5Z0P2;A7ZLF1;B6IA37;B7L587;B7LYI8;B7N4C9;Q8X8K9;B1LGA6;B7NHM5;B7URD0	UPF0283 membrane protein YcjF	ycjF	0.115033	0.334889	0.674422	108.174	117.649	27.1551	27.4842	27.582	27.445	27.7826	27.5337	27.5808	27.2293	6	6	6	30	30	30	39.392	0	104.84	3102200000	47	89.5379	112.744	120.728	109.687	138.933	116.717	120.631	94.3138	13.2675	18.3239	0.12265	0.155751	26.8958	27.2249	27.3227	27.1857	27.5233	27.2744	27.3215	26.97	27.2497	5.08746	7
P00811	Beta-lactamase	ampC	0.114446	0.765963	0.597039	105.117	114.122	27.4748	27.5566	27.3862	27.4219	27.7654	27.508	27.5082	27.5156	13	13	13	48	48	48	41.555	0	86.775	5875600000	111	106.11	112.37	99.734	102.255	130.058	108.611	108.627	109.191	5.50027	10.6276	0.052325	0.0931252	27.1383	27.2202	27.0498	27.0855	27.429	27.1716	27.1718	27.1792	27.1717	5.20945	13
P24193	Carbamoyl dehydratase HypE	hypE	0.114377	0.372248	0.665398	198.699	213.487	27.8504	28.3779	28.2426	27.9753	28.2726	28.1363	28.3652	28.1297	11	11	10	46.1	46.1	39.6	35.092	0	91.888	10109000000	154	163.737	236.891	215.479	178.69	220.044	200.024	234.786	199.092	33.4812	17.1765	0.168502	0.0804568	27.7579	28.2854	28.1501	27.8827	28.18	28.0438	28.2726	28.0371	28.0969	4.16993	19
A1AIG8;B7MIY3;Q8FB74;Q1R5W3;Q0TA68;P29680;C5A0T8;B7NFT8;B7UPF2;B7M7Q6;B6I5K8;B1XC00;B1LNU9;B1IUQ0;A8A797;A7ZUL3;B7N2J9;B5Z093;Q8X6X5;B7LA91;B7NRT0	Uroporphyrinogen decarboxylase	hemE	0.113492	0.418575	0.658646	708.958	774.17	30.032	30.2048	30.1084	30.0673	30.4522	30.3673	30.0666	29.9802	18	18	18	55.4	55.4	55.4	39.234	0	295.68	40946000000	206	673.821	760.486	710.841	690.683	904.318	852.16	690.373	649.83	37.5378	123.157	0.0529478	0.159083	29.7785	29.9513	29.8548	29.8138	30.1987	30.1138	29.8131	29.7267	29.8343	3.32193	20
P37194	Outer membrane protein Slp	slp	0.112685	0.543227	0.633756	384.443	416.045	28.3483	28.4347	28.1254	28.3779	28.2569	28.4044	28.5041	28.5716	6	6	6	54.8	54.8	54.8	20.964	0	146.1	8391500000	102	390.411	414.769	334.013	398.581	366.207	406.062	435.417	456.495	35.111	39.1363	0.0913295	0.0940673	28.999	29.0854	28.7761	29.0285	28.9076	29.0551	29.1548	29.2223	29.0418	8.71768	15
P27550;Q8FAY8;Q8X5T5	Acetyl-coenzyme A synthetase	acs	0.111979	0.614599	0.624726	53.9164	58.5988	27.2805	27.258	27.3028	27.3668	27.663	27.3449	27.3321	27.3159	19	19	19	38.2	38.2	38.2	72.093	0	247.29	10415000000	205	53.0881	52.2591	53.9235	56.3947	69.3936	55.539	55.0423	54.4204	1.78652	7.21107	0.033135	0.123058	26.1492	26.1267	26.1715	26.2355	26.5318	26.2137	26.2008	26.1846	26.1927	11.196	28
P0AG25;P0AG24	Guanosine-3,5-bis(diphosphate) 3-pyrophosphohydrolase	spoT	0.111769	0.827073	0.597113	112.157	121.244	28.3928	28.5262	28.606	28.4123	28.6694	28.5215	28.6793	28.5142	32	32	30	54.6	54.6	52.3	79.342	0	288.46	22835000000	298	105.001	115.283	121.902	106.442	127.44	114.9	128.323	114.313	7.92908	7.67661	0.0706964	0.0633154	27.1233	27.2567	27.3365	27.1428	27.3999	27.252	27.4098	27.2447	27.2544	5.2854	42
P77338	Mechanosensitive channel MscK	mscK	0.110676	0.711359	0.614394	59.4984	64.4736	28.2259	28.2485	28.3548	28.2168	28.574	28.2743	28.2975	28.3429	29	29	29	34.5	34.5	34.5	127.21	0	323.31	22683000000	313	57.9887	58.9161	63.4674	57.6212	73.9935	59.9875	60.9728	62.9408	2.70152	6.46423	0.0454049	0.100262	26.2753	26.298	26.4043	26.2662	26.6234	26.3237	26.347	26.3924	26.3354	4	36
A7ZP50;A8A296;B1X8C6;B7MFZ8;B7N5J4;B7UFP4;C4ZU73;P17993;Q1R9I4;B1LLI3;B7MXR3;B7M5R7;B7LAP9;B6I7I7;B5YX17;B1IXV6;Q8XE29;Q0TFL0;B7NN47;Q8FFP0	Ubiquinone biosynthesis O-methyltransferase	ubiG	0.110635	0.219982	0.728019	1030.31	1142.94	29.9041	30.0611	30.1895	30.131	30.7462	30.0396	29.8888	30.0537	12	12	12	60.4	60.4	60.4	26.555	0	323.31	37248000000	254	913.898	1020.08	1116.05	1071.23	1648	1004.81	904.122	1014.84	86.9538	340.399	0.0843954	0.297827	30.2137	30.3707	30.4992	30.4406	31.0558	30.3492	30.1984	30.3634	30.367	10.4553	32
B1X8Z8;B7LAU8;Q8FFJ7;Q1R9D1;B7NNW5;B7N5P8;B7MXG5;B7MG50;B7M5W5;B6I7N6;B1LLN9;B1IXQ6;A8A2F5;A7ZPA0;A1ADD4;Q8XCW9;B5YXS6;B7UFU4	NADH-quinone oxidoreductase subunit C/D	nuoC	0.110466	0.340226	0.68371	927.106	1013.29	31.3917	31.2059	31.24	31.3379	31.7344	31.4503	31.0985	31.3341	42	42	2	74.3	74.3	3	68.694	0	323.31	224540000000	1178	991.455	870.565	891.587	954.817	1260.36	1033.02	807.503	952.293	55.8784	189.297	0.0602719	0.186813	30.3301	30.1443	30.1784	30.2763	30.6728	30.3887	30.037	30.2725	30.2744		167
B1X7K4;C4ZSJ8;P00959;A7ZNT3;B1LN54;B6HYV5;B7L9Y6;B7M4V9;B7MX36;B7NPL8;Q8X7E7;B7UFD1;B5YV64;A8A1X8;B1IYW7;Q0TFX8;Q8FFX8;Q1R9V8;B7MEG9;A1ACX8;B7NCE4	Methionine--tRNA ligase	metG	0.110435	0.599831	0.630816	960.205	1042.06	31.4377	31.5738	31.5023	31.4688	31.8515	31.5103	31.5291	31.5335	46	46	46	73.7	73.7	73.7	76.254	0	323.31	346760000000	1407	921.466	1013.54	964.067	941.751	1231.08	969.475	982.348	985.358	39.5825	126.197	0.041223	0.121103	30.2255	30.3615	30.2901	30.2566	30.6393	30.298	30.3169	30.3213	30.3075	11.3287	168
P0AG42;P0AG41;P0AG40	Bifunctional riboflavin kinase/FMN adenylyltransferase	ribF	0.110146	0.417646	0.664241	255.777	278.122	28.4327	28.6071	28.3673	28.4728	28.895	28.4546	28.4964	28.4746	16	16	16	56.5	56.5	56.5	34.734	0	323.31	17280000000	181	248.709	281.02	237.584	255.796	343.781	252.552	260.049	256.108	18.4221	43.8792	0.0720241	0.15777	28.3549	28.5294	28.2896	28.3951	28.8173	28.3768	28.4186	28.3968	28.3959	7.74147	16
A7ZSA4;Q1R6C9;Q0TCQ4;P0A896;P0A895;P0A894;C4ZSU4;B7UJU5;B7NKS2;B7NDI9;B7N0J8;B7MBX4;B7M0S3;B7LHQ9;B6I1S8;B5YST8;B1XHI0;B1LGH1;B1IQR8;A8A520;A1AGA6	RNase adapter protein RapZ	rapZ	0.110126	0.47479	0.65483	734.736	800.166	29.8759	29.889	29.9146	29.8541	30.2975	29.8645	29.8497	29.9624	18	18	18	66.5	66.5	66.5	32.492	0	297.25	26666000000	300	730.811	737.534	750.857	719.741	981.709	724.996	717.542	776.416	13.0125	123.827	0.0177105	0.154751	29.8944	29.9075	29.9331	29.8726	30.316	29.883	29.8682	29.9809	29.901	7.81378	30
P15977	4-alpha-glucanotransferase	malQ	0.109673	0.411274	0.664948	173.59	188.686	29.2295	28.9978	29.0642	29.0803	29.4531	29.2429	28.9321	29.1824	22	22	22	42.8	42.8	42.8	78.503	0	323.31	26129000000	284	190.667	162.112	169.823	171.756	222.975	192.457	154.829	184.482	12.1231	28.0117	0.0698378	0.148457	27.9754	27.7436	27.81	27.8262	28.1989	27.9887	27.678	27.9283	27.8772	6.39232	35
P0A9U1	Probable multidrug ABC transporter ATP-binding protein YbhF	ybhF	0.108955	0.160266	0.761126	24.1542	30.3807	26.004	26.1514	25.8478	25.8296	26.0019	26.7388	25.5261	26.0018	5	5	5	12.6	12.6	12.6	63.132	0	54.543	1017800000	28	24.8365	27.5354	22.2637	21.981	24.7995	41.5446		24.7981	2.59454	9.66822	0.107416	0.318235	25.0642	25.2116	24.908	24.8898	25.0621	25.799		25.062	25.0621		5
P27241	Lipopolysaccharide core biosynthesis protein RfaZ	rfaZ	0.108878	0.359296	0.68145	95.121	103.419	27.1313	26.8457	26.9653	26.9733	27.3549	27.0502	26.7925	27.1535	7	7	7	21.2	21.2	21.2	32.92	0	36.687	4038100000	77	105.565	86.4274	93.9809	94.5101	123.452	99.7354	83.2721	107.219	7.88112	16.6854	0.0828536	0.161337	27.131	26.8453	26.965	26.973	27.3545	27.0498	26.7922	27.1532	27.0114		10
P69812;P69811	Multiphosphoryl transfer protein	fruB	0.108637	0.570732	0.640067	4659.16	5030.46	32.6427	32.7922	32.9193	32.8661	32.9391	32.7856	32.8431	33.0871	27	27	27	84.3	84.3	84.3	39.647	0	323.31	576050000000	1234	4147.71	4605.36	5033.8	4849.78	5104.03	4584.16	4772.44	5661.22	383.479	472.236	0.0823064	0.0938753	32.3741	32.5236	32.6507	32.5975	32.6705	32.517	32.5745	32.8184	32.586	9.20457	156
A8A888;B7NH28;Q8XB59;Q8FA73;Q1R2E6;P39401;C4ZT42;B7NVC9;B7UQY8;B7N380;B7MNB1;B7LXS2;B7LE10;B6I2P2;B5Z4P2;B1LEG3;A7ZVP9;B1IS59;Q0T8V3	Phosphoglycerol transferase I	mdoB	0.108288	0.414979	0.667362	88.0172	95.7254	28.1457	28.3232	28.276	28.2414	28.6772	28.2984	28.2398	28.204	27	27	26	39.8	39.8	38.7	85.463	0	280.96	20334000000	246	81.9321	92.7741	89.7551	87.6075	118.87	91.1783	87.5101	85.3439	4.57691	15.6162	0.0520002	0.163135	26.769	26.9465	26.8992	26.8647	27.3005	26.9217	26.8631	26.8273	26.8819	7.41785	29
Q0TDR0;P0A819;P0A818;P0A817;C5A0L1;B7UHY9;B7NI05;B7N7J5;B7LYX2;B7LFK4;B6I780;B5YQD9;B1XFA4;B1LDF1;B1IT65;A8A481;A7ZR64	S-adenosylmethionine synthase	metK	0.108179	0.458089	0.660956	4022.02	4342.27	32.4657	32.711	32.7796	32.7442	32.8812	32.768	32.9176	32.5664	24	24	24	69	69	69	41.951	0	323.31	278210000000	967	3460.96	4109.35	4311.54	4206.23	4629.58	4276.69	4748.88	3713.91	383.043	464.401	0.0952365	0.106949	32.1156	32.3608	32.4295	32.3941	32.5311	32.4179	32.5674	32.2163	32.406	12.7871	140
P23331;Q8FHX4;P0A3L9	Thymidine kinase	tdk	0.107973	0.333884	0.68943	510.324	556.941	28.96	28.9338	28.8786	28.7935	29.1963	28.6884	28.8694	29.2437	9	9	9	49.3	49.3	49.3	23.456	0	121.77	7041100000	64	534.887	525.154	505.245	476.01	631.097	442.25	501.987	652.429	25.9905	101.31	0.0509293	0.181904	29.4487	29.4224	29.3672	29.2821	29.6849	29.177	29.358	29.7324	29.3948	7.17991	6
P76185	Uncharacterized protein YdhJ	ydhJ	0.107938	0.352845	0.685254	106.096	114.293	27.1347	27.2096	26.7763	27.1397	27.2673	27.3289	27.1681	26.9276	10	10	10	49.5	49.5	49.5	31.495	0	91.39	3565700000	51	110.649	116.604	86.0953	111.036	121.417	126.77	113.266	95.7168	13.6086	13.5717	0.128267	0.118745	27.1981	27.273	26.8398	27.2031	27.3308	27.3924	27.2315	26.9911	27.2173		9
B1XFJ6;C4ZT68;P32099;B7NH54;Q8FA49;P60776;B7UR14;B7MNJ3;B7NW66;B6I6N3;B1LEJ1;B1IS33;A8A8B4;A7ZVS8;B7LEN2;B7LXU8;Q0T8S7;A1AJV3;B7MTD2;Q1R257	Lipoate-protein ligase A	lplA	0.107756	0.350292	0.686378	151.814	165.066	27.7756	28.0001	27.8792	27.7492	28.2678	27.8148	27.7331	28.0194	10	10	10	28.1	28.1	28.1	37.925	0	92.309	5177400000	118	143.655	168.109	154.465	141.027	202.768	147.653	139.443	170.4	12.3218	28.3414	0.0811634	0.171697	27.571	27.7955	27.6746	27.5446	28.0633	27.6102	27.5285	27.8148	27.6424	7.21917	15
P33941	ABC transporter ATP-binding/permease protein YojI	yojI	0.107739	0.312082	0.69363	77.6512	85.068	27.5557	27.6292	27.5738	27.6221	28.1111	27.4608	27.5436	27.6964	13	13	13	35.6	35.6	35.6	61.552	0	151.28	5550600000	112	75.5165	79.5038	76.4753	79.1091	111.409	70.658	74.8748	83.3304	1.95765	18.334	0.0252108	0.215522	26.6525	26.726	26.6705	26.7189	27.2079	26.5575	26.6403	26.7932	26.6947	2.32193	15
P37051;P0A440	Formyltetrahydrofolate deformylase	purU	0.107568	0.436741	0.666373	1148.7	1238.91	30.5463	30.5586	30.261	30.5972	30.8038	30.5844	30.582	30.4231	15	15	15	74.6	74.6	74.6	31.934	0	323.31	58999000000	285	1189.17	1199.43	973.884	1232.3	1424.1	1221.34	1219.27	1090.92	117.985	137.708	0.102712	0.111153	30.5898	30.602	30.3045	30.6407	30.8473	30.6279	30.6255	30.4666	30.6138	10.3376	35
Q1RG29;Q0TLH2;P0AF14;P0AF13;P0AF12;C4ZRQ2;B7UIK6;B7NIC2;B7N828;B7MP21;B7MBE2;B7M1A0;B7LGM1;B6HZD5;B5Z0D9;B1XD29;B1LGW2;B1IQI1;A7ZWA7;A7ZHQ1;A1A7K5	5-methylthioadenosine/S-adenosylhomocysteine nucleosidase	mtnN	0.107135	0.341391	0.689486	3321.12	3607.16	31.6122	31.6637	31.7466	31.4504	31.9957	31.4809	31.8479	31.577	9	9	9	73.3	73.3	73.3	24.354	0	323.31	73177000000	231	3297.92	3418.91	3623.1	2944.56	4313.62	3008.12	3889.42	3217.46	284.657	602.629	0.0857111	0.167065	32.0467	32.0981	32.181	31.8848	32.4301	31.9153	32.2823	32.0114	32.0724	11.7912	23
A8A2T4;B1IWM6;B1XAA7;C4ZX09;P36553;B7MHT7;Q8XBI4;Q8FFA3;Q0TF33;B7UGD5;B7NPX2;B7MY86;B7LCI0;B7M6U5;B5YZY1;B1LMN0;A7ZPN6;A1ADV0;B6I512;B7N626	Oxygen-dependent coproporphyrinogen-III oxidase	hemF	0.10669	0.177732	0.752987	53.4276	59.2403	26.0155	26.2262	26.1757	26.4276	26.7631	25.7904	26.5704	26.1478	4	4	4	14.7	14.7	14.7	34.322	0	8.7312	1208400000	33	46.3361	53.7046	51.8364	61.8335	78.2064	39.5814	68.3396	50.8336	6.41761	17.3172	0.120118	0.292321	25.9549	26.1657	26.1151	26.367	26.7025	25.7299	26.5099	26.0872	26.1404	5.45943	4
[truncated: 1,488 more rows]
[truncated: 9 more columns]
